# Supplementary material for: Synthesis of the [7-5-5] tricyclic core of Daphniphyllum alkaloids
Source: Royal Society of Chemistry journal article supplement (doi:10.1039/c8ob00859k), 2018-01-01

**General Remarks:** Nuclear magnetic resonance ( $^1\text{H}$  NMR (400 MHz),  $^{13}\text{C}$  NMR (100 MHz)) spectra were determined on a JEOL-ECS400 instrument. Chemical shifts for  $^1\text{H}$  NMR are reported in parts per million downfields from tetramethylsilane ( $\delta$ ) as the internal standard and coupling constants are in hertz (Hz). The following abbreviations are used for spin multiplicity: s = singlet, d = doublet, t = triplet, q = quartet, m = multiplet, br = broad. Chemical shifts for  $^{13}\text{C}$  NMR were reported in ppm relative to the center line of a triplet at 77.16 ppm for deuteriochloroform. Infrared (IR) spectra were recorded on a JASCO FT/IR-410 Fourier Transform Infrared Spectrophotometer and were reported in wavenumbers ( $\text{cm}^{-1}$ ). High resolution mass spectra (HRMS) were obtained on a JEOL JMS-T100LP AccuTOF LC-plus either in positive electrospray ionization (ESI) method or in positive direct analysis in real time (DART) ionization method, using sodium trifluoroacetate (TFANa) or polyethylene glycol (PEG) as the internal standard. Melting points (mp) were determined on a Yanaco Micro Melting Point Apparatus. Analytical thin layer chromatography (TLC) was performed on Merck precoated analytical plates, 0.25 mm thick, silica gel 60 F<sub>254</sub>. Preparative TLC separations were performed on Merck analytical plates (0.25 or 0.50 mm thick) precoated with silica gel 60 F<sub>254</sub> unless otherwise noted. Flash chromatography separations were performed on KANTO CHEMICAL Silica Gel 60 (spherical, 40-100 mesh) unless otherwise noted. Reagents were commercial grades and were used without any purification. Dehydrated tetrahydrofuran, diethyl ether, dichloromethane, and toluene were purchased from Kanto Chemicals Co., Inc., and were purified using a Glass Contour Solvent System. Dehydrated *N,N*-dimethylformamide was purchased from Kanto Chemicals Co., Inc. and stored over activated MS4A.\* 3-Bromopropyl *tert*-butyldimethylsilyl ether,<sup>1</sup> (iodomethyl)tributylstannane,<sup>2</sup> and hydroxycarbonimidic dibromide (**40**)<sup>3</sup> were prepared according to the reported procedure. Cerium chloride was dried according to the reported procedure.<sup>4</sup> All reactions sensitive to oxygen or moisture were conducted under an argon atmosphere.

### Silyl ether S1

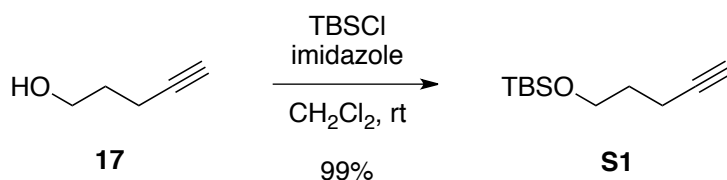

To a solution of 4-pentyn-1-ol (**17**, 24.8 g, 295 mmol) and imidazole (21.1 g, 309 mmol) in dichloromethane (295 mL) was added *tert*-butyldimethylsilyl chloride (44.9 g, 298 mmol) at 0 °C,

\* Molecular sieves were “activated” in the following manner: A round-bottom flask containing molecular sieves was heated in a regular microwave for 1.5-2.0 minute and the flask was immediately evacuated. When cooled to room temperature, the flask was backfilled with argon. The above procedure was repeated three times.

and the resulting mixture was stirred for 1 h. After completion of the reaction, the reaction mixture was partitioned between dichloromethane and water. The aqueous phase was extracted twice with dichloromethane. The combined organic extracts were dried over sodium sulfate, filtered and concentrated under reduced pressure. The residue was purified by flash column chromatography (2% ethyl acetate/hexane) to afford **S1** (58.2 g, 293 mmol, 99.3 %) as a colorless oil. IR (film) 3313, 2954 2932, 2859, 1469, 1254, 1107, 981, 836, 777;  $^1\text{H}$  NMR ( $\text{CDCl}_3$ )  $\delta$  3.70 (t,  $J$  = 6.5 Hz, 2H), 2.27 (td,  $J$  = 6.6, 2,7 Hz, 2H), 1.92 (t,  $J$  = 2.7 Hz, 1H), 1.72 (tt,  $J$  = 6.6, 6.5 Hz, 2H), 0.89 (s, 9H), 0.06 (s, 6H);  $^{13}\text{C}$  NMR ( $\text{CDCl}_3$ )  $\delta$  84.3 (C), 68.2 (CH), 61.4 ( $\text{CH}_2$ ), 31.5 ( $\text{CH}_2$ ), 25.9 ( $\text{CH}_3$ ), 18.3 (C), 14.8 ( $\text{CH}_2$ ), -5.4 ( $\text{CH}_3$ ); HRMS (DART) 199.1518 (calcd for  $\text{C}_{11}\text{H}_{22}\text{OSi}$  199.1512).

### Propargyl alcohol **18**

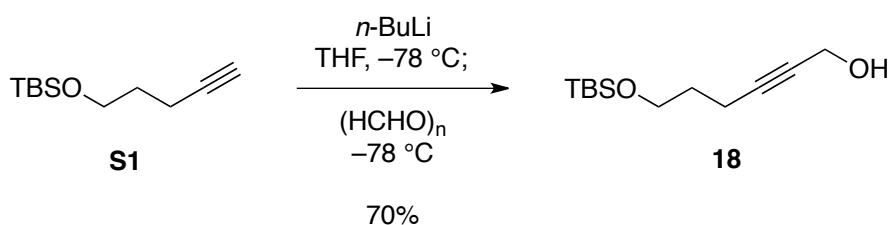

To a solution of silyl ether **S1** (58.2 g, 293 mmol) in THF (293 mL) was added *n*-butyllithium (2.65 M solution in *n*-hexane, 133 mL, 352 mmol) at 0 °C slowly over 25 minutes. The mixture was stirred for 30 min, paraformaldehyde (9.70 g, 322 mmol) was added. The mixture was stirred for 6 h. After completion of the reaction, the reaction mixture was quenched with saturated aqueous ammonium chloride at 0 °C. The solution was partitioned between ethyl acetate and water. The aqueous phase was extracted twice with ethyl acetate. The combined organic extracts were dried over sodium sulfate, filtered and concentrated under reduced pressure. The residue was distilled (1 mmHg, 105-115 °C) to afford **18** (47.2 g, 207 mmol, 70.6%) as a colorless oil. IR (film) 3346, 2861, 1728, 1470, 1390, 1252, 1112, 1071, 1012, 970, 848, 782;  $^1\text{H}$  NMR ( $\text{CDCl}_3$ )  $\delta$  4.25 (dt,  $J$  = 6.0, 2.3 Hz, 2H), 3.68 (t,  $J$  = 6.9 Hz, 2H), 2.30 (tt,  $J$  = 6.9, 2.3 Hz, 2H), 1.71 (tt,  $J$  = 6.9, 6.9 Hz, 2H), 1.52 (td,  $J$  = 6.0, 2.3 Hz, 1H), 0.89 (s, 9H), 0.05 (s, 6H);  $^{13}\text{C}$  NMR ( $\text{CDCl}_3$ )  $\delta$  86.2 (C), 78.4 (C), 61.6 ( $\text{CH}_2$ ), 51.4 ( $\text{CH}_2$ ), 31.6 ( $\text{CH}_2$ ), 25.9 ( $\text{CH}_3$ ), 18.3 (C), 15.2 ( $\text{CH}_2$ ), -5.3 ( $\text{CH}_3$ ); HRMS (ESI+) 251.1443 (calcd for  $\text{C}_{12}\text{H}_{24}\text{NaO}_2\text{Si}$  251.1443).

## (Z)-Allyl alcohol S2

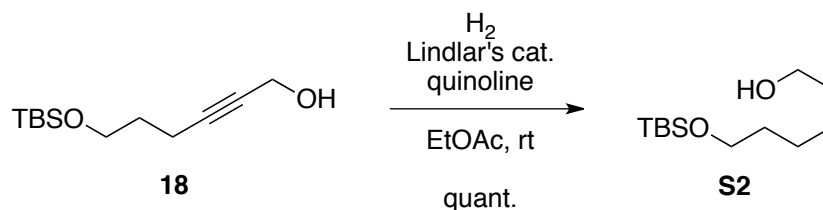

To a solution of propargyl alcohol **18** (33.8 g, 147 mmol) in ethyl acetate (300 ml) were added quinoline (18.5 ml, 154 mmol) and Lindlar's catalyst (1.56 g, 14.7 mmol) at room temperature and then hydrogen gas was purged. After stirring for 3 h, the reaction mixture was filtered through a pad of celite. The filtrate was extracted five times with hydrochloric acid (1.0 M) aqueous. The combined organic phases were extracted with saturated aqueous sodium bicarbonate, washed with brine, dried over sodium sulfate, filtered and concentrated under reduced pressure. The residue was purified by flash column chromatography (10% ethyl acetate/hexane) to afford **S2** (34.1 g, 100%) as a yellow oil. IR (film) 3347, 3015, 2932, 2859, 1469, 1389, 1254, 1103, 1042, 1009, 838, 777; <sup>1</sup>H NMR (CDCl<sub>3</sub>) δ 5.70 (dt, *J* = 11.0, 6.2 Hz, 1H), 5.55 (dt, *J* = 11.0, 7.1 Hz, 1H), 4.16 (d, *J* = 6.2 Hz, 2H), 3.63 (t, *J* = 6.0 Hz, 2H), 2.19 (td, *J* = 7.3, 7.1 Hz, 2H), 1.76 (br s, 1H), 1.58 (m, 2H), 0.90 (s, 9H), 0.06 (s, 6H); <sup>13</sup>C NMR (CDCl<sub>3</sub>) δ 132.5 (CH), 129.2 (CH), 61.8 (CH<sub>2</sub>), 58.2 (CH<sub>2</sub>), 32.1 (CH<sub>2</sub>), 25.9 (CH<sub>3</sub>), 23.3 (CH<sub>2</sub>), 18.3 (C), -5.3 (CH<sub>3</sub>); HRMS (ESI+) 253.1595 (calcd for C<sub>12</sub>H<sub>26</sub>NaO<sub>2</sub>Si 253.1600).

## Ester 19

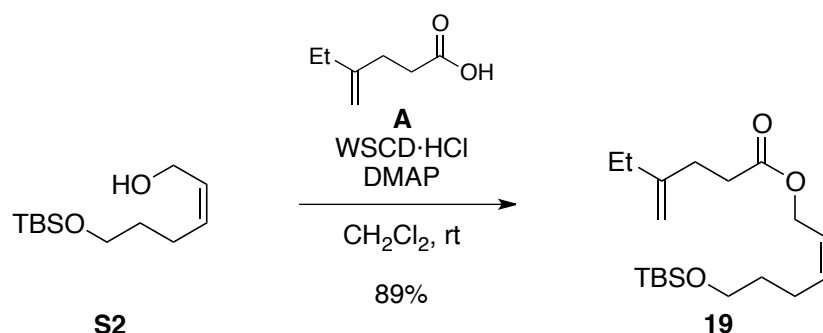

To a solution of **S2** (26.0 g, 113 mmol) and **A** (15.2 g, 119 mmol) in dichloromethane (225 mL) was added WSCD·HCl (23.8 g, 124 mmol) and DMAP (689 mg, 5.64 mmol) at 0 °C, and the resulting mixture was stirred at room temperature for 13 h. After completion of the reaction, the reaction mixture was quenched with water. The solution was partitioned between dichloromethane and water. The aqueous phase was extracted twice with dichloromethane. The combined organic extracts were dried over sodium sulfate, filtered and concentrated in reduced pressure. The residue was purified by flash column chromatography (3% ethyl acetate/hexane) to afford **19** (34.5

g, 101 mmol, 89.3%) as a colorless oil. IR (film) 2932, 2859, 1740, 1648, 1466, 1363, 1254, 1156, 777, 966, 891, 838;  $^1\text{H}$  NMR ( $\text{CDCl}_3$ )  $\delta$  5.63 (dt,  $J = 11.0, 7.2$  Hz, 1H), 5.55 (dt,  $J = 11.0, 6.6$  Hz, 1H), 4.75 (s, 1H), 4.70 (s, 1H), 4.63 (d,  $J = 6.6$  Hz, 2H) 3.61 (t,  $J = 6.0$  Hz, 2H), 2.45 (t,  $J = 8.2$  Hz, 2H), 2.35 (t,  $J = 8.2$  Hz, 2H), 2.17 (dt,  $J = 7.6, 7.2$  Hz, 2H), 2.03 (q,  $J = 7.6$  Hz, 2H), 1.58 (m, 2H), 1.03 (t,  $J = 7.6$  Hz, 3H), 0.89 (s, 9H), 0.04 (s, 6H);  $^{13}\text{C}$  NMR ( $\text{CDCl}_3$ )  $\delta$  173.3 (C), 149.7 (C), 134.7 (CH), 123.8 (CH), 108.1 ( $\text{CH}_2$ ), 62.3 ( $\text{CH}_2$ ), 60.3 ( $\text{CH}_2$ ), 32.8 ( $\text{CH}_2$ ), 32.5 ( $\text{CH}_2$ ), 31.0 ( $\text{CH}_2$ ), 28.9 ( $\text{CH}_2$ ), 25.9 ( $\text{CH}_3$ ), 23.9 ( $\text{CH}_2$ ), 18.3 (C), 12.3 ( $\text{CH}_3$ ),  $-5.3$  ( $\text{CH}_3$ ); HRMS (ESI+) 363.2323 (calcd for  $\text{C}_{19}\text{H}_{36}\text{NaO}_3\text{Si}$  363.2331).

### Carboxylic acid **20**

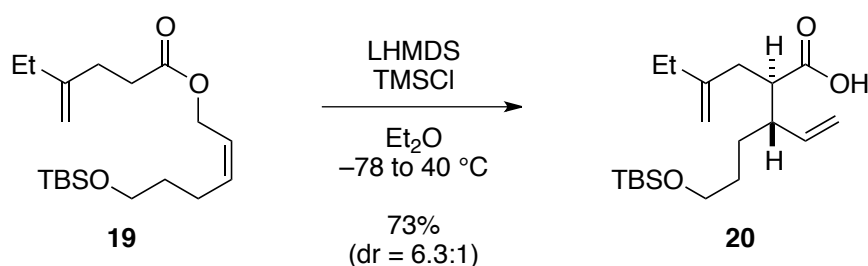

To a solution of **19** (31.5 g, 92.5 mmol) in diethyl ether (308 mL) was added trimethylsilyl chloride (35.1 mL, 278 mmol) at  $-78$   $^\circ\text{C}$  slowly over 10 min. The mixture was stirred for 30 min, LHMDS (1.3 M solution in THF, 213 mL, 278 mmol) was added slowly over 35 min. After the mixture was stirred at  $-78$   $^\circ\text{C}$  for 1 h, the cooling bath was removed and the mixture was stirred for an additional 1 h. Then the mixture was heated in an oil bath at  $50$   $^\circ\text{C}$  for 18 h. After completion of the reaction, the reaction mixture was quenched with saturated aqueous ammonium chloride. The solution was partitioned between ethyl acetate and water. The aqueous phase was extracted twice with ethyl acetate. The combined organic extracts were washed with brine, dried over sodium sulfate, filtered and concentrated under reduced pressure. The residue was purified by flash column chromatography (3 to 50% ethyl acetate/hexane) to afford **20** (23.3 g, 68.4 mmol, 73.9%, dr = 6.3:1) as a yellow oil. IR (film) 3442, 2085, 1642, 1468, 1290, 1250, 1110, 1000, 778;  $^1\text{H}$  NMR ( $\text{CDCl}_3$ )  $\delta$  5.64 (ddd,  $J = 16.8, 10.0, 9.6$  Hz 1H), 5.07 (dd,  $J = 10.0, 1.6$  Hz, 1H), 5.02 (dd,  $J = 16.8, 1.6$  Hz, 1H), 4.77 (s, 1H), 4.76 (s, 1H), 3.59 (t,  $J = 6.4$  Hz, 2H), 2.61 (dt,  $J = 9.6, 6.0$  Hz, 1H), 2.33 (dd,  $J = 10.1, 9.6$  Hz, 1H), 2.28-2.17 (m, 2H), 2.09-1.94 (m, 2H), 1.67-1.51 (m, 2H), 1.48-1.41 (m, 1H), 1.37-1.29 (m, 1H), 1.01 (t,  $J = 8.0$  Hz, 3H), 0.89 (s, 9H), 0.04 (s, 6H);  $^{13}\text{C}$  NMR ( $\text{CDCl}_3$ )  $\delta$  180.2 (C), 148.3 (C), 138.7 (CH), 117.0 ( $\text{CH}_2$ ), 109.8 ( $\text{CH}_2$ ), 62.9 ( $\text{CH}_2$ ), 48.3 (CH), 46.2 (CH), 36.4 ( $\text{CH}_2$ ), 30.4 ( $\text{CH}_2$ ), 28.6 ( $\text{CH}_2$ ), 28.4 ( $\text{CH}_2$ ), 25.9 ( $\text{CH}_3$ ), 18.3 (C), 12.2 ( $\text{CH}_3$ ),  $-5.3$  ( $\text{CH}_3$ ); HRMS (ESI-) 339.2360 (calcd for  $\text{C}_{19}\text{H}_{35}\text{O}_3\text{Si}$  339.2356).

### Primary alcohol **S3**

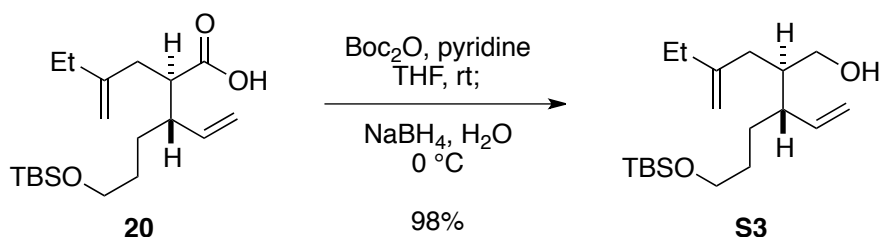

To a solution of **20** (12.4 g, 36.5 mmol) and pyridine (3.50 mL, 43.8 mmol) in THF (73.0 mL) was added di-*t*-butyl dicarbonate (8.70 g, 40.1 mmol) at room temperature, and the resulting mixture was stirred for 11 h. After completion of the reaction, the reaction mixture was added to a solution of sodium tetrahydroborate (7.60 g, 183 mmol) in water (73.0 mL) at  $0\text{ }^\circ\text{C}$ . After stirring for 2.5 h, the reaction mixture was quenched with saturated aqueous ammonium chloride. The resulting solution was extracted twice with ethyl acetate. The combined organic phases were washed with brine, dried over sodium sulfate, filtered and concentrated under reduced pressure. The residue was purified by flash column chromatography (3 to 10% ethyl acetate/hexane) to afford **S3** (11.8 g, 36.1 mmol, 98.9%) as a colorless oil. IR (film) 3436, 2931, 1640, 1317, 1251, 1098, 914, 889, 831, 779;  $^1\text{H}$  NMR ( $\text{CDCl}_3$ )  $\delta$  5.63 (ddd,  $J = 17.2, 10.1, 9.1$  Hz, 1H), 5.07 (dd,  $J = 10.1, 1.8$  Hz, 1H), 5.03 (dd,  $J = 17.2, 1.8$  Hz, 1H), 4.80 (s, 1H), 4.78 (s, 1H), 3.66-3.53 (m, 4H), 2.17-1.98 (m, 5H), 1.72 (m, 1H), 1.55 (m, 2H), 1.46 (m, 1H), 1.35 (m, 1H), 1.33 (m, 1H), 1.03 (t,  $J = 7.8$ , 3H), 0.89 (s, 9H), 0.04 (s, 6H);  $^{13}\text{C}$  NMR ( $\text{CDCl}_3$ )  $\delta$  150.4 (C), 140.7 (CH), 116.0 ( $\text{CH}_2$ ), 109.8 ( $\text{CH}_2$ ), 63.6 ( $\text{CH}_2$ ), 63.0 ( $\text{CH}_2$ ), 45.2 (CH), 42.6 (CH), 36.7 ( $\text{CH}_2$ ), 30.7 ( $\text{CH}_2$ ), 28.3 ( $\text{CH}_2$ ), 27.9 ( $\text{CH}_2$ ), 26.0 ( $\text{CH}_3$ ), 18.3 (C), 12.3 ( $\text{CH}_3$ ),  $-5.3$  ( $\text{CH}_3$ ),  $-5.3$  ( $\text{CH}_3$ ); HRMS (ESI+) 349.2547 (calcd for  $\text{C}_{19}\text{H}_{38}\text{NaO}_2\text{Si}$  349.2539).

### Benzyl ether **21**

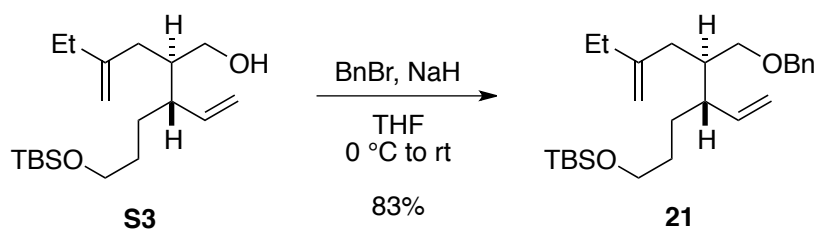

To a solution of **S3** (8.50 g, 26.0 mmol) in THF (87.0 mL) was added sodium hydride (60% in oil, 2.70 g, 67.5 mmol). The mixture was stirred for 30 min, benzyl bromide (3.70 mL, 31.2 mmol) was added at  $0\text{ }^\circ\text{C}$  slowly over 15 min. After stirring for 30 h, the reaction mixture was quenched with aqueous solution of ammonia. After stirring for 21 h, the resulting solution was extracted twice with ethyl acetate. The combined organic phases were washed with brine, dried over sodium sulfate, filtered and concentrated under reduced pressure. The residue was purified by flash column chromatography (1% diethyl ether/hexane) to afford **21** (9.03 g, 21.6 mmol, 83.0%) as a

colorless oil. IR (film) 3070, 3031, 2929, 2857, 1642, 1457, 1362, 1253, 1095, 1003, 913, 835, 776;  $^1\text{H}$  NMR ( $\text{CDCl}_3$ )  $\delta$  7.32 (m, 5H), 5.58 (ddd,  $J = 17.0, 9.9, 8.0$  Hz 1H), 5.02 (dd,  $J = 9.9, 2.0$  Hz, 1H), 4.98 (dd,  $J = 17.0, 2.0$  Hz, 1H), 4.77 (s, 1H), 4.70 (s, 1H), 4.45 (s, 2H), 3.58 (t,  $J = 6.0$  Hz, 2H), 3.44 (dd,  $J = 9.2, 5.5$  Hz, 1H), 3.31 (dd,  $J = 9.2, 6.0$  Hz, 1H), 2.21-1.96 (m, 5H), 1.86 (m, 1H), 1.57-1.29 (m, 4H), 1.02 (t,  $J = 7.6$  Hz, 3H), 0.89 (s, 9H), 0.04 (s, 6H);  $^{13}\text{C}$  NMR ( $\text{CDCl}_3$ )  $\delta$  149.8 (C), 140.3 (CH), 138.8 (C), 128.2 (CH), 127.4 (CH), 127.3 (CH), 115.9 (CH<sub>2</sub>), 109.6 (CH<sub>2</sub>), 73.0 (CH<sub>2</sub>), 70.8 (CH<sub>2</sub>), 63.2 (CH<sub>2</sub>), 44.6 (CH), 40.4 (CH), 36.3 (CH<sub>2</sub>), 31.1 (CH<sub>2</sub>), 28.3 (CH<sub>2</sub>), 27.9 (CH<sub>2</sub>), 26.0 (CH<sub>3</sub>), 18.4 (C), 12.3 (CH<sub>3</sub>), -5.2 (CH<sub>3</sub>); HRMS (ESI+) 439.3012 (calcd for  $\text{C}_{26}\text{H}_{44}\text{NaO}_2\text{Si}$  439.3008).

### Cyclopentene **22**

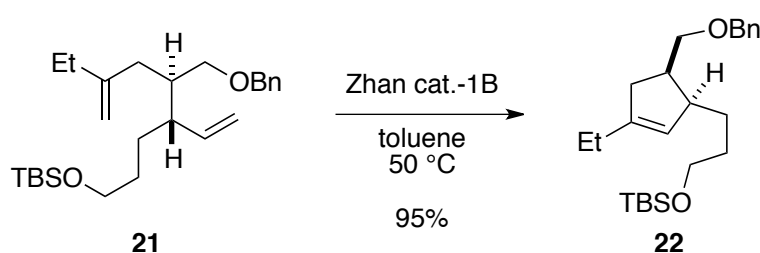

To a solution of **21** (9.00 g, 21.6 mmol) in toluene (72.0 mL) was added Zhan cat.-1B (**B**, 793 mg, 1.08 mmol), and the resulting mixture was stirred at 50 °C for 7 h. After completion of the reaction, the reaction mixture was concentrated under reduced pressure. The residue was purified by flash column chromatography (3 to 5% diethyl ether/hexane) to afford **22** (8.01 g, 20.6 mmol, 95.3%) as a colorless oil. IR (film) 3063, 3032, 2927, 2854, 1455, 1362, 1253, 1093, 1028, 834, 777;  $^1\text{H}$  NMR ( $\text{CDCl}_3$ )  $\delta$  7.33 (m, 5H), 5.37 (br d,  $J = 1.6$  Hz 1H), 4.52 (d,  $J = 12.0$  Hz, 1H), 4.49 (d,  $J = 12.0$  Hz, 1H), 3.58 (t,  $J = 6.4$  Hz, 2H), 3.54 (dd,  $J = 9.0, 6.8$  Hz, 1H), 3.40 (dd,  $J = 9.0, 7.6$  Hz, 1H), 2.63 (m, 2H), 2.26 (dd,  $J = 15.6, 7.6$  Hz, 1H), 2.09 (m, 1H), 2.05 (q,  $J = 7.6$  Hz, 2H), 1.60-1.06 (m, 4H), 1.02 (t,  $J = 7.6$  Hz, 3H), 0.89 (s, 9H), 0.04 (s, 6H);  $^{13}\text{C}$  NMR ( $\text{CDCl}_3$ )  $\delta$  145.3 (C), 138.7 (C), 128.3 (CH), 127.7 (CH), 127.4 (CH), 126.1 (CH), 73.1 (CH<sub>2</sub>), 71.1 (CH<sub>2</sub>), 63.6 (CH<sub>2</sub>), 45.7 (CH), 41.4 (CH), 37.8 (CH<sub>2</sub>), 31.5 (CH<sub>2</sub>), 26.1 (CH<sub>2</sub>), 26.0 (CH<sub>3</sub>), 24.3 (CH<sub>2</sub>), 18.4 (C), 12.3 (CH<sub>3</sub>), -5.2 (CH<sub>3</sub>); HRMS (ESI+) 411.2679 (calcd for  $\text{C}_{24}\text{H}_{40}\text{NaO}_2\text{Si}$  411.2695).

### Primary alcohol **S4**

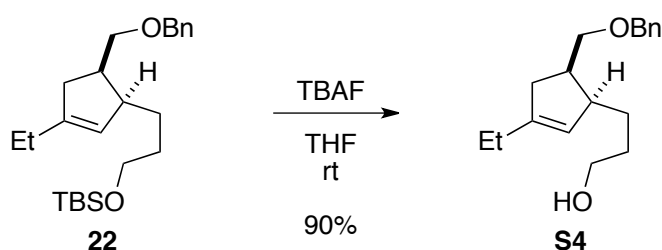

To a stirred solution of **22** (8.01 g, 20.6 mmol) in THF (41.2 mL) was added tetra-*n*-butylammonium fluoride (1.0 M solution in THF, 30.9 mL, 30.9 mmol) at room temperature. After stirring for 3 h at room temperature, the reaction was quenched with water. The solution was partitioned between ethyl acetate and water. The aqueous phase was extracted twice with ethyl acetate. The combined organic extracts were washed with brine, dried over sodium sulfate, filtered and concentrated under reduced pressure. The residue was purified by flash column chromatography (5 to 50% ethyl acetate/hexane) to afford **S4** (5.10 g, 18.6 mmol, 90.2%) as a colorless oil. IR (film) 3327, 3045, 2838, 1705, 1648, 1453, 1364, 1202, 1125, 1028, 875, 824; <sup>1</sup>H NMR (CDCl<sub>3</sub>) δ 7.37-7.27 (m, 5H), 5.37 (br d, *J* = 1.2 Hz, 1H), 4.51 (s, 2H), 3.61 (dt, *J* = 6.0, 5.5 Hz 2H), 3.55 (dd, *J* = 8.8, 6.8 Hz, 1H), 3.42 (dd, *J* = 8.8, 6.8 Hz, 1H), 2.64 (m, 2H), 2.27 (dd, *J* = 15.2, 7.6 Hz, 1H), 2.07 (m, 1H), 2.04 (q, *J* = 7.0 Hz, 2H), 1.65-1.56 (m, 2H), 1.53-1.43 (m, 2H), 1.18 (m, 1H), 1.02 (t, *J* = 7.0 Hz, 3H); <sup>13</sup>C NMR (CDCl<sub>3</sub>) δ 145.6 (C), 138.6 (C), 128.3 (CH), 127.7 (CH), 127.5 (CH), 125.9 (CH), 73.1 (CH<sub>2</sub>), 71.1 (CH<sub>2</sub>), 63.3 (CH<sub>2</sub>), 45.6 (CH), 41.4 (CH), 37.7 (CH<sub>2</sub>), 31.4 (CH<sub>2</sub>), 26.1 (CH<sub>2</sub>), 24.3 (CH<sub>2</sub>), 12.2 (CH<sub>3</sub>); HRMS (ESI+) 297.1824 (calcd for C<sub>18</sub>H<sub>26</sub>NaO<sub>2</sub> 297.1831).

### Aldehyde **23**

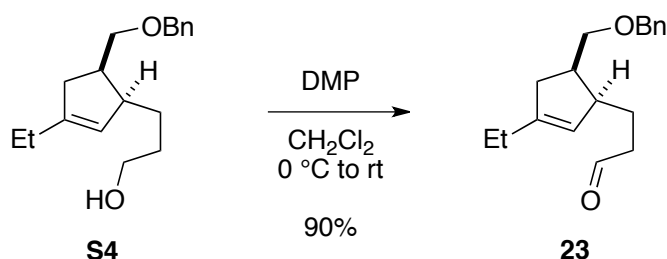

To a stirred solution of **S4** (2.50 g, 9.11 mmol) in dichloromethane (30.0 mL) was added Dess-Martin periodinane (5.80 g, 13.7 mmol) at 0 °C. After stirring for 30 min, the cooling bath was removed and the mixture was stirred for an additional 1 h. The reaction was quenched with saturated aqueous sodium thiosulfate and sodium hydrogen carbonate. The solution was partitioned between dichloromethane and water. The aqueous phase was extracted twice with dichloromethane. The combined organic extracts were washed with brine, dried over sodium sulfate, filtered and concentrated under reduced pressure. The residue was purified by flash column chromatography (10% ethyl acetate/hexane) to afford **23** (2.24 g, 8.22 mmol, 90.2%) as a colorless oil. IR (film) 3033, 2874, 2841, 2717, 1722, 1496, 1453, 1365, 1205, 1076, 1027, 912; <sup>1</sup>H NMR (CDCl<sub>3</sub>) δ 9.73 (br s, 1H), 7.37-7.27 (m, 5H), 5.32 (br s, 1H), 4.51 (s, 2H), 3.55 (dd, *J* = 8.0, 8.0 Hz, 1H), 3.45 (dd, *J* = 8.0, 6.8 Hz, 1H), 2.71-2.60 (m, 2H), 2.48-2.39 (m, 2H), 2.26 (dd, *J* = 15.6, 7.6 Hz, 1H), 2.07 (m, 1H), 2.03 (q, *J* = 7.2 Hz, 2H), 1.81 (m, 1H), 1.43 (m, 1H), 1.01 (t, *J* = 7.2 Hz, 3H); <sup>13</sup>C NMR (CDCl<sub>3</sub>) δ 202.9 (CH), 146.6 (C), 138.4 (C), 128.3 (CH), 127.7 (CH), 127.6 (CH), 125.0 (CH), 73.1 (CH<sub>2</sub>), 70.8 (CH<sub>2</sub>), 45.2 (CH), 42.6 (CH<sub>2</sub>), 41.5 (CH), 37.5 (CH<sub>2</sub>), 24.3 (CH<sub>2</sub>), 22.4 (CH<sub>2</sub>), 12.2 (CH<sub>3</sub>);

HRMS (ESI+) 295.1674 (calcd for C<sub>18</sub>H<sub>24</sub>NaO<sub>2</sub> 295.1674).

### Secondary alcohol **24**

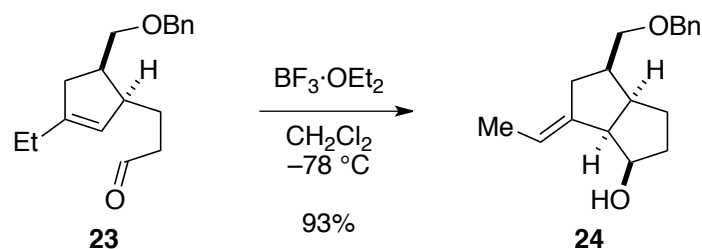

To a stirred suspension containing of **23** (2.24 g, 8.22 mmol) in dichloromethane (30.0 mL) was added BF<sub>3</sub>·OEt<sub>2</sub> (4.60 mL, 36.6 mmol) at -78 °C. After stirring for 45 min at the same temperature, the reaction was quenched with methanol at -78 °C. The solution was partitioned between dichloromethane and water. The aqueous phase was extracted twice with dichloromethane. The combined organic extracts were dried over sodium sulfate, filtered and concentrated under reduced pressure. The residue filtered by flash column chromatography (10% ethyl acetate/hexane) to afford **24** (2.09 g, 7.67 mmol, 93.3%) as a colorless oil. IR (film) 3531, 3031, 2841, 1452, 1366, 1237, 1125, 1071, 1011, 910, 785; <sup>1</sup>H NMR (CDCl<sub>3</sub>) δ 7.37-7.27 (m, 5H), 5.31 (m, 1H), 4.52 (s, 2H), 4.14 (m, 1H), 3.53 (dd, *J* = 8.9, 8.2 Hz, 1H), 3.49 (dd, *J* = 8.9, 7.4 Hz, 1H), 3.08 (dd, *J* = 8.3, 7.3 Hz, 1H), 2.62 (dddd, *J* = 8.3, 8.2, 8.2, 8.2 Hz, 1H), 2.55 (dd, *J* = 15.1, 6.4 Hz, 1H), 2.29 (dddd, *J* = 8.2, 8.2, 7.4, 6.4, 1H), 1.90 (d, *J* = 2.8 Hz, 1H), 1.76 (m, 1H), 1.68 (m, 3H), 1.65 (m, 1H), 1.56 (m, 1H), 1.51 (m, 2H); <sup>13</sup>C NMR (CDCl<sub>3</sub>) δ 142.1 (C), 138.5 (C), 128.4 (CH), 127.6 (CH), 127.5 (CH), 119.6 (CH), 73.4 (CH), 73.2 (CH<sub>2</sub>), 71.8 (CH<sub>2</sub>), 54.6 (CH), 44.8 (CH), 41.2 (CH), 36.0 (CH<sub>2</sub>), 32.8 (CH<sub>2</sub>), 23.6 (CH<sub>2</sub>), 15.1 (CH<sub>3</sub>); HRMS (ESI+) 295.1681 (calcd for C<sub>18</sub>H<sub>24</sub>NaO<sub>2</sub> 295.1674).

### Methyl ether **S5**

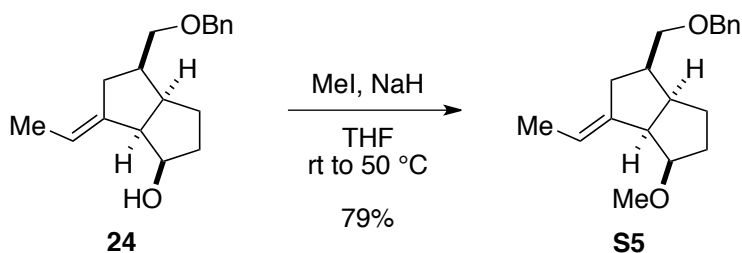

To a solution of **24** (22.6 mg, 0.0829 mmol) in THF (0.25 mL) were added sodium hydride (60% in oil, 5.0 mg, 0.124 mmol) and methyl iodide (excess amount) at room temperature. After stirring for 3 h at 50 °C, the reaction mixture was quenched with aqueous solution of ammonia. The resulting solution was extracted twice with ethyl acetate. The combined organic phases were washed with brine, dried over sodium sulfate, filtered and concentrated under reduced pressure. The residue was purified by preparative TLC separation (20% ethyl acetate/hexane) to afford **S5**



(18.9 mg, 0.0659 mmol, 79.5%) as a colorless oil. IR (film) 2921, 1453, 1365, 1201, 1094, 1004;  $^1\text{H}$  NMR ( $\text{CDCl}_3$ )  $\delta$  7.34-7.27 (m, 5H), 5.31 (m, 1H), 4.54 (d,  $J = 12.4$  Hz, 1H), 4.50 (d,  $J = 12.4$  Hz, 1H), 3.73 (ddd,  $J = 6.9, 6.4, 6.0$  Hz, 1H), 3.51 (d,  $J = 6.9$  Hz, 2H), 3.35 (s, 3H), 3.04 (m, 1H), 2.57 (dddd,  $J = 7.8, 7.4, 7.4, 7.3$  Hz, 1H), 2.50 (dd,  $J = 14.6, 7.1$  Hz, 1H), 2.29 (dddd,  $J = 12.4, 7.4, 7.1, 6.9, 6.9$  Hz, 1H), 1.76 (m, 1H), 1.64 (m, 2H), 1.61 (d,  $J = 9.6$  Hz, 3H) 1.54-1.43 (m, 2H);  $^{13}\text{C}$  NMR ( $\text{CDCl}_3$ )  $\delta$  140.8 (C), 138.6 (C), 128.3 (CH), 127.6 (CH), 127.5 (CH), 118.3 (CH), 85.1 (CH), 73.1 ( $\text{CH}_2$ ), 71.7 ( $\text{CH}_2$ ), 57.8 ( $\text{CH}_3$ ), 51.1 (CH), 42.8 (CH), 41.8 (CH), 32.9 ( $\text{CH}_2$ ), 31.4 ( $\text{CH}_2$ ), 21.8 ( $\text{CH}_2$ ), 15.2 ( $\text{CH}_3$ ); HRMS (ESI+) 309.1822 (calcd for  $\text{C}_{19}\text{H}_{26}\text{NaO}_2$  309.1831).

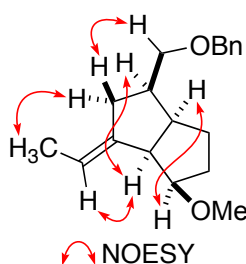

Fig. S1 NOESY correlations of **55**.

## Ketone **25**

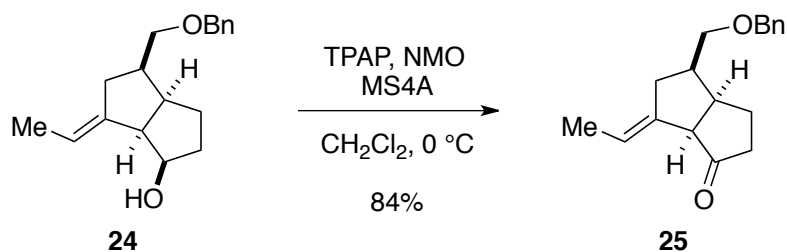

To a stirred solution of **24** (1.98 g, 7.27 mmol), NMO (2.56 g, 21.8 mmol), and MS4A (3.64 g, 0.5 g/1 mmol of **24**) in dichloromethane (24.2 mL) was added TPAP (256 mg, 0.727 mmol) at 0 °C. After stirring for 1.5 h, the mixture was filtered by flash column chromatography (20% ethyl acetate/hexane) to afford **25** (1.67 g, 6.11 mmol, 84.0%) as a colorless oil. IR (film) 3453, 3032, 2842, 1722, 1496, 1453, 1408, 1368, 1205, 1125, 1079, 1027, 912, 803;  $^1\text{H}$  NMR ( $\text{CDCl}_3$ )  $\delta$  7.39-7.29 (m, 5H), 5.56 (m, 1H), 4.56 (br d,  $J = 11.9$  Hz, 1H), 4.54 (br d,  $J = 11.9$  Hz, 1H), 3.54 (m, 2H), 3.05 (br s, 1H), 2.89 (m, 1H), 2.60-2.48 (m, 2H), 2.30 (dd,  $J = 18.3, 8.2$  Hz, 1H), 2.20 (ddd,  $J = 18.3, 12.4, 8.7$  Hz, 1H), 1.95 (m, 1H), 1.87 (m, 1H), 1.58 (dd,  $J = 7.3, 0.9$  Hz, 3H), 1.49 (m, 1H);  $^{13}\text{C}$  NMR ( $\text{CDCl}_3$ )  $\delta$  217.7 (C), 138.4 (C), 136.8 (C), 128.4 (CH), 127.7 (CH), 120.4 (CH), 73.3 ( $\text{CH}_2$ ), 70.8 ( $\text{CH}_2$ ), 57.3 (CH), 44.3 (CH), 41.1 (CH), 38.9 ( $\text{CH}_2$ ), 30.2 ( $\text{CH}_2$ ), 21.1 ( $\text{CH}_2$ ), 15.1 ( $\text{CH}_3$ ); Two CH of the benzyl group are overlapping; HRMS (ESI+) 293.1521 (calcd for  $\text{C}_{18}\text{H}_{22}\text{NaO}_2$  293.1518).

### Tertiary alcohol **27**

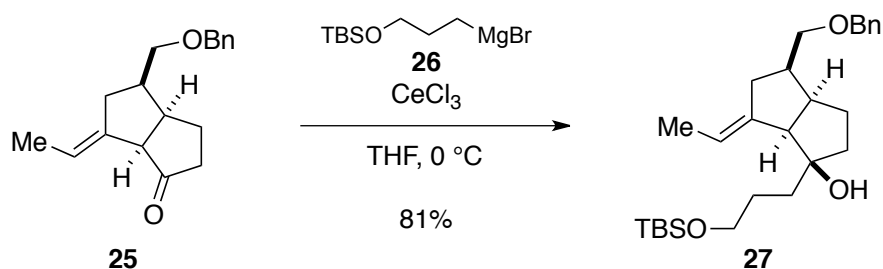

To a stirred suspension of magnesium (375 mg, 15.4 mmol) in tetrahydrofuran (20.0 mL) was added 1,2-dibromoethane (53.0 mL, 0.617 mmol) and a solution of 3-bromopropyl *tert*-butyldimethylsilyl ether (3.91 g, 15.4 mmol) in THF (10.0 mL) at room temperature. After magnesium was vanished, the mixture was added cerium chloride (0.5 M suspension in THF, 30.9 mL, 15.4 mmol) at 0 °C. After stirring for 15 min, to the resulting solution was added a solution of **25** (1.67 g, 6.17 mmol) in THF (12.3 mL) slowly over 10 min. After stirring for 45 min, the reaction was quenched with saturated aqueous ammonium chloride. The solution was partitioned between ethyl acetate and water. The aqueous phase was extracted twice with ethyl acetate. The combined organic extracts were washed with brine, dried over sodium sulfate, filtered and concentrated under reduced pressure. The residue was purified by flash column chromatography (10% ethyl acetate/hexane) to afford **27** (2.24 g, 5.04 mmol, 81.6%) as a colorless oil. IR (film) 3541, 3031, 2847, 1496, 1455, 1363, 1250, 1122, 1078, 1026, 937, 851, 781; <sup>1</sup>H NMR (CDCl<sub>3</sub>) δ 7.37-7.27 (m, 5H), 5.30 (m, 1H), 4.52 (s, 2H), 3.63 (m, 2H), 3.53 (dd, *J* = 8.8, 7.6 Hz, 1H), 3.48 (dd, *J* = 8.8, 7.2 Hz, 1H), 2.78 (d, *J* = 9.0 Hz, 1H), 2.66 (ddd, *J* = 16.5, 9.0, 8.8, 1H), 2.52 (dd, *J* = 14.6, 6.4, 1H), 2.23 (m, 1H), 1.87 (m, 1H), 1.75 (m, 3H), 1.68 (d, *J* = 6.4, 3H), 1.61 (m, 3H), 1.54 (m, 2H), 1.38 (m, 1H), 0.90 (s, 9H), 0.05 (s, 6H); <sup>13</sup>C NMR (CDCl<sub>3</sub>) δ 142.7 (C), 138.5 (C), 128.3 (CH), 127.6 (CH), 127.5 (CH), 118.8 (CH), 81.2 (C), 73.1 (CH<sub>2</sub>), 71.8 (CH<sub>2</sub>), 63.6 (CH<sub>2</sub>), 59.0 (CH), 45.6 (CH), 40.8 (CH), 39.5 (CH<sub>2</sub>), 39.1 (CH<sub>2</sub>), 32.1 (CH<sub>2</sub>), 28.1 (CH<sub>2</sub>), 25.9 (CH<sub>3</sub>), 24.6 (CH<sub>2</sub>), 18.3 (C), 15.1 (CH<sub>3</sub>), -5.3 (CH<sub>3</sub>); HRMS (ESI+) 467.2948 (calcd for C<sub>27</sub>H<sub>44</sub>NaO<sub>3</sub>Si 467.2957).

## Hydroxy ketone **S6**

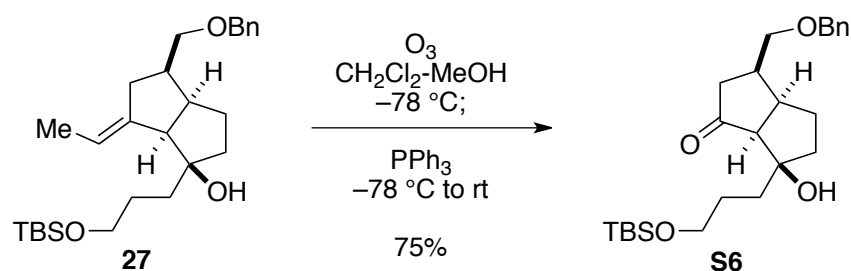

Ozone was carefully bubbled into a solution of **27** (635 mg, 1.43 mmol) in dichloromethane (5.00 mL) and methanol (5.00 mL) at  $-78\text{ }^\circ\text{C}$ . After completion of the reaction, argon was bubbled into the reaction mixture to remove remaining ozone. After addition of triphenylphosphine (446 mg, 1.71 mmol), the reaction mixture was allowed to warm up to room temperature. The solvent was removed under reduced pressure. The residue was purified by flash column chromatography (20% ethyl acetate/hexane) to afford **S6** (466.5 mg, 1.08 mmol, 75.5%) as a colorless oil. IR (film) 3497, 2953, 2856, 1728, 1457, 1364, 1254, 1096, 1009, 980, 837, 778;  $^1\text{H}$  NMR ( $CDCl_3$ )  $\delta$  7.38-7.28 (m, 5H), 4.53 (s, 2H), 3.64 (t,  $J = 6.0$  Hz, 2H), 3.56 (d,  $J = 7.4$  Hz, 2H), 2.90 (dt,  $J = 17.2, 9.2$  Hz, 1H), 2.81 (s, 1H), 2.57 (dddt,  $J = 17.2, 12.8, 7.4, 6.0$  Hz, 1H), 2.52 (d,  $J = 9.2$  Hz, 1H), 2.27 (dd,  $J = 17.6, 7.4$ , 1H), 2.17 (dd,  $J = 17.6, 12.8$ , 1H), 1.84 (m, 1H), 1.79-1.67 (m, 6H), 1.49 (m, 1H), 0.89 (s, 9H), 0.05 (s, 6H);  $^{13}\text{C}$  NMR ( $CDCl_3$ )  $\delta$  219.3 (C), 138.5 (C), 128.4 (CH), 127.7 (CH), 127.6 (CH), 82.5 (C), 73.3 ( $CH_2$ ), 71.5 ( $CH_2$ ), 63.4 ( $CH_2$ ), 62.4 (CH), 44.1 (CH), 41.3 ( $CH_2$ ), 41.2 ( $CH_2$ ), 39.7 ( $CH_2$ ), 35.7 (CH), 27.7 ( $CH_2$ ), 25.9 ( $CH_3$ ), 25.0 ( $CH_2$ ), 18.3 (C),  $-5.4$  ( $CH_3$ ); HRMS (ESI+) 455.2601 (calcd for  $C_{25}H_{40}NaO_4Si$  455.2594).

## Silyl ether **28**

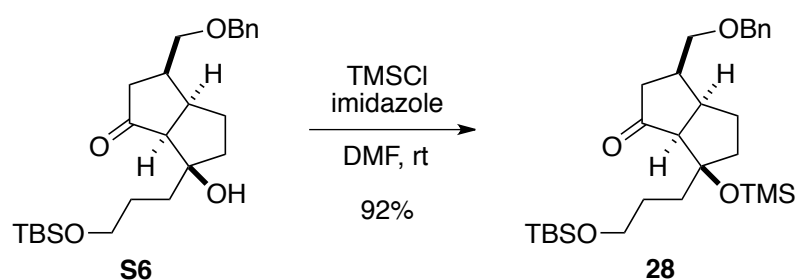

To a solution of **S6** (1.90 g, 4.39 mmol) and imidazole (598 mg, 8.78 mmol) in *N,N*-dimethylformamide (15.0 mL) was added trimethylsilyl chloride (830 mL, 6.72 mmol) at room temperature, and the resulting mixture was stirred for 1.3 h. After completion of the reaction, the solution was partitioned between ethyl acetate and water. The aqueous phase was extracted twice with ethyl acetate. The combined organic extracts were dried over sodium sulfate, filtered and concentrated under reduced pressure. The residue was purified by flash column

chromatography (10% ethyl acetate/hexane) to afford **28** (2.06 g, 4.08 mmol, 92.9%) as a colorless oil. IR (film) 2954, 2857, 1742, 1496, 1453, 1363, 1253, 1096, 1047, 839, 776;  $^1\text{H}$  NMR ( $\text{CDCl}_3$ )  $\delta$  7.36-7.28 (m, 5H), 4.53 (s, 2H), 3.64 (m, 2H), 3.56 (m, 2H), 2.83 (m, 1H), 2.51 (d,  $J = 9.6$  Hz, 1H), 2.46 (m, 1H), 2.11 (d,  $J = 10.5$ , 2H), 1.91-1.70 (m, 5H), 1.67-0.91 (m, 3H), 0.89 (s, 9H), 0.07 (s, 9H), 0.04 (s, 6H);  $^{13}\text{C}$  NMR ( $\text{CDCl}_3$ )  $\delta$  214.8 (C), 138.3 (C), 128.3 (CH), 127.6 (CH), 127.5 (CH), 87.2 (C), 73.1 ( $\text{CH}_2$ ), 71.5 ( $\text{CH}_2$ ), 63.2 ( $\text{CH}_2$ ), 61.0 (CH), 43.1 (CH), 41.8 ( $\text{CH}_2$ ), 41.4 ( $\text{CH}_2$ ), 37.5 ( $\text{CH}_2$ ), 35.4 (CH), 28.3 ( $\text{CH}_2$ ), 25.9 ( $\text{CH}_3$ ), 25.1 ( $\text{CH}_2$ ), 18.3 (C), 2.2 ( $\text{CH}_3$ ), -5.3 ( $\text{CH}_3$ ); HRMS (ESI+) 527.2981 (calcd for  $\text{C}_{28}\text{H}_{48}\text{NaO}_4\text{Si}_2$  527.2989).

### Unsaturated ketone **29**

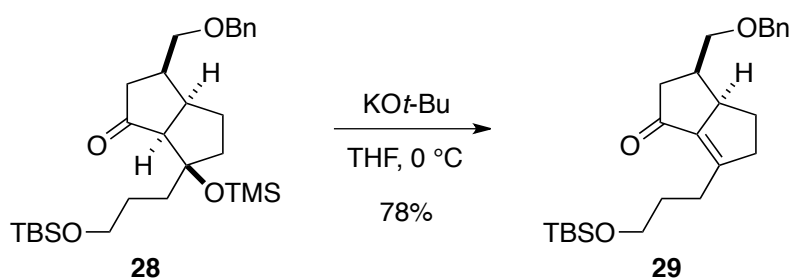

To a solution of potassium *t*-butoxide (1.0 M solution in THF, 20.0 mL, 20 mmol) was added a solution of **28** (1.00 g, 1.98 mmol) in THF (20.0 mL) at 0 °C slowly over 1 h, and the mixture was stirred for 15 min at the same temperature. After the ice bath was removed, the mixture was stirred for an additional 15 min at room temperature. After completion of the reaction, the solution was cooled to 0 °C and quenched with saturated aqueous ammonium chloride. The solution was partitioned between ethyl acetate and water. The aqueous phase was extracted twice with ethyl acetate. The combined organic extracts were dried over sodium sulfate, filtered and concentrated under reduced pressure. The residue was purified by flash column chromatography (20% ethyl acetate/hexane) to afford **29** (645 mg, 1.56 mmol, 78.7%) as a yellow oil. IR (film) 2930, 2856, 1706, 1652, 1457, 1363, 1254, 1100, 837, 776;  $^1\text{H}$  NMR ( $\text{CDCl}_3$ )  $\delta$  7.35-7.25 (m, 5H), 4.45 (s, 2H), 3.59 (t,  $J = 6.9$  Hz, 2H), 3.52 (m, 1H), 3.51 (dd,  $J = 9.2, 6.9$ , 1H), 3.27 (dd,  $J = 9.2, 6.9$ , 1H), 2.79 (m, 1H), 2.70 (dd,  $J = 17.9, 9.2$ , 1H), 2.57 (m, 1H), 2.54 (m, 1H), 2.50 (m, 1H), 2.49 (d,  $J = 17.9$ , 1H), 2.48 (m, 1H), 2.01 (dt,  $J = 12.2, 6.8$ , 1H), 1.82 (dt,  $J = 12.2, 9.2$ , 1H), 1.68 (tt,  $J = 14.7, 6.9$ , 2H), 0.89 (s, 9H), 0.04 (s, 6H);  $^{13}\text{C}$  NMR ( $\text{CDCl}_3$ )  $\delta$  202.0 (C), 154.3 (C), 138.9 (C), 138.2 (C), 128.4 (CH), 127.6 (CH), 127.6 (CH), 73.2 ( $\text{CH}_2$ ), 70.4 ( $\text{CH}_2$ ), 62.9 ( $\text{CH}_2$ ), 51.0 (CH), 48.5 ( $\text{CH}_2$ ), 41.2 ( $\text{CH}_2$ ), 35.9 (CH), 31.0 ( $\text{CH}_2$ ), 27.4 ( $\text{CH}_2$ ), 25.9 ( $\text{CH}_3$ ), 25.6 ( $\text{CH}_2$ ), 18.3 (C), -5.3 ( $\text{CH}_3$ ); HRMS (ESI+) 437.2476 (calcd for  $\text{C}_{25}\text{H}_{38}\text{NaO}_3\text{Si}$  437.2488).

### Tertiary alcohol **30**

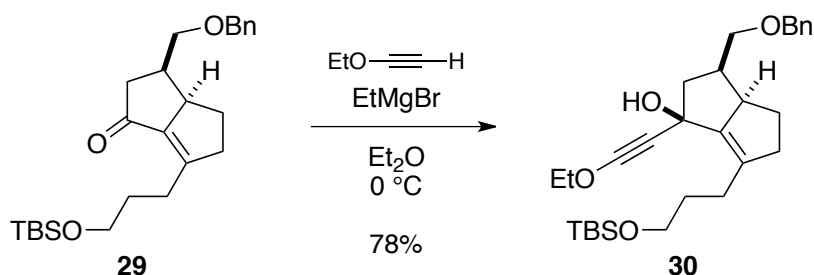

To a solution of ethoxyacetylene (40% solution in hexanes, 1.20 mL, 7.25 mmol) in diethyl ether (6.00 mL) was added ethylmagnesium bromide (3.0 M solution in diethyl ether, 1.45 mL, 4.3 mmol) at  $0\text{ }^\circ\text{C}$ . After the mixture was stirred for 15 min, a solution of **29** (600 mg, 1.45 mmol) in THF (4.00 mL) was added. After the mixture was stirred at  $0\text{ }^\circ\text{C}$  for another 45 min, the reaction was quenched with saturated aqueous ammonium chloride. The solution was partitioned between ethyl acetate and water. The aqueous phase was extracted twice with ethyl acetate. The combined organic extracts were washed with brine, dried over sodium sulfate, filtered and concentrated under reduced pressure. The residue was purified by flash column chromatography (10% ethyl acetate/hexane) to afford **30** (552 mg, 1.14 mmol, 78.6%) as a colorless oil. IR (film) 3438, 2835, 1473, 1390, 1200, 1122, 1074, 923, 859, 789;  $^1\text{H}$  NMR ( $\text{CDCl}_3$ )  $\delta$  7.34-7.23 (m, 5H), 4.46 (s, 2H), 4.06 (q,  $J = 7.2$  Hz, 2H), 3.85 (s, 1H), 3.66 (ddd,  $J = 10.6, 6.0, 5.7$  Hz, 1H), 3.57 (m, 1H), 3.56 (dd,  $J = 9.4, 6.4$  Hz, 1H), 3.50 (dd,  $J = 9.4, 4.6$  Hz, 1H), 3.27 (m, 1H), 2.62-2.35 (m, 2H), 2.52 (dd,  $J = 14.2, 7.8$  Hz, 1H), 2.38 (dd,  $J = 15.1, 8.7$  Hz, 1H), 2.27-2.15 (m, 3H), 1.84 (ddd,  $J = 11.9, 6.8, 6.6$  Hz, 1H), 1.68-1.57 (m, 3H), 1.34 (t,  $J = 7.2$  Hz, 3H), 0.91 (s, 9H), 0.08 (s, 6H);  $^{13}\text{C}$  NMR ( $\text{CDCl}_3$ )  $\delta$  150.0 (C), 138.1 (C), 133.0 (C), 128.3 (CH), 127.8 (CH), 127.6 (CH), 92.1 (C), 74.3 ( $\text{CH}_2$ ), 73.3 ( $\text{CH}_2$ ), 71.4 ( $\text{CH}_2$ ), 67.1 (C), 62.3 ( $\text{CH}_2$ ), 53.3 (CH), 53.0 ( $\text{CH}_2$ ), 41.5 (C), 39.3 ( $\text{CH}_2$ ), 36.7 (CH), 30.2 ( $\text{CH}_2$ ), 26.3 ( $\text{CH}_2$ ), 26.0 ( $\text{CH}_3$ ), 23.8 ( $\text{CH}_2$ ), 18.4 (C), 14.4 ( $\text{CH}_3$ ), -5.1 ( $\text{CH}_3$ ), -5.2 ( $\text{CH}_3$ ); HRMS (ESI+) 507.2901 (calcd for  $\text{C}_{29}\text{H}_{44}\text{NaO}_4\text{Si}$  507.2907).

### Unsaturated ester **32**

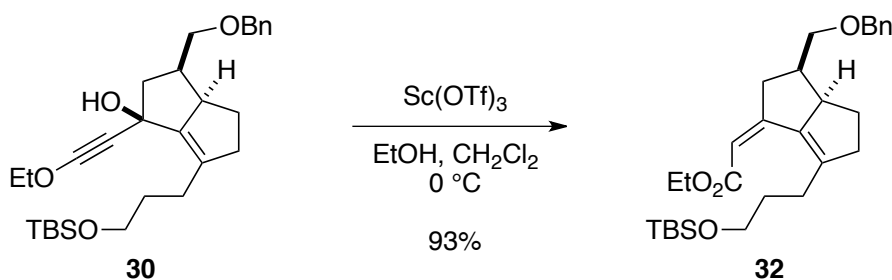

To a solution of **30** (532 mg, 1.10 mmol) in dichloromethane (3.60 mL) and ethanol (3.60 mL) was added scandium trifluoromethanesulfonate (27.1 mg, 0.0550 mmol) at  $0\text{ }^\circ\text{C}$ , and the resulting

mixture was stirred for 10 min. After completion of the reaction, the mixture was quenched with unsaturated aqueous sodium hydrogen carbonate. The solution was partitioned between ethyl acetate and water. The aqueous phase was extracted twice with ethyl acetate. The combined organic extracts were dried over sodium sulfate, filtered and concentrated under reduced pressure. The residue was purified by flash column chromatography (10% ethyl acetate/hexane) to afford **32** (501 mg, 1.03 mmol, 93.6%) as a colorless oil. IR (film) 2952, 2930, 2856, 1717, 1633, 1459, 1375, 1254, 1178, 1099, 1044;  $^1\text{H}$  NMR ( $\text{CDCl}_3$ )  $\delta$  7.36-7.28 (m, 5H), 5.67 (s, 1H), 4.46 (s, 2H), 4.14 (q,  $J = 7.1$  Hz, 2H), 3.56-3.52 (m, 2H), 3.46 (m, 1H), 3.44 (dd,  $J = 9.2, 7.4$  Hz, 1H), 3.11 (dd,  $J = 9.2, 8.2$  Hz, 1H), 2.78 (ddd,  $J = 17.8, 7.8, 2.3$  Hz, 1H), 2.76 (m, 1H), 2.59 (ddd,  $J = 17.8, 2.3, 2.3$  Hz, 1H), 2.51 (m, 1H), 2.31 (m, 1H), 2.08 (m, 2H), 1.92 (m, 1H), 1.78 (m, 1H), 1.68 (m, 1H), 1.53 (m, 1H), 1.26 (t,  $J = 7.1$  Hz, 3H), 0.89 (s, 9H), 0.04 (s, 6H);  $^{13}\text{C}$  NMR ( $\text{CDCl}_3$ )  $\delta$  166.3 (C), 151.4 (C), 146.1 (C), 138.3 (C), 138.2 (C), 128.4 (CH), 127.7 (CH), 127.6 (CH), 111.4 (CH), 73.2 ( $\text{CH}_2$ ), 71.0 ( $\text{CH}_2$ ), 63.4 ( $\text{CH}_2$ ), 59.7 ( $\text{CH}_2$ ), 53.9 (CH), 41.1 ( $\text{CH}_2$ ), 40.3 ( $\text{CH}_2$ ), 35.1 (CH), 30.2 ( $\text{CH}_2$ ), 28.1 ( $\text{CH}_2$ ), 26.0 ( $\text{CH}_3$ ), 24.4 ( $\text{CH}_2$ ), 18.3 (C), 14.4 ( $\text{CH}_3$ ), -5.3 ( $\text{CH}_3$ ), -5.3 ( $\text{CH}_3$ ); HRMS (ESI+) 507.2922 (calcd for  $\text{C}_{29}\text{H}_{44}\text{NaO}_4\text{Si}$  507.2907).

### Allyl alcohol **33**

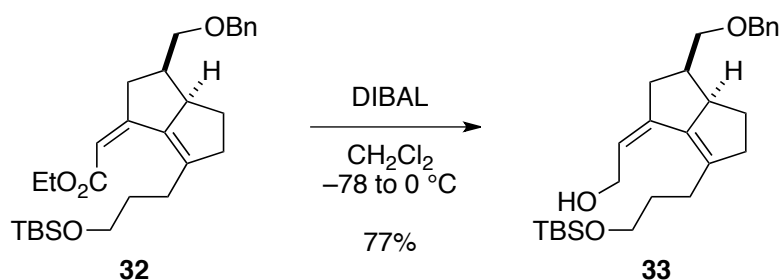

To a solution of DIBAL (1.0 M solution in toluene, 370 mL, 0.37 mmol) was added a solution of **32** (59.2 mg, 0.122 mmol) in dichloromethane (2.00 mL) at  $-78^\circ\text{C}$  slowly over 30 min, and the mixture was stirred for 30 min. After the cooling bath was removed, the mixture was stirred for an additional 30 min at  $0^\circ\text{C}$ . After completion of the reaction, the solution was quenched with saturated aqueous potassium sodium tartrate. The solution was partitioned between ethyl acetate and water. The aqueous phase was extracted twice with ethyl acetate. The combined organic extracts were dried over sodium sulfate, filtered and concentrated under reduced pressure. The residue was purified by preparative TLC separation (50% ethyl acetate/hexane) to afford **33** (41.9 mg, 0.0946 mmol, 77.5%) as a colorless oil. IR (film) 2928, 1651, 1543, 1458, 1256, 1099, 996, 935, 836;  $^1\text{H}$  NMR ( $\text{CDCl}_3$ )  $\delta$  7.36-7.27 (m, 5H), 5.39 (t,  $J = 7.3$  Hz, 1H), 4.46 (s, 2H), 4.18 (br d,  $J = 7.3$  Hz, 2H), 3.60 (m, 2H), 3.42 (dd,  $J = 8.7, 8.2$  Hz, 1H), 3.26 (m, 1H), 3.16 (dd,  $J = 8.7, 7.3$  Hz, 1H), 2.71 (dd,  $J = 15.8, 7.8$  Hz, 1H), 2.69 (m, 1H), 2.36 (d,  $J = 15.8$  Hz, 1H), 2.34 (m, 1H), 2.31 (m, 1H), 2.11 (m, 2H),

1.85 (m, 1H), 1.77 (m, 1H), 1.70 (m, 1H), 1.55 (m, 2H), 0.90 (s, 9H), 0.06 (s, 6H);  $^{13}\text{C}$  NMR ( $\text{CDCl}_3$ )  $\delta$  139.5 (C), 138.5 (C), 137.8 (C), 136.3 (C), 128.3 (CH), 127.7 (CH), 127.5 (CH), 120.5 (CH), 73.1 ( $\text{CH}_2$ ), 71.6 ( $\text{CH}_2$ ), 63.2 ( $\text{CH}_2$ ), 61.9 ( $\text{CH}_2$ ), 54.1 (CH), 40.5 ( $\text{CH}_2$ ), 39.8 ( $\text{CH}_2$ ), 35.3 (CH), 31.3 ( $\text{CH}_2$ ), 27.1 ( $\text{CH}_2$ ), 26.0 ( $\text{CH}_3$ ), 25.5 ( $\text{CH}_2$ ), 18.5 (C),  $-5.3$  ( $\text{CH}_3$ ),  $-5.3$  ( $\text{CH}_3$ ); HRMS (ESI+) 465.2794 (calcd for  $\text{C}_{27}\text{H}_{42}\text{NaO}_3\text{Si}$  465.2801).

The geometry of the trisubstituted olefin moiety was determined by a NOESY experiment of a related compound.

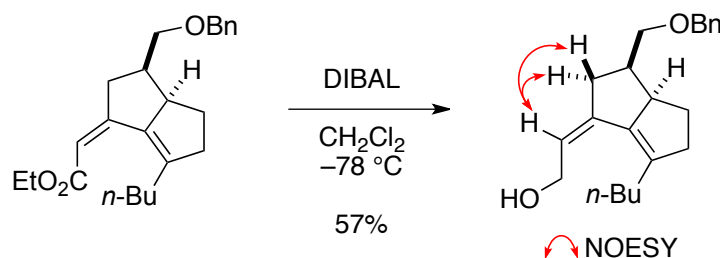

### MOM ether **37**

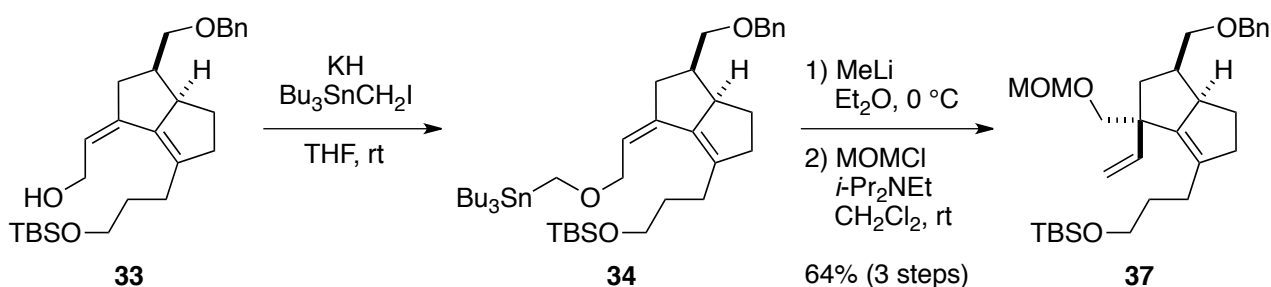

To a suspension of potassium hydride (30% in oil, 20.5 mg, 0.153 mmol) in THF (300 mL) were added a solution of **33** (64.6 mg, 0.153 mmol) in THF (300 mL) and a solution of  $\text{Bu}_3\text{SnCH}_2\text{I}$  (65.9 mg, 0.153 mmol) in THF (300 mL) at 0 °C, and the resulting mixture was stirred for 4 h at room temperature. After completion of the reaction, the solution was quenched at 0 °C carefully with water and partitioned between ethyl acetate and water. The organic extract was dried over sodium sulfate, filtered and concentrated under reduced pressure. The residue was filtered with silica gel (0 to 100 % ethyl acetate/hexane) and concentrated under reduced pressure to afford **34** as a colorless oil (120 mg). This oil was used for the next step without further purification. To a solution of methyllithium (1.17 M solution in diethyl ether, 280 mL, 0.322 mmol) was added a solution of **34** in diethyl ether (600 mL) at 0 °C slowly over 5 min. After the mixture was stirred for 1 h at the same temperature. The reaction mixture was quenched with saturated aqueous ammonium chloride. The solution was partitioned between ethyl acetate and water. The aqueous phase was extracted twice with ethyl acetate. The combined organic extracts were dried over sodium sulfate, filtered and concentrated under reduced pressure to afford alcohol **36** as a

colorless oil (100 mg), which was used for the next step without further purification. To a solution of **36** in dichloromethane (1.00 mL) was added *N,N*-diisopropylethylamine (69.0 mL, 0.400 mmol) and chloromethyl methyl ether (24.0 mL, 0.300 mmol), and the resulting mixture was stirred for 2 h at room temperature. After completion of the reaction, the solution was quenched with saturated aqueous ammonium chloride, and partitioned between ethyl acetate and water. The organic extract was dried over sodium sulfate, filtered and concentrated under reduced pressure. The residue was purified by preparative TLC separation (25% ethyl acetate/hexane) to afford **37** (49.5 mg, 0.0988 mmol, 64.5% for 3 steps) as a colorless oil. IR (film) 2929, 2856, 1459, 1364, 1255, 1149, 1103, 1046, 919, 836, 774;  $^1\text{H}$  NMR ( $\text{CDCl}_3$ )  $\delta$  7.36-7.27 (m, 5H), 5.95 (dd,  $J = 17.4, 10.8$  Hz, 1H), 5.08 (br d,  $J = 17.4$  Hz, 1H), 5.00 (br d,  $J = 10.8$  Hz, 1H), 4.61 (s, 2H), 4.48 (d,  $J = 11.5$  Hz, 1H), 4.43 (d,  $J = 11.5$  Hz, 1H), 3.56 (t,  $J = 7.3$  Hz, 2H), 3.55 (d,  $J = 8.0$  Hz, 1H), 3.45 (d,  $J = 8.0$  Hz, 1H), 3.43 (dd,  $J = 8.9, 6.4$  Hz, 1H), 3.34 (s, 3H), 3.24 (m, 1H), 3.22 (dd,  $J = 8.9, 7.4$  Hz, 1H), 2.55 (m, 1H), 2.35 (dd,  $J = 15.1, 8.7$  Hz, 1H), 2.24 (m, 1H), 2.20 (dd,  $J = 12.6, 7.3$  Hz, 1H), 2.13 (m, 2H), 2.04 (d,  $J = 12.6$  Hz, 1H), 1.82 (ddd,  $J = 11.9, 6.9, 6.9$  Hz, 1H), 1.59-1.49 (m, 3H), 0.89 (s, 9H), 0.04 (s, 6H);  $^{13}\text{C}$  NMR ( $\text{CDCl}_3$ )  $\delta$  145.7 (C), 142.7 (CH), 138.6 (C), 134.1 (C), 128.3 (CH), 127.7 (CH), 127.4 (CH), 112.1 ( $\text{CH}_2$ ), 96.6 ( $\text{CH}_2$ ), 73.1 ( $\text{CH}_2$ ), 73.1 ( $\text{CH}_2$ ), 71.4 ( $\text{CH}_2$ ), 63.4 ( $\text{CH}_2$ ), 55.2 ( $\text{CH}_3$ ), 55.0 (CH), 46.8 (C), 43.1 ( $\text{CH}_2$ ), 39.9 ( $\text{CH}_2$ ), 37.3 (CH), 31.6 ( $\text{CH}_2$ ), 26.0 ( $\text{CH}_3$ ), 25.5 ( $\text{CH}_2$ ), 25.3 ( $\text{CH}_2$ ), 18.3 (C), -5.3 ( $\text{CH}_3$ ); HRMS (ESI+) 523.3194 (calcd for  $\text{C}_{30}\text{H}_{48}\text{NaO}_4\text{Si}$  523.3220).

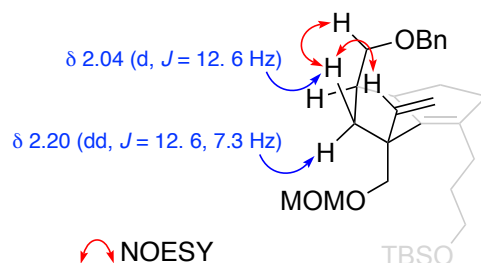

Fig. S2 NOESY correlations and selected coupling constants of **37**.

### Primary alcohol **S7**

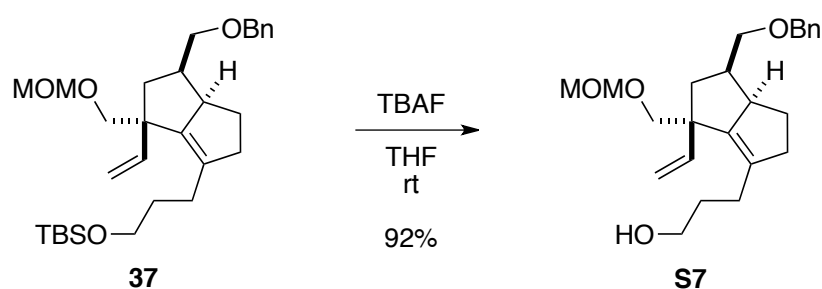

To a stirred solution of **37** (49.5 mg, 0.0988 mmol) in tetrahydrofuran (300 mL) was added



tetra-*n*-butylammonium fluoride (1.0 M solution in THF, 150 mL, 0.150 mmol) at room temperature. After stirring for 2 h at room temperature, the reaction was quenched with water. The solution was partitioned between ethyl acetate and water. The aqueous phase was extracted twice with ethyl acetate. The combined organic extracts were washed with brine, dried over sodium sulfate, filtered and concentrated under reduced pressure. The residue was purified by preparative TLC separation (50% ethyl acetate/hexane) to afford **S7** (35.5 mg, 0.0918 mmol, 92.9%) as a colorless oil. IR (film) 3436, 2935, 2861, 1634, 1452, 1368, 1211, 1149, 1106, 1044, 916; <sup>1</sup>H NMR (CDCl<sub>3</sub>) δ 7.34-7.27 (m, 5H), 5.95 (dd, *J* = 17.4, 10.6 Hz, 1H), 5.10 (dd, *J* = 17.4, 0.9 Hz, 1H), 5.05 (dd, *J* = 10.6, 0.9 Hz, 1H), 4.63 (d, *J* = 6.9 Hz, 1H), 4.61 (d, *J* = 6.9 Hz, 1H), 4.48 (d, *J* = 11.9 Hz, 1H), 4.44 (d, *J* = 11.9 Hz, 1H), 3.55 (s, 2H), 3.54 (m, 2H), 3.45 (dd, *J* = 8.7, 7.6 Hz, 1H), 3.35 (s, 3H), 3.28 (m, 1H), 3.24 (dd, *J* = 9.2, 7.6 Hz, 1H), 2.58 (m, 1H), 2.43 (ddd, *J* = 14.2, 7.8, 7.3 Hz, 1H), 2.32-2.24 (m, 2H), 2.10 (m, 1H), 2.07 (dd, *J* = 13.8, 7.4 Hz, 1H), 1.90 (dd, *J* = 13.8, 3.7 Hz, 1H), 1.86 (m, 1H), 1.68-1.52 (m, 3H); <sup>13</sup>C NMR (CDCl<sub>3</sub>) δ 146.4 (C), 142.5 (CH), 138.5 (C), 133.9 (C), 128.3 (CH), 127.7 (CH), 127.5 (CH), 112.4 (CH<sub>2</sub>), 96.6 (CH<sub>2</sub>), 73.1 (CH<sub>2</sub>), 72.4 (CH<sub>2</sub>), 71.5 (CH<sub>2</sub>), 61.7 (CH<sub>2</sub>), 55.4 (CH<sub>3</sub>), 54.2 (CH), 47.1 (C), 43.5 (CH<sub>2</sub>), 39.6 (CH<sub>2</sub>), 36.7 (CH), 30.4 (CH<sub>2</sub>), 25.7 (CH<sub>2</sub>), 24.9 (CH<sub>2</sub>); HRMS (ESI+) 409.2355 (calcd for C<sub>24</sub>H<sub>34</sub>NaO<sub>4</sub> 409.2355).

### Triene 38

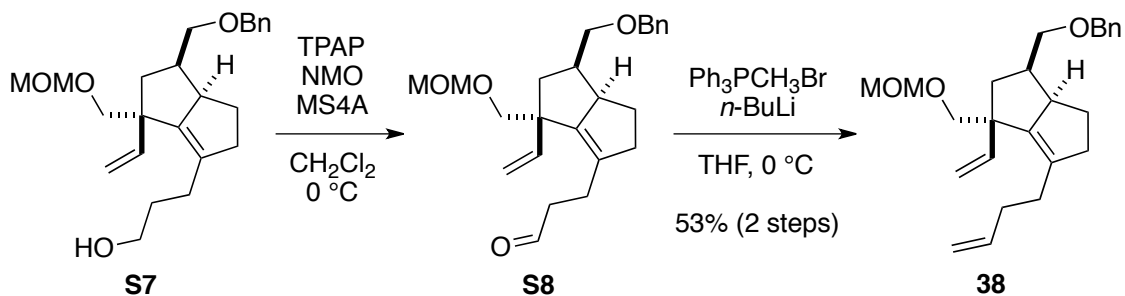

To a suspension of alcohol **S7** (10 mg, 0.028 mmol) and MS4A (14 mg, 0.5 g/1 mmol of **S7**) in dichloromethane (0.25 mL) were added TPAP (1.0 mg, 0.0028 mmol) and NMO (10 mg, 0.085 mmol) at 0 °C. After completion of the reaction, the resulting solution was filtered over silica gel and concentrated under reduced pressure to afford **S8** as an oil, which was used for the next step without further purification. To a suspension of methyltriphenylphosphonium bromide (39 mg, 0.11 mmol) in THF (0.25 mL) was added *n*-butyllithium (2.4 M solution in *n*-hexane, 9.0 mL, 0.11 mmol) at 0 °C. After 15 minutes, to the resulting solution was added a solution of aldehyde **S8** (8.4 mg, 0.022 mmol) in THF (0.25 mL) at 0 °C. After completion of the reaction, the solution was partitioned between ethyl acetate and aqueous solution of ammonium chloride. The aqueous phase was extracted twice with ethyl acetate. The combined organic extracts were dried over sodium sulfate, filtered and concentrated under reduced pressure. The residue was purified by

preparative TLC separation (20% ethyl acetate/hexane) to afford **38** (5.9 mg, 0.015 mmol, 53% for 2 steps) as a colorless oil. IR (film) 2928, 2844, 1638, 1452, 1367, 1211, 1149, 1106, 1043, 913;  $^1\text{H}$  NMR ( $\text{CDCl}_3$ )  $\delta$  7.34-7.26 (m, 5H), 5.94 (dd,  $J = 17.2, 10.8$  Hz, 1H), 5.78 (ddt,  $J = 17.2, 10.7, 6.4$  Hz, 1H), 5.08 (dd,  $J = 17.2, 1.4$  Hz, 1H), 5.01 (dd,  $J = 10.8, 1.4$  Hz, 1H), 4.99 (dd,  $J = 17.2, 1.1$  Hz, 1H), 4.92 (dd,  $J = 10.7, 1.1$  Hz, 1H), 4.61 (s, 2H), 4.48 (d,  $J = 11.9$  Hz, 1H), 4.43 (d,  $J = 11.9$  Hz, 1H), 3.55 (d,  $J = 9.2$  Hz, 1H), 3.47 (d,  $J = 9.2$  Hz, 1H), 3.45 (dd,  $J = 9.2, 9.0$  Hz, 1H), 3.34 (s, 3H), 3.26 (m, 1H), 3.23 (dd,  $J = 9.0, 7.3$  Hz, 1H), 2.55 (m, 1H), 2.35 (dd,  $J = 14.6, 8.7$  Hz, 1H), 2.29-2.19 (m, 4H), 2.12-2.08 (m, 2H), 2.03 (d,  $J = 13.3$  Hz, 1H), 1.82 (ddd,  $J = 11.9, 6.9, 6.2$  Hz, 1H), 1.53 (m, 1H);  $^{13}\text{C}$  NMR ( $\text{CDCl}_3$ )  $\delta$  146.1 (C), 142.7 (CH), 138.8 (CH), 138.5 (C), 133.8 (CH), 128.3 (CH), 127.7 (CH), 127.5 (CH), 114.3 ( $\text{CH}_2$ ), 112.1 ( $\text{CH}_2$ ), 96.7 ( $\text{CH}_2$ ), 73.2 ( $\text{CH}_2$ ), 73.1 ( $\text{CH}_2$ ), 71.3 ( $\text{CH}_2$ ), 55.2 (CH), 55.0 (CH), 46.8 (C), 43.3 ( $\text{CH}_2$ ), 39.8 ( $\text{CH}_2$ ), 37.3 ( $\text{CH}_3$ ), 32.5 ( $\text{CH}_2$ ), 28.5 ( $\text{CH}_2$ ), 25.5 ( $\text{CH}_2$ ); HRMS (ESI+) 405.2414 (calcd for  $\text{C}_{25}\text{H}_{34}\text{NaO}_3$  405.2405).

### Tricyclic compound 39

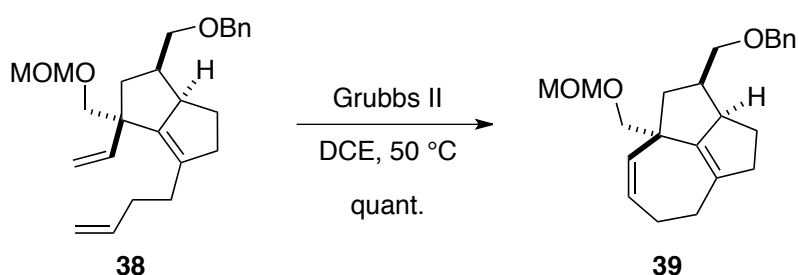

To a solution of **38** (5.4 mg, 0.014 mmol) in 1,2-dichloroethane (0.25 mL) was added Grubbs 2nd catalyst (0.4 mg, 0.0017 mmol), and the resulting mixture was stirred at 50 °C for 25 min. After completion of the reaction, the reaction mixture was concentrated under reduced pressure. The residue was purified by preparative TLC separation (25% ethyl acetate/hexane) to afford **39** (4.8 mg, 100%) as a colorless oil. IR (film) 2927, 2853, 1452, 1364, 1149, 1107, 1043;  $^1\text{H}$  NMR ( $\text{CDCl}_3$ )  $\delta$  7.36-7.27 (m, 5H), 5.77 (ddd,  $J = 11.0, 8.3, 5.5$  Hz, 1H), 5.62 (dd,  $J = 11.0, 2.3$  Hz, 1H), 4.61 (s, 2H), 4.47 (s, 2H), 3.61 (d,  $J = 9.2$  Hz, 1H), 3.47 (d,  $J = 9.2$  Hz, 1H), 3.41 (dd,  $J = 8.7, 8.7$  Hz, 1H), 3.35 (m, 1H), 3.34 (s, 3H), 3.27 (dd,  $J = 8.7, 6.4$  Hz, 1H), 2.62-2.51 (m, 2H), 2.42 (m, 1H), 2.24 (m, 1H), 2.23 (m, 1H), 2.11 (m, 2H), 2.04 (m, 1H), 1.91 (ddd,  $J = 12.6, 6.9, 6.4$  Hz, 1H), 1.62 (dddd,  $J = 12.6, 9.6, 9.2, 9.2$  Hz, 1H), 1.44 (dd,  $J = 13.1, 7.8$  Hz, 1H);  $^{13}\text{C}$  NMR ( $\text{CDCl}_3$ )  $\delta$  144.0 (C), 138.6 (C), 136.9 (CH), 136.4 (C), 129.3 (CH), 128.3 (CH), 127.7 (CH), 127.5 (CH), 96.5 ( $\text{CH}_2$ ), 73.1 ( $\text{CH}_2$ ), 72.3 ( $\text{CH}_2$ ), 72.1 ( $\text{CH}_2$ ), 55.1 ( $\text{CH}_3$ ), 52.1 (CH), 46.9 (C), 43.9 ( $\text{CH}_2$ ), 40.3 ( $\text{CH}_2$ ), 35.7 (CH), 28.3 ( $\text{CH}_2$ ), 26.2 ( $\text{CH}_2$ ), 25.3 ( $\text{CH}_2$ ); HRMS (ESI+) 377.2081 (calcd for  $\text{C}_{23}\text{H}_{30}\text{NaO}_3$  377.2093).

## Isoxazoline 41

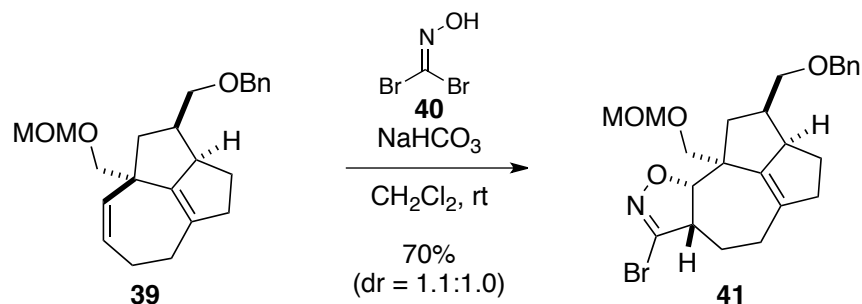

To a suspension of tricyclic compound **39** (7.0 mg, 0.0197 mmol) and sodium hydrogen carbonate (10.0 mg) in dichloromethane (0.30 mL) were added oxime **40** (12.0 mg, 0.0592 mmol) and the resulting mixture was stirred at room temperature for 48 h. The reaction was quenched with saturated aqueous ammonium chloride. The solution was partitioned between dichloromethane and water. The aqueous phase was extracted twice with dichloromethane. The combined organic extracts were dried over sodium sulfate, filtered and concentrated under reduced pressure. The residue was purified by preparative TLC separation (20% ethyl acetate/hexane) to afford **41** (3.4 mg, 0.00714 mmol, 36%) and its diastereomer (3.2 mg, 0.00671 mmol, 34%) as a colorless oil respectively. Less polar isomer (**41**): IR (film) 2919, 2853, 1719, 1453, 1404, 1280, 1110, 1042, 914;  $^1\text{H}$  NMR ( $\text{CDCl}_3$ )  $\delta$  7.36-7.28 (m, 5H), 4.60 (d,  $J = 11.6$ , 1H), 4.55 (s, 2H), 4.48 (d,  $J = 11.9$ , 1H), 4.41 (d,  $J = 11.9$ , 1H), 3.58 (d,  $J = 9.8$ , 1H), 3.48 (d,  $J = 9.8$ , 1H), 3.42-3.33 (m, 3H), 3.31 (s, 3H), 3.26 (dd,  $J = 9.2, 5.5$  Hz, 1H), 2.60 (m, 1H), 2.34 (m, 1H), 2.26 (m, 3H), 2.22 (m, 1H), 2.01 (m, 1H), 1.95 (m, 2H), 1.88 (dddd,  $J = 13.1, 8.5, 8.5, 1.6$  Hz, 1H), 1.65 (ddd,  $J = 18.5, 13.1, 9.4$  Hz, 1H);  $^{13}\text{C}$  NMR ( $\text{CDCl}_3$ )  $\delta$  143.8 (C), 143.6 (C), 138.4 (C), 135.0 (C), 128.4 (CH), 127.8 (CH), 127.6 (CH), 96.6 ( $\text{CH}_2$ ), 88.8 (CH), 73.1 ( $\text{CH}_2$ ), 71.6 ( $\text{CH}_2$ ), 70.4 ( $\text{CH}_2$ ), 55.3 ( $\text{CH}_3$ ), 54.4 (CH), 53.8 (CH), 46.9 (C), 44.4 ( $\text{CH}_2$ ), 41.2 ( $\text{CH}_2$ ), 36.9 (CH), 28.1 ( $\text{CH}_2$ ), 24.8 ( $\text{CH}_2$ ), 24.2 ( $\text{CH}_2$ ); HRMS (ESI+) 498.1248 (calcd for  $\text{C}_{24}\text{H}_{30}\text{BrNNaO}_4$  498.1256). More polar isomer: IR (film) 2919, 1454, 1404, 1150, 1105, 1041, 917;  $^1\text{H}$  NMR ( $\text{CDCl}_3$ )  $\delta$  7.36-7.28 (m, 5H), 4.80 (d,  $J = 9.8$  Hz, 1H), 4.61 (s, 2H), 4.51 (d,  $J = 11.6$ , 1H), 4.46 (d,  $J = 11.6$ , 1H), 3.67 (d,  $J = 9.8$ , 1H), 3.53-3.38 (m, 3H), 3.36 (s, 3H), 3.34-3.30 (m, 2H), 2.50 (m, 1H), 2.31 (m, 2H), 2.20 (m, 2H), 2.07 (m, 2H), 1.98 (m, 1H), 1.86 (m, 2H), 1.76 (ddd,  $J = 17.8, 12.8, 8.7$ , 1H);  $^{13}\text{C}$  NMR ( $\text{CDCl}_3$ )  $\delta$  143.2 (C), 141.0 (C), 138.7 (C), 137.1 (C), 128.3 (CH), 127.8 (CH), 127.4 (CH), 96.6 ( $\text{CH}_2$ ), 86.8 (CH), 73.2 ( $\text{CH}_2$ ), 72.4 ( $\text{CH}_2$ ), 71.9 ( $\text{CH}_2$ ), 55.5 ( $\text{CH}_3$ ), 53.6 (CH), 53.2 (CH), 46.4 (C), 40.8 ( $\text{CH}_2$ ), 40.5 ( $\text{CH}_2$ ), 36.0 (CH), 25.5 ( $\text{CH}_2$ ), 25.0 ( $\text{CH}_2$ ), 24.8 ( $\text{CH}_2$ ); HRMS (ESI+) 498.1274 (calcd for  $\text{C}_{24}\text{H}_{30}\text{BrNNaO}_4$  498.1256).

## Aminoalcohol 42

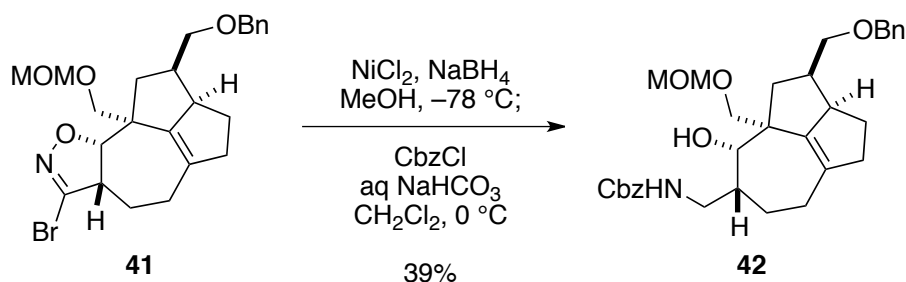

To a solution of isoxazoline **41** (less polar isomer, 5.2 mg, 0.0109 mmol) in methanol (0.3 mL) were added nickel chloride (8.2 mg, 0.0633 mmol) and sodium tetrahydroborate (11.2 mg, 0.266 mmol) at  $-78\text{ }^{\circ}\text{C}$ . After completion of the reaction, the reaction mixture were added dichloromethane (0.2 mL), aqueous sodium hydrogen carbonate (0.2 mL), and benzyl chloroformate (25 mL, 0.177 mmol) at  $0\text{ }^{\circ}\text{C}$ . After stirring for 1.5 h, the reaction mixture was quenched with saturated aqueous ammonium chloride. The resulting solution was extracted twice with ethyl acetate. The combined organic phases were dried over sodium sulfate, filtered and concentrated under reduced pressure. The residue was purified by preparative TLC separation (50% ethyl acetate/hexane) to afford **42** (2.3 mg, 0.0043 mmol, 39%) as a colorless oil. IR (film) 3349, 2923, 2858, 1720, 1518, 1448, 1250, 1108, 1038;  $^1\text{H}$  NMR ( $\text{CDCl}_3$ )  $\delta$  7.35-7.27 (m, 10H), 5.36 (t,  $J = 5.7\text{ Hz}$ , 1H), 5.08 (s, 2H), 4.63 (d,  $J = 6.6\text{ Hz}$ , 1H), 4.60 (d,  $J = 6.6\text{ Hz}$ , 1H), 4.46 (s, 2H), 3.83 (dd,  $J = 5.5, 4.8\text{ Hz}$ , 1H), 3.75 (d,  $J = 9.8\text{ Hz}$ , 1H), 3.54 (d,  $J = 9.8\text{ Hz}$ , 1H), 3.48 (d,  $J = 5.5\text{ Hz}$ , 1H), 3.42-3.33 (m, 2H), 3.37 (s, 3H), 3.30-3.23 (m, 3H), 2.53 (m, 1H), 2.37 (m, 1H), 2.34 (d,  $J = 11.9\text{ Hz}$ , 1H), 2.24-2.17 (m, 2H), 2.10-1.97 (m, 2H), 1.90 (ddd,  $J = 12.4, 7.8, 5.2\text{ Hz}$ , 1H), 1.79 (m, 1H), 1.66-1.59 (m, 2H), 1.40 (dd,  $J = 11.9, 6.9\text{ Hz}$ , 1H);  $^{13}\text{C}$  NMR ( $\text{CDCl}_3$ )  $\delta$  156.6 (C), 143.4 (C), 138.4 (C), 136.8 (C), 136.3 (C), 128.5 (CH), 128.4 (CH), 128.1 (CH), 128.0 (CH), 127.8 (CH), 127.6 (CH), 96.8 ( $\text{CH}_2$ ), 78.4 (CH), 73.2 ( $\text{CH}_2$ ), 72.0 ( $\text{CH}_2$ ), 70.9 ( $\text{CH}_2$ ), 66.5 ( $\text{CH}_2$ ), 55.8 ( $\text{CH}_3$ ), 52.0 (CH), 49.2 (C), 44.3 ( $\text{CH}_2$ ), 43.0 ( $\text{CH}_2$ ), 41.9 (CH), 40.8 ( $\text{CH}_2$ ), 35.0 (CH), 27.2 ( $\text{CH}_2$ ), 27.0 ( $\text{CH}_2$ ), 25.8 ( $\text{CH}_2$ ); HRMS (ESI+) 558.2843 (calcd for  $\text{C}_{32}\text{H}_{41}\text{NNaO}_6$  558.2831).

## References

- 1 R. R. Sicinski, K. L. Perlman and H. F. DeLuca, *J. Med. Chem.*, 1994, **37**, 3730.
- 2 G. Bélanger, V. Darsigny, M. Doré and F. Lévesque, *Org. Lett.*, 2010, **12**, 1396.
- 3 L. Leng, X. Zhou, Q. Liao, F. Wang, H. Song, D. Zhang, X.-Y. Liu and Y. Qin, *Angew. Chem. Int. Ed.*, 2017, **56**, 3703.
- 4 (a) T. Imamoto, T. Kusumoto, Y. Tawarayama, Y. Sugiura, T. Mita, Y. Hatanaka and M. Yokoyama, *J. Org. Chem.*, 1984, **49**, 3904. (b) N. Takeda and T. Imamoto, *Org. Synth.*, 1999, **76**, 228.

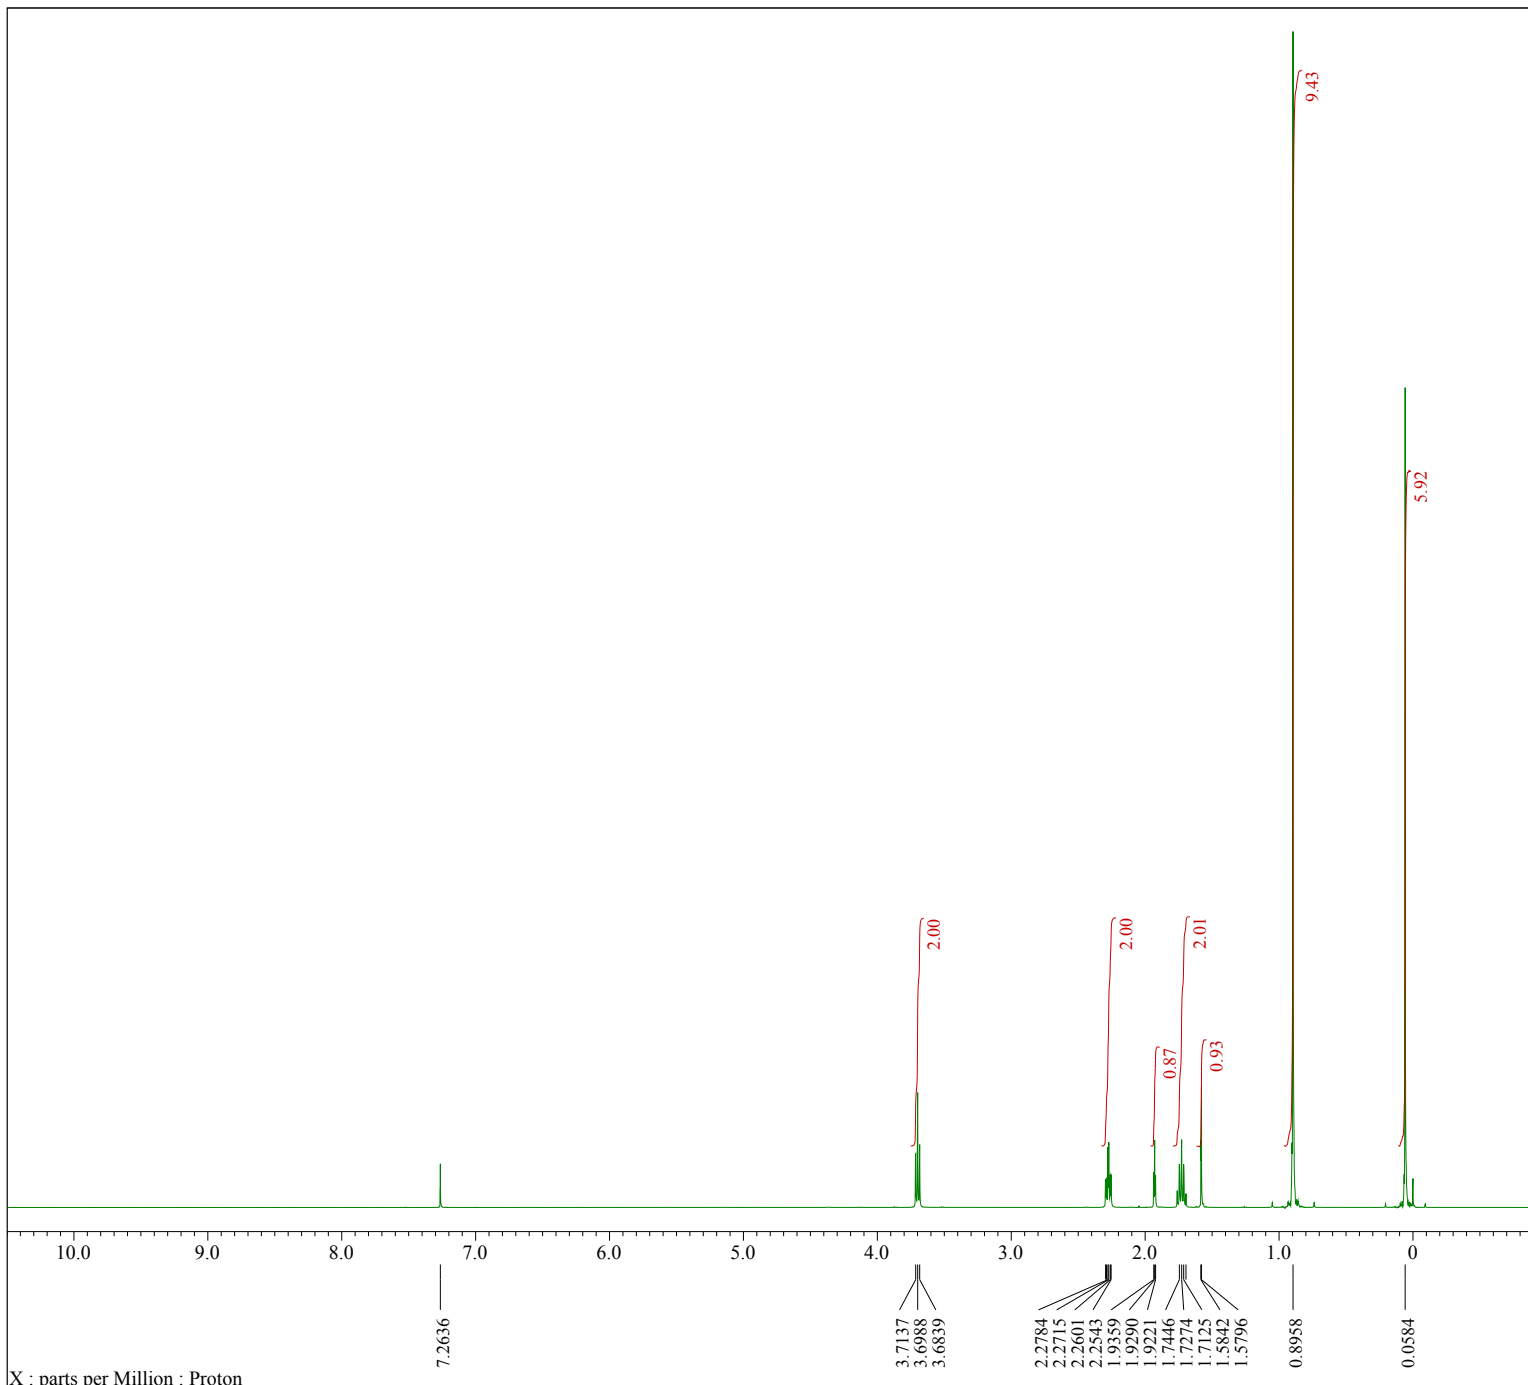

```

Filename      = yk05352data_non-data-2-
Author        = delta
Experiment    = single_pulse.jxp
Sample_Id     = yk05352data
Solvent       = CHLOROFORM-D
Creation Time = 4-SEP-2016 18:58:48
Revision Time = 20-FEB-2018 19:28:26
Current Time  = 20-FEB-2018 19:29:15

Data Format    = 1D COMPLEX
Dim_Size      = 13107
Dim_Title     = Proton
Dim_Units     = [ppm]
Dimensions    = X
Site          = JNM-ECS400
Spectrometer  = DELTA2_NMR

Field Strength = 9.389766[T] (400[MHz])
X_Acq_Duration = 2.18365952[s]
X_Domain      = 1H
X_Freq        = 399.78219838[MHz]
X_Offset      = 5[ppm]
X_Points      = 16384
X_Prescans    = 1
X_Resolution  = 0.45794685[Hz]
X_Sweep       = 7.5030012[kHz]
X_Sweep_Clippped = 6.00240096[kHz]
Irr_Domain    = Proton
Irr_Freq      = 399.78219838[MHz]
Irr_Offset    = 5[ppm]
Tri_Domain    = Proton
Tri_Freq      = 399.78219838[MHz]
Tri_Offset    = 5[ppm]
Clipped       = FALSE
Scans         = 8
Total_Scans   = 8

Relaxation_Delay = 5[s]
Recvr_Gain       = 36
Temp_Get         = 23.9[dC]
X_90_Width      = 10.025[us]
X_Acq_Time      = 2.18365952[s]
X_Angle         = 45[deg]
X_Atn           = 1[dB]
X_Pulse         = 5.0125[us]
Irr_Mode        = Off
Tri_Mode        = Off
DanTe_Presat   = FALSE
Initial_Wait    = 1[s]
Repetition Time = 7.18365952[s]
  
```

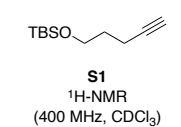

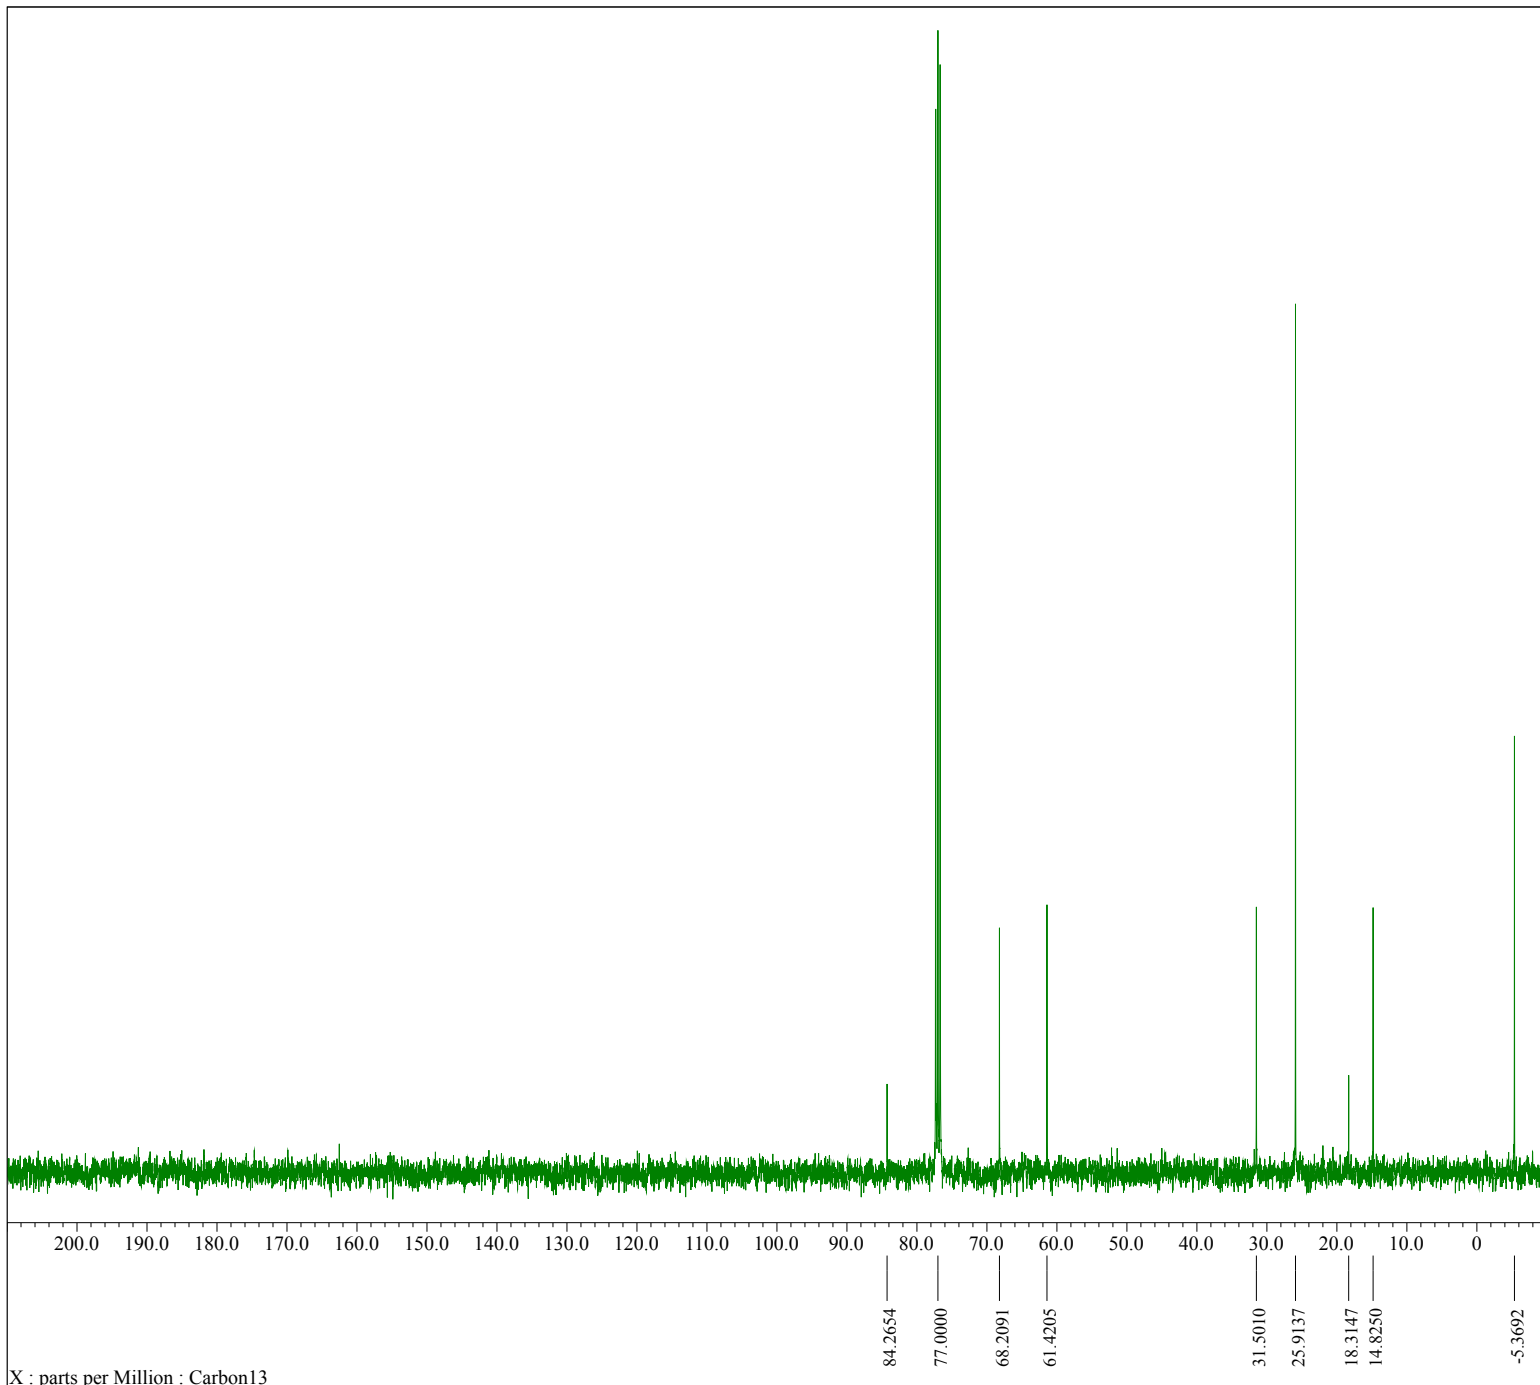

```

Filename      = yk05352data_bcm-2-3.jcf
Author       = delta
Experiment   = single_pulse_dec.jxp
Sample_Id    = yk05352data
Solvent      = CHLOROFORM-D
Creation Time = 4-SEP-2016 19:01:14
Revision Time = 20-FEB-2018 16:15:41
Current Time  = 20-FEB-2018 16:29:20

Data Format   = 1D COMPLEX
Dim_Size     = 26214
Dim_Title    = Carbon13
Dim_Units    = [ppm]
Dimensions   = X
Site         = JNM-ECS400
Spectrometer = DELTA2_NMR

Field Strength = 9.389766[T] (400[MHz])
X_Acq_Duration = 1.04333312[s]
X_Domain       = 13C
X_Freq         = 100.52530333[MHz]
X_Offset       = 100[ppm]
X_Points       = 32768
X_Prescans     = 4
X_Resolution   = 0.95846665[Hz]
X_Sweep        = 31.40703518[kHz]
X_Sweep_Clipped = 25.12562814[kHz]
Irr_Domain     = Proton
Irr_Freq       = 399.78219838[MHz]
Irr_Offset     = 5[ppm]
Clipped        = FALSE
Scans          = 128
Total_Scans    = 128

Relaxation_Delay = 1.5[s]
Recvr_Gain       = 50
Temp_Get         = 24[dC]
X_90_Width      = 8.7[us]
X_Acq_Time       = 1.04333312[s]
X_Angle         = 30[deg]
X_Atn           = 4[dB]
X_Pulse         = 2.9[us]
Irr_Atn_Dec     = 22.569[dB]
Irr_Atn_No     = 22.569[dB]
Irr_Noise       = WALTZ
Irr_Pwidth      = 0.115[ms]
Decoupling      = TRUE
Initial_Wait    = 1[s]
Noe              = TRUE
Noe Time        = 1.5[s]

```

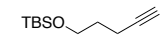

S1  
<sup>13</sup>C-NMR  
(100 MHz, CDCl<sub>3</sub>)

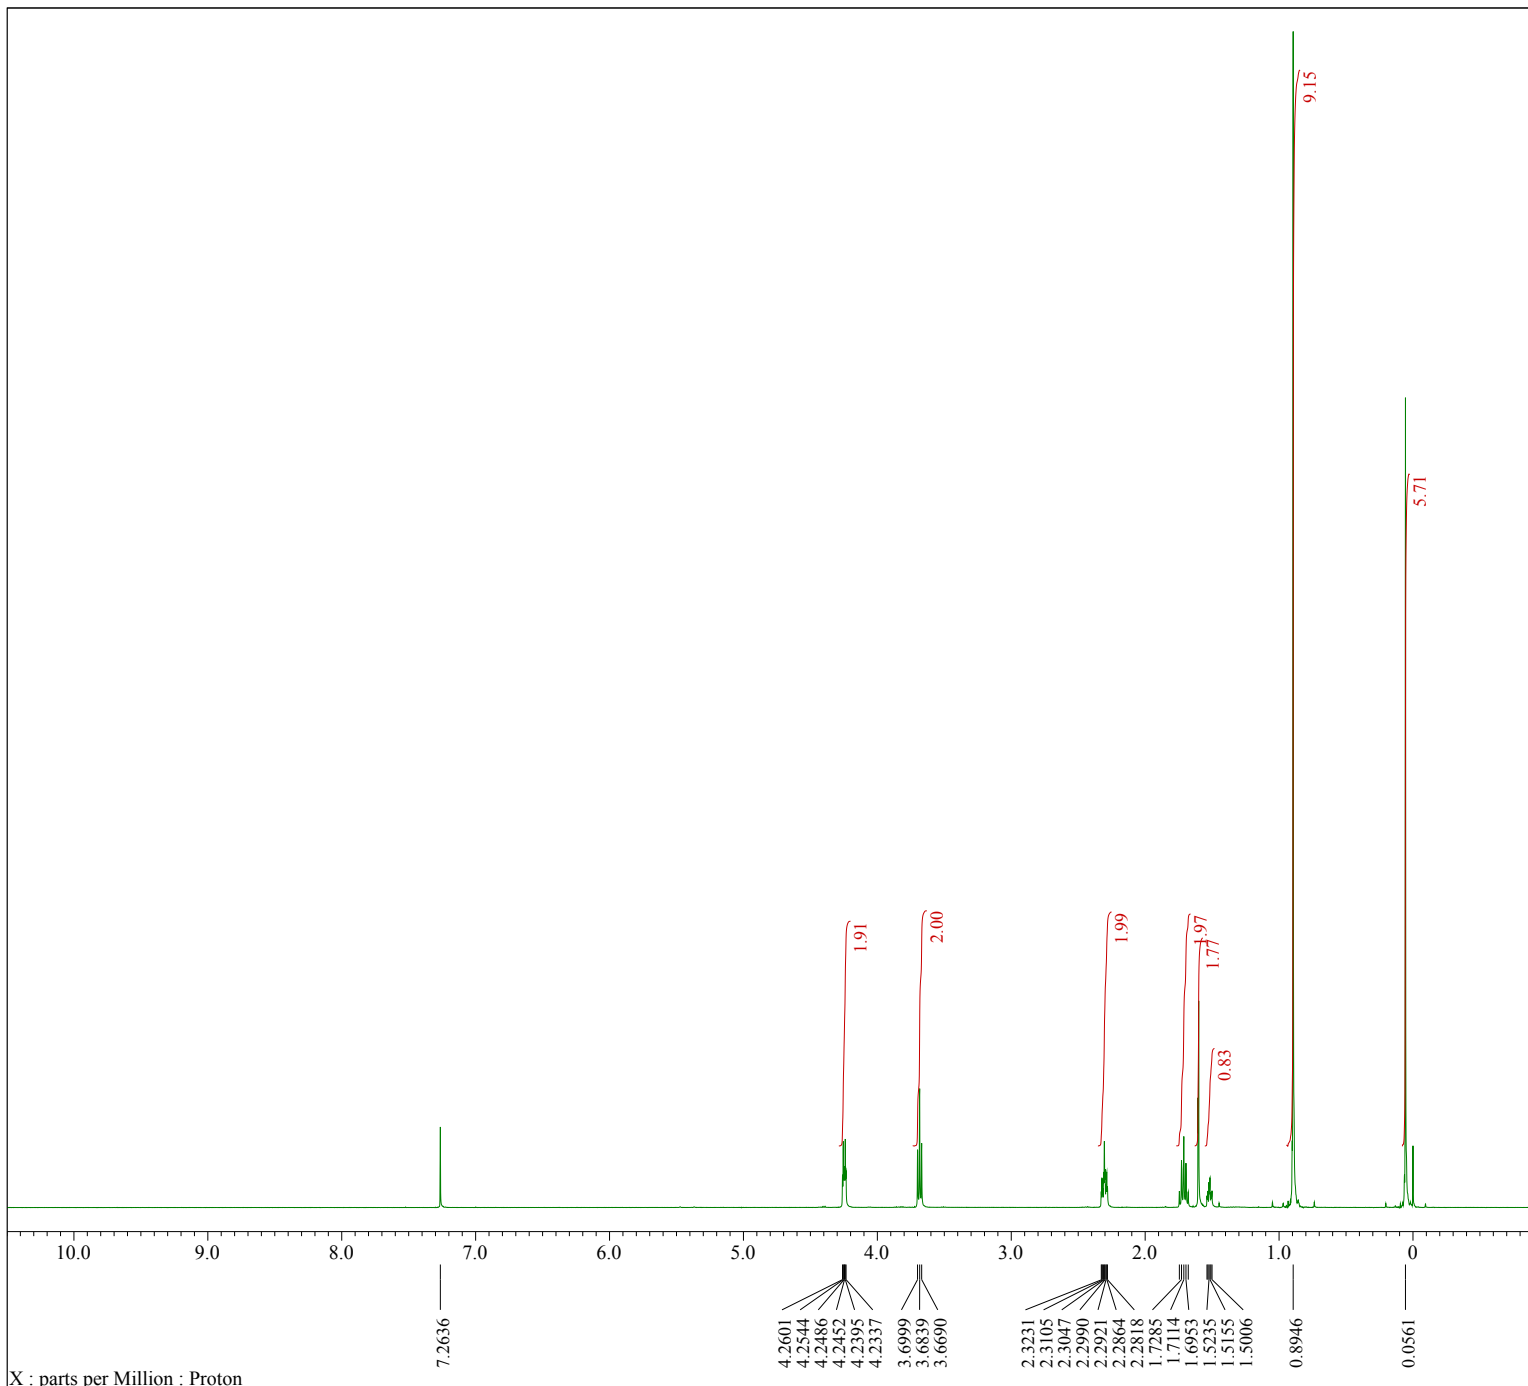

```

Filename      = yk05376data_non-data-2-
Author        = delta
Experiment    = single_pulse.jxp
Sample_Id     = yk05376data
Solvent       = CHLOROFORM-D
Creation Time = 4-SEP-2016 19:10:00
Revision Time = 20-FEB-2018 19:32:25
Current Time  = 20-FEB-2018 19:33:35

Data Format    = 1D COMPLEX
Dim_Size      = 13107
Dim_Title     = Proton
Dim_Units     = [ppm]
Dimensions    = X
Site          = JNM-ECS400
Spectrometer  = DELTA2_NMR

Field Strength = 9.389766[T] (400[MHz])
X_Acq_Duration = 2.18365952[s]
X_Domain      = 1H
X_Freq        = 399.78219838[MHz]
X_Offset      = 5[ppm]
X_Points      = 16384
X_Prescans    = 1
X_Resolution  = 0.45794685[Hz]
X_Sweep       = 7.5030012[kHz]
X_Sweep_Clip  = 6.00240096[kHz]
Irr_Domain    = Proton
Irr_Freq      = 399.78219838[MHz]
Irr_Offset    = 5[ppm]
Tri_Domain    = Proton
Tri_Freq      = 399.78219838[MHz]
Tri_Offset    = 5[ppm]
Clipped       = FALSE
Scans         = 8
Total_Scans   = 8

Relaxation_Delay = 5[s]
Recvr_Gain       = 40
Temp_Get         = 23.7[dC]
X_90_Width      = 10.025[us]
X_Acq_Time      = 2.18365952[s]
X_Angle         = 45[deg]
X_Atn           = 1[dB]
X_Pulse         = 5.0125[us]
Irr_Mode        = Off
Tri_Mode        = Off
DanTe_Presat   = FALSE
Initial_Wait    = 1[s]
Repetition Time = 7.18365952[s]
  
```

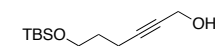

**18**  
<sup>1</sup>H-NMR  
(400 MHz, CDCl<sub>3</sub>)

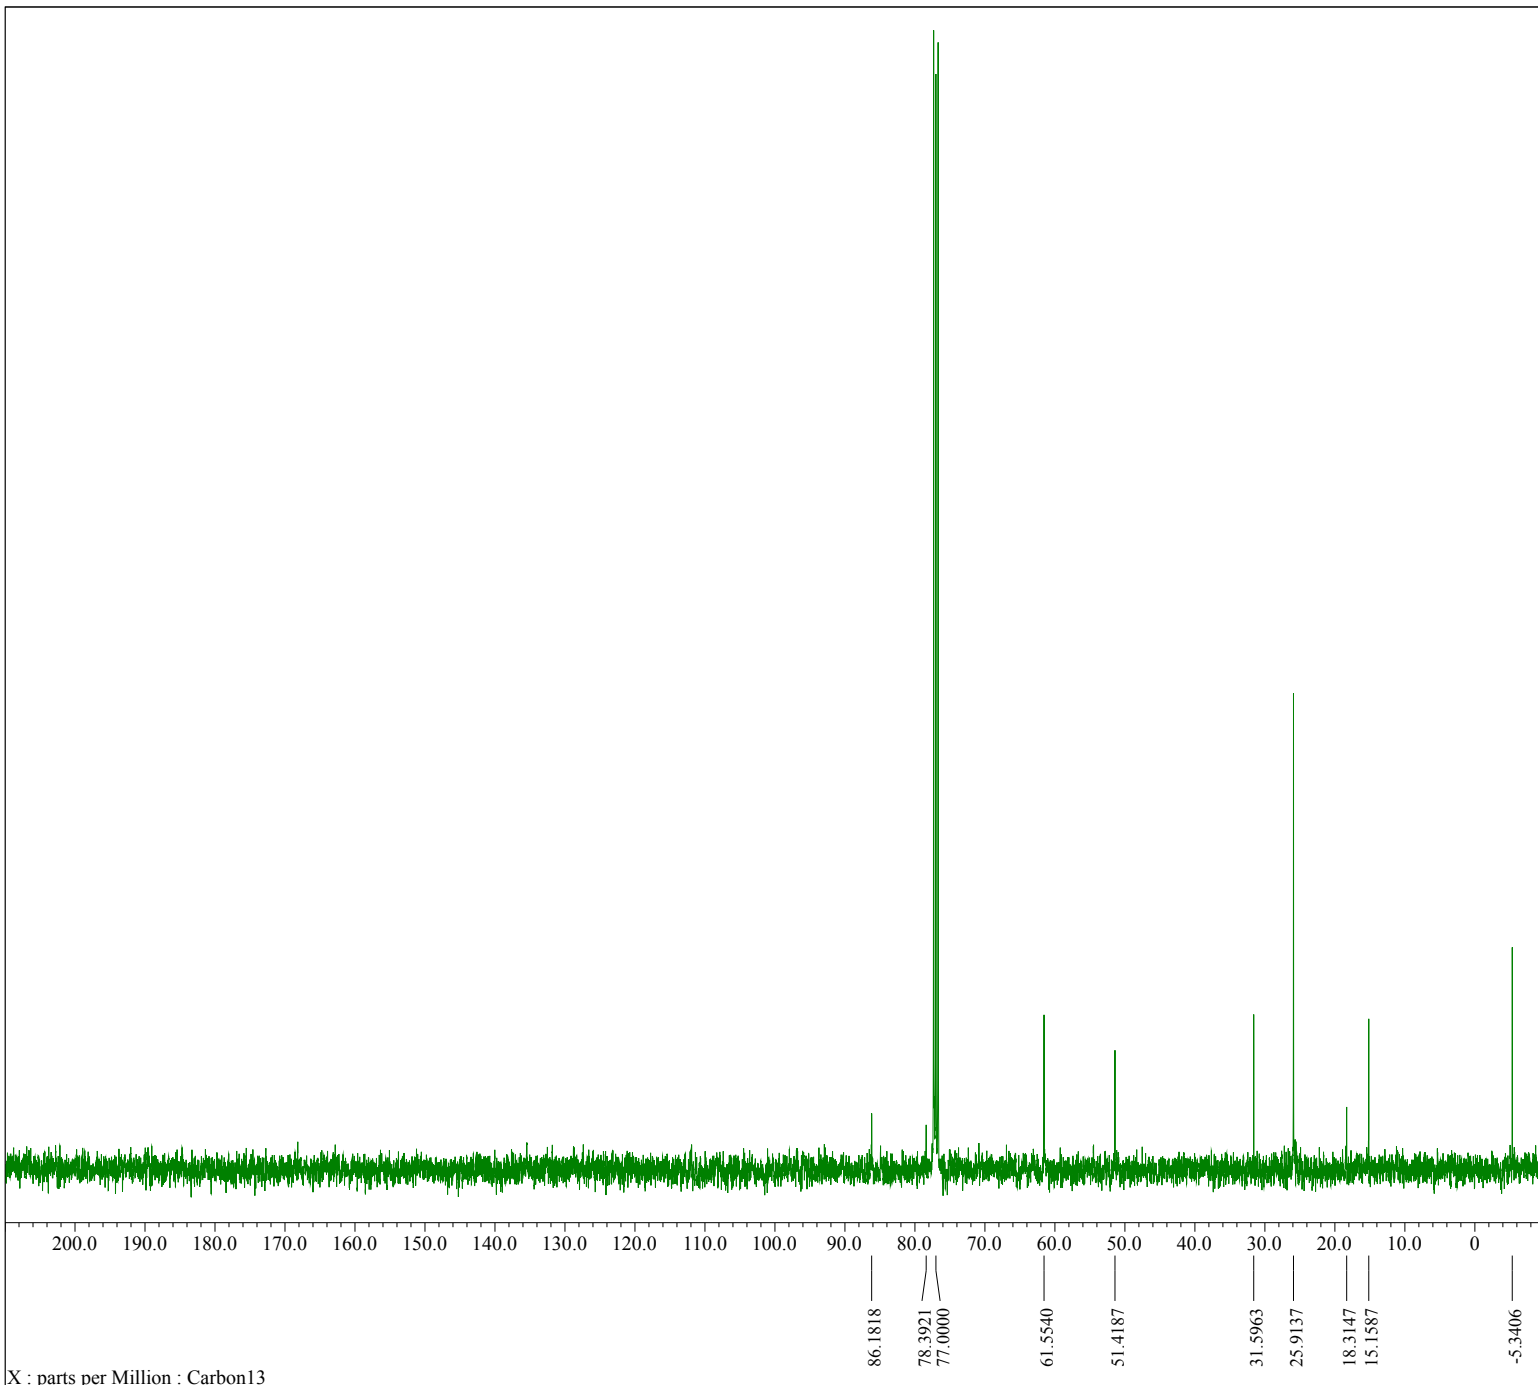

```

Filename      = yk05376data_bcm-1-3.jcf
Author       = delta
Experiment   = single_pulse_dec.jxp
Sample_Id    = yk05376data
Solvent      = CHLOROFORM-D
Creation Time = 4-SEP-2016 19:32:13
Revision Time = 20-FEB-2018 16:32:03
Current Time  = 20-FEB-2018 16:32:34
  
```

```

Data Format    = 1D COMPLEX
Dim_Size      = 26214
Dim_Title     = Carbon13
Dim_Units     = [ppm]
Dimensions    = X
Site          = JNM-ECS400
Spectrometer  = DELTA2_NMR
  
```

```

Field Strength = 9.389766[T] (400[MHz])
X_Acq_Duration = 1.04333312[s]
X_Domain       = 13C
X_Freq         = 100.52530333[MHz]
X_Offset       = 100[ppm]
X_Points       = 32768
X_Prescans     = 4
X_Resolution   = 0.95846665[Hz]
X_Sweep        = 31.40703518[kHz]
X_Sweep_Clippped = 25.12562814[kHz]
Irr_Domain     = Proton
Irr_Freq       = 399.78219838[MHz]
Irr_Offset     = 5[ppm]
Clipped        = FALSE
Scans          = 128
Total_Scans    = 128
  
```

```

Relaxation_Delay = 1.5[s]
Recvr_Gain       = 50
Temp_Get         = 23.9[dC]
X_90_Width       = 8.7[us]
X_Acq_Time       = 1.04333312[s]
X_Angle          = 30[deg]
X_Atn            = 4[dB]
X_Pulse          = 2.9[us]
Irr_Atn_Dec      = 22.569[dB]
Irr_Atn_NoE     = 22.569[dB]
Irr_Noise       = WALTZ
Irr_Pwidth       = 0.115[ms]
Decoupling       = TRUE
Initial_Wait     = 1[s]
Noe              = TRUE
Noe Time         = 1.5[s]
  
```



**18**  
<sup>13</sup>C-NMR  
(100 MHz, CDCl<sub>3</sub>)



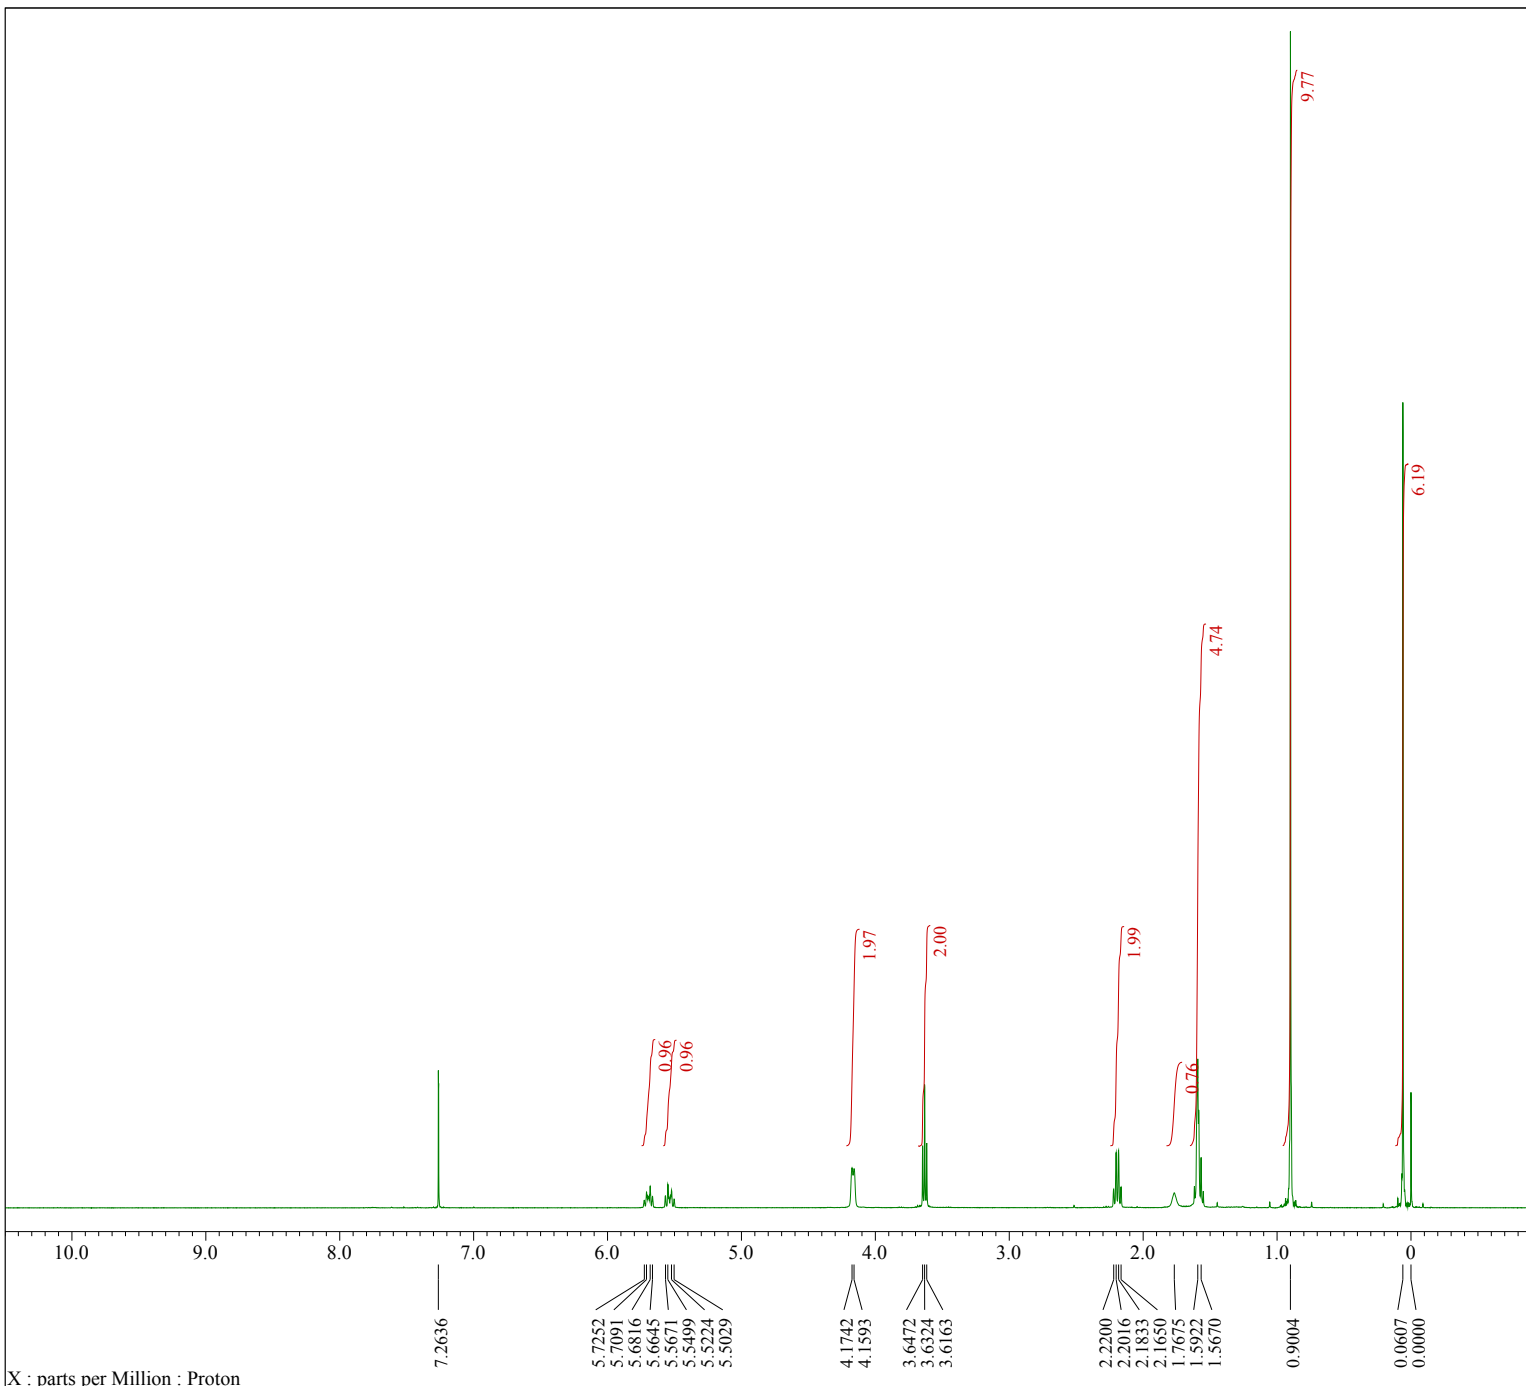

Filename = yk05378\_non-data-3-3.jd  
 Author = delta  
 Experiment = single\_pulse.jxp  
 Sample\_Id = yk05378  
 Solvent = CHLOROFORM-D  
 Creation Time = 19-SEP-2016 17:28:08  
 Revision Time = 20-FEB-2018 19:35:53  
 Current Time = 20-FEB-2018 19:36:34

Data Format = 1D COMPLEX  
 Dim\_Size = 13107  
 Dim\_Title = Proton  
 Dim\_Units = [ppm]  
 Dimensions = X  
 Site = JNM-ECS400  
 Spectrometer = DELTA2\_NMR

Field Strength = 9.389766[T] (400[MHz])  
 X\_Acq\_Duration = 2.18365952[s]  
 X\_Domain = 1H  
 X\_Freq = 399.78219838[MHz]  
 X\_Offset = 5[ppm]  
 X\_Points = 16384  
 X\_Prescans = 1  
 X\_Resolution = 0.45794685[Hz]  
 X\_Sweep = 7.5030012[kHz]  
 X\_Sweep\_Clippped = 6.00240096[kHz]  
 Irr\_Domain = Proton  
 Irr\_Freq = 399.78219838[MHz]  
 Irr\_Offset = 5[ppm]  
 Tri\_Domain = Proton  
 Tri\_Freq = 399.78219838[MHz]  
 Tri\_Offset = 5[ppm]  
 Clipped = FALSE  
 Scans = 8  
 Total\_Scans = 8

Relaxation\_Delay = 5[s]  
 Recvr\_Gain = 42  
 Temp\_Get = 23.7[dC]  
 X\_90\_Width = 10.025[us]  
 X\_Acq\_Time = 2.18365952[s]  
 X\_Angle = 45[deg]  
 X\_Atn = 1[dB]  
 X\_Pulse = 5.0125[us]  
 Irr\_Mode = Off  
 Tri\_Mode = Off  
 Dante\_Presat = FALSE  
 Initial\_Wait = 1[s]  
 Repetition Time = 7.18365952[s]

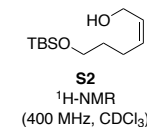

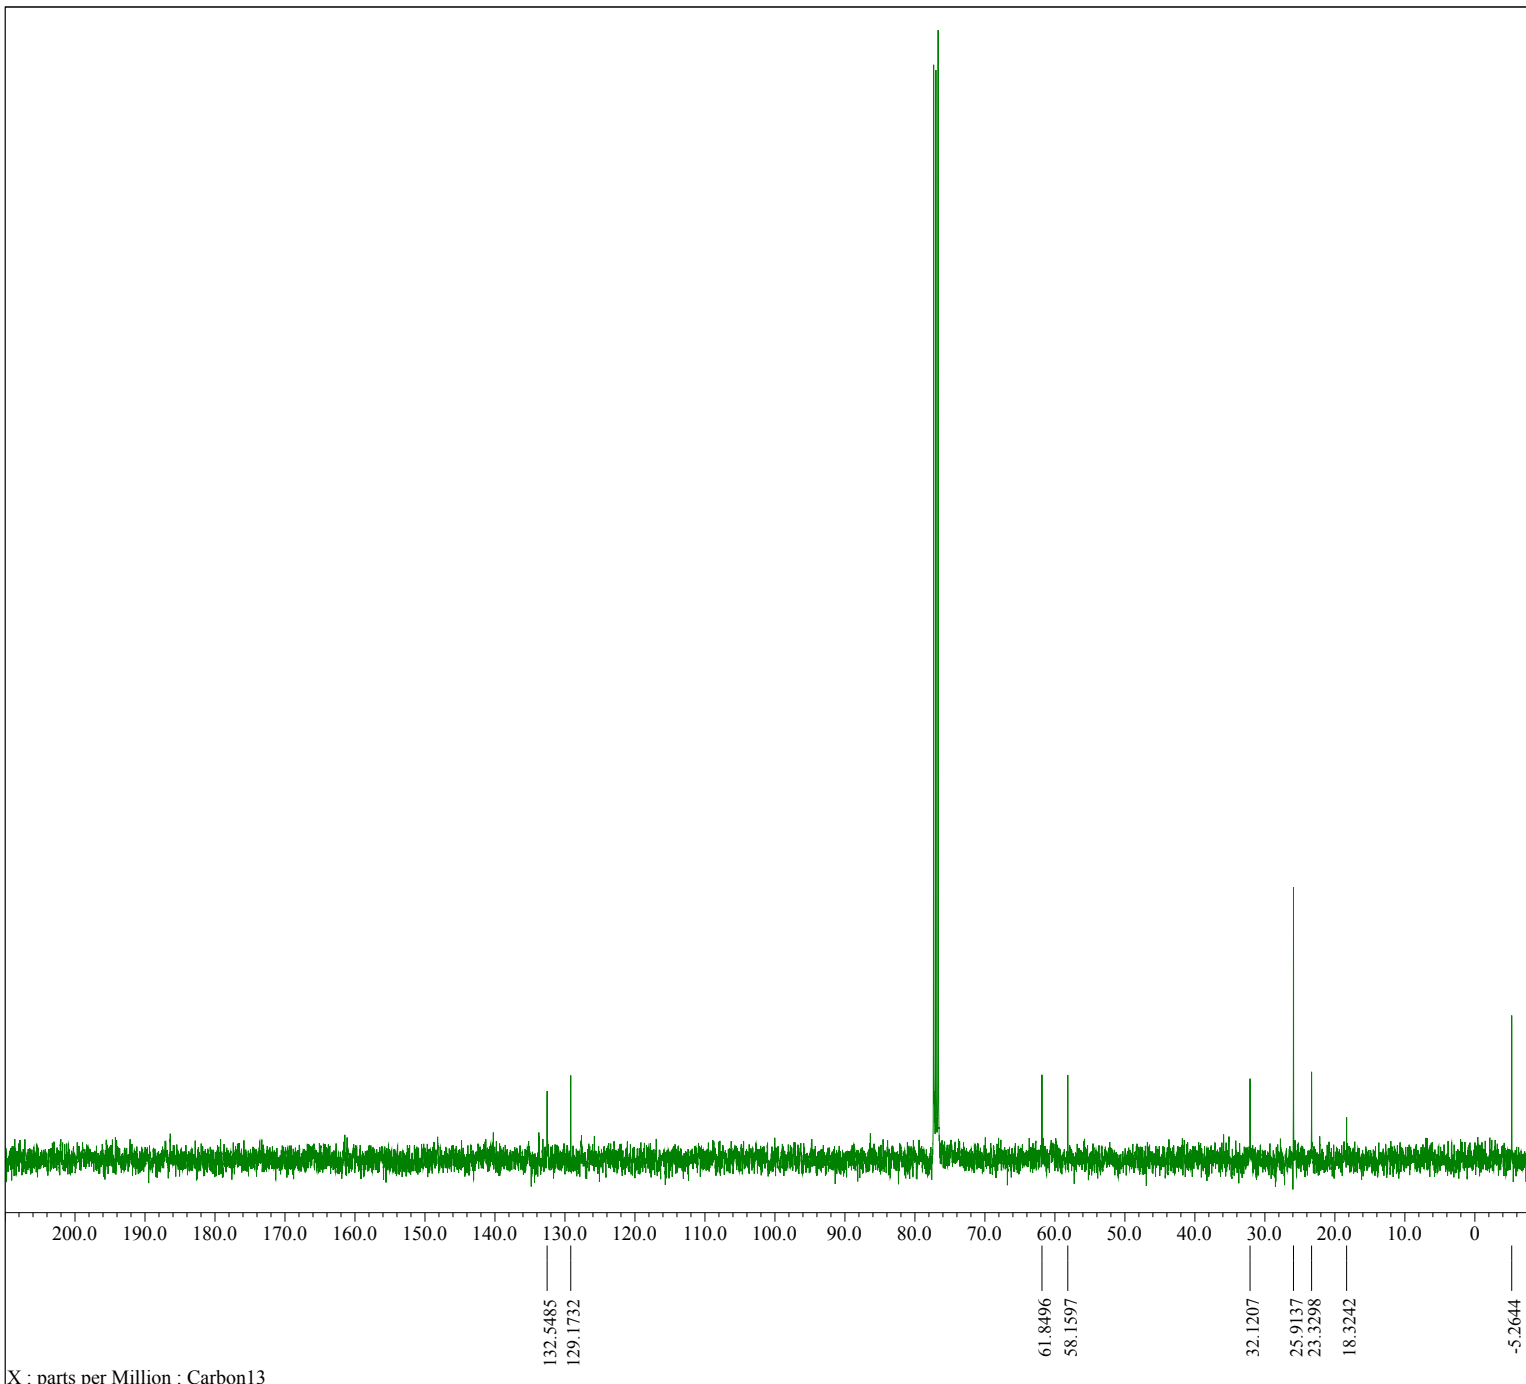

```

Filename      = yk05378_bcm-1-3.jdf
Author       = delta
Experiment   = single_pulse_dec.jxp
Sample_Id    = yk05378
Solvent      = CHLOROFORM-D
Creation Time = 19-SEP-2016 17:29:51
Revision Time = 20-FEB-2018 16:34:39
Current Time  = 20-FEB-2018 16:35:08

Data Format   = 1D COMPLEX
Dim_Size     = 26214
Dim_Title    = Carbon13
Dim_Units    = [ppm]
Dimensions   = X
Site         = JNM-ECS400
Spectrometer = DELTA2_NMR

Field Strength = 9.389766[T] (400[MHz])
X_Acq_Duration = 1.04333312[s]
X_Domain       = 13C
X_Freq         = 100.52530333[MHz]
X_Offset       = 100[ppm]
X_Points       = 32768
X_Prescans     = 4
X_Resolution   = 0.95846665[Hz]
X_Sweep        = 31.40703518[kHz]
X_Sweep_Clippped = 25.12562814[kHz]
Irr_Domain     = Proton
Irr_Freq       = 399.78219838[MHz]
Irr_Offset     = 5[ppm]
Clipped        = FALSE
Scans          = 128
Total_Scans    = 128

Relaxation_Delay = 1.5[s]
Recvr_Gain       = 50
Temp_Get         = 23.6[dC]
X_90_Width      = 8.7[us]
X_Acq_Time      = 1.04333312[s]
X_Angle         = 30[deg]
X_Atn           = 4[dB]
X_Pulse         = 2.9[us]
Irr_Atn_Dec     = 22.569[dB]
Irr_Atn_No     = 22.569[dB]
Irr_Noise      = WALTZ
Irr_Pwidth     = 0.115[ms]
Decoupling      = TRUE
Initial_Wait    = 1[s]
Noe             = TRUE
Noe Time        = 1.5[s]
  
```

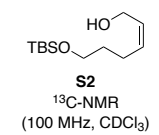

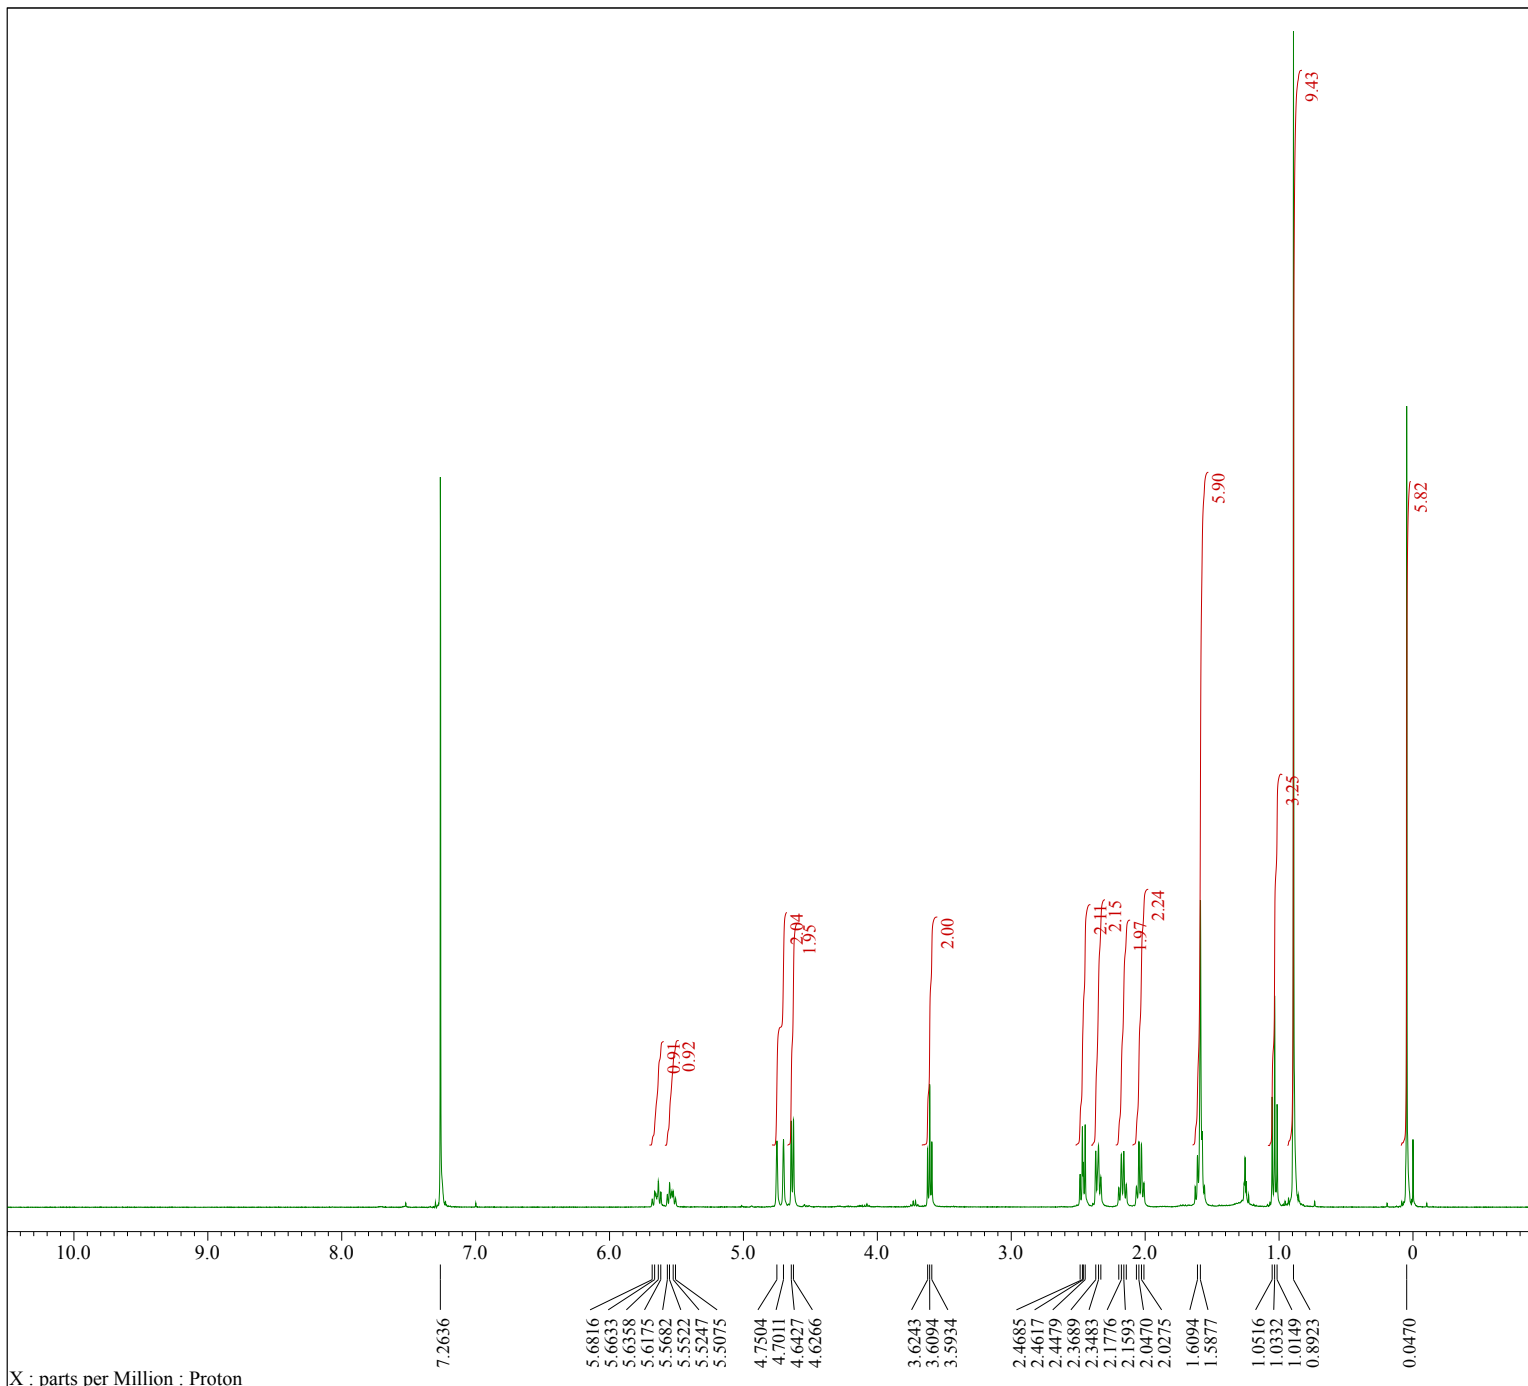

Filename = yk05380data\_non-data-1-  
 Author = delta  
 Experiment = single\_pulse.jxp  
 Sample\_Id = yk05380data  
 Solvent = CHLOROFORM-D  
 Creation Time = 5-OCT-2016 22:50:55  
 Revision Time = 20-FEB-2018 19:39:32  
 Current Time = 20-FEB-2018 19:40:04

Data Format = 1D COMPLEX  
 Dim\_Size = 13107  
 Dim\_Title = Proton  
 Dim\_Units = [ppm]  
 Dimensions = X  
 Site = JNM-ECS400  
 Spectrometer = DELTA2\_NMR

Field Strength = 9.389766[T] (400[MHz])  
 X\_Acq\_Duration = 2.18365952[s]  
 X\_Domain = 1H  
 X\_Freq = 399.78219838[MHz]  
 X\_Offset = 5[ppm]  
 X\_Points = 16384  
 X\_Prescans = 1  
 X\_Resolution = 0.45794685[Hz]  
 X\_Sweep = 7.5030012[kHz]  
 X\_Sweep\_Clippped = 6.00240096[kHz]  
 Irr\_Domain = Proton  
 Irr\_Freq = 399.78219838[MHz]  
 Irr\_Offset = 5[ppm]  
 Tri\_Domain = Proton  
 Tri\_Freq = 399.78219838[MHz]  
 Tri\_Offset = 5[ppm]  
 Clipped = FALSE  
 Scans = 8  
 Total\_Scans = 8

Relaxation\_Delay = 5[s]  
 Recvr\_Gain = 40  
 Temp\_Get = 23.4[dC]  
 X\_90\_Width = 10.025[us]  
 X\_Acq\_Time = 2.18365952[s]  
 X\_Angle = 45[deg]  
 X\_Atn = 1[dB]  
 X\_Pulse = 5.0125[us]  
 Irr\_Mode = Off  
 Tri\_Mode = Off  
 DanTe\_Presat = FALSE  
 Initial\_Wait = 1[s]  
 Repetition Time = 7.18365952[s]

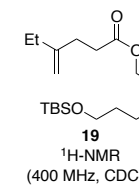

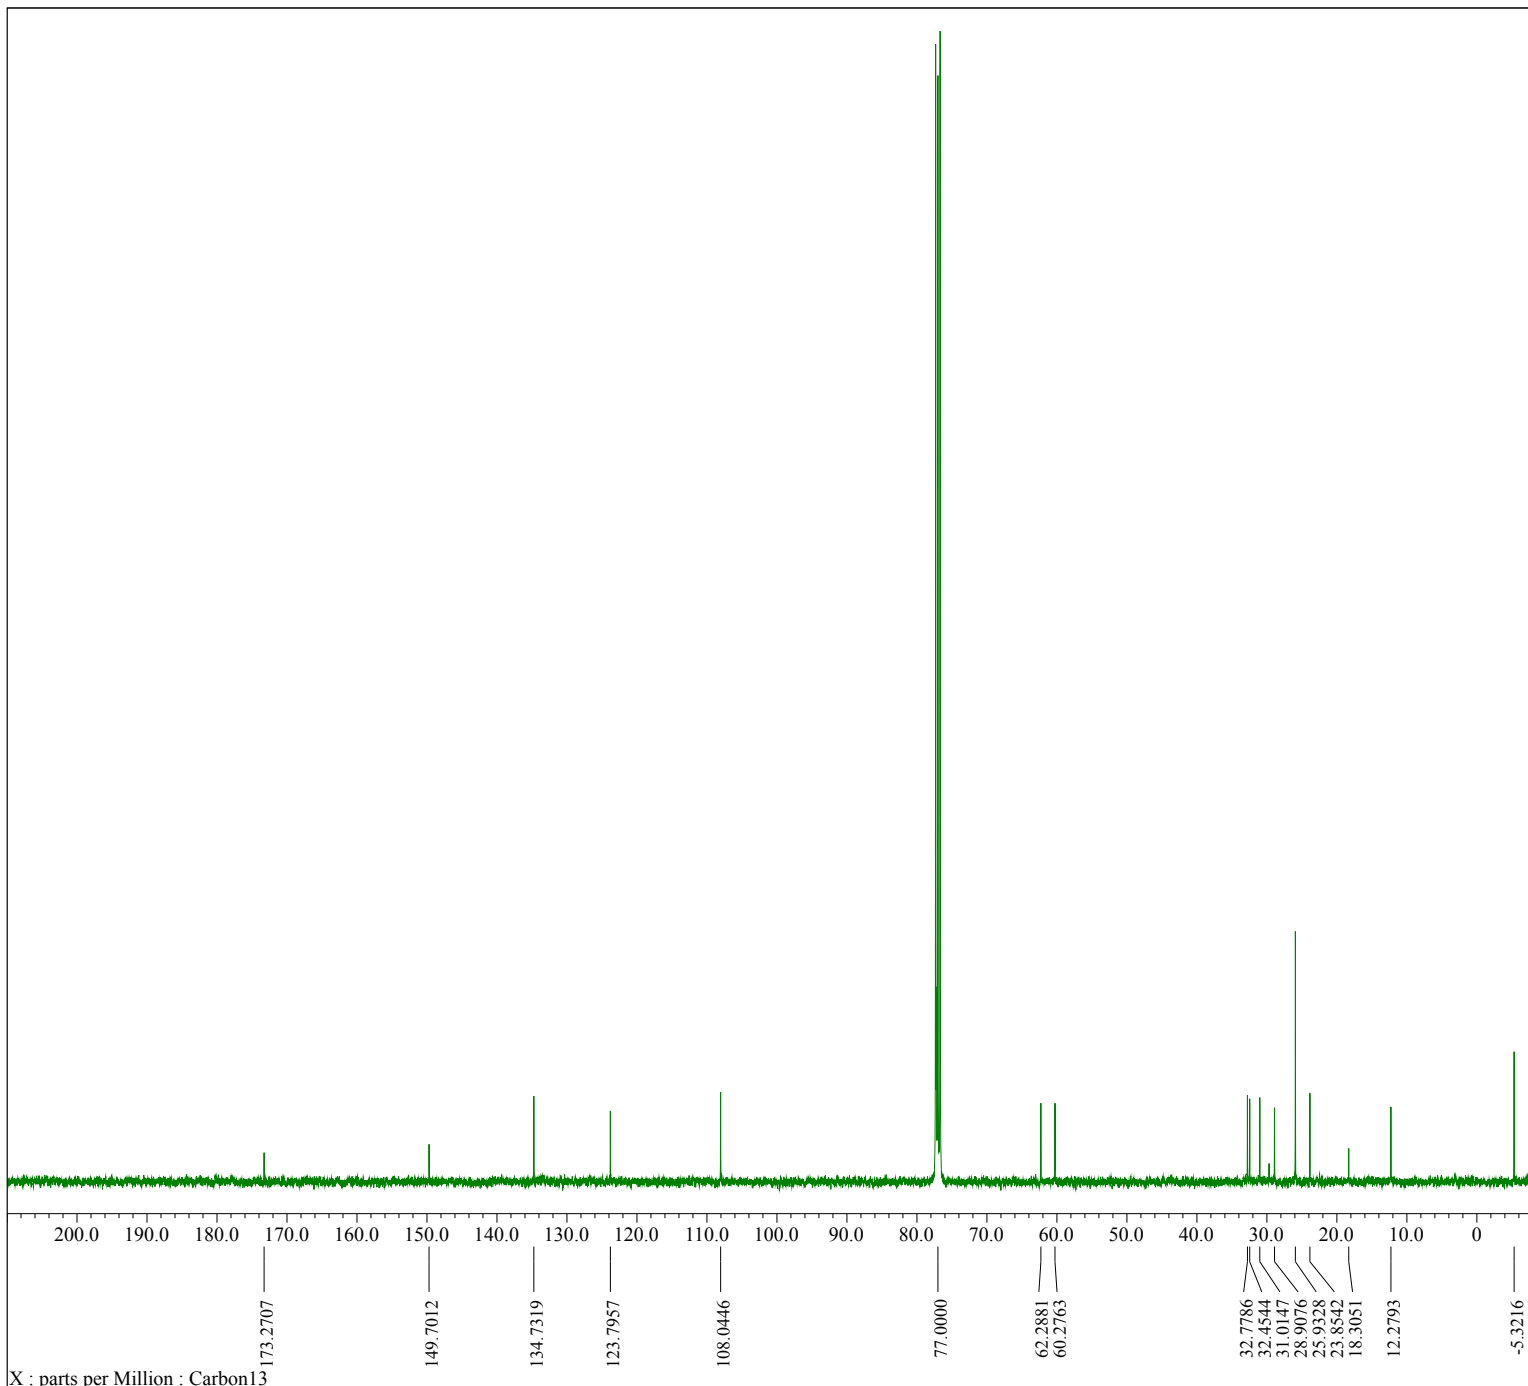

```

Filename      = yk05380data_bcm-1-3.jcf
Author       = delta
Experiment   = single_pulse_dec.jxp
Sample_Id    = yk05380data
Solvent      = CHLOROFORM-D
Creation Time = 6-OCT-2016 01:03:14
Revision Time = 20-FEB-2018 16:37:04
Current Time  = 20-FEB-2018 16:37:40

Data Format   = 1D COMPLEX
Dim_Size     = 26214
Dim_Title    = Carbon13
Dim_Units    = [ppm]
Dimensions   = X
Site         = JNM-ECS400
Spectrometer = DELTA2_NMR

Field Strength = 9.389766[T] (400[MHz])
X_Acq_Duration = 1.04333312[s]
X_Domain      = 13C
X_Freq        = 100.52530333[MHz]
X_Offset      = 100[ppm]
X_Points      = 32768
X_Prescans    = 4
X_Resolution  = 0.95846665[Hz]
X_Sweep       = 31.40703518[kHz]
X_Sweep_Clippped = 25.12562814[kHz]
Irr_Domain    = Proton
Irr_Freq      = 399.78219838[MHz]
Irr_Offset    = 5[ppm]
Clipped       = FALSE
Scans         = 2000
Total_Scans   = 2000

Relaxation_Delay = 1.5[s]
Recvr_Gain       = 50
Temp_Get         = 23.6[dC]
X_90_Width      = 8.7[us]
X_Acq_Time      = 1.04333312[s]
X_Angle         = 30[deg]
X_Atn           = 4[dB]
X_Pulse         = 2.9[us]
Irr_Atn_Dec     = 22.569[dB]
Irr_Atn_No     = 22.569[dB]
Irr_Noise      = WALTZ
Irr_Pwidth     = 0.115[ms]
Decoupling      = TRUE
Initial_Wait    = 1[s]
Noe             = TRUE
Noe Time        = 1.5[s]

```

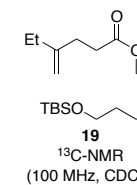

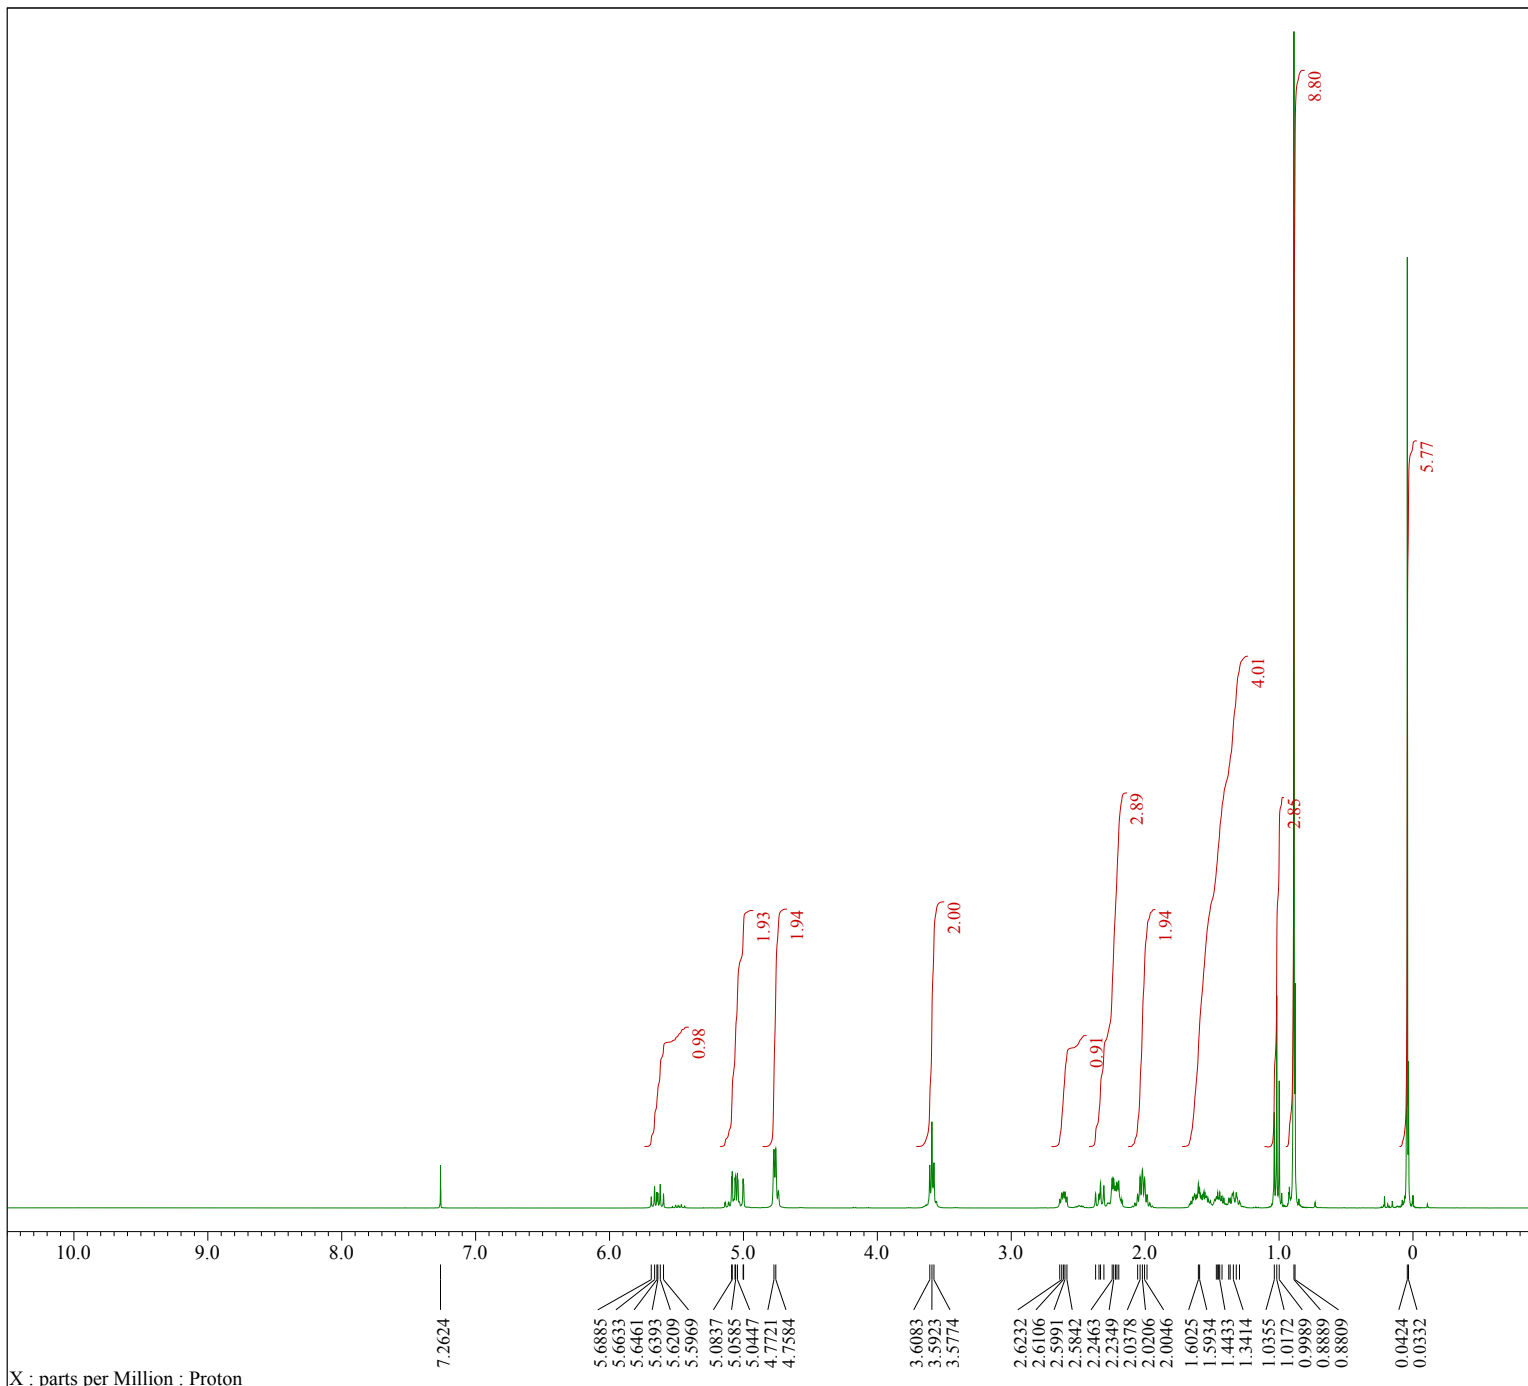

Filename = yk05381data\_non-data-1-  
 Author = delta  
 Experiment = single\_pulse.jxp  
 Sample\_id = yk05381data  
 Solvent = CHLOROFORM-D  
 Creation Time = 8-NOV-2016 09:46:02  
 Revision Time = 20-FEB-2018 19:45:38  
 Current Time = 20-FEB-2018 19:46:29

Data Format = 1D COMPLEX  
 Dim Size = 13107  
 Dim Title = Proton  
 Dim Units = [ppm]  
 Dimensions = X  
 Site = JNM-ECS400  
 Spectrometer = DELTA2\_NMR

Field Strength = 9.389766[T] (400[MHz])  
 X\_Acq\_Duration = 2.18365952[s]  
 X\_Domain = 1H  
 X\_Freq = 399.78219838[MHz]  
 X\_Offset = 5[ppm]  
 X\_Points = 16384  
 X\_Prescans = 1  
 X\_Resolution = 0.45794685[Hz]  
 X\_Sweep = 7.5030012[kHz]  
 X\_Sweep\_Clipped = 6.00240096[kHz]  
 Irr\_Domain = Proton  
 Irr\_Freq = 399.78219838[MHz]  
 Irr\_Offset = 5[ppm]  
 Tri\_Domain = Proton  
 Tri\_Freq = 399.78219838[MHz]  
 Tri\_Offset = 5[ppm]  
 Clipped = FALSE  
 Scans = 8  
 Total\_Scans = 8

Relaxation\_Delay = 5[s]  
 Recvr\_Gain = 30  
 Temp\_Get = 23.4[dC]  
 X\_90\_Width = 10.025[us]  
 X\_Acq\_Time = 2.18365952[s]  
 X\_Angle = 45[deg]  
 X\_Atn = 1[dB]  
 X\_Pulse = 5.0125[us]  
 Irr\_Mode = Off  
 Tri\_Mode = Off  
 DanTe\_Presat = FALSE  
 Initial\_Wait = 1[s]  
 Repetition Time = 7.18365952[s]

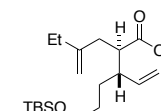

**20**  
<sup>1</sup>H-NMR  
 (400 MHz, CDCl<sub>3</sub>)

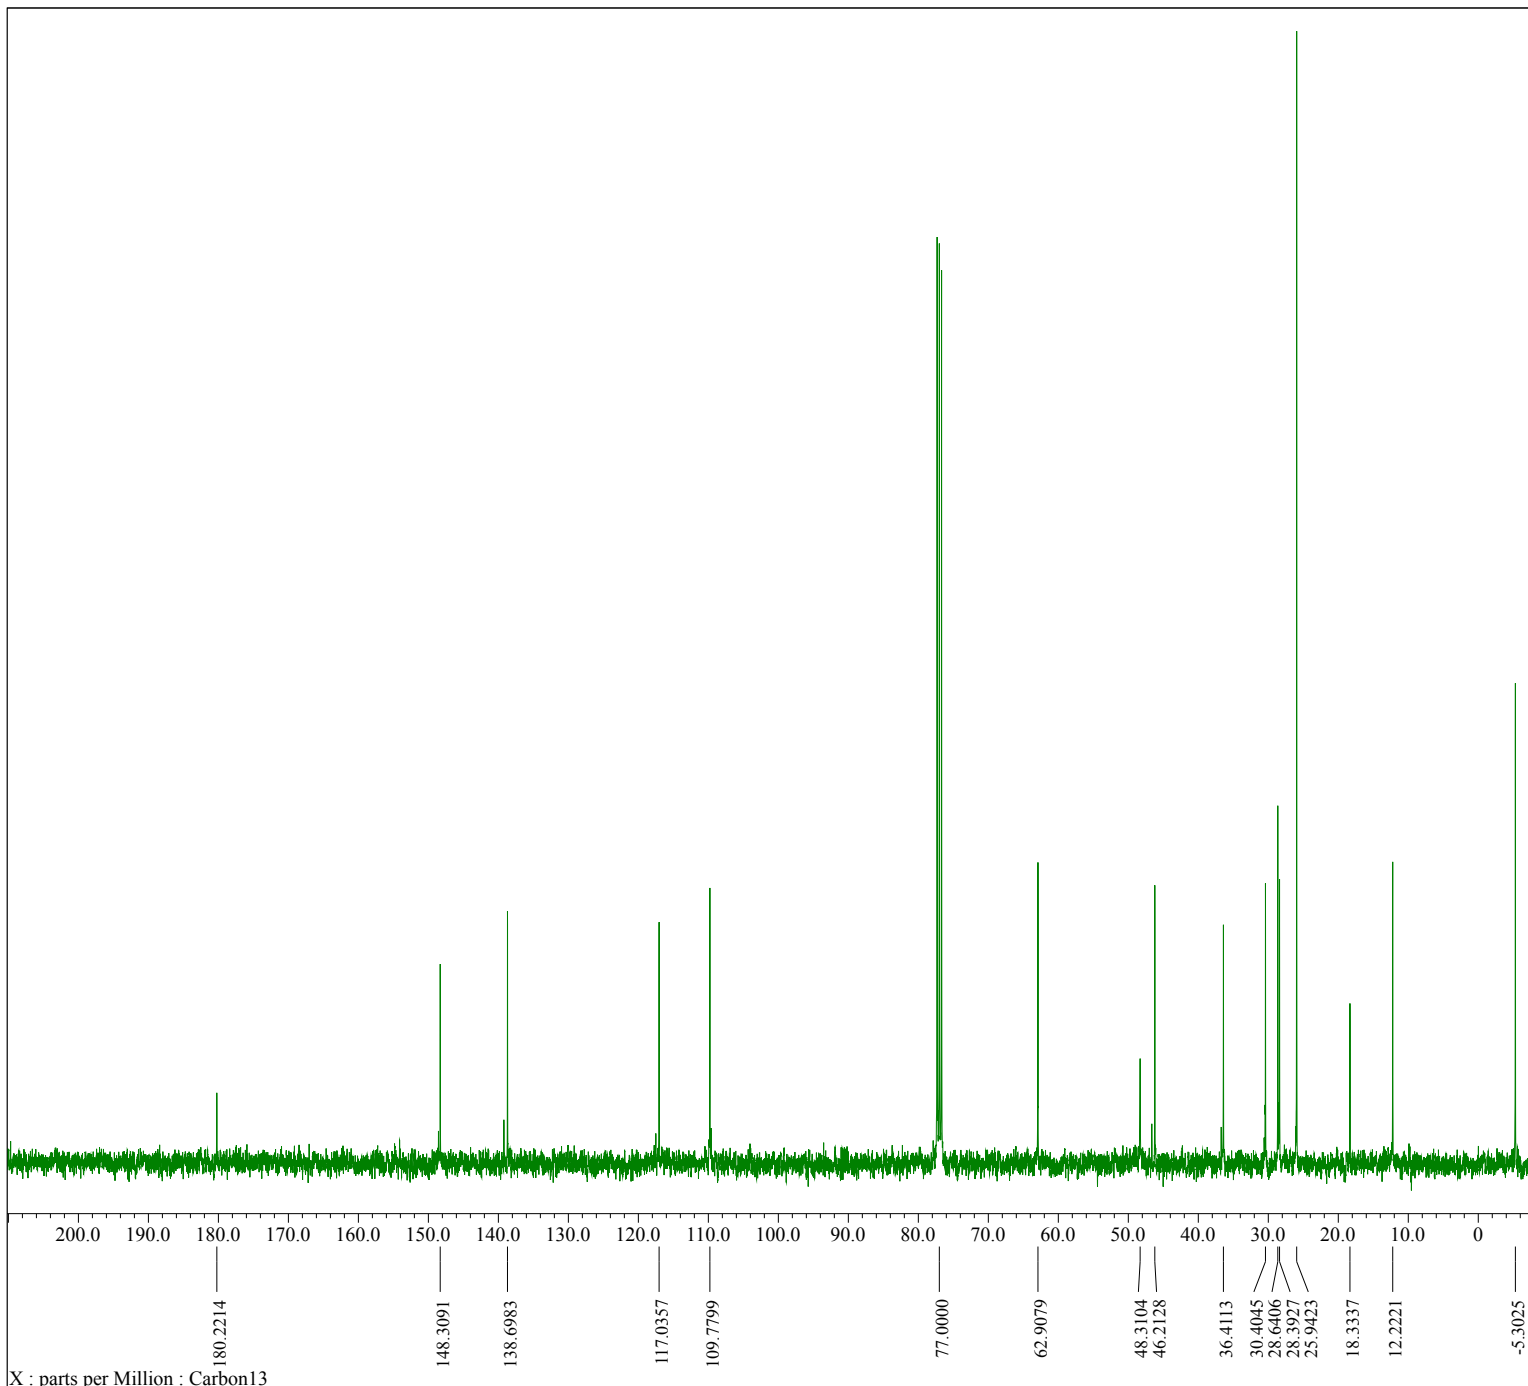

```

Filename      = yk05381data_bcm-1-3.jdf
Author       = delta
Experiment   = single_pulse_dec.jxp
Sample_Id    = yk05381data
Solvent      = CHLOROFORM-D
Creation Time = 8-NOV-2016 09:48:33
Revision Time = 20-FEB-2018 16:39:32
Current Time  = 20-FEB-2018 16:40:03
  
```

```

Data Format    = 1D COMPLEX
Dim_Size      = 26214
Dim_Title     = Carbon13
Dim_Units     = [ppm]
Dimensions    = X
Site          = JNM-ECS400
Spectrometer  = DELTA2_NMR
  
```

```

Field Strength = 9.389766[T] (400[MHz])
X_Acq_Duration = 1.04333312[s]
X_Domain       = 13C
X_Freq         = 100.52530333[MHz]
X_Offset       = 100[ppm]
X_Points       = 32768
X_Prescans     = 4
X_Resolution   = 0.95846665[Hz]
X_Sweep        = 31.40703518[kHz]
X_Sweep_Clippped = 25.12562814[kHz]
Irr_Domain     = Proton
Irr_Freq       = 399.78219838[MHz]
Irr_Offset     = 5[ppm]
Clipped        = FALSE
Scans          = 128
Total_Scans    = 128
  
```

```

Relaxation_Delay = 1.5[s]
Recvr_Gain       = 50
Temp_Get         = 23.6[dC]
X_90_Width       = 8.7[us]
X_Acq_Time       = 1.04333312[s]
X_Angle          = 30[deg]
X_Atn            = 4[dB]
X_Pulse          = 2.9[us]
Irr_Atn_Dec      = 22.569[dB]
Irr_Atn_NoE     = 22.569[dB]
Irr_Noise       = WALTZ
Irr_Pwidth       = 0.115[ms]
Decoupling       = TRUE
Initial_Wait     = 1[s]
Noe              = TRUE
Noe Time         = 1.5[s]
  
```



**20**  
<sup>13</sup>C-NMR  
(100 MHz, CDCl<sub>3</sub>)

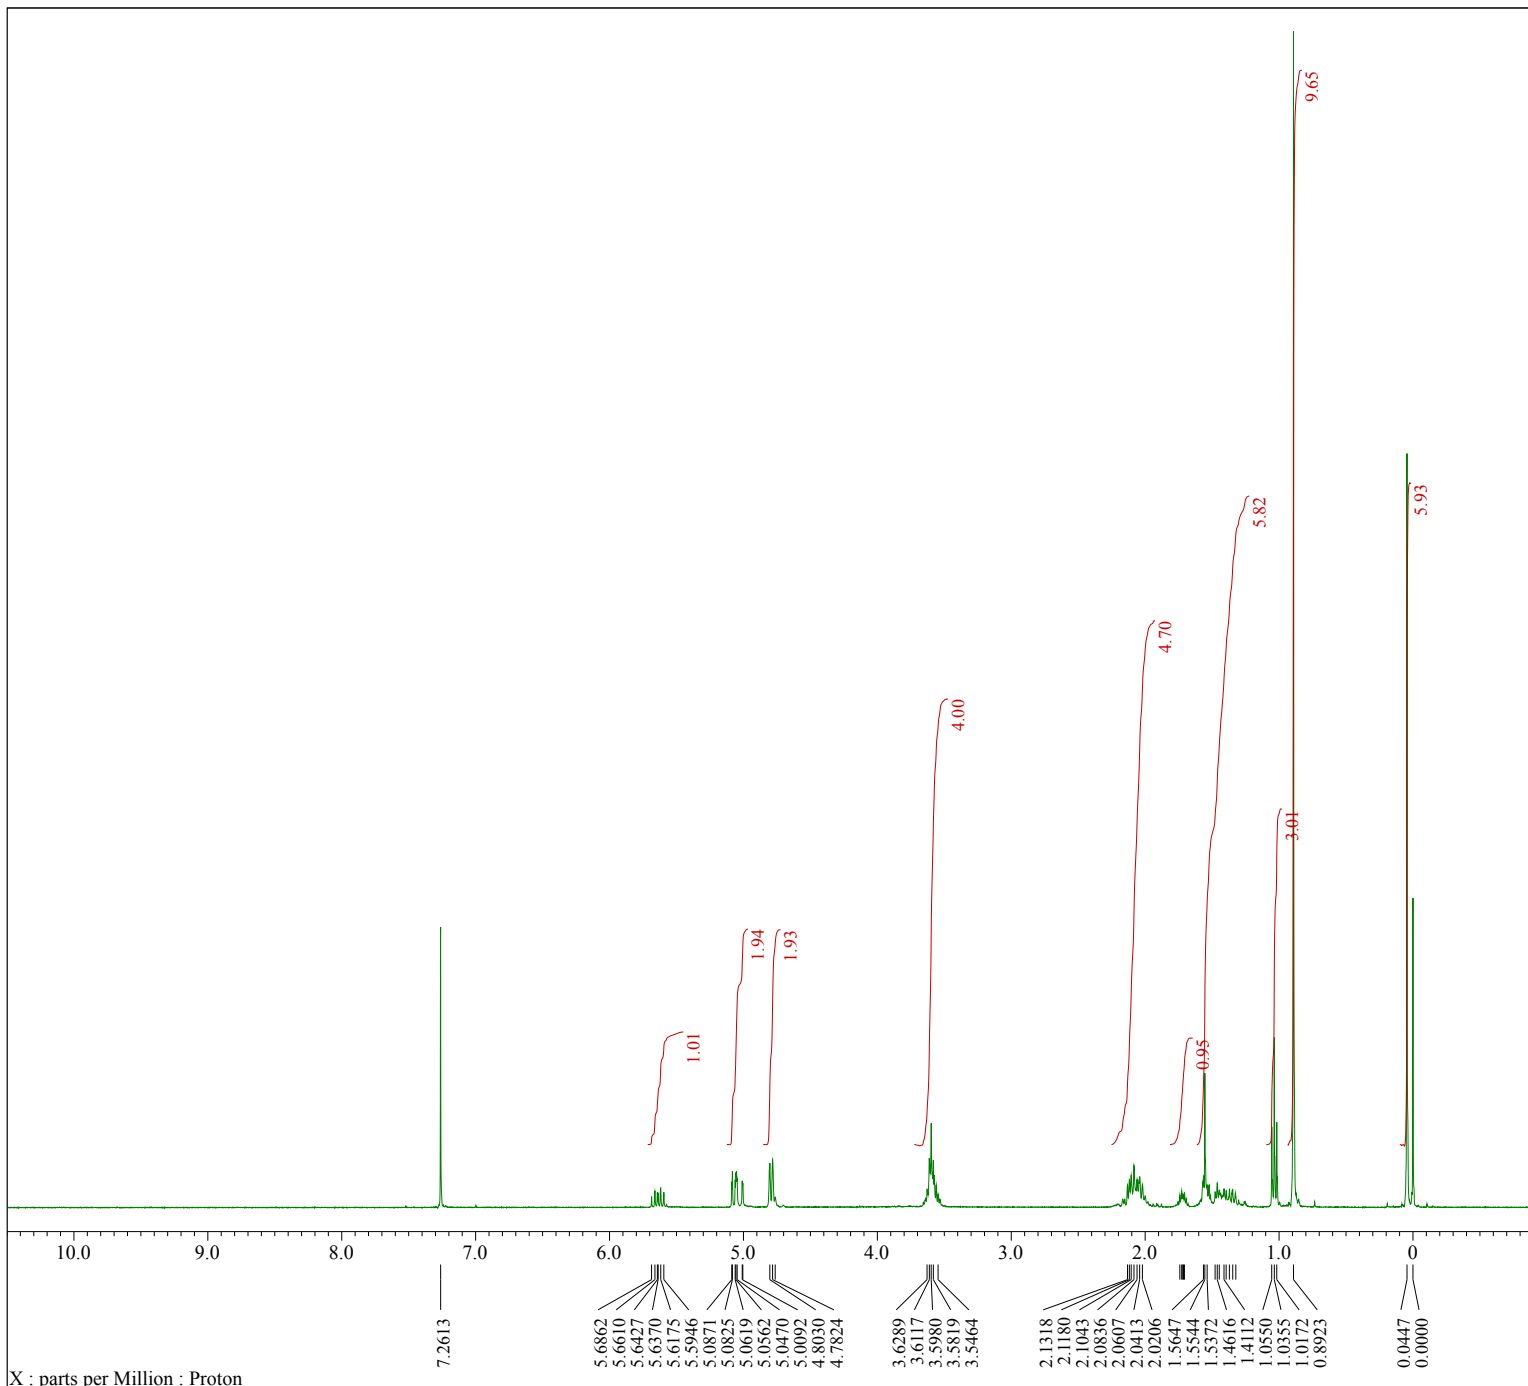

Filename = yk05385data\_non-data-1-  
 Author = delta  
 Experiment = single\_pulse.jxp  
 Sample\_Id = yk05385data  
 Solvent = CHLOROFORM-D  
 Creation Time = 11-DEC-2016 16:20:56  
 Revision Time = 20-FEB-2018 19:49:26  
 Current Time = 20-FEB-2018 19:49:58

Data Format = 1D COMPLEX  
 Dim\_Size = 13107  
 Dim\_Title = Proton  
 Dim\_Units = [ppm]  
 Dimensions = X  
 Site = JNM-ECS400  
 Spectrometer = DELTA2\_NMR

Field Strength = 9.389766[T] (400[MHz])  
 X\_Acq\_Duration = 2.18365952[s]  
 X\_Domain = 1H  
 X\_Freq = 399.78219838[MHz]  
 X\_Offset = 5[ppm]  
 X\_Points = 16384  
 X\_Prescans = 1  
 X\_Resolution = 0.45794685[Hz]  
 X\_Sweep = 7.5030012[kHz]  
 X\_Sweep\_Clippped = 6.00240096[kHz]  
 Irr\_Domain = Proton  
 Irr\_Freq = 399.78219838[MHz]  
 Irr\_Offset = 5[ppm]  
 Tri\_Domain = Proton  
 Tri\_Freq = 399.78219838[MHz]  
 Tri\_Offset = 5[ppm]  
 Clipped = TRUE  
 Scans = 8  
 Total\_Scans = 8

Relaxation\_Delay = 5[s]  
 Recvr\_Gain = 50  
 Temp\_Get = 22.4[dC]  
 X\_90\_Width = 10.025[us]  
 X\_Acq\_Time = 2.18365952[s]  
 X\_Angle = 45[deg]  
 X\_Atn = 1[dB]  
 X\_Pulse = 5.0125[us]  
 Irr\_Mode = Off  
 Tri\_Mode = Off  
 DanTe\_Presat = FALSE  
 Initial\_Wait = 1[s]  
 Repetition Time = 7.18365952[s]

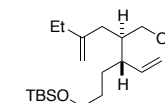

**S3**  
<sup>1</sup>H-NMR  
 (400 MHz, CDCl<sub>3</sub>)

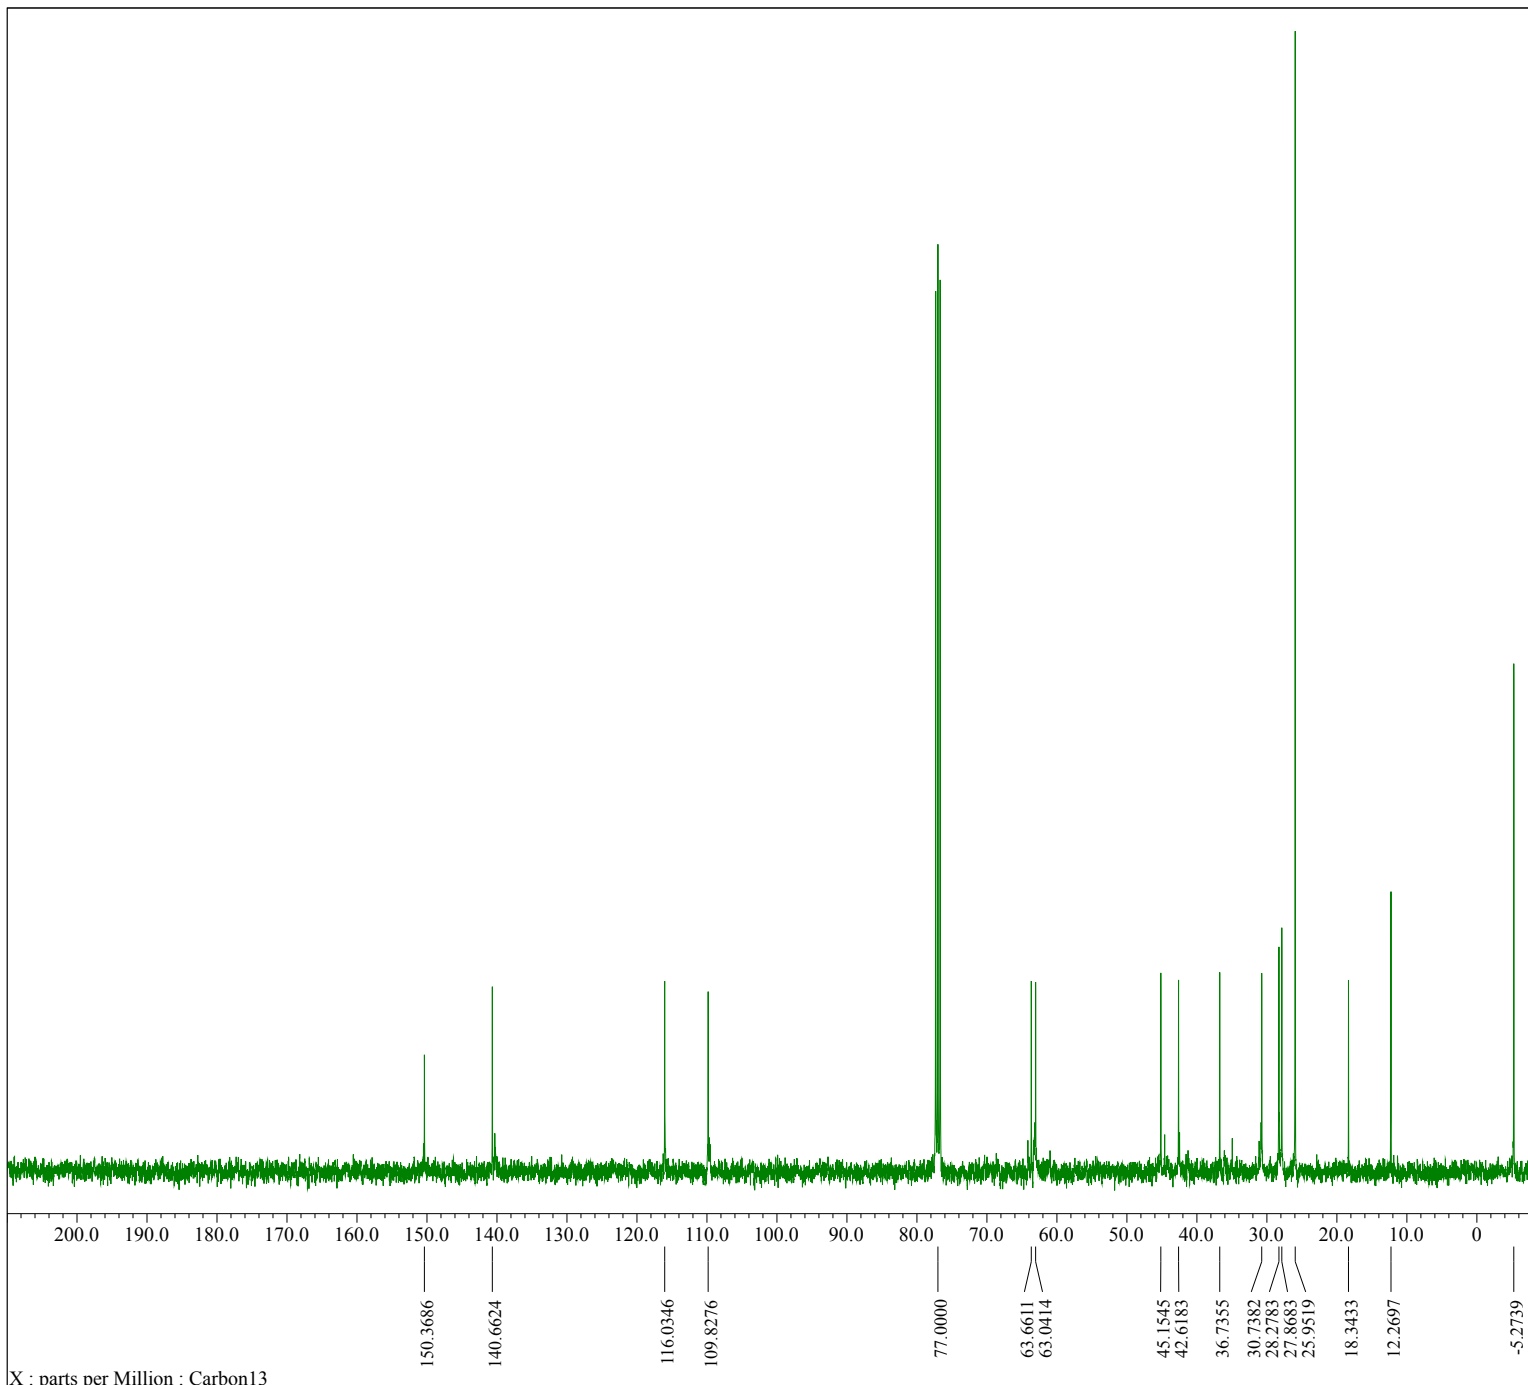

```

Filename      = yk05385data_bcm-1-3.jcf
Author       = delta
Experiment   = single_pulse_dec.jxp
Sample_Id    = yk05385data
Solvent      = CHLOROFORM-D
Creation Time = 8-NOV-2016 13:38:55
Revision Time = 20-FEB-2018 16:41:48
Current Time  = 20-FEB-2018 16:42:23

Data Format   = 1D COMPLEX
Dim_Size     = 26214
Dim_Title    = Carbon13
Dim_Units    = [ppm]
Dimensions   = X
Site         = JNM-ECS400
Spectrometer = DELTA2_NMR

Field Strength = 9.389766[T] (400[MHz])
X_Acq_Duration = 1.04333312[s]
X_Domain      = 13C
X_Freq        = 100.52530333[MHz]
X_Offset      = 100[ppm]
X_Points      = 32768
X_Prescans    = 4
X_Resolution  = 0.95846665[Hz]
X_Sweep       = 31.40703518[kHz]
X_Sweep_Clip  = 25.12562814[kHz]
Irr_Domain    = Proton
Irr_Freq      = 399.78219838[MHz]
Irr_Offset    = 5[ppm]
Clipped       = FALSE
Scans         = 128
Total_Scans   = 128

Relaxation_Delay = 1.5[s]
Recvr_Gain       = 50
Temp_Get         = 23.3[dC]
X_90_Width      = 8.7[us]
X_Acq_Time      = 1.04333312[s]
X_Angle         = 30[deg]
X_Atn           = 4[dB]
X_Pulse         = 2.9[us]
Irr_Atn_Dec     = 22.569[dB]
Irr_Atn_No     = 22.569[dB]
Irr_Noise      = WALTZ
Irr_Pwidth     = 0.115[ms]
Decoupling      = TRUE
Initial_Wait    = 1[s]
Noe             = TRUE
Noe Time        = 1.5[s]

```

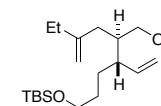

**S3**  
<sup>13</sup>C-NMR  
(100 MHz, CDCl<sub>3</sub>)



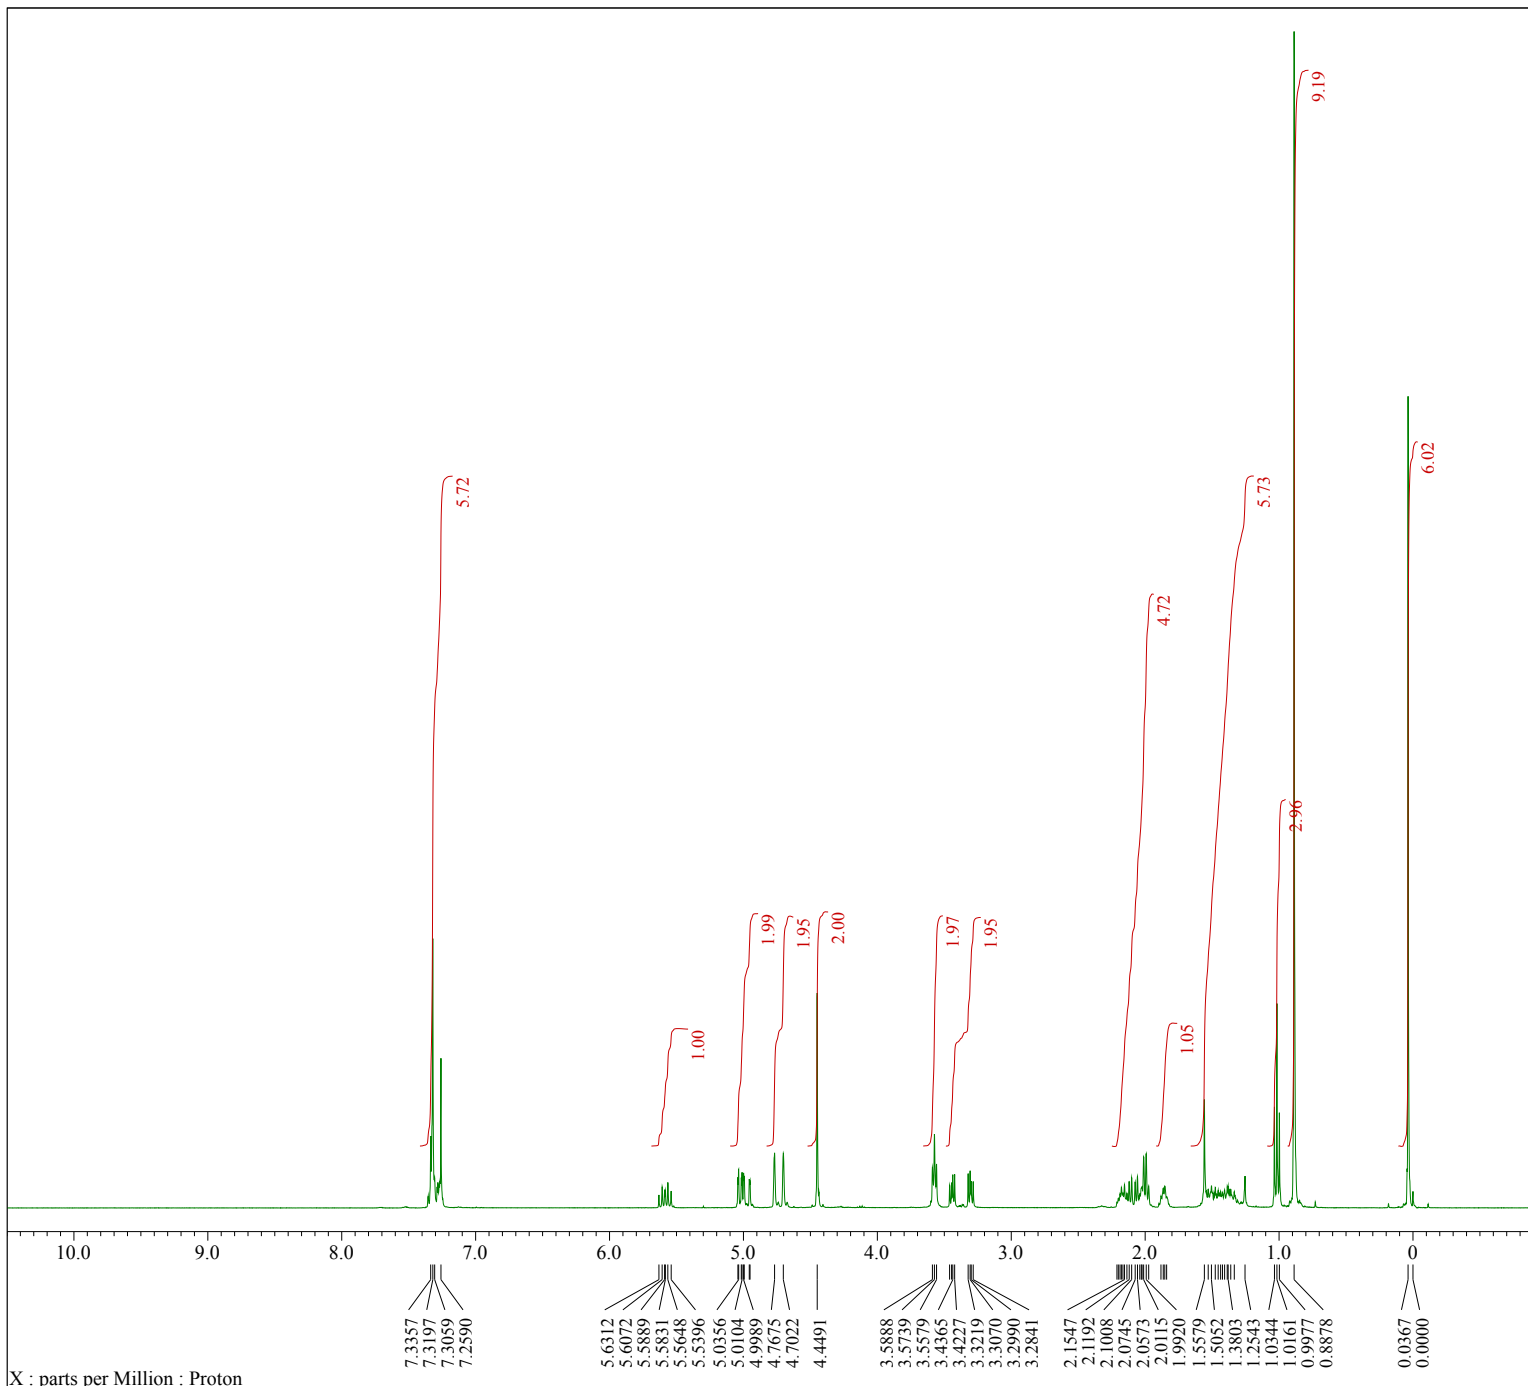

Filename = yk06042\_non-data-1-3.jd  
 Author = delta  
 Experiment = single\_pulse.jxp  
 Sample\_Id = yk06042  
 Solvent = CHLOROFORM-D  
 Creation Time = 11-JAN-2017 21:18:09  
 Revision Time = 20-FEB-2018 19:52:52  
 Current Time = 20-FEB-2018 19:53:21

Data Format = 1D COMPLEX  
 Dim\_Size = 13107  
 Dim\_Title = Proton  
 Dim\_Units = [ppm]  
 Dimensions = X  
 Site = JNM-ECS400  
 Spectrometer = DELTA2\_NMR

Field Strength = 9.389766[T] (400[MHz])  
 X\_Acq\_Duration = 2.18365952[s]  
 X\_Domain = 1H  
 X\_Freq = 399.78219838[MHz]  
 X\_Offset = 5[ppm]  
 X\_Points = 16384  
 X\_Prescans = 1  
 X\_Resolution = 0.45794685[Hz]  
 X\_Sweep = 7.5030012[kHz]  
 X\_Sweep\_Clipped = 6.00240096[kHz]  
 Irr\_Domain = Proton  
 Irr\_Freq = 399.78219838[MHz]  
 Irr\_Offset = 5[ppm]  
 Tri\_Domain = Proton  
 Tri\_Freq = 399.78219838[MHz]  
 Tri\_Offset = 5[ppm]  
 Clipped = FALSE  
 Scans = 16  
 Total\_Scans = 16

Relaxation\_Delay = 5[s]  
 Recvr\_Gain = 40  
 Temp\_Get = 22.1[dC]  
 X\_90\_Width = 10.025[us]  
 X\_Acq\_Time = 2.18365952[s]  
 X\_Angle = 45[deg]  
 X\_Atn = 1[dB]  
 X\_Pulse = 5.0125[us]  
 Irr\_Mode = Off  
 Tri\_Mode = Off  
 DanTe\_Presat = FALSE  
 Initial\_Wait = 1[s]  
 Repetition Time = 7.18365952[s]

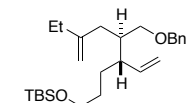

**21**  
<sup>1</sup>H-NMR  
 (400 MHz, CDCl<sub>3</sub>)

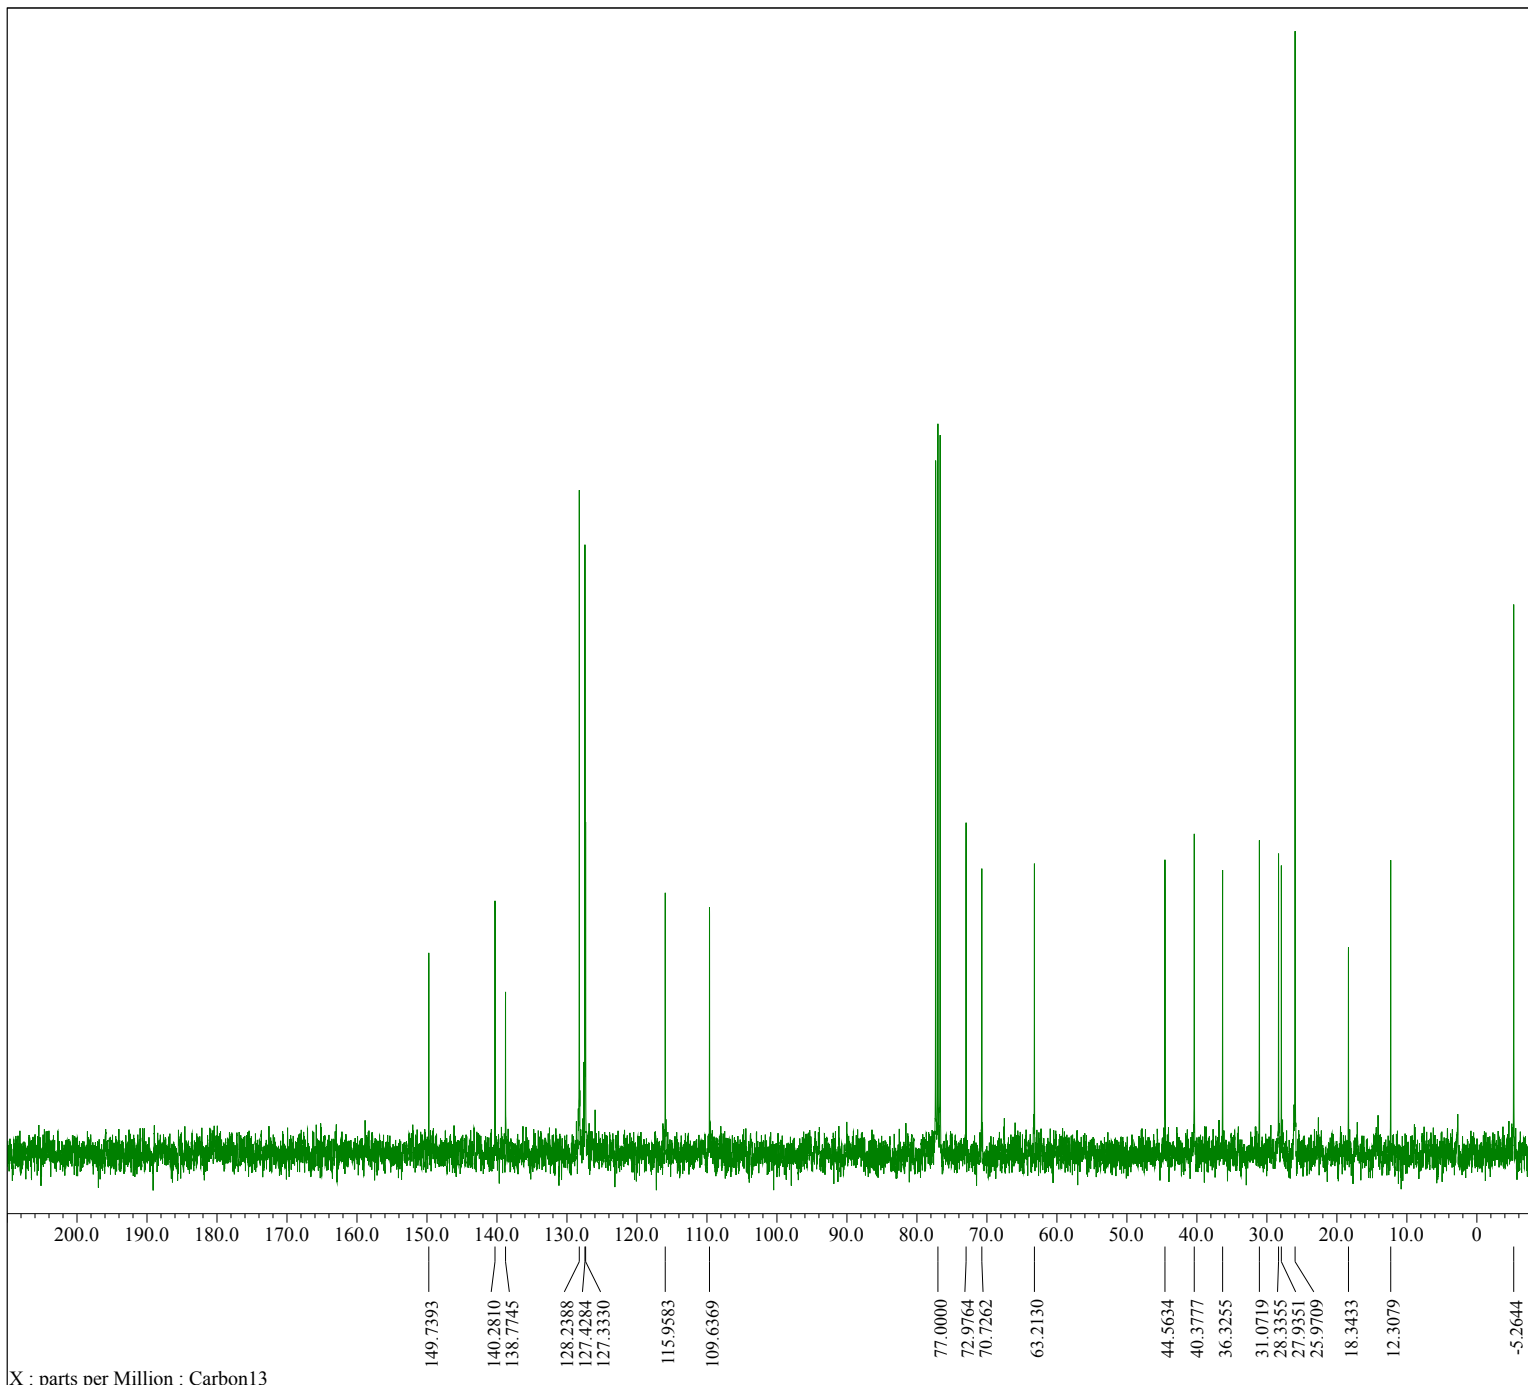

```

Filename      = yk06042data_bcml-3.jdf
Author       = delta
Experiment   = single_pulse_dec.jxp
Sample_Id    = 7
Solvent      = CHLOROFORM-D
Creation Time = 15-JAN-2017 01:04:06
Revision Time = 20-FEB-2018 16:44:27
Current Time  = 20-FEB-2018 16:44:57

Data Format   = 1D COMPLEX
Dim_Size     = 26214
Dim_Title    = Carbon13
Dim_Units    = [ppm]
Dimensions   = X
Site         = JNM-ECS400
Spectrometer = DELTA2_NMR

Field Strength = 9.389766[T] (400[MHz])
X_Acq_Duration = 1.04333312[s]
X_Domain       = 13C
X_Freq         = 100.52530333[MHz]
X_Offset       = 100[ppm]
X_Points       = 32768
X_Prescans     = 4
X_Resolution   = 0.95846665[Hz]
X_Sweep        = 31.40703518[kHz]
X_Sweep_Clippped = 25.12562814[kHz]
Irr_Domain     = Proton
Irr_Freq       = 399.78219838[MHz]
Irr_Offset     = 5[ppm]
Clipped        = FALSE
Scans          = 50
Total_Scans    = 50

Relaxation_Delay = 1.5[s]
Recvr_Gain       = 50
Temp_Get         = 21.4[dC]
X_90_Width      = 8.7[us]
X_Acq_Time      = 1.04333312[s]
X_Angle         = 30[deg]
X_Atn           = 4[dB]
X_Pulse         = 2.9[us]
Irr_Atn_Dec     = 22.569[dB]
Irr_Atn_No     = 22.569[dB]
Irr_Noise       = WALTZ
Irr_Pwidth      = 0.115[ms]
Decoupling      = TRUE
Initial_Wait    = 1[s]
Noe              = TRUE
Noe Time        = 1.5[s]

```

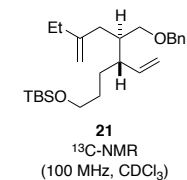

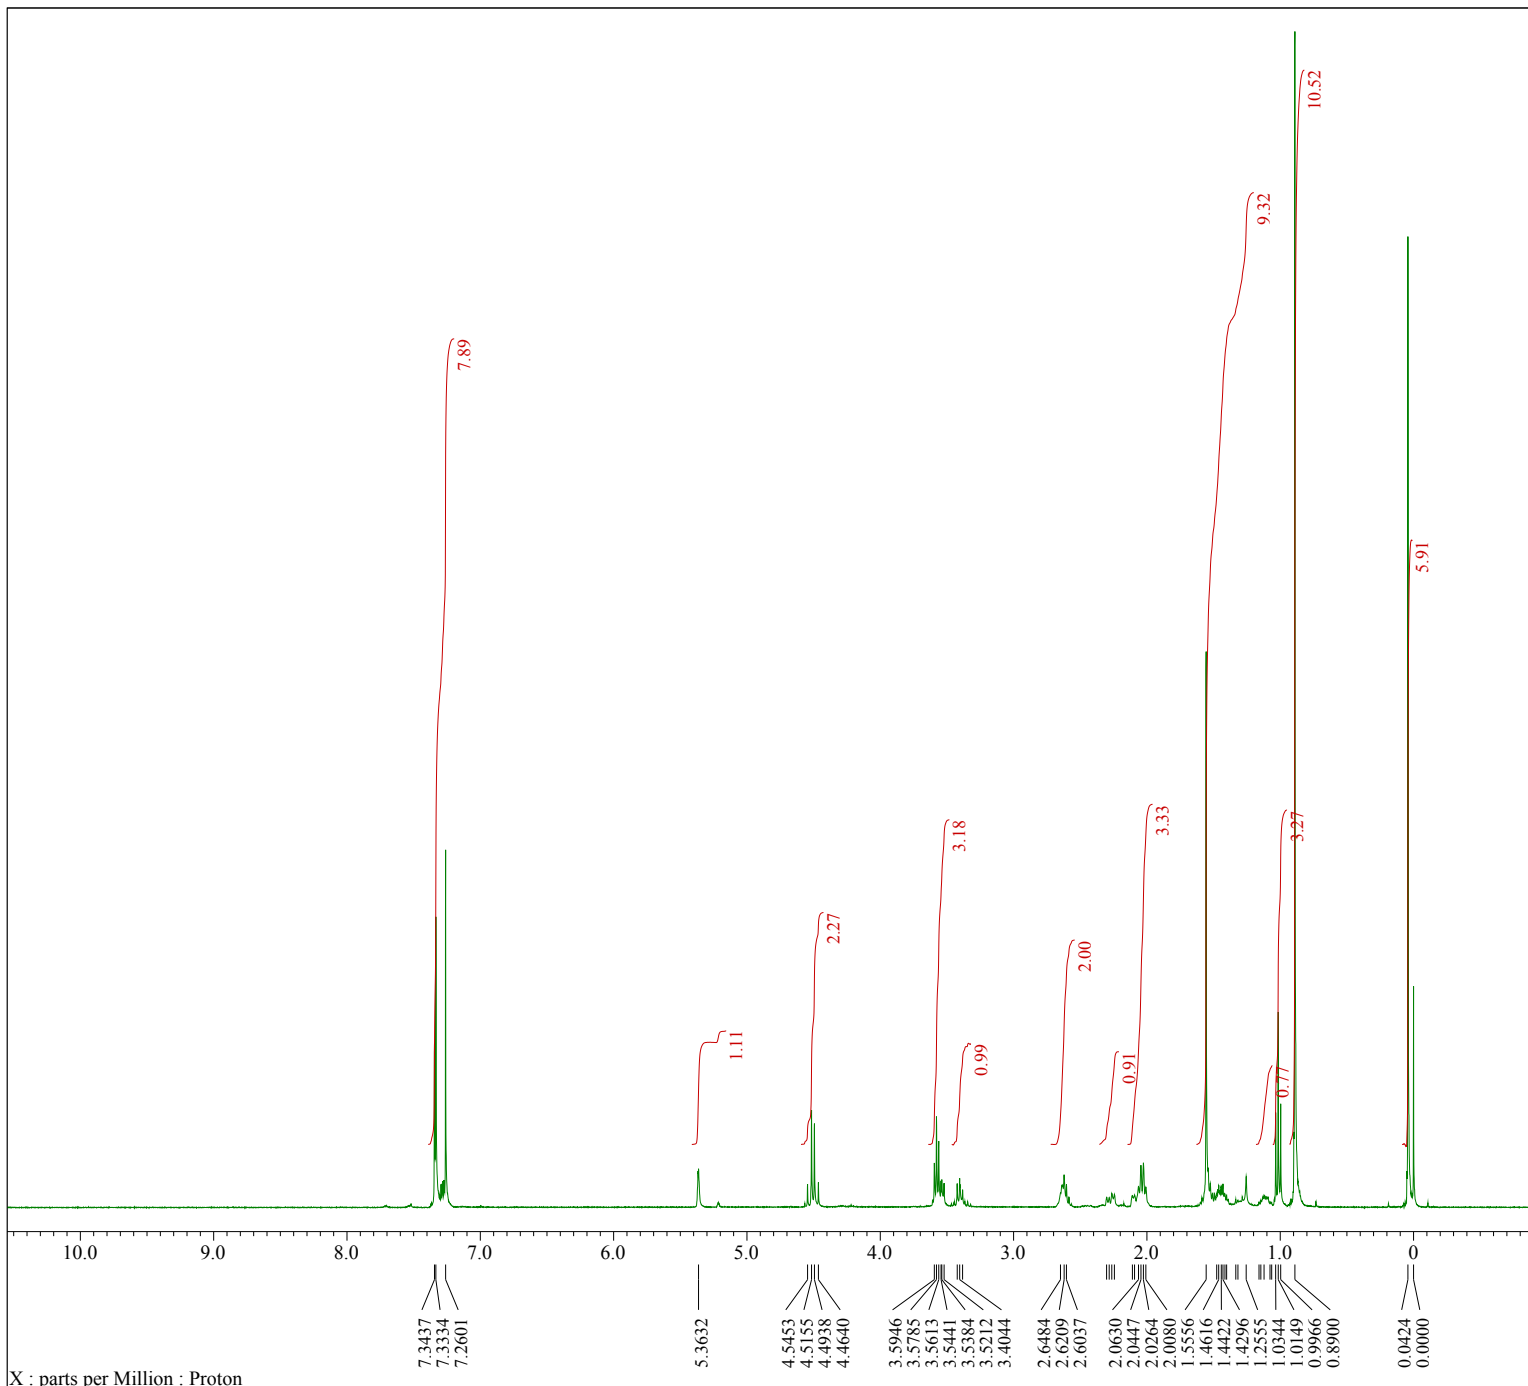

Filename = yk06047data\_non-data-1-  
 Author = delta  
 Experiment = single\_pulse.jxp  
 Sample\_Id = yk05400data  
 Solvent = CHLOROFORM-D  
 Creation Time = 31-OCT-2016 19:24:34  
 Revision Time = 20-FEB-2018 19:56:44  
 Current Time = 20-FEB-2018 19:57:51

Data Format = 1D COMPLEX  
 Dim\_Size = 13107  
 Dim\_Title = Proton  
 Dim\_Units = [ppm]  
 Dimensions = X  
 Site = JNM-ECS400  
 Spectrometer = DELTA2\_NMR

Field Strength = 9.389766[T] (400[MHz])  
 X\_Acq\_Duration = 2.18365952[s]  
 X\_Domain = 1H  
 X\_Freq = 399.78219838[MHz]  
 X\_Offset = 5[ppm]  
 X\_Points = 16384  
 X\_Prescans = 1  
 X\_Resolution = 0.45794685[Hz]  
 X\_Sweep = 7.5030012[kHz]  
 X\_Sweep\_Clippped = 6.00240096[kHz]  
 Irr\_Domain = Proton  
 Irr\_Freq = 399.78219838[MHz]  
 Irr\_Offset = 5[ppm]  
 Tri\_Domain = Proton  
 Tri\_Freq = 399.78219838[MHz]  
 Tri\_Offset = 5[ppm]  
 Clipped = FALSE  
 Scans = 8  
 Total\_Scans = 8

Relaxation\_Delay = 5[s]  
 Recvr\_Gain = 50  
 Temp\_Get = 23.5[dC]  
 X\_90\_Width = 10.025[us]  
 X\_Acq\_Time = 2.18365952[s]  
 X\_Angle = 45[deg]  
 X\_Atn = 1[dB]  
 X\_Pulse = 5.0125[us]  
 Irr\_Mode = Off  
 Tri\_Mode = Off  
 DanTe\_Presat = FALSE  
 Initial\_Wait = 1[s]  
 Repetition Time = 7.18365952[s]

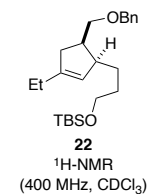

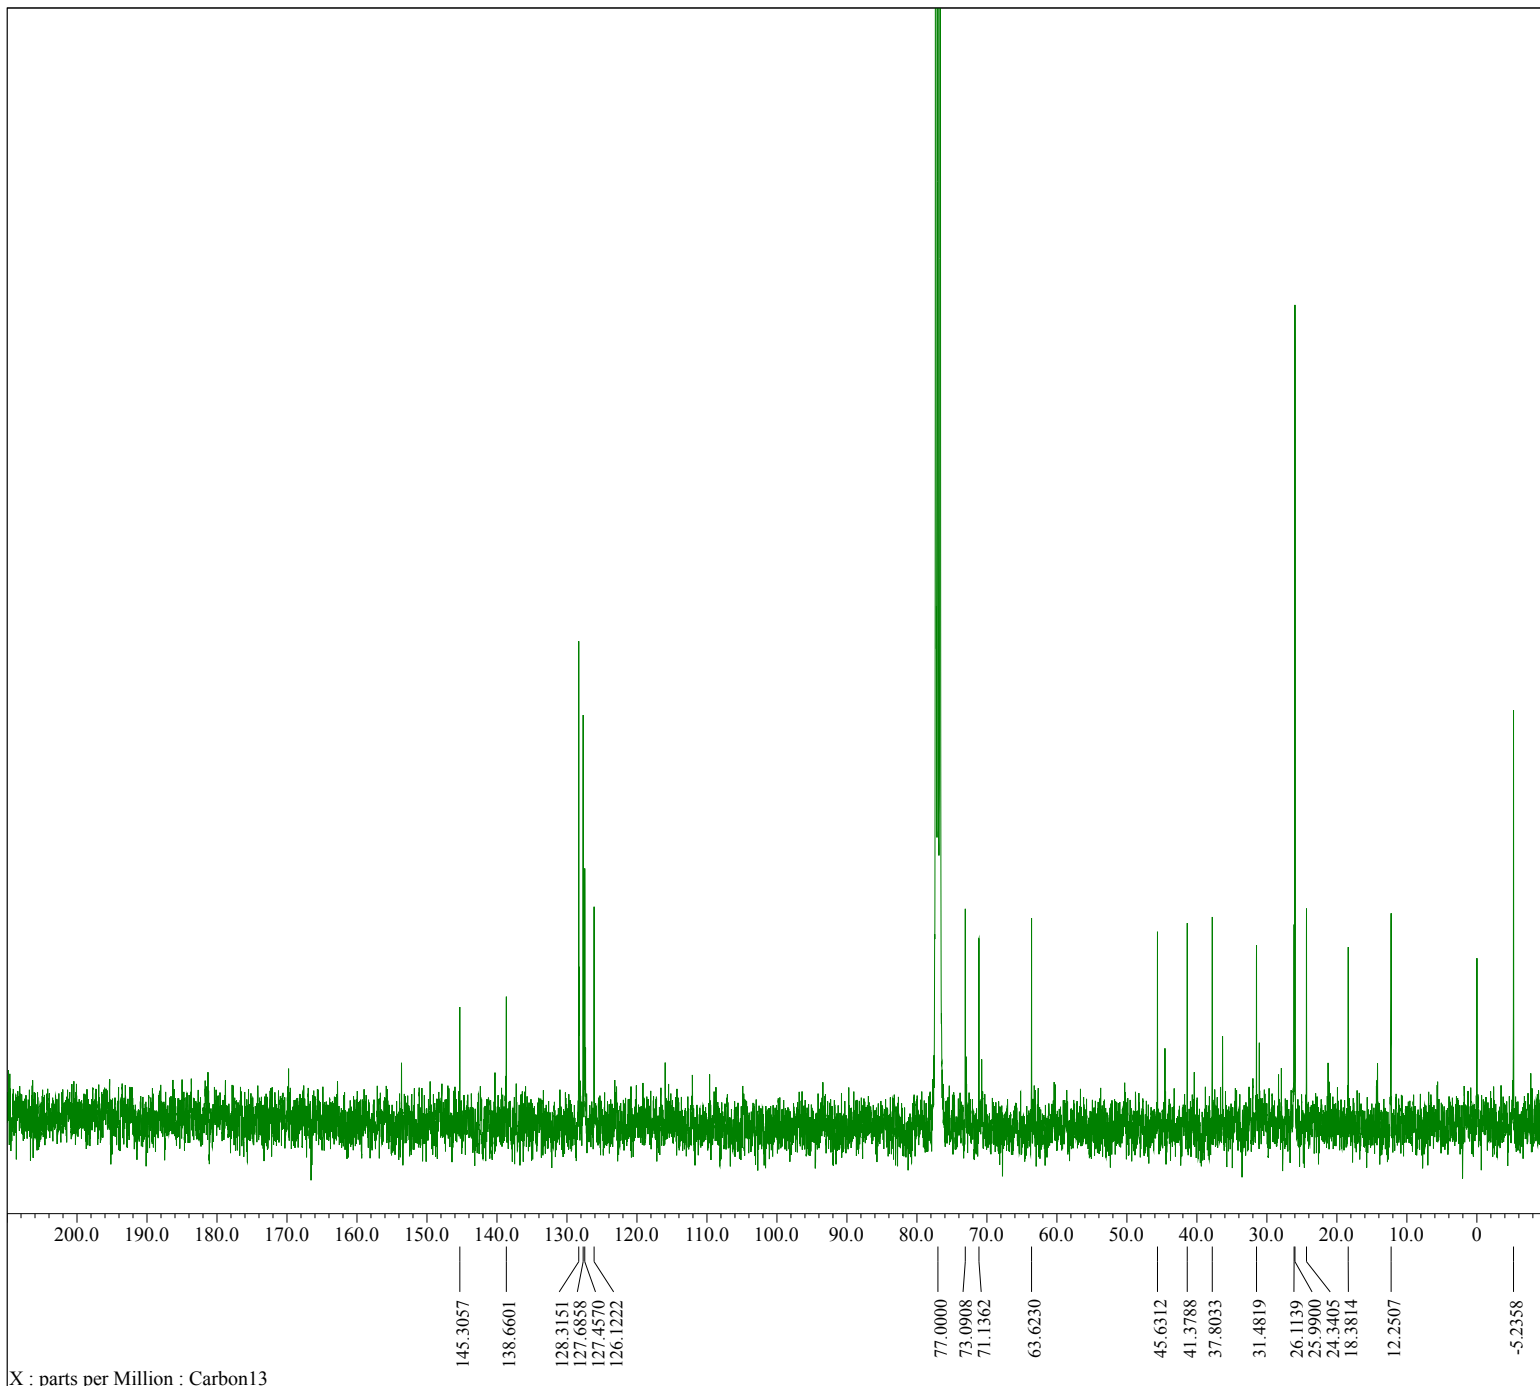

Filename = YK06047data\_bcm-1-3.jcf  
 Author = delta  
 Experiment = single\_pulse\_dec.jxp  
 Sample\_Id = 8  
 Solvent = CHLOROFORM-D  
 Creation Time = 15-JAN-2017 04:37:02  
 Revision Time = 20-FEB-2018 16:47:34  
 Current Time = 20-FEB-2018 16:48:23

Data Format = 1D COMPLEX  
 Dim\_Size = 26214  
 Dim Title = Carbon13  
 Dim Units = [ppm]  
 Dimensions = X  
 Site = JNM-ECS400  
 Spectrometer = DELTA2\_NMR

Field Strength = 9.389766[T] (400[MHz])  
 X\_Acq\_Duration = 1.04333312[s]  
 X\_Domain = 13C  
 X\_Freq = 100.52530333[MHz]  
 X\_Offset = 100[ppm]  
 X\_Points = 32768  
 X\_Prescans = 4  
 X\_Resolution = 0.95846665[Hz]  
 X\_Sweep = 31.40703518[kHz]  
 X\_Sweep\_Clippped = 25.12562814[kHz]  
 Irr\_Domain = Proton  
 Irr\_Freq = 399.78219838[MHz]  
 Irr\_Offset = 5[ppm]  
 Clipped = FALSE  
 Scans = 5321  
 Total\_Scans = 5321

Relaxation\_Delay = 1.5[s]  
 Recvr\_Gain = 50  
 Temp\_Get = 21.1[dC]  
 X\_90\_Width = 8.7[us]  
 X\_Acq Time = 1.04333312[s]  
 X\_Angle = 30[deg]  
 X\_Atn = 4[dB]  
 X\_Pulse = 2.9[us]  
 Irr\_Atn\_Dec = 22.569[dB]  
 Irr\_Atn\_Noie = 22.569[dB]  
 Irr\_Noise = WALTZ  
 Irr\_Pwidth = 0.115[ms]  
 Decoupling = TRUE  
 Initial\_Wait = 1[s]  
 Noe = TRUE  
 Noe Time = 1.5[s]

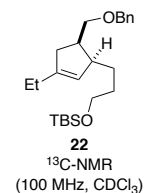

X : parts per Million : Carbon13

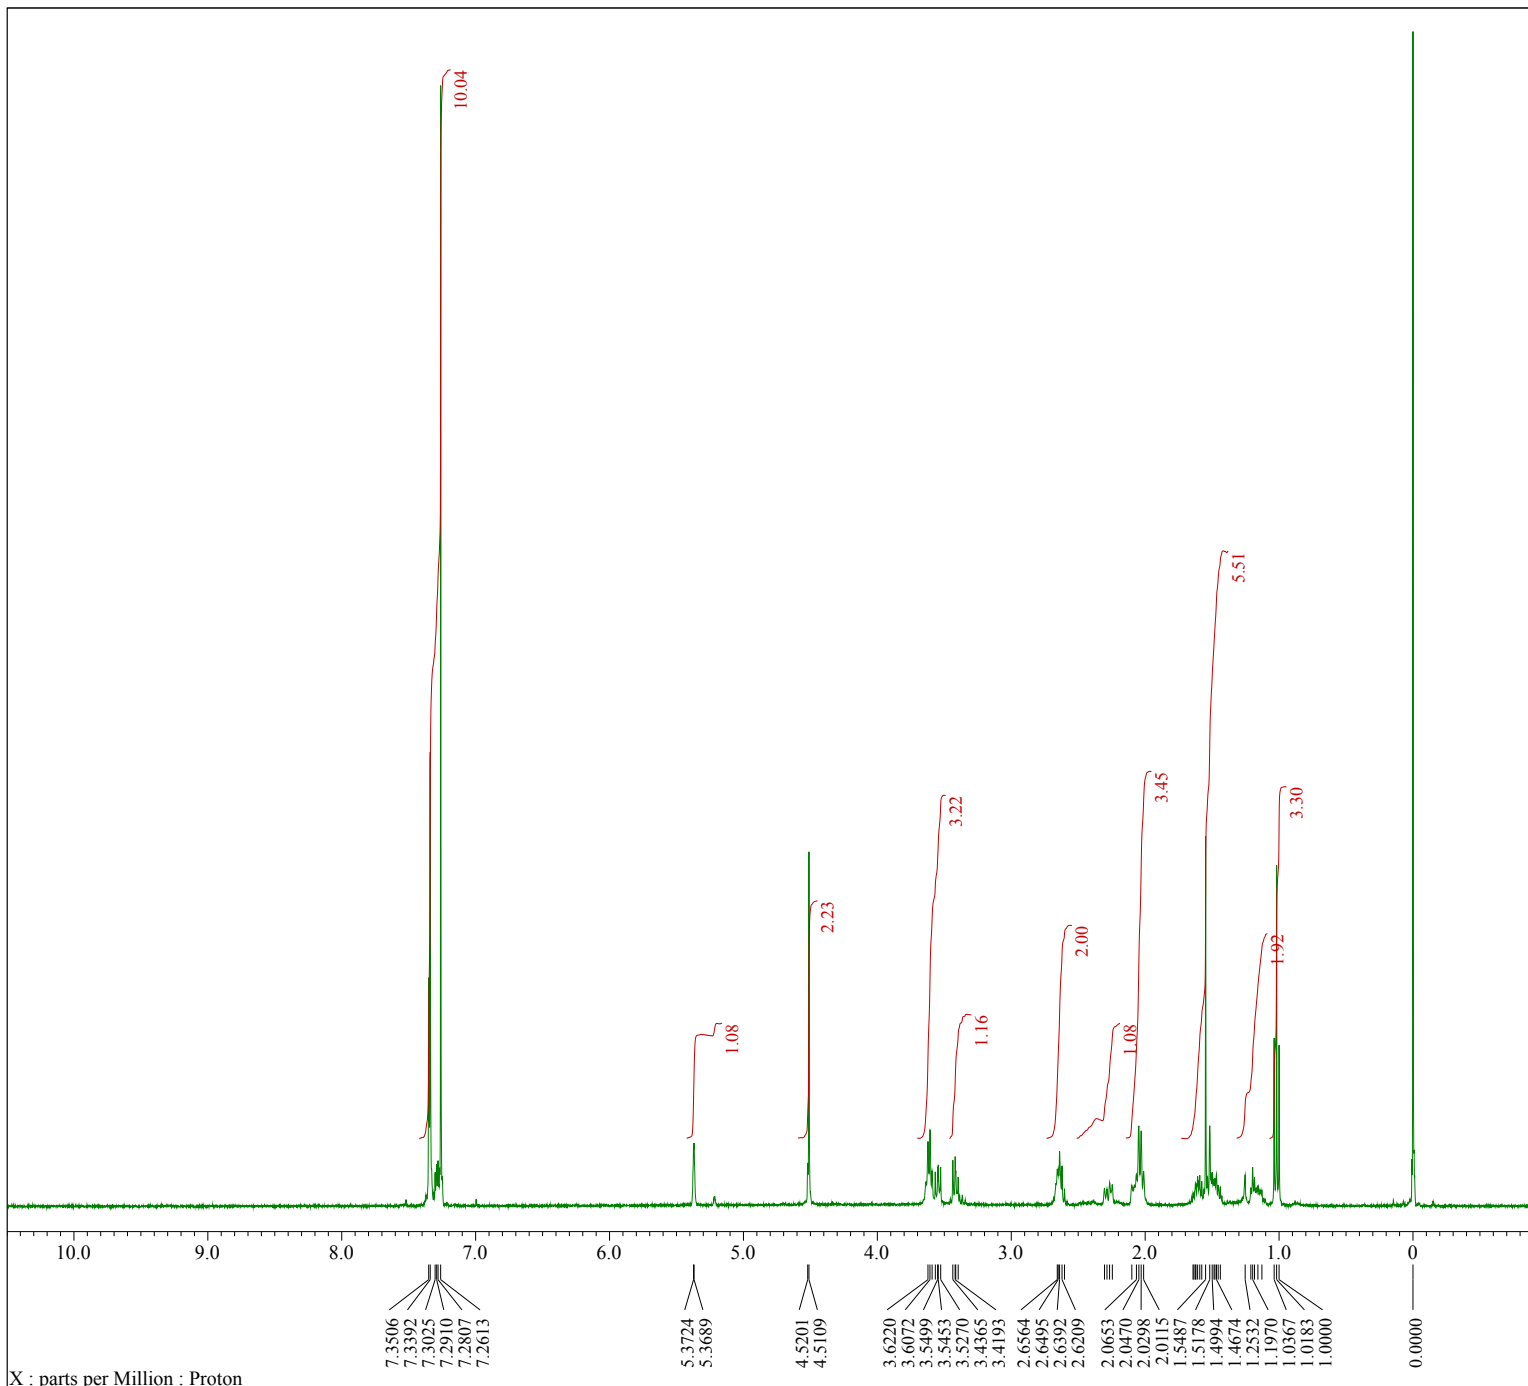

Filename = yk06052data\_non-data-1-  
 Author = delta  
 Experiment = single\_pulse.jxp  
 Sample\_Id = yk06052data  
 Solvent = CHLOROFORM-D  
 Creation Time = 11-DEC-2016 16:14:22  
 Revision Time = 20-FEB-2018 20:01:24  
 Current Time = 20-FEB-2018 20:01:50

Data Format = 1D COMPLEX  
 Dim\_Size = 13107  
 Dim\_Title = Proton  
 Dim\_Units = [ppm]  
 Dimensions = X  
 Site = JNM-ECS400  
 Spectrometer = DELTA2\_NMR

Field Strength = 9.389766[T] (400[MHz])  
 X\_Acq\_Duration = 2.18365952[s]  
 X\_Domain = 1H  
 X\_Freq = 399.78219838[MHz]  
 X\_Offset = 5[ppm]  
 X\_Points = 16384  
 X\_Prescans = 1  
 X\_Resolution = 0.45794685[Hz]  
 X\_Sweep = 7.5030012[kHz]  
 X\_Sweep\_Clippped = 6.00240096[kHz]  
 Irr\_Domain = Proton  
 Irr\_Freq = 399.78219838[MHz]  
 Irr\_Offset = 5[ppm]  
 Tri\_Domain = Proton  
 Tri\_Freq = 399.78219838[MHz]  
 Tri\_Offset = 5[ppm]  
 Clipped = FALSE  
 Scans = 8  
 Total\_Scans = 8

Relaxation\_Delay = 5[s]  
 Recvr\_Gain = 50  
 Temp\_Get = 22.4[dC]  
 X\_90\_Width = 10.025[us]  
 X\_Acq\_Time = 2.18365952[s]  
 X\_Angle = 45[deg]  
 X\_Atn = 1[dB]  
 X\_Pulse = 5.0125[us]  
 Irr\_Mode = Off  
 Tri\_Mode = Off  
 DanTe\_Presat = FALSE  
 Initial\_Wait = 1[s]  
 Repetition Time = 7.18365952[s]

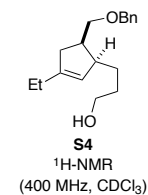

X : parts per Million : Proton

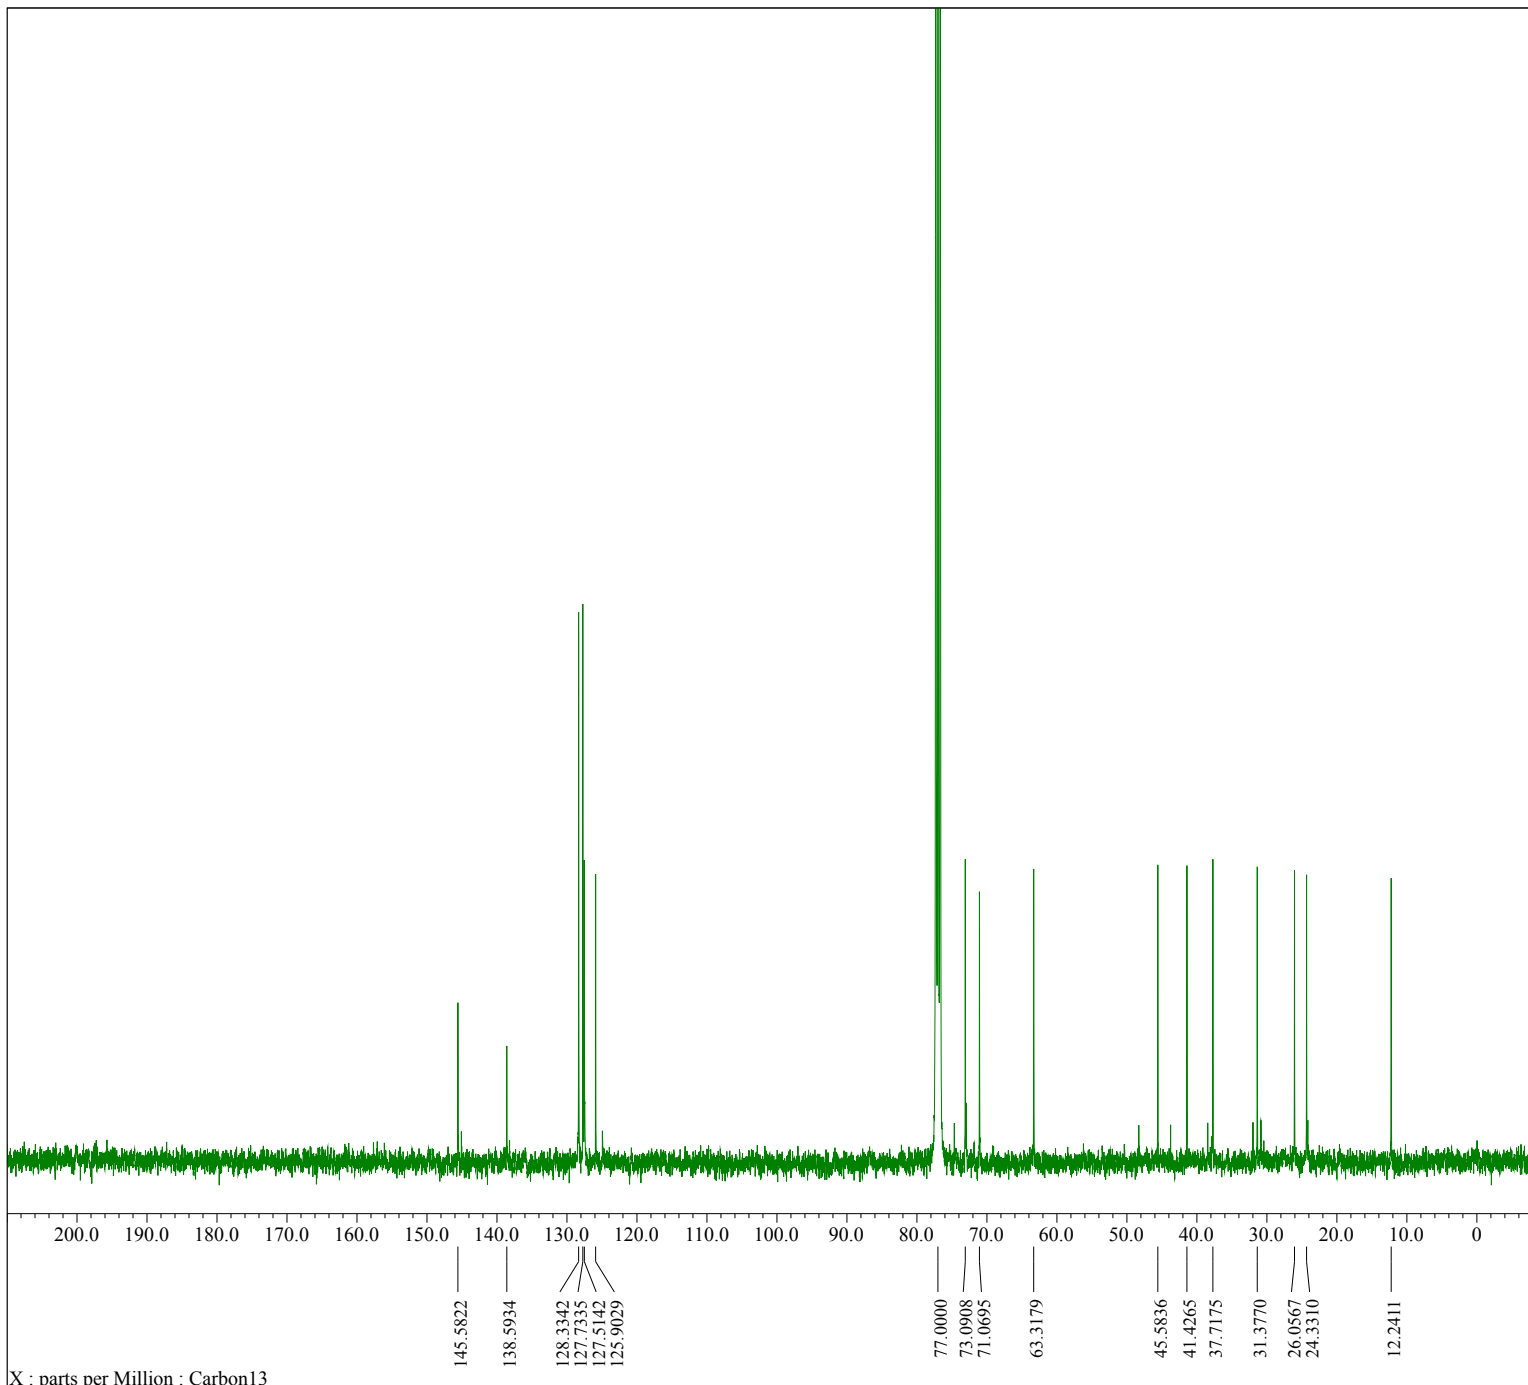

```

Filename      = yk06052data_bcm-1-3.jdf
Author       = delta
Experiment   = single_pulse_dec.jxp
Sample_Id    = yk06052data
Solvent      = CHLOROFORM-D
Creation Time = 9-NOV-2016 01:03:53
Revision Time = 20-FEB-2018 16:50:20
Current Time  = 20-FEB-2018 16:51:21

Data Format   = 1D COMPLEX
Dim_Size     = 26214
Dim_Title    = Carbon13
Dim_Units    = [ppm]
Dimensions   = X
Site         = JNM-ECS400
Spectrometer = DELTA2_NMR

Field Strength = 9.389766[T] (400[MHz])
X_Acq_Duration = 1.04333312[s]
X_Domain      = 13C
X_Freq        = 100.52530333[MHz]
X_Offset      = 100[ppm]
X_Points      = 32768
X_Prescans    = 4
X_Resolution  = 0.95846665[Hz]
X_Sweep       = 31.40703518[kHz]
X_Sweep_Clippped = 25.12562814[kHz]
Irr_Domain    = Proton
Irr_Freq      = 399.78219838[MHz]
Irr_Offset    = 5[ppm]
Clipped       = FALSE
Scans         = 5000
Total_Scans   = 5000

Relaxation_Delay = 1.5[s]
Recvr_Gain       = 50
Temp_Get         = 23.3[dC]
X_90_Width      = 8.7[us]
X_Acq_Time       = 1.04333312[s]
X_Angle         = 30[deg]
X_Atn           = 4[dB]
X_Pulse         = 2.9[us]
Irr_Atn_Dec     = 22.569[dB]
Irr_Atn_No     = 22.569[dB]
Irr_Noise       = WALTZ
Irr_Pwidth      = 0.115[ms]
Decoupling      = TRUE
Initial_Wait    = 1[s]
Noe              = TRUE
Noe Time        = 1.5[s]
  
```

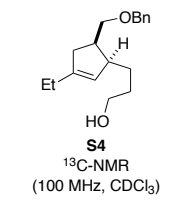

X : parts per Million : Carbon13

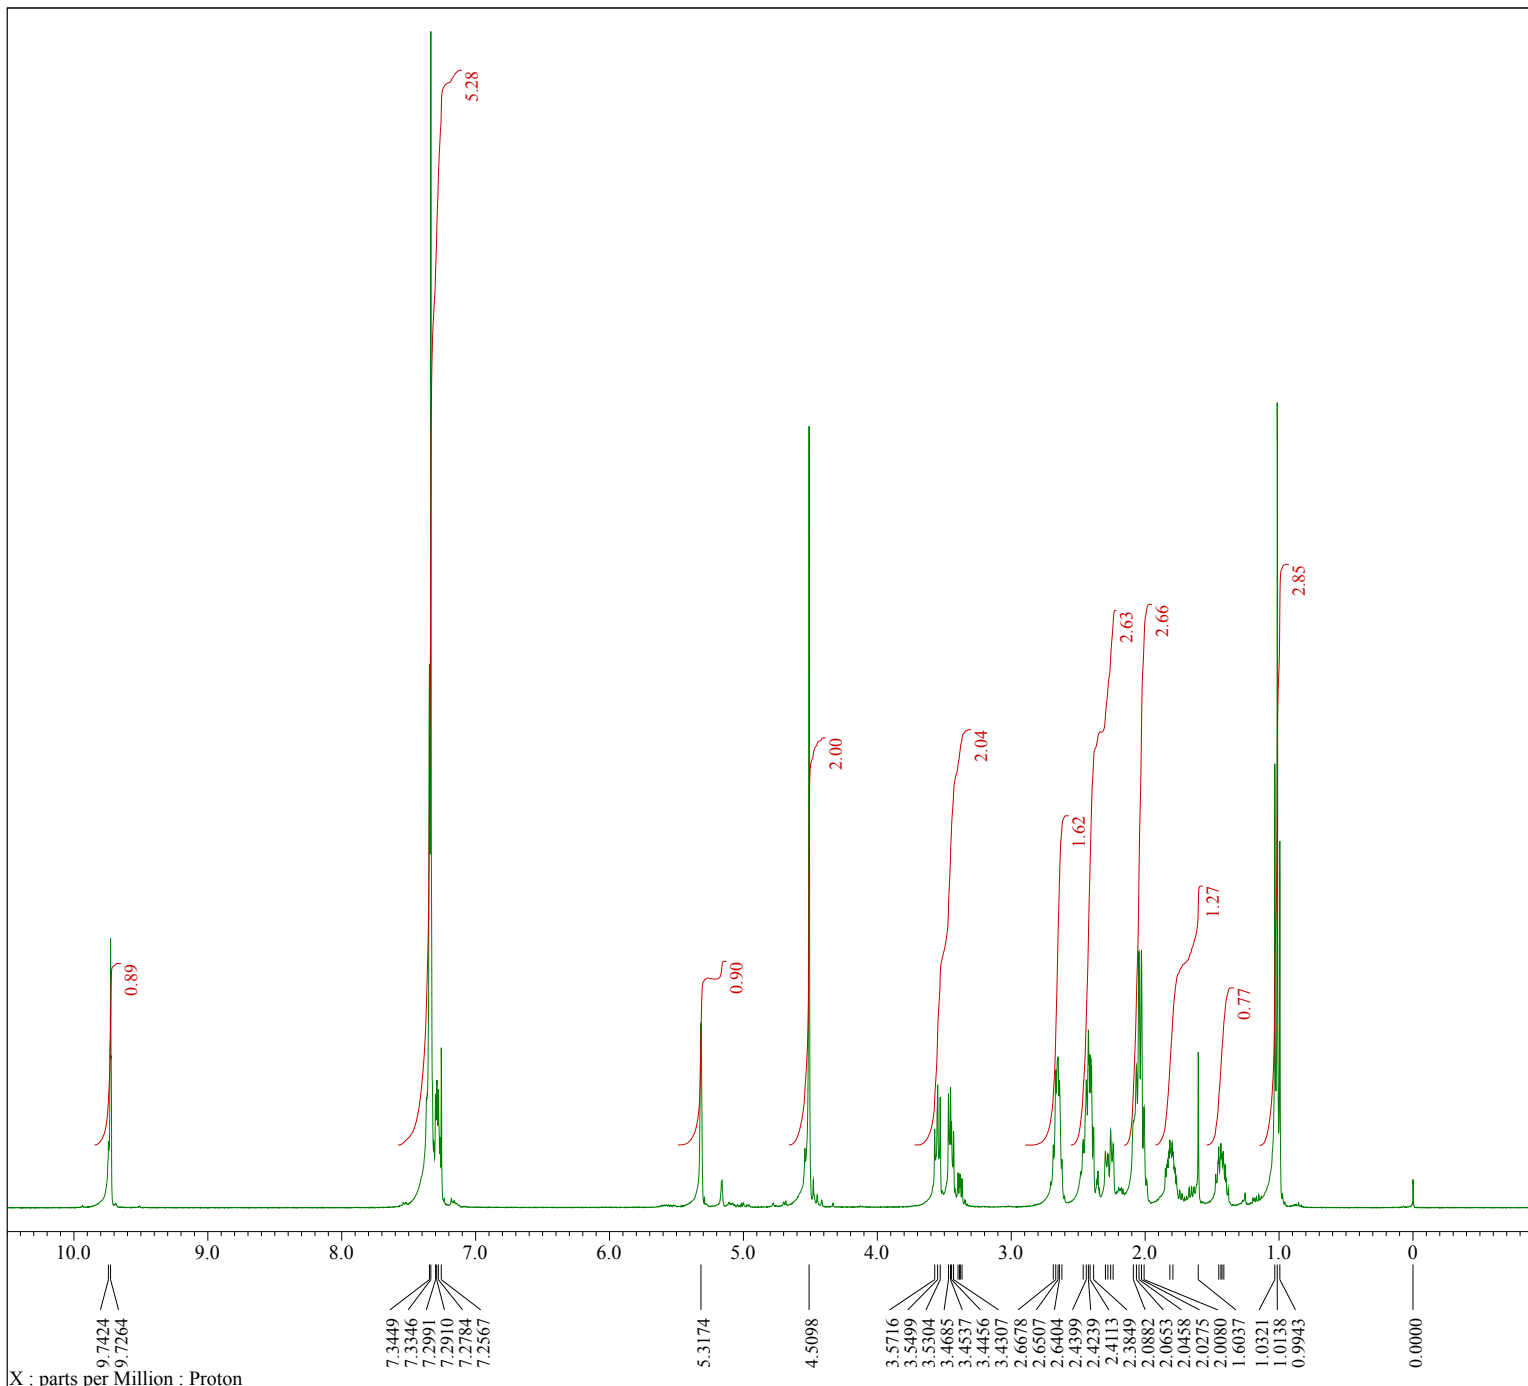

Filename = yk06058data\_non-data-1-  
 Author = delta  
 Experiment = single\_pulse.jxp  
 Sample\_Id = yk06058data  
 Solvent = CHLOROFORM-D  
 Creation Time = 9-NOV-2016 15:27:50  
 Revision Time = 20-FEB-2018 20:09:39  
 Current Time = 20-FEB-2018 20:10:14

Data Format = 1D COMPLEX  
 Dim\_Size = 13107  
 Dim\_Title = Proton  
 Dim\_Units = [ppm]  
 Dimensions = X  
 Site = JNM-ECS400  
 Spectrometer = DELTA2\_NMR

Field Strength = 9.389766[T] (400[MHz])  
 X\_Acq\_Duration = 2.18365952[s]  
 X\_Domain = 1H  
 X\_Freq = 399.78219838[MHz]  
 X\_Offset = 5[ppm]  
 X\_Points = 16384  
 X\_Prescans = 1  
 X\_Resolution = 0.45794685[Hz]  
 X\_Sweep = 7.5030012[kHz]  
 X\_Sweep\_Clipped = 6.00240096[kHz]  
 Irr\_Domain = Proton  
 Irr\_Freq = 399.78219838[MHz]  
 Irr\_Offset = 5[ppm]  
 Tri\_Domain = Proton  
 Tri\_Freq = 399.78219838[MHz]  
 Tri\_Offset = 5[ppm]  
 Clipped = FALSE  
 Scans = 8  
 Total\_Scans = 8

Relaxation\_Delay = 5[s]  
 Recvr\_Gain = 32  
 Temp\_Get = 23.3[dC]  
 X\_90\_Width = 10.025[us]  
 X\_Acq\_Time = 2.18365952[s]  
 X\_Angle = 45[deg]  
 X\_Atn = 1[dB]  
 X\_Pulse = 5.0125[us]  
 Irr\_Mode = Off  
 Tri\_Mode = Off  
 DanTe\_Presat = FALSE  
 Initial\_Wait = 1[s]  
 Repetition Time = 7.18365952[s]

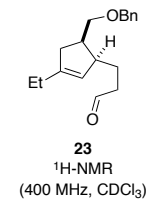

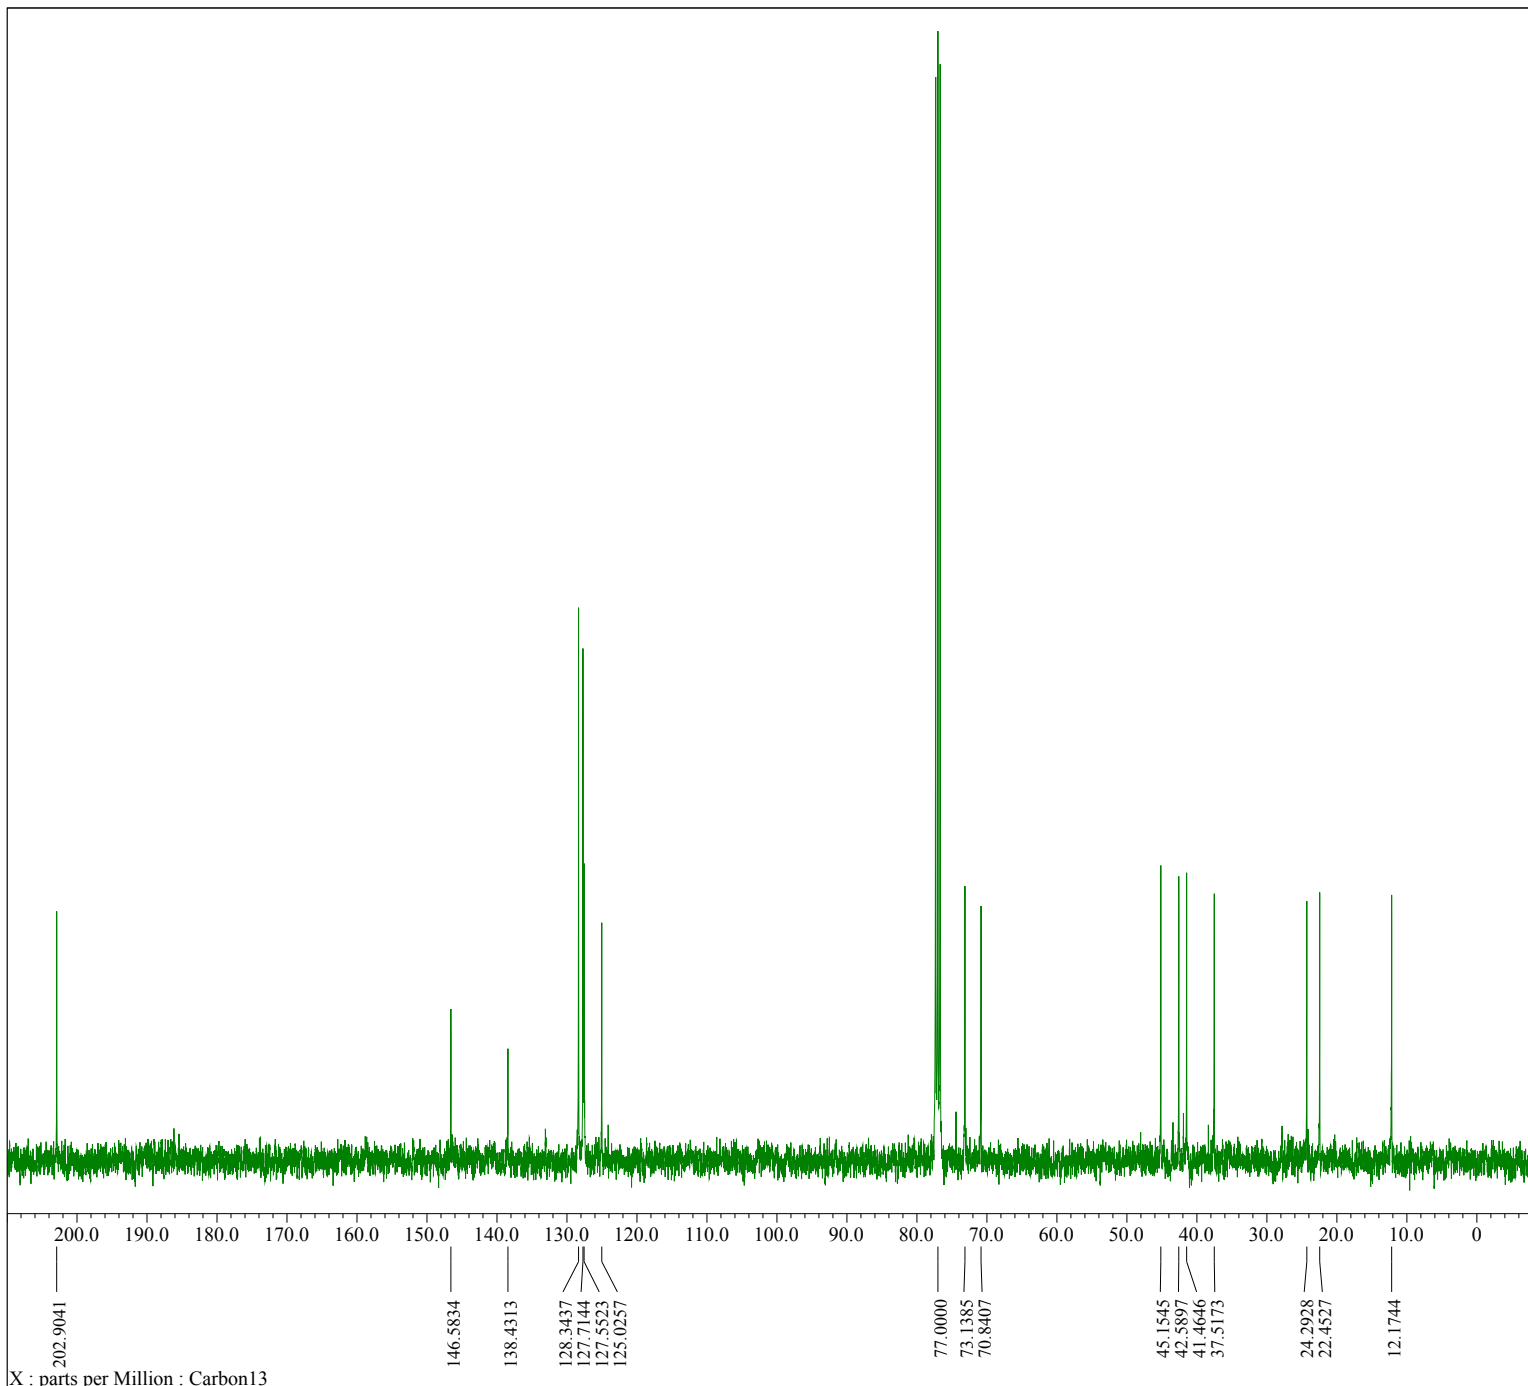

```

Filename      = yk06058data_bcm-1-3.jcf
Author       = delta
Experiment   = single_pulse_dec.jxp
Sample_Id    = yk06058data
Solvent      = CHLOROFORM-D
Creation Time = 9-NOV-2016 15:31:19
Revision Time = 20-FEB-2018 16:52:45
Current Time  = 20-FEB-2018 16:53:14

Data Format   = 1D COMPLEX
Dim_Size     = 26214
Dim_Title    = Carbon13
Dim_Units    = [ppm]
Dimensions   = X
Site         = JNM-ECS400
Spectrometer = DELTA2_NMR

Field Strength = 9.389766[T] (400[MHz])
X_Acq_Duration = 1.04333312[s]
X_Domain       = 13C
X_Freq         = 100.52530333[MHz]
X_Offset       = 100[ppm]
X_Points       = 32768
X_Prescans     = 4
X_Resolution   = 0.95846665[Hz]
X_Sweep        = 31.40703518[kHz]
X_Sweep_Clippped = 25.12562814[kHz]
Irr_Domain     = Proton
Irr_Freq       = 399.78219838[MHz]
Irr_Offset     = 5[ppm]
Clipped        = FALSE
Scans          = 128
Total_Scans    = 128

Relaxation_Delay = 1.5[s]
Recvr_Gain       = 50
Temp_Get         = 23.4[dC]
X_90_Width      = 8.7[us]
X_Acq_Time      = 1.04333312[s]
X_Angle         = 30[deg]
X_Atn           = 4[dB]
X_Pulse         = 2.9[us]
Irr_Atn_Dec     = 22.569[dB]
Irr_Atn_Noise  = 22.569[dB]
Irr_Noise       = WALTZ
Irr_Pwidth      = 0.115[ms]
Decoupling      = TRUE
Initial_Wait    = 1[s]
Noe              = TRUE
Noe Time        = 1.5[s]

```

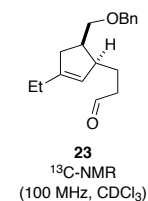



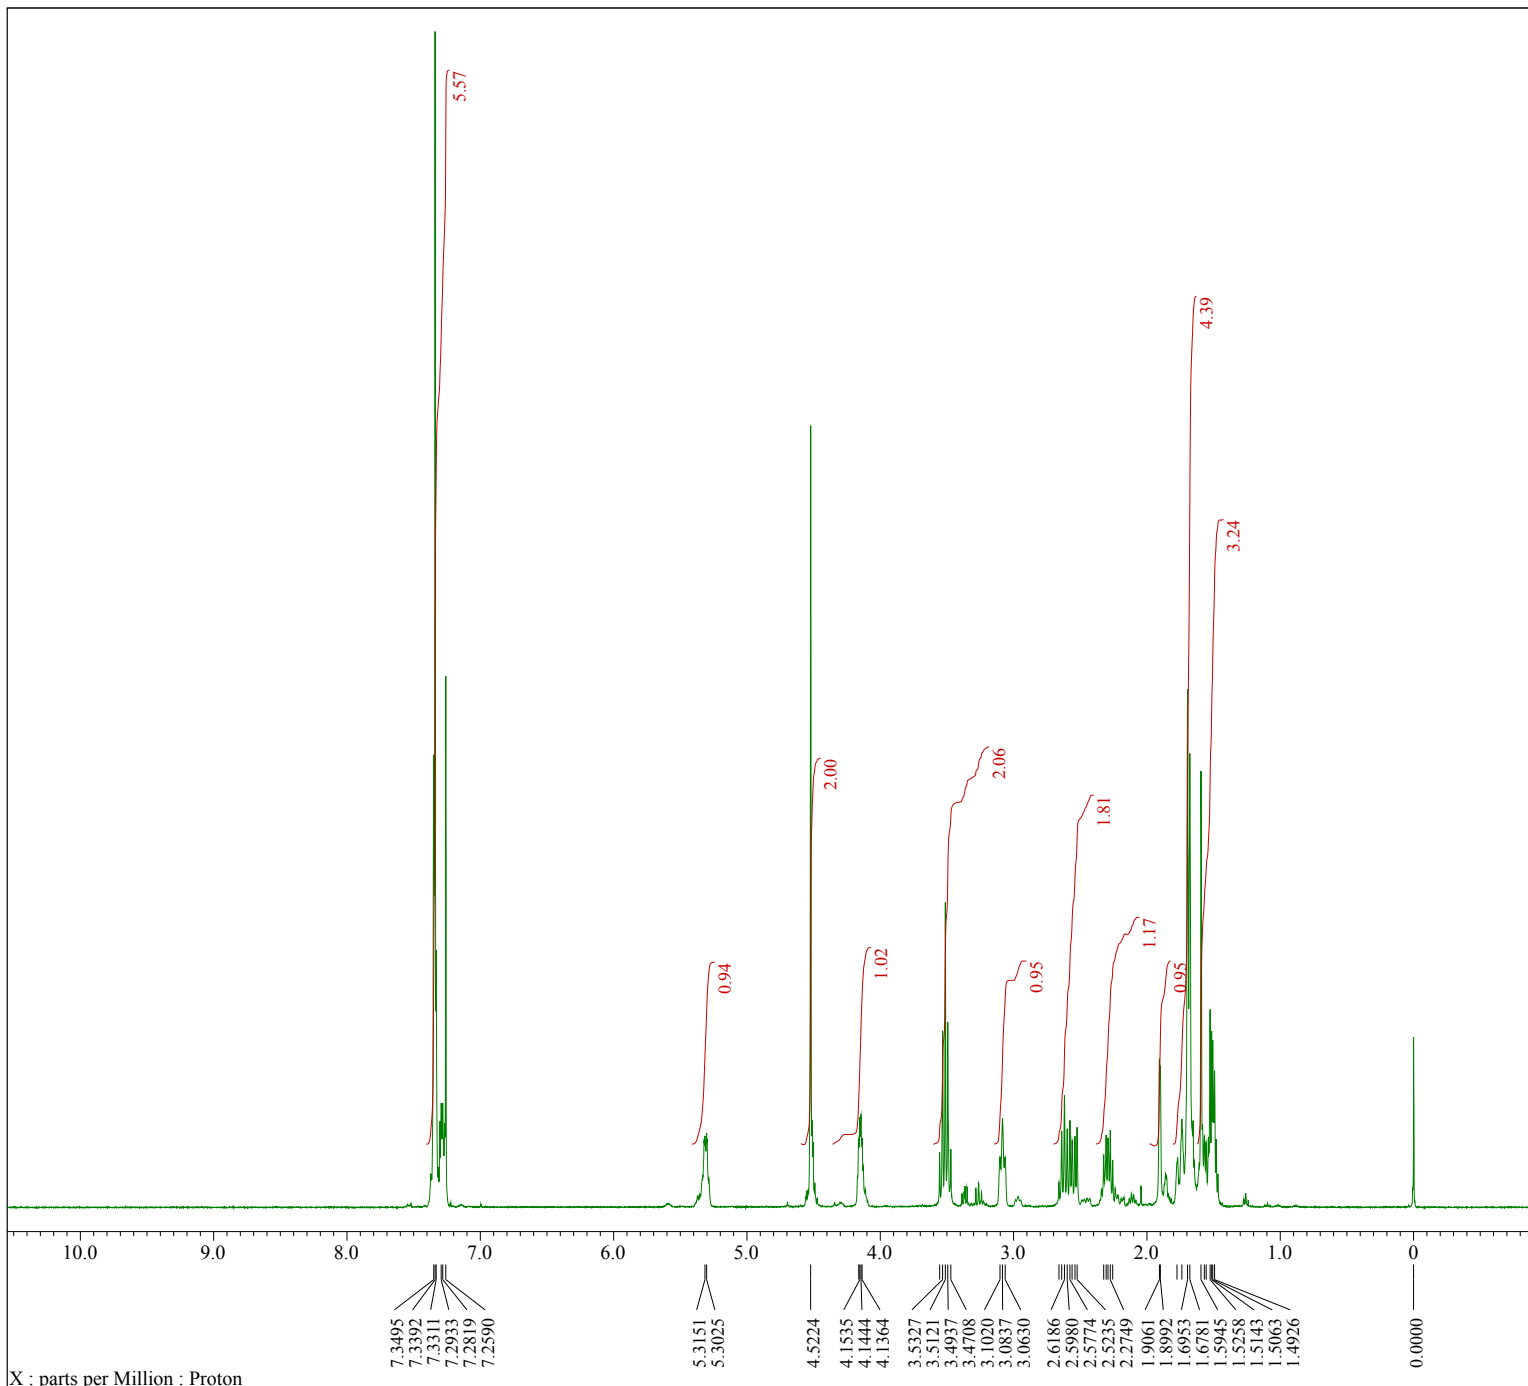

X : parts per Million : Proton

Filename = yk06065\_non-data-1-3.jd  
 Author = delta  
 Experiment = single\_pulse.jxp  
 Sample\_Id = yk06065  
 Solvent = CHLOROFORM-D  
 Creation Time = 2-NOV-2016 23:15:55  
 Revision Time = 20-FEB-2018 20:13:18  
 Current Time = 20-FEB-2018 20:13:59

Data Format = 1D COMPLEX  
 Dim\_Size = 13107  
 Dim Title = Proton  
 Dim Units = [ppm]  
 Dimensions = X  
 Site = JNM-ECS400  
 Spectrometer = DELTA2\_NMR

Field Strength = 9.389766[T] (400[MHz])  
 X\_Acq\_Duration = 2.18365952[s]  
 X\_Domain = 1H  
 X\_Freq = 399.78219838[MHz]  
 X\_Offset = 5[ppm]  
 X\_Points = 16384  
 X\_Prescans = 1  
 X\_Resolution = 0.45794685[Hz]  
 X\_Sweep = 7.5030012[kHz]  
 X\_Sweep\_Clippped = 6.00240096[kHz]  
 Irr\_Domain = Proton  
 Irr\_Freq = 399.78219838[MHz]  
 Irr\_Offset = 5[ppm]  
 Tri\_Domain = Proton  
 Tri\_Freq = 399.78219838[MHz]  
 Tri\_Offset = 5[ppm]  
 Clipped = FALSE  
 Scans = 8  
 Total\_Scans = 8

Relaxation\_Delay = 5[s]  
 Recvr\_Gain = 40  
 Temp\_Get = 23[dC]  
 X\_90\_Width = 10.025[us]  
 X\_Acq\_Time = 2.18365952[s]  
 X\_Angle = 45[deg]  
 X\_Atn = 1[dB]  
 X\_Pulse = 5.0125[us]  
 Irr\_Mode = Off  
 Tri\_Mode = Off  
 Dante\_Presat = FALSE  
 Initial\_Wait = 1[s]  
 Repetition Time = 7.18365952[s]

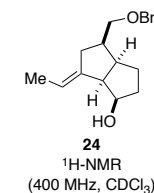

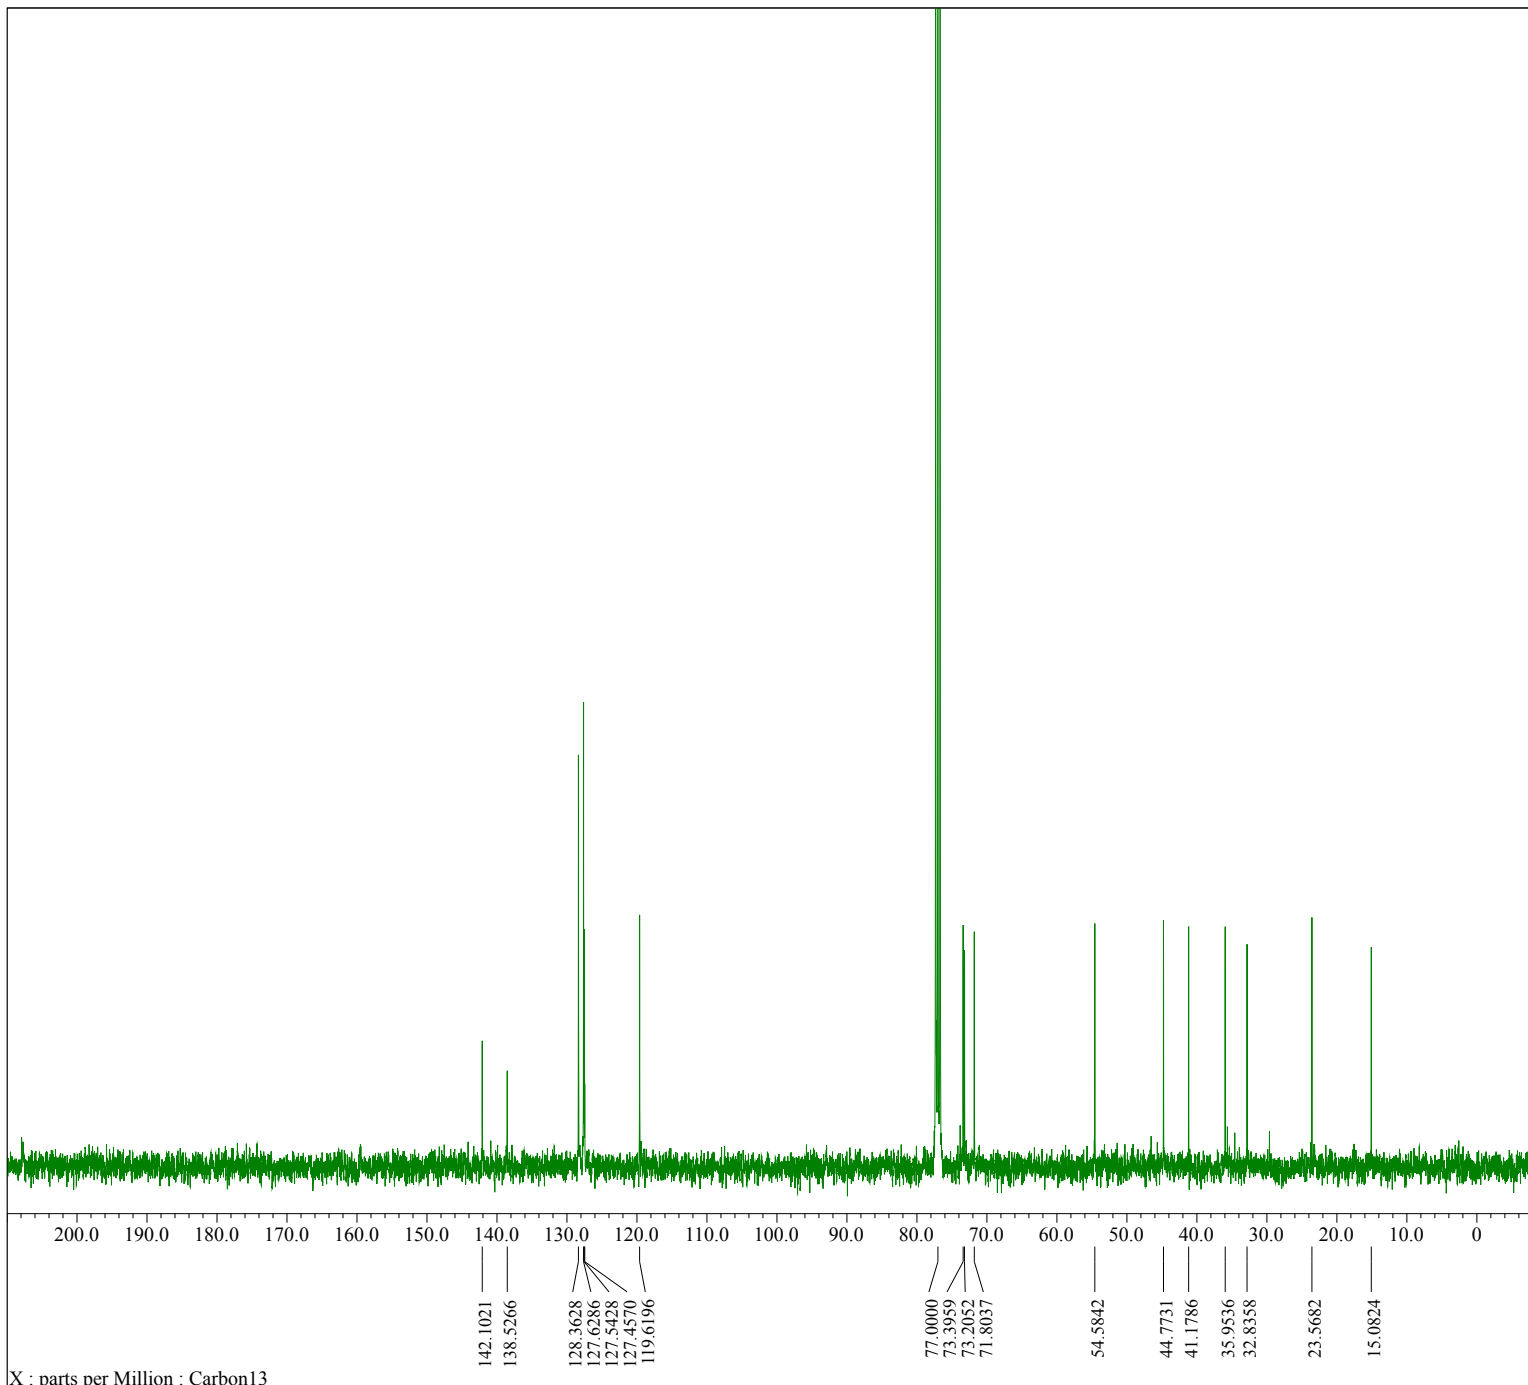

```

Filename      = yk06065_bcm-2-3.jdf
Author       = delta
Experiment   = single_pulse_dec.jxp
Sample_Id    = yk06065
Solvent      = CHLOROFORM-D
Creation Time = 2-NOV-2016 23:35:43
Revision Time = 20-FEB-2018 16:54:43
Current Time  = 20-FEB-2018 16:55:18

Data Format   = 1D COMPLEX
Dim_Size     = 26214
Dim_Title    = Carbon13
Dim_Units    = [ppm]
Dimensions   = X
Site         = JNM-ECS400
Spectrometer = DELTA2_NMR

Field Strength = 9.389766[T] (400[MHz])
X_Acq_Duration = 1.04333312[s]
X_Domain      = 13C
X_Freq        = 100.52530333[MHz]
X_Offset      = 100[ppm]
X_Points      = 32768
X_Prescans    = 4
X_Resolution  = 0.95846665[Hz]
X_Sweep       = 31.40703518[kHz]
X_Sweep_Clip  = 25.12562814[kHz]
Irr_Domain    = Proton
Irr_Freq      = 399.78219838[MHz]
Irr_Offset    = 5[ppm]
Clipped       = FALSE
Scans         = 512
Total_Scans   = 512

Relaxation_Delay = 1.5[s]
Recvr_Gain       = 50
Temp_Get         = 23.4[dC]
X_90_Width      = 8.7[us]
X_Acq_Time      = 1.04333312[s]
X_Angle         = 30[deg]
X_Atn           = 4[dB]
X_Pulse         = 2.9[us]
Irr_Atn_Dec     = 22.569[dB]
Irr_Atn_Noise  = 22.569[dB]
Irr_Noise       = WALTZ
Irr_Pwidth      = 0.115[ms]
Decoupling      = TRUE
Initial_Wait    = 1[s]
Noe              = TRUE
Noe Time        = 1.5[s]

```

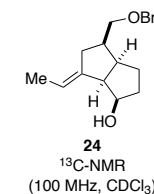

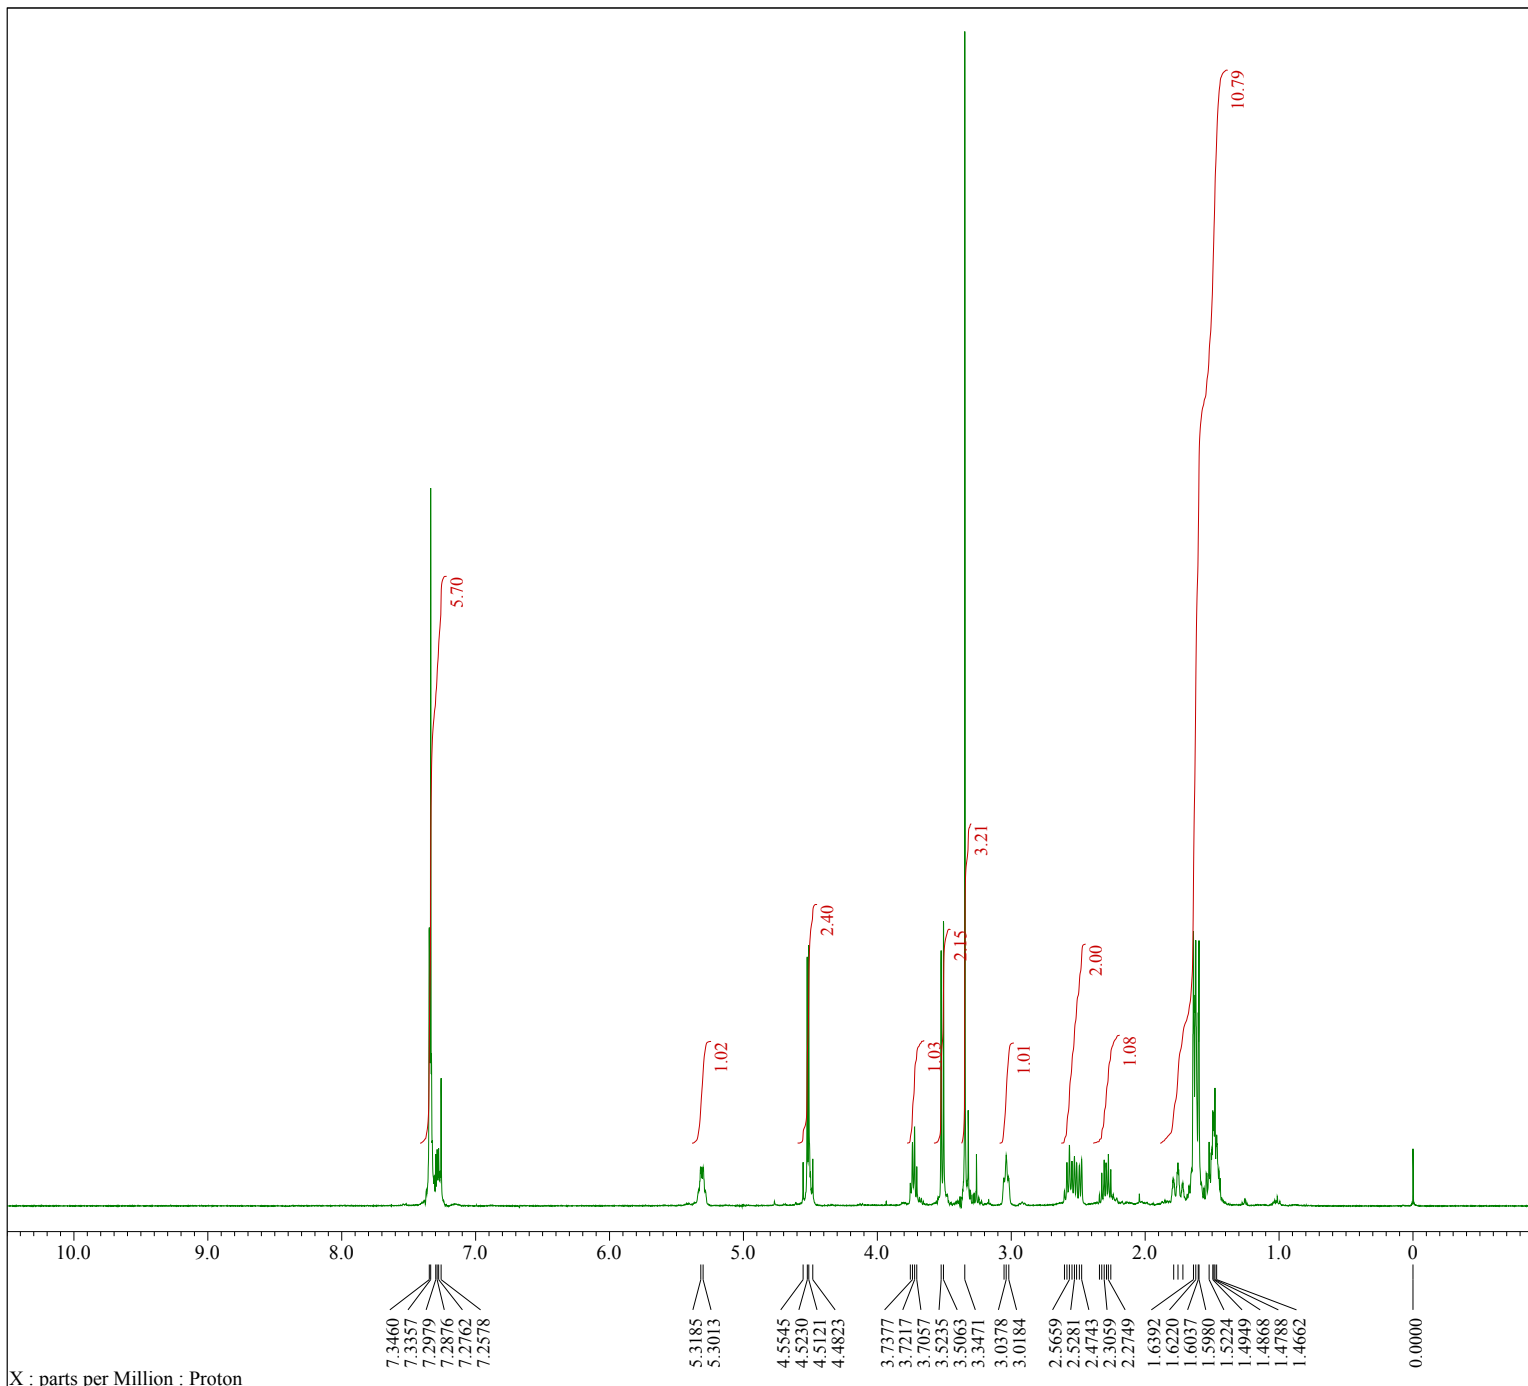

Filename = yk05351\_non-data-1-3.jd  
 Author = delta  
 Experiment = single\_pulse.jxp  
 Sample\_Id = yk05351  
 Solvent = CHLOROFORM-D  
 Creation Time = 5-AUG-2016 20:03:37  
 Revision Time = 20-FEB-2018 20:17:02  
 Current Time = 20-FEB-2018 20:17:35

Data Format = 1D COMPLEX  
 Dim\_Size = 13107  
 Dim\_Title = Proton  
 Dim\_Units = [ppm]  
 Dimensions = X  
 Site = JNM-ECS400  
 Spectrometer = DELTA2\_NMR

Field Strength = 9.389766[T] (400[MHz])  
 X\_Acq\_Duration = 2.18365952[s]  
 X\_Domain = 1H  
 X\_Freq = 399.78219838[MHz]  
 X\_Offset = 5[ppm]  
 X\_Points = 16384  
 X\_Prescans = 1  
 X\_Resolution = 0.45794685[Hz]  
 X\_Sweep = 7.5030012[kHz]  
 X\_Sweep\_Clippped = 6.00240096[kHz]  
 Irr\_Domain = Proton  
 Irr\_Freq = 399.78219838[MHz]  
 Irr\_Offset = 5[ppm]  
 Tri\_Domain = Proton  
 Tri\_Freq = 399.78219838[MHz]  
 Tri\_Offset = 5[ppm]  
 Clipped = FALSE  
 Scans = 1  
 Total\_Scans = 1

Relaxation\_Delay = 5[s]  
 Recvr\_Gain = 34  
 Temp\_Get = 23.8[dC]  
 X\_90\_Width = 10.025[us]  
 X\_Acq\_Time = 2.18365952[s]  
 X\_Angle = 90[deg]  
 X\_Atn = 1[dB]  
 X\_Pulse = 10.025[us]  
 Irr\_Mode = Off  
 Tri\_Mode = Off  
 DanTe\_Presat = FALSE  
 Initial\_Wait = 1[s]  
 Repetition Time = 7.18365952[s]

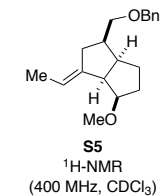

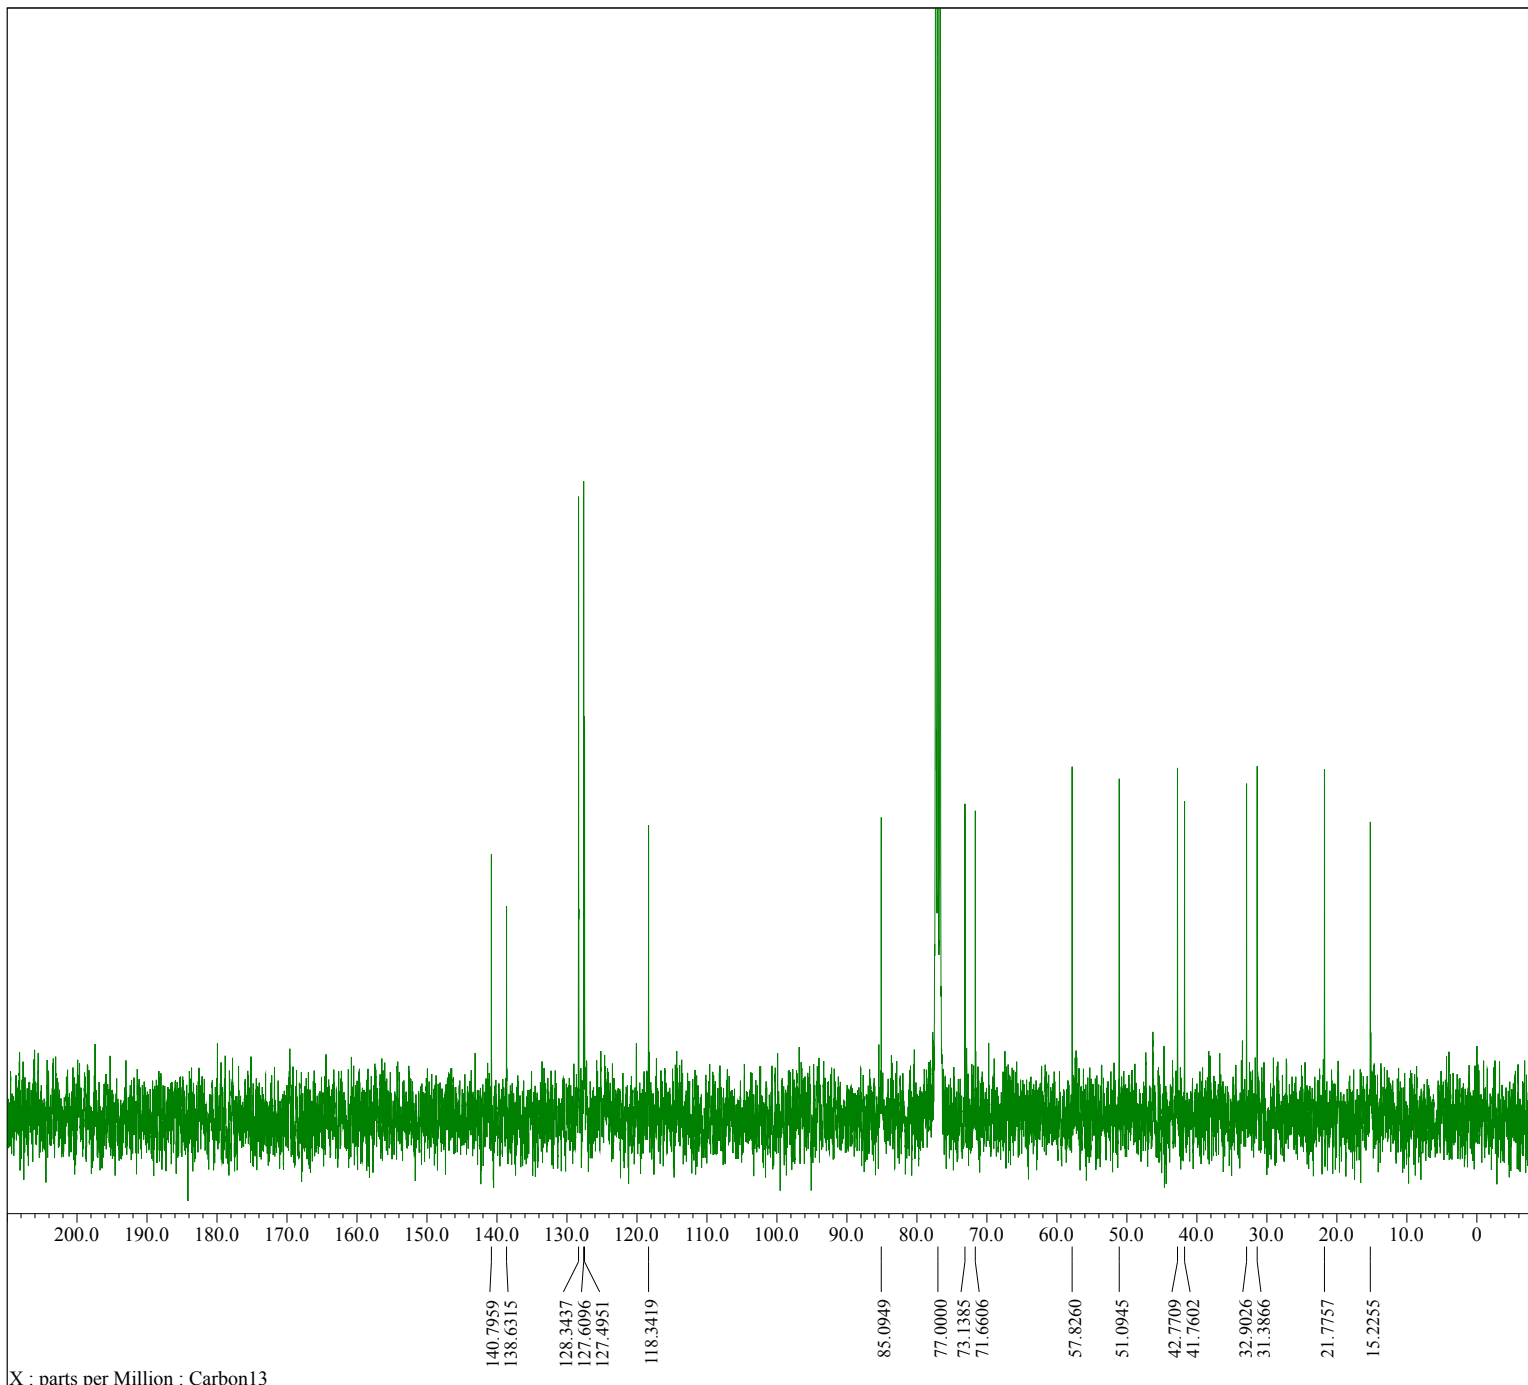

```

Filename      = yk05351_bcm-2-3.jdf
Author       = delta
Experiment   = single_pulse_dec.jxp
Sample_Id    = yk06076
Solvent      = CHLOROFORM-D
Creation Time = 20-JAN-2017 22:41:10
Revision Time = 20-FEB-2018 16:57:43
Current Time  = 20-FEB-2018 16:58:55

Data Format   = 1D COMPLEX
Dim_Size     = 26214
Dim_Title    = Carbon13
Dim_Units    = [ppm]
Dimensions   = X
Site         = JNM-ECS400
Spectrometer = DELTA2_NMR

Field Strength = 9.389766[T] (400[MHz])
X_Acq_Duration = 1.04333312[s]
X_Domain      = 13C
X_Freq        = 100.52530333[MHz]
X_Offset      = 100[ppm]
X_Points      = 32768
X_Prescans    = 4
X_Resolution  = 0.95846665[Hz]
X_Sweep       = 31.40703518[kHz]
X_Sweep_Clippped = 25.12562814[kHz]
Irr_Domain    = Proton
Irr_Freq      = 399.78219838[MHz]
Irr_Offset    = 5[ppm]
Clipped       = FALSE
Scans         = 2000
Total_Scans   = 2000

Relaxation_Delay = 1.5[s]
Recvr_Gain       = 50
Temp_Get         = 22.1[dC]
X_90_Width      = 8.7[us]
X_Acq_Time      = 1.04333312[s]
X_Angle         = 30[deg]
X_Atn           = 4[dB]
X_Pulse         = 2.9[us]
Irr_Atn_Dec     = 22.569[dB]
Irr_Atn_Noise  = 22.569[dB]
Irr_Noise      = WALTZ
Irr_Pwidth     = 0.115[ms]
Decoupling      = TRUE
Initial_Wait    = 1[s]
Noe              = TRUE
Noe Time        = 1.5[s]

```

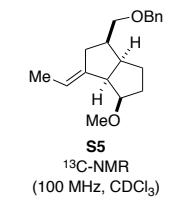

X : parts per Million : Carbon13

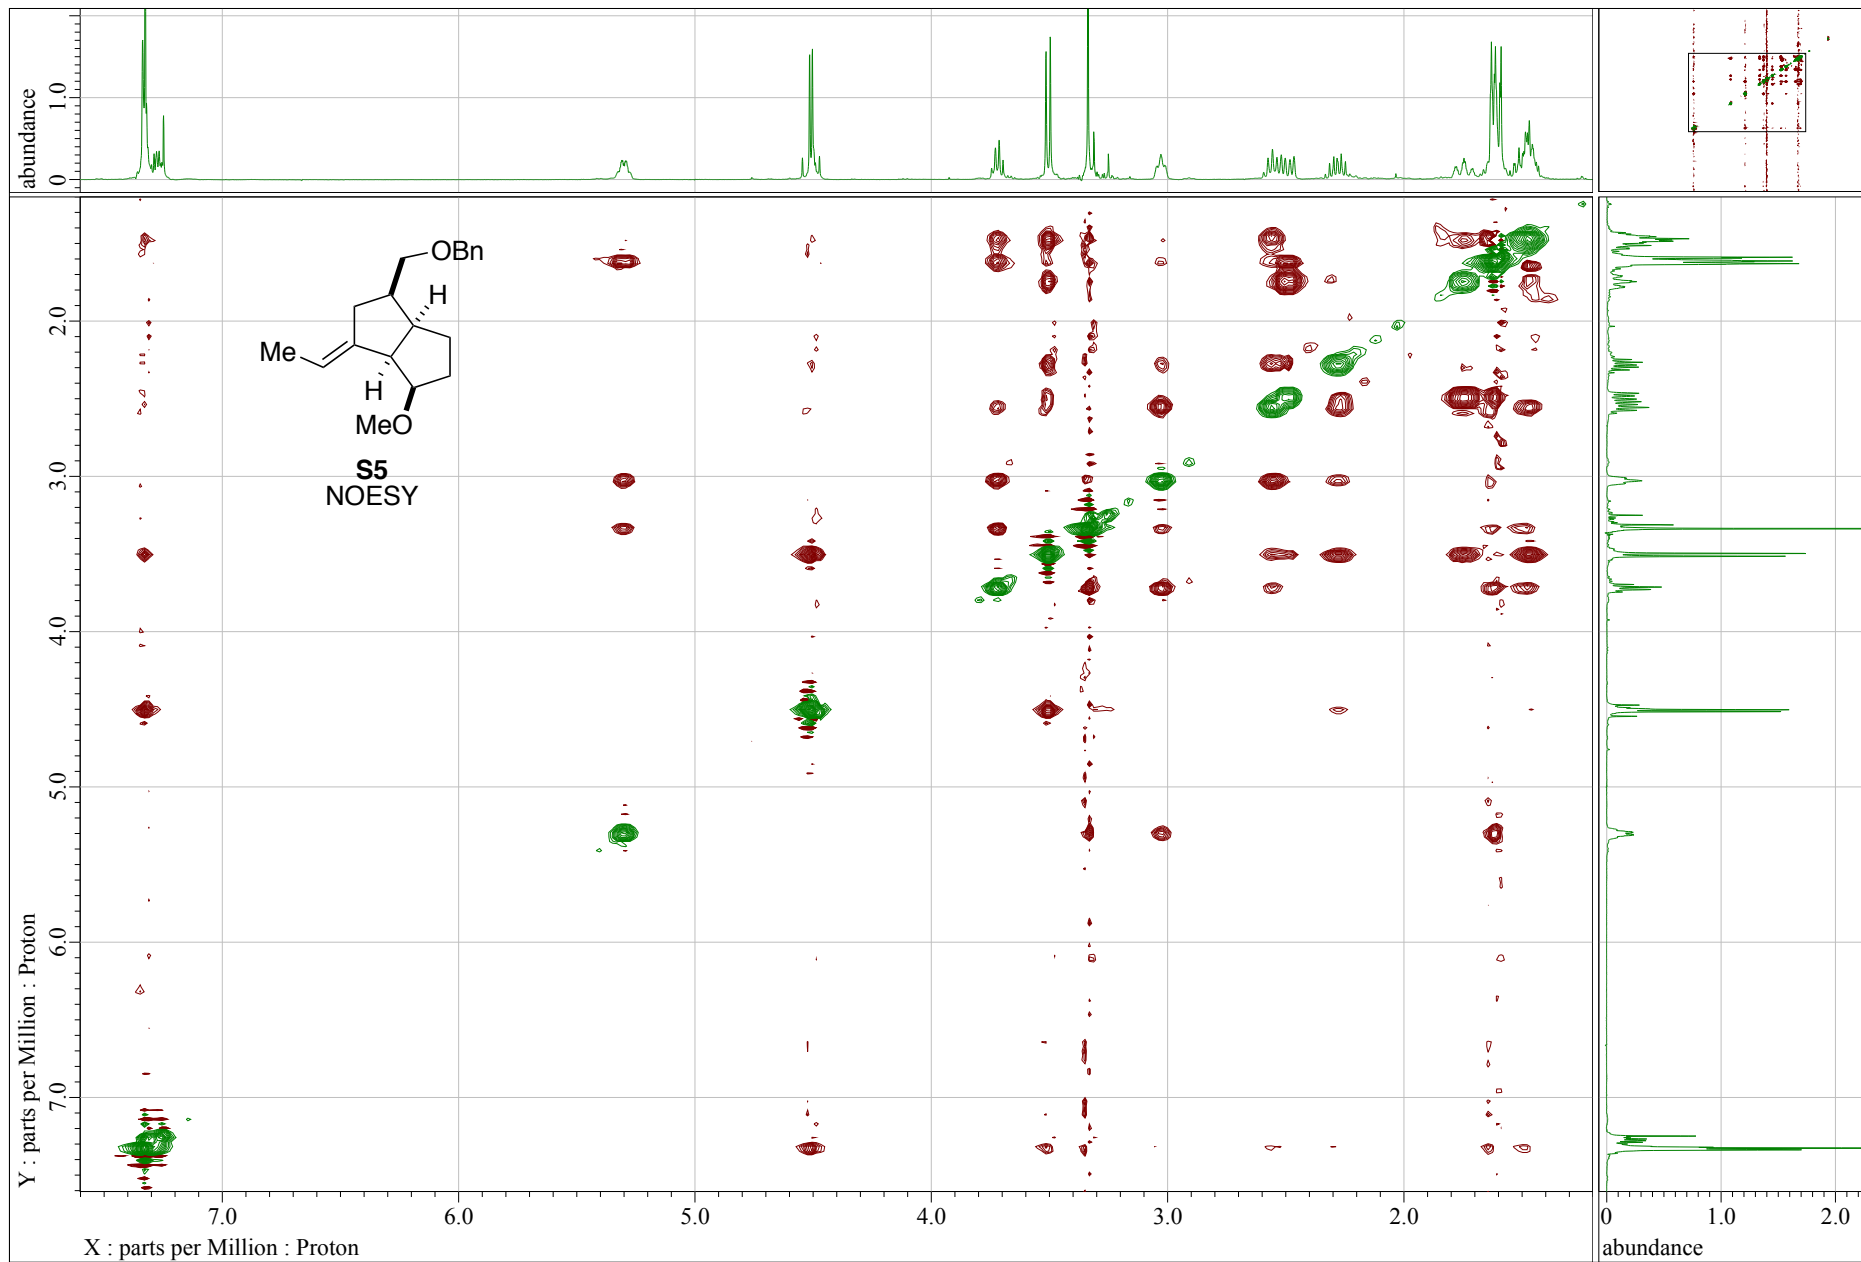



Filename = yk06065\_non-data-1-3.jd  
 Author = delta  
 Experiment = single\_pulse.jxp  
 Sample\_Id = yk06065  
 Solvent = CHLOROFORM-D  
 Creation Time = 2-NOV-2016 23:15:55  
 Revision Time = 20-FEB-2018 20:13:18  
 Current Time = 20-FEB-2018 20:13:59

Data Format = 1D COMPLEX  
 Dim\_Size = 13107  
 Dim Title = Proton  
 Dim Units = [ppm]  
 Dimensions = X  
 Site = JNM-ECS400  
 Spectrometer = DELTA2\_NMR

Field Strength = 9.389766[T] (400[MHz])  
 X\_Acq\_Duration = 2.18365952[s]  
 X\_Domain = 1H  
 X\_Freq = 399.78219838[MHz]  
 X\_Offset = 5[ppm]  
 X\_Points = 16384  
 X\_Prescans = 1  
 X\_Resolution = 0.45794685[Hz]  
 X\_Sweep = 7.5030012[kHz]  
 X\_Sweep\_Clippped = 6.00240096[kHz]  
 Irr\_Domain = Proton  
 Irr\_Freq = 399.78219838[MHz]  
 Irr\_Offset = 5[ppm]  
 Tri\_Domain = Proton  
 Tri\_Freq = 399.78219838[MHz]  
 Tri\_Offset = 5[ppm]  
 Clipped = FALSE  
 Scans = 8  
 Total\_Scans = 8

Relaxation\_Delay = 5[s]  
 Recvr\_Gain = 40  
 Temp\_Get = 23[dC]  
 X\_90\_Width = 10.025[us]  
 X\_Acq\_Time = 2.18365952[s]  
 X\_Angle = 45[deg]  
 X\_Atn = 1[dB]  
 X\_Pulse = 5.0125[us]  
 Irr\_Mode = Off  
 Tri\_Mode = Off  
 DanTe\_Presat = FALSE  
 Initial\_Wait = 1[s]  
 Repetition Time = 7.18365952[s]

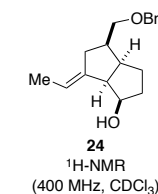



```

Filename      = yk06065_bcm-2-3.jdf
Author       = delta
Experiment   = single_pulse_dec.jxp
Sample_Id    = yk06065
Solvent      = CHLOROFORM-D
Creation_Time = 2-NOV-2016 23:35:43
Revision_Time = 20-FEB-2018 16:54:43
Current_Time = 20-FEB-2018 16:55:18

Data Format    = 1D COMPLEX
Dim_Size      = 26214
Dim_Title     = Carbon13
Dim_Units     = [ppm]
Dimensions    = X
Site          = JNM-ECS400
Spectrometer  = DELTA2_NMR

Field Strength = 9.389766[T] (400[MHz])
X_Acq_Duration = 1.04333312[s]
X_Domain      = 13C
X_Freq        = 100.52530333[MHz]
X_Offset      = 100[ppm]
X_Points      = 32768
X_Prescans    = 4
X_Resolution  = 0.95846665[Hz]
X_Sweep       = 31.40703518[kHz]
X_Sweep_Clippped = 25.12562814[kHz]
Irr_Domain    = Proton
Irr_Freq      = 399.78219838[MHz]
Irr_Offset    = 5[ppm]
Clipped       = FALSE
Scans         = 512
Total_Scans   = 512

Relaxation_Delay = 1.5[s]
Recvr_Gain       = 50
Temp_Get         = 23.4[dC]
X_90_Width      = 8.7[us]
X_Acq_Time      = 1.04333312[s]
X_Angle         = 30[deg]
X_Atn           = 4[dB]
X_Pulse         = 2.9[us]
Irr_Atn_Dec     = 22.569[dB]
Irr_Atn_Noise  = 22.569[dB]
Irr_Noise      = WALTZ
Irr_Pwidth     = 0.115[ms]
Decoupling      = TRUE
Initial_Wait    = 1[s]
Noe             = TRUE
Noe Time        = 1.5[s]

```

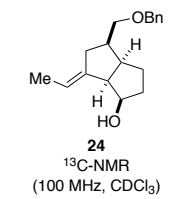

Filename = yk060767\_non-data-1-3.j  
 Author = delta  
 Experiment = single\_pulse.jxp  
 Sample\_Id = yk060767  
 Solvent = CHLOROFORM-D  
 Creation Time = 12-JAN-2017 22:10:44  
 Revision Time = 20-FEB-2018 20:20:44  
 Current Time = 20-FEB-2018 20:21:13

Data Format = 1D COMPLEX  
 Dim\_Size = 13107  
 Dim\_Title = Proton  
 Dim\_Units = [ppm]  
 Dimensions = X  
 Site = JNM-ECS400  
 Spectrometer = DELTA2\_NMR

Field Strength = 9.389766[T] (400[MHz])  
 X\_Acq\_Duration = 2.18365952[s]  
 X\_Domain = 1H  
 X\_Freq = 399.78219838[MHz]  
 X\_Offset = 5[ppm]  
 X\_Points = 16384  
 X\_Prescans = 1  
 X\_Resolution = 0.45794685[Hz]  
 X\_Sweep = 7.5030012[kHz]  
 X\_Sweep\_Clippped = 6.00240096[kHz]  
 Irr\_Domain = Proton  
 Irr\_Freq = 399.78219838[MHz]  
 Irr\_Offset = 5[ppm]  
 Tri\_Domain = Proton  
 Tri\_Freq = 399.78219838[MHz]  
 Tri\_Offset = 5[ppm]  
 Clipped = FALSE  
 Scans = 8  
 Total\_Scans = 8

Relaxation\_Delay = 5[s]  
 Recvr\_Gain = 40  
 Temp\_Get = 21.9[dC]  
 X\_90\_Width = 10.025[us]  
 X\_Acq\_Time = 2.18365952[s]  
 X\_Angle = 45[deg]  
 X\_Atn = 1[dB]  
 X\_Pulse = 5.0125[us]  
 Irr\_Mode = Off  
 Tri\_Mode = Off  
 DanTe\_Presat = FALSE  
 Initial\_Wait = 1[s]  
 Repetition Time = 7.18365952[s]

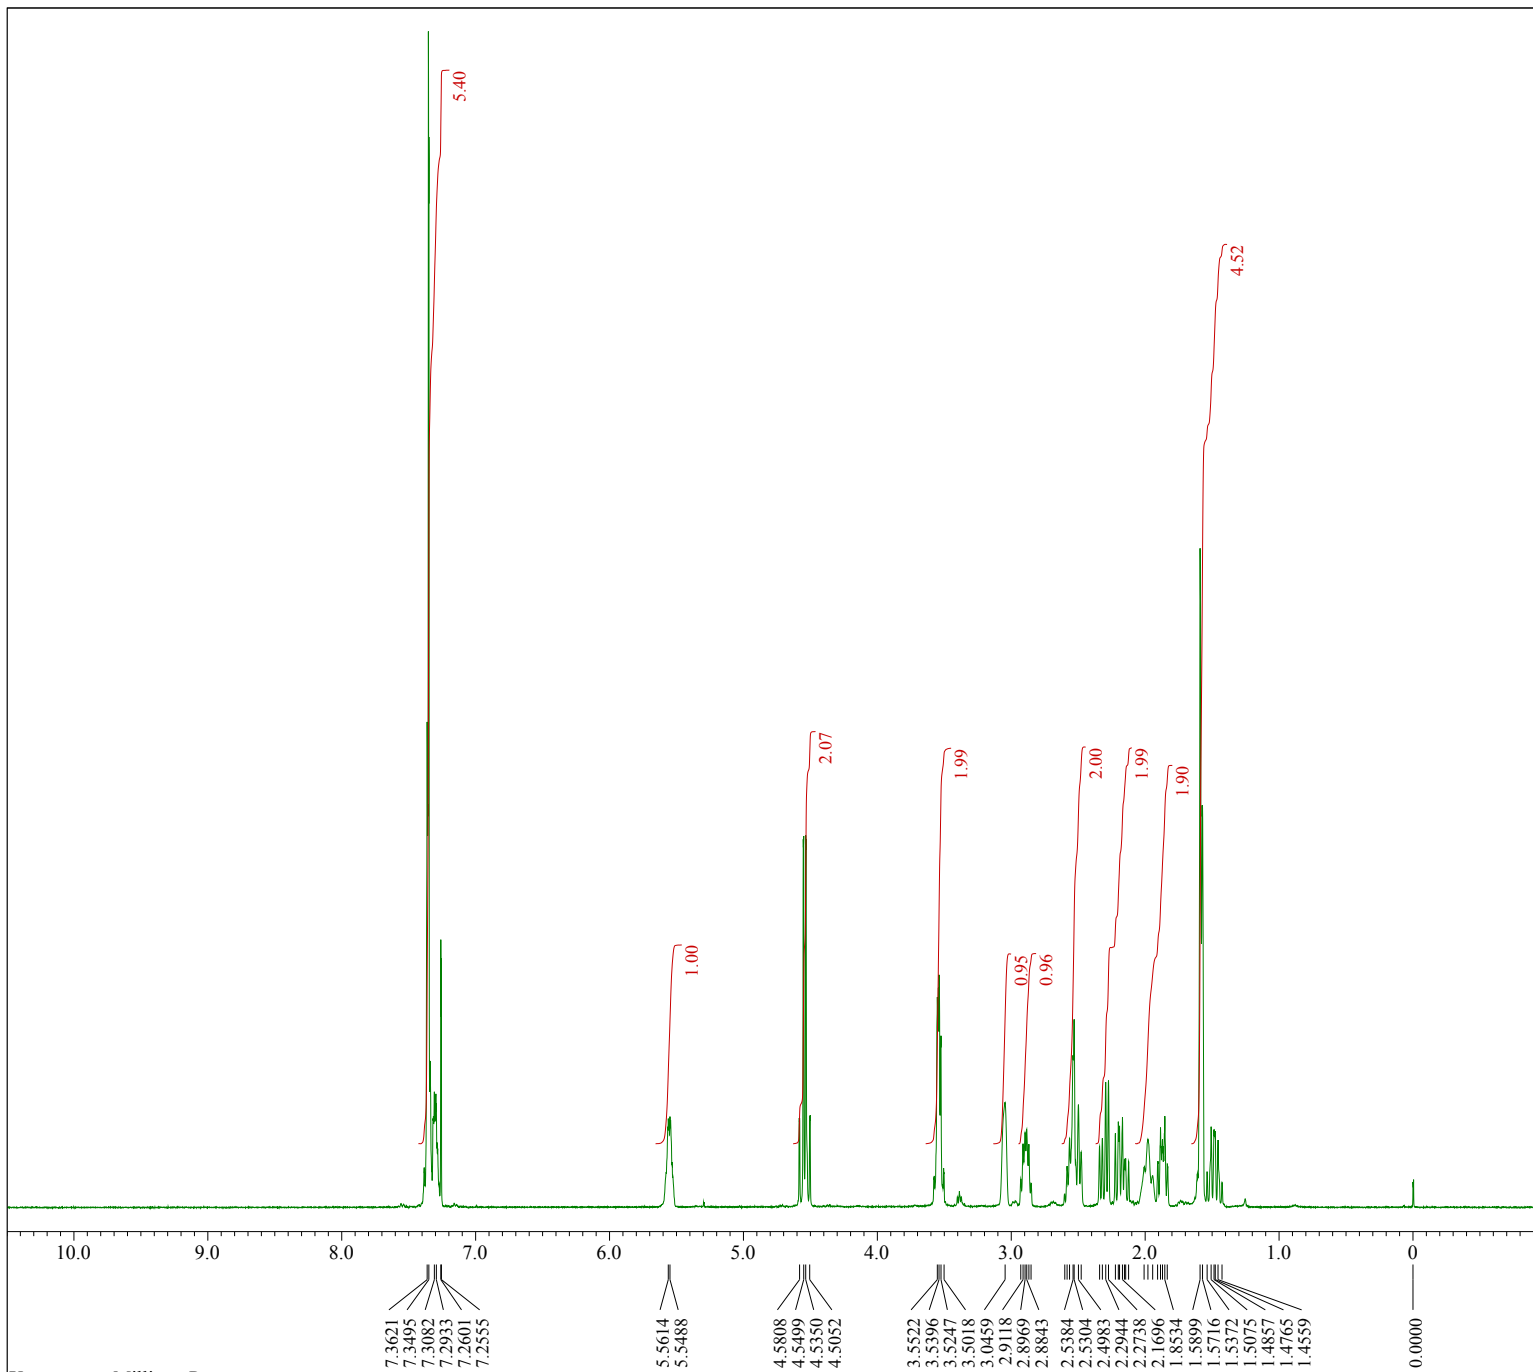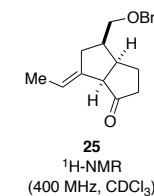



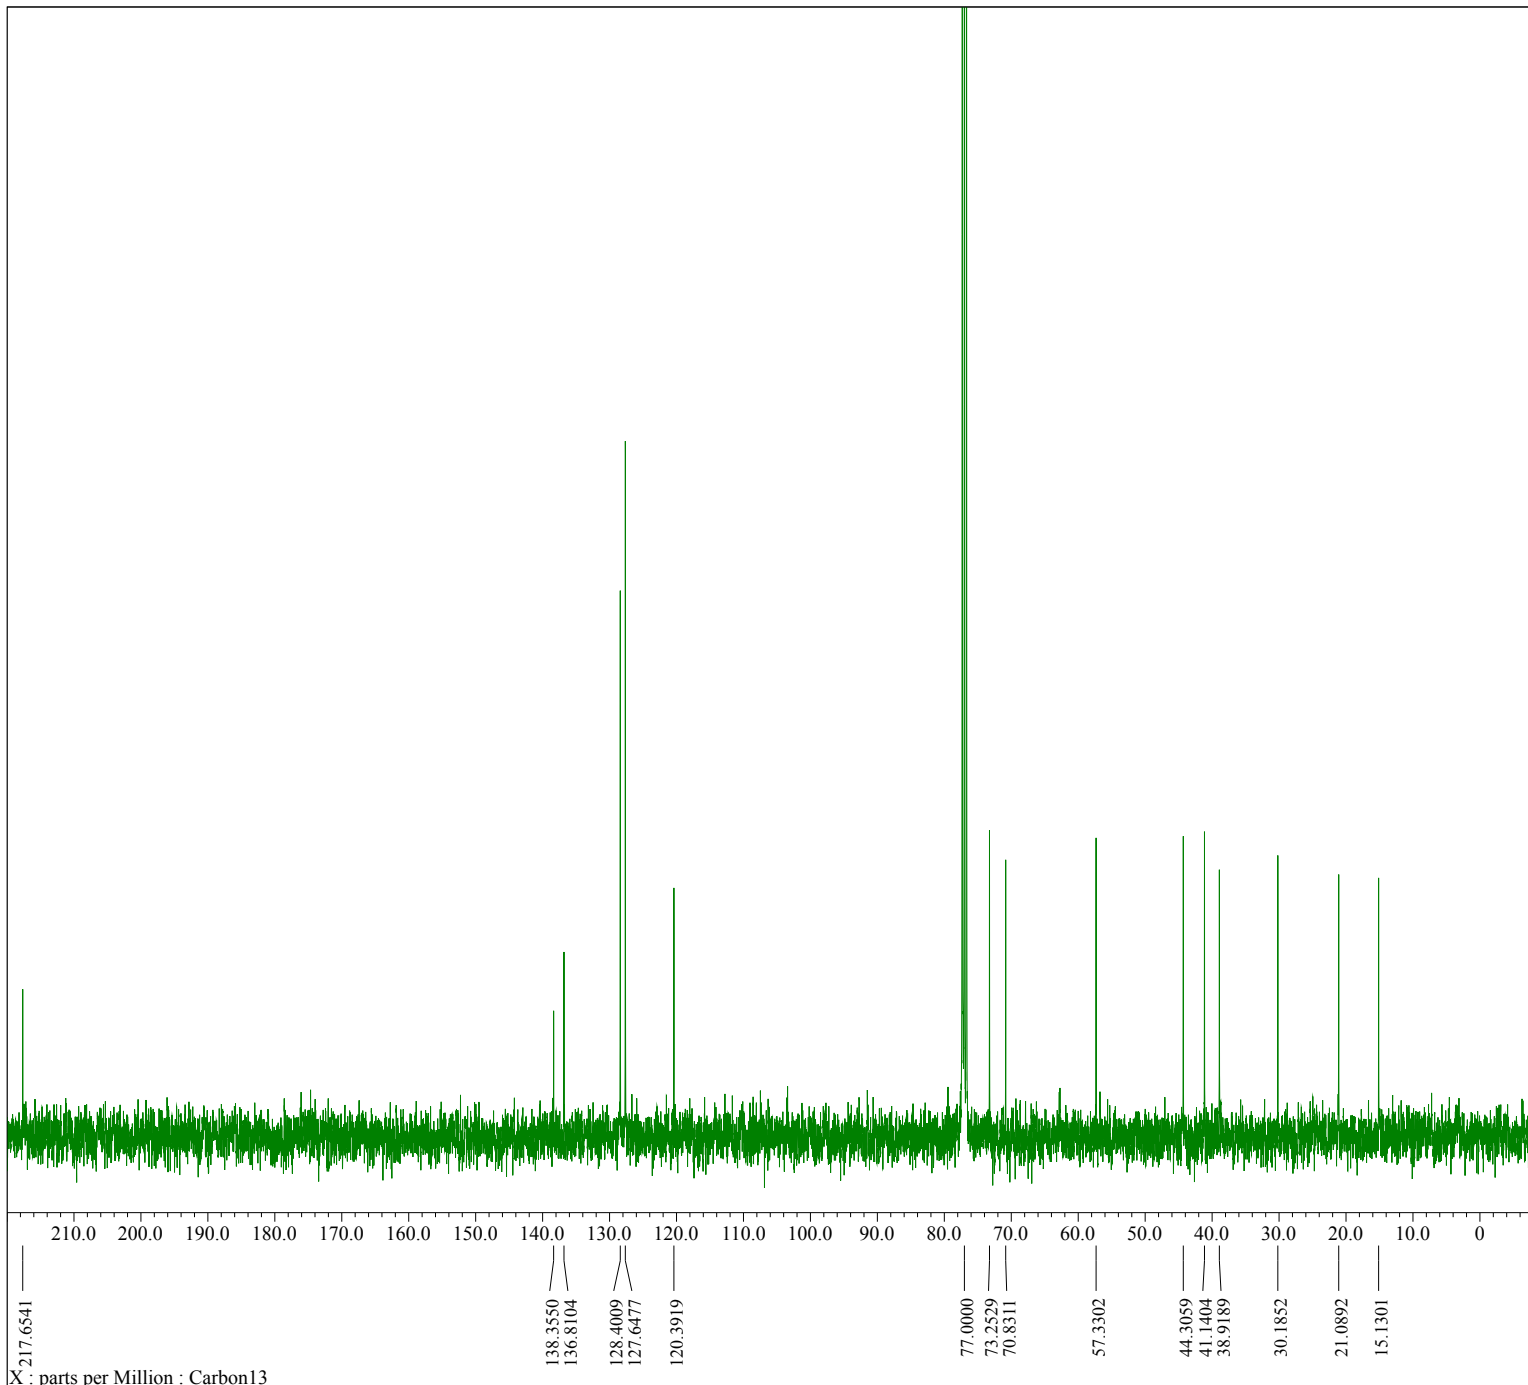

```

Filename      = yk060767_bcm-1-3.jdf
Author       = delta
Experiment    = single_pulse_dec.jxp
Sample_Id    = yk060767
Solvent      = CHLOROFORM-D
Creation_Time = 12-JAN-2017 22:13:17
Revision_Time = 20-FEB-2018 17:00:43
Current_Time  = 20-FEB-2018 17:01:25

Data Format   = 1D COMPLEX
Dim_Size     = 26214
Dim_Title    = Carbon13
Dim_Units    = [ppm]
Dimensions   = X
Site         = JNM-ECS400
Spectrometer = DELTA2_NMR

Field Strength = 9.389766[T] (400[MHz])
X_Acq_Duration = 1.04333312[s]
X_Domain       = 13C
X_Freq         = 100.52530333[MHz]
X_Offset       = 100[ppm]
X_Points       = 32768
X_Prescans     = 4
X_Resolution   = 0.95846665[Hz]
X_Sweep        = 31.40703518[kHz]
X_Sweep_Clippped = 25.12562814[kHz]
Irr_Domain     = Proton
Irr_Freq       = 399.78219838[MHz]
Irr_Offset     = 5[ppm]
Clipped        = FALSE
Scans          = 256
Total_Scans    = 256

Relaxation_Delay = 1.5[s]
Recvr_Gain       = 50
Temp_Get         = 22[dC]
X_90_Width      = 8.7[us]
X_Acq_Time      = 1.04333312[s]
X_Angle         = 30[deg]
X_Atn           = 4[dB]
X_Pulse         = 2.9[us]
Irr_Atn_Dec     = 22.569[dB]
Irr_Atn_No     = 22.569[dB]
Irr_Noise      = WALTZ
Irr_Pwidth     = 0.115[ms]
Decoupling      = TRUE
Initial_Wait    = 1[s]
Noe              = TRUE
Noe Time        = 1.5[s]

```

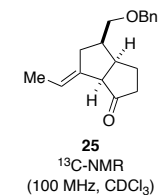

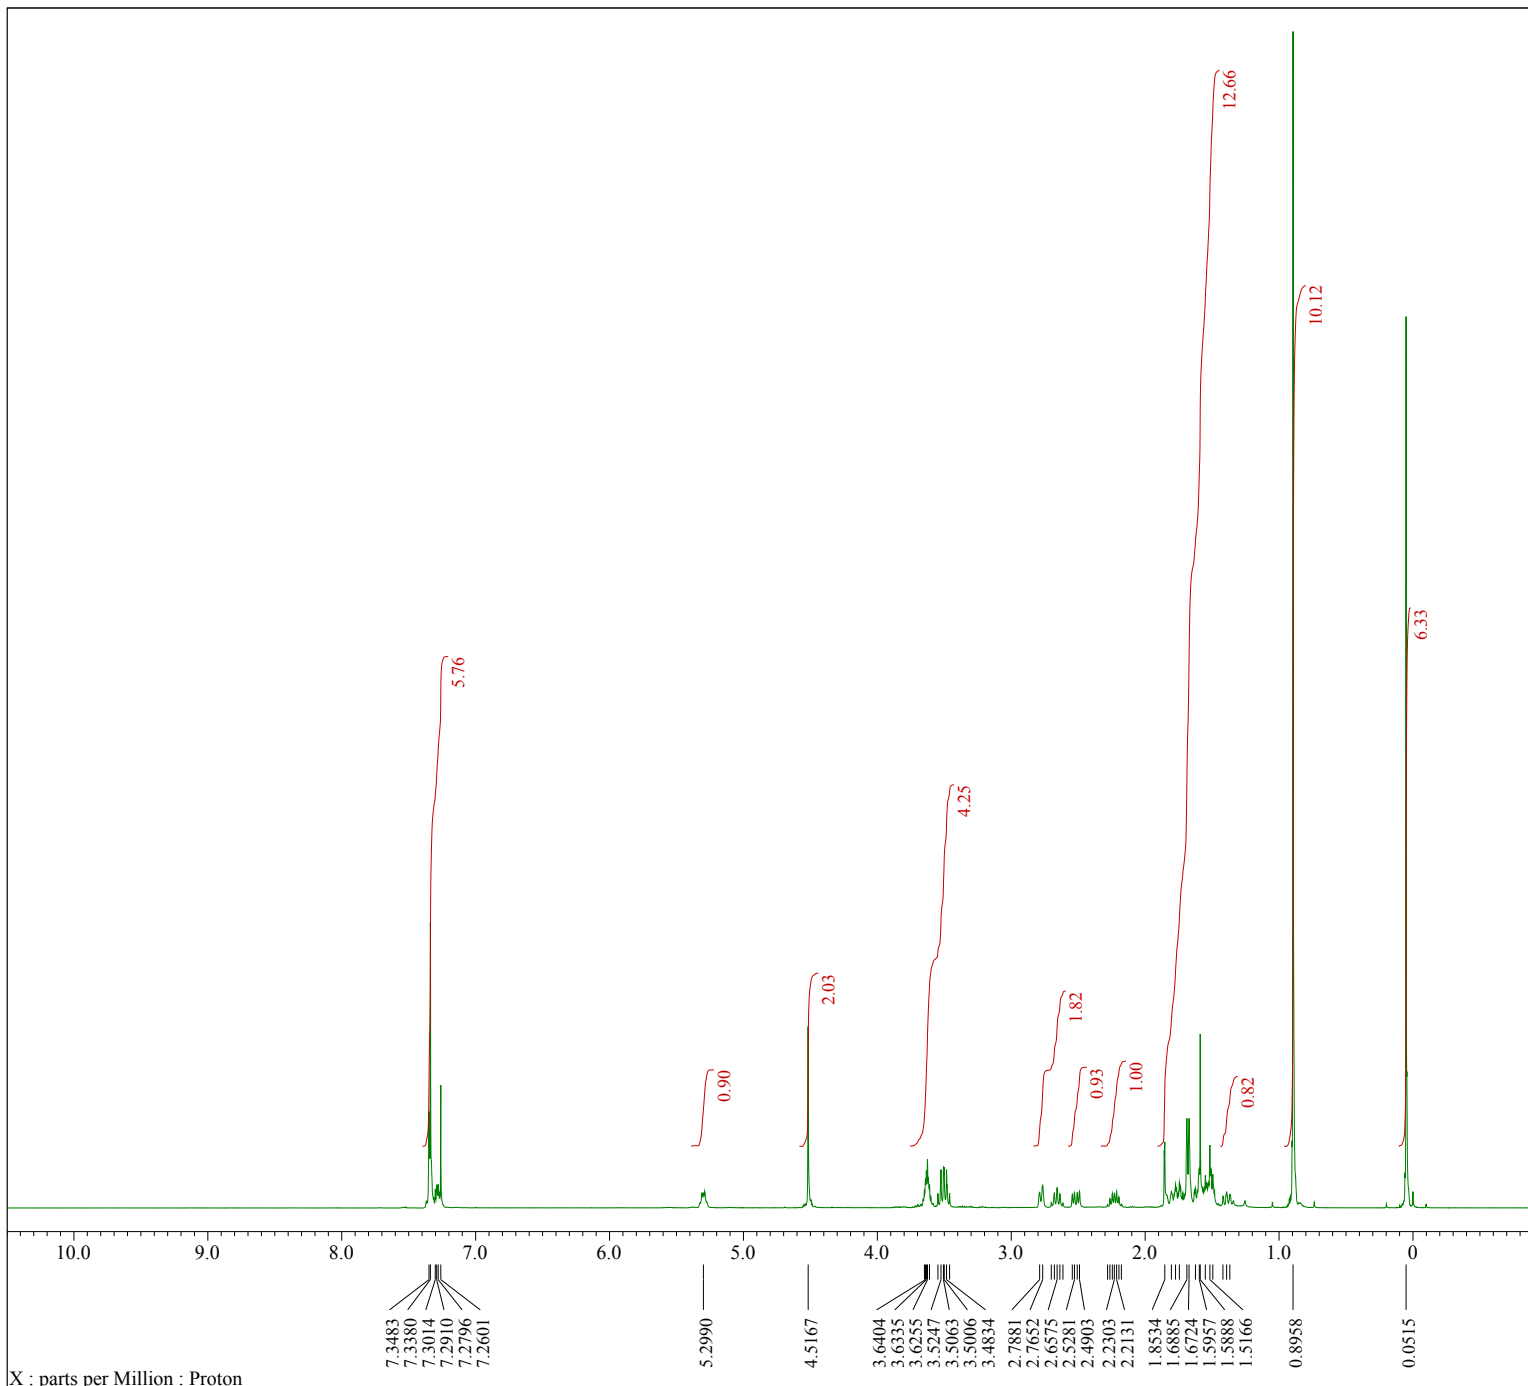

Filename = yk06068data\_non-data-1-  
 Author = delta  
 Experiment = single\_pulse.jxp  
 Sample\_Id = yk06068data  
 Solvent = CHLOROFORM-D  
 Creation Time = 11-JAN-2017 21:29:03  
 Revision Time = 20-FEB-2018 20:24:27  
 Current Time = 20-FEB-2018 20:24:58

Data Format = 1D COMPLEX  
 Dim\_Size = 13107  
 Dim\_Title = Proton  
 Dim\_Units = [ppm]  
 Dimensions = X  
 Site = JNM-ECS400  
 Spectrometer = DELTA2\_NMR

Field Strength = 9.389766[T] (400[MHz])  
 X\_Acq\_Duration = 2.18365952[s]  
 X\_Domain = 1H  
 X\_Freq = 399.78219838[MHz]  
 X\_Offset = 5[ppm]  
 X\_Points = 16384  
 X\_Prescans = 1  
 X\_Resolution = 0.45794685[Hz]  
 X\_Sweep = 7.5030012[kHz]  
 X\_Sweep\_Clippped = 6.00240096[kHz]  
 Irr\_Domain = Proton  
 Irr\_Freq = 399.78219838[MHz]  
 Irr\_Offset = 5[ppm]  
 Tri\_Domain = Proton  
 Tri\_Freq = 399.78219838[MHz]  
 Tri\_Offset = 5[ppm]  
 Clipped = FALSE  
 Scans = 16  
 Total\_Scans = 16

Relaxation\_Delay = 5[s]  
 Recvr\_Gain = 40  
 Temp\_Get = 22.1[dC]  
 X\_90\_Width = 10.025[us]  
 X\_Acq\_Time = 2.18365952[s]  
 X\_Angle = 45[deg]  
 X\_Atn = 1[dB]  
 X\_Pulse = 5.0125[us]  
 Irr\_Mode = Off  
 Tri\_Mode = Off  
 DanTe\_Presat = FALSE  
 Initial\_Wait = 1[s]  
 Repetition Time = 7.18365952[s]

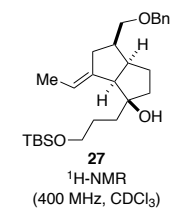

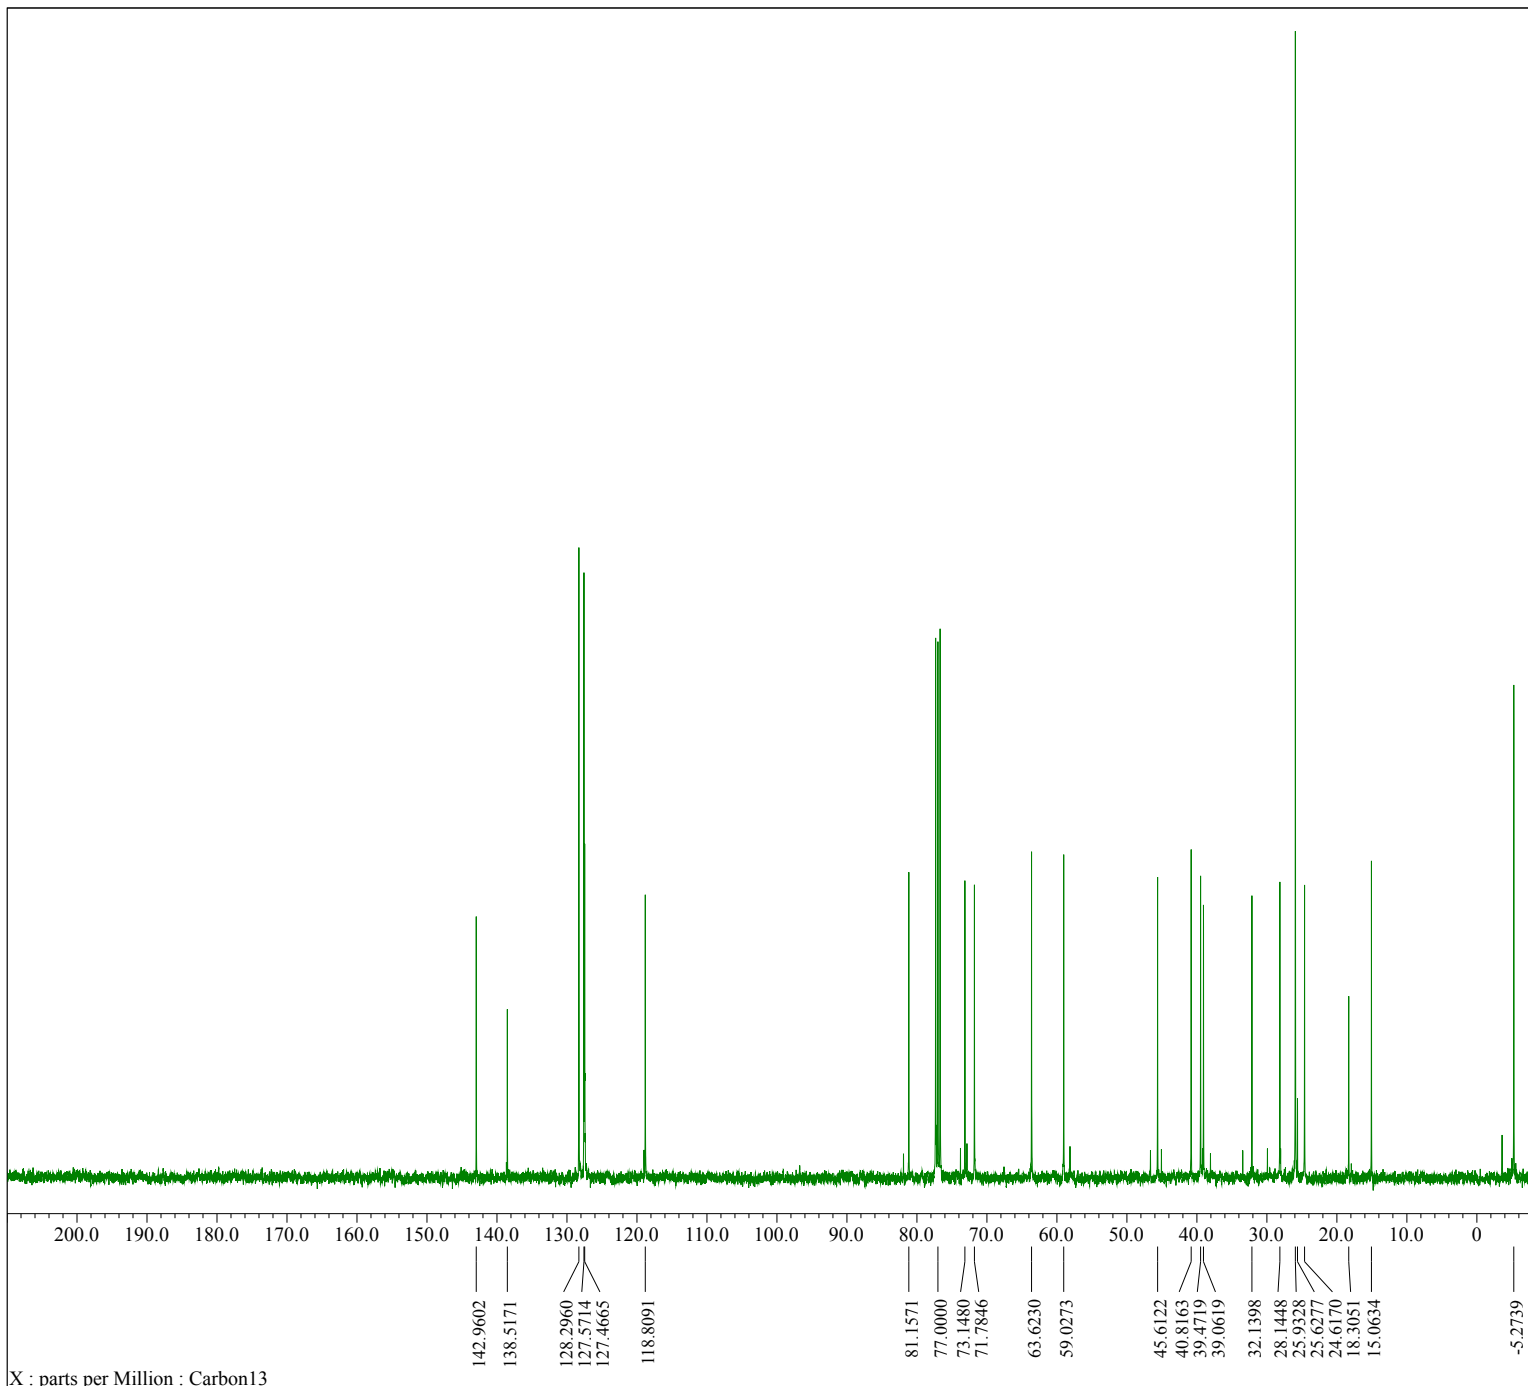

Filename = yk06068data\_bcm-1-3.jcf  
 Author = delta  
 Experiment = single\_pulse\_dec.jxp  
 Sample\_Id = yk06068data  
 Solvent = CHLOROFORM-D  
 Creation Time = 9-NOV-2016 11:17:20  
 Revision Time = 20-FEB-2018 17:03:17  
 Current Time = 20-FEB-2018 17:03:50

Data Format = 1D COMPLEX  
 Dim\_Size = 26214  
 Dim Title = Carbon13  
 Dim Units = [ppm]  
 Dimensions = X  
 Site = JNM-ECS400  
 Spectrometer = DELTA2\_NMR

Field Strength = 9.389766[T] (400[MHz])  
 X\_Acq\_Duration = 1.04333312[s]  
 X\_Domain = 13C  
 X\_Freq = 100.52530333[MHz]  
 X\_Offset = 100[ppm]  
 X\_Points = 32768  
 X\_Prescans = 4  
 X\_Resolution = 0.95846665[Hz]  
 X\_Sweep = 31.40703518[kHz]  
 X\_Sweep\_Clippped = 25.12562814[kHz]  
 Irr\_Domain = Proton  
 Irr\_Freq = 399.78219838[MHz]  
 Irr\_Offset = 5[ppm]  
 Clipped = FALSE  
 Scans = 128  
 Total\_Scans = 128

Relaxation\_Delay = 1.5[s]  
 Recvr\_Gain = 50  
 Temp\_Get = 23.4[dC]  
 X\_90\_Width = 8.7[us]  
 X\_Acq Time = 1.04333312[s]  
 X\_Angle = 30[deg]  
 X\_Atn = 4[dB]  
 X\_Pulse = 2.9[us]  
 Irr\_Atn\_Dec = 22.569[dB]  
 Irr\_Atn\_NoE = 22.569[dB]  
 Irr\_Noise = WALTZ  
 Irr\_Pwidth = 0.115[ms]  
 Decoupling = TRUE  
 Initial\_Wait = 1[s]  
 Noe = TRUE  
 Noe Time = 1.5[s]

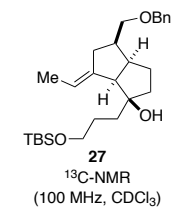

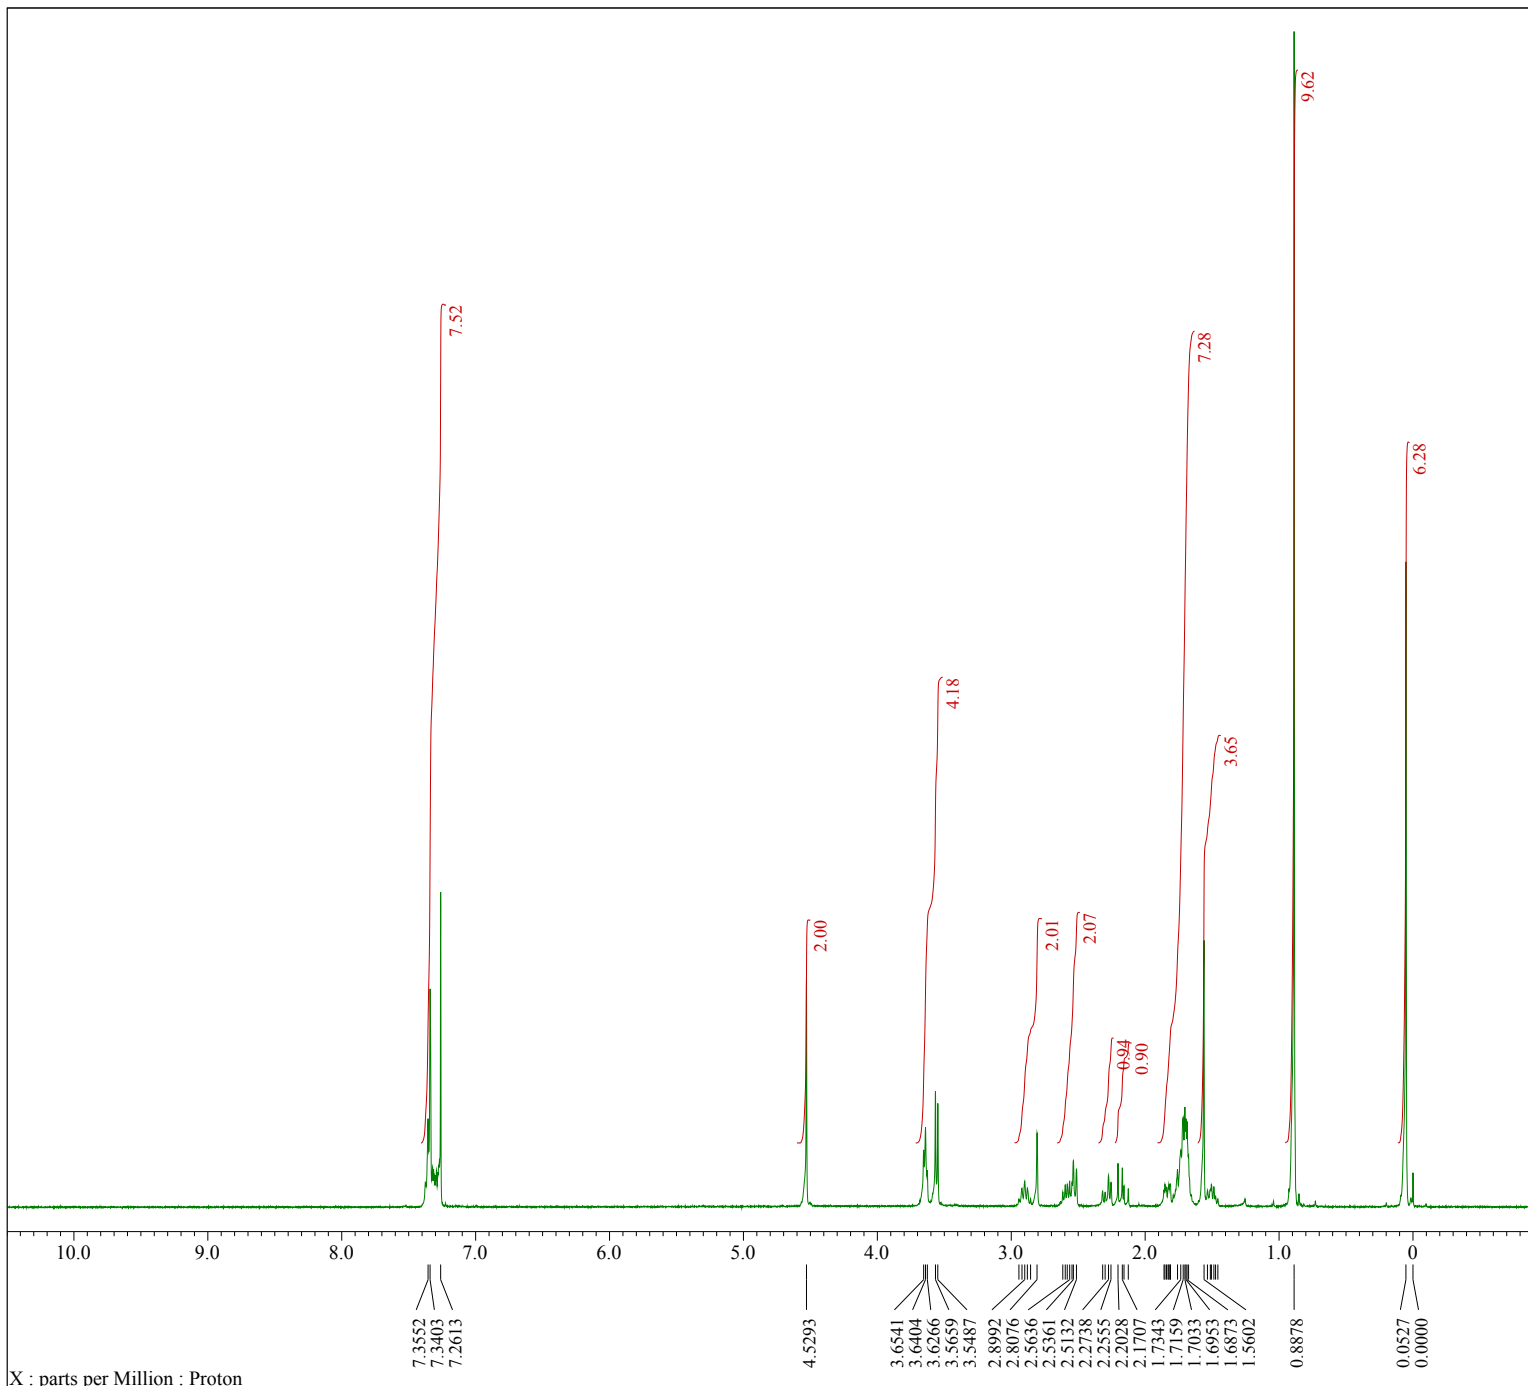

Filename = yk06069\_non-data-2-3.jd  
 Author = delta  
 Experiment = single\_pulse.jxp  
 Sample\_Id = yk06069  
 Solvent = CHLOROFORM-D  
 Creation Time = 12-JAN-2017 23:56:28  
 Revision Time = 20-FEB-2018 20:28:16  
 Current Time = 20-FEB-2018 20:29:19

Data Format = 1D COMPLEX  
 Dim\_Size = 13107  
 Dim\_Title = Proton  
 Dim\_Units = [ppm]  
 Dimensions = X  
 Site = JNM-ECS400  
 Spectrometer = DELTA2\_NMR

Field Strength = 9.389766[T] (400[MHz])  
 X\_Acq\_Duration = 2.18365952[s]  
 X\_Domain = 1H  
 X\_Freq = 399.78219838[MHz]  
 X\_Offset = 5[ppm]  
 X\_Points = 16384  
 X\_Prescans = 1  
 X\_Resolution = 0.45794685[Hz]  
 X\_Sweep = 7.5030012[kHz]  
 X\_Sweep\_Clipped = 6.00240096[kHz]  
 Irr\_Domain = Proton  
 Irr\_Freq = 399.78219838[MHz]  
 Irr\_Offset = 5[ppm]  
 Tri\_Domain = Proton  
 Tri\_Freq = 399.78219838[MHz]  
 Tri\_Offset = 5[ppm]  
 Clipped = FALSE  
 Scans = 8  
 Total\_Scans = 8

Relaxation\_Delay = 5[s]  
 Recvr\_Gain = 44  
 Temp\_Get = 21.9[dC]  
 X\_90\_Width = 10.025[us]  
 X\_Acq\_Time = 2.18365952[s]  
 X\_Angle = 45[deg]  
 X\_Atn = 1[dB]  
 X\_Pulse = 5.0125[us]  
 Irr\_Mode = Off  
 Tri\_Mode = Off  
 Dante\_Presat = FALSE  
 Initial\_Wait = 1[s]  
 Repetition Time = 7.18365952[s]

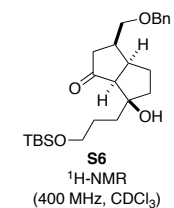

X : parts per Million : Proton

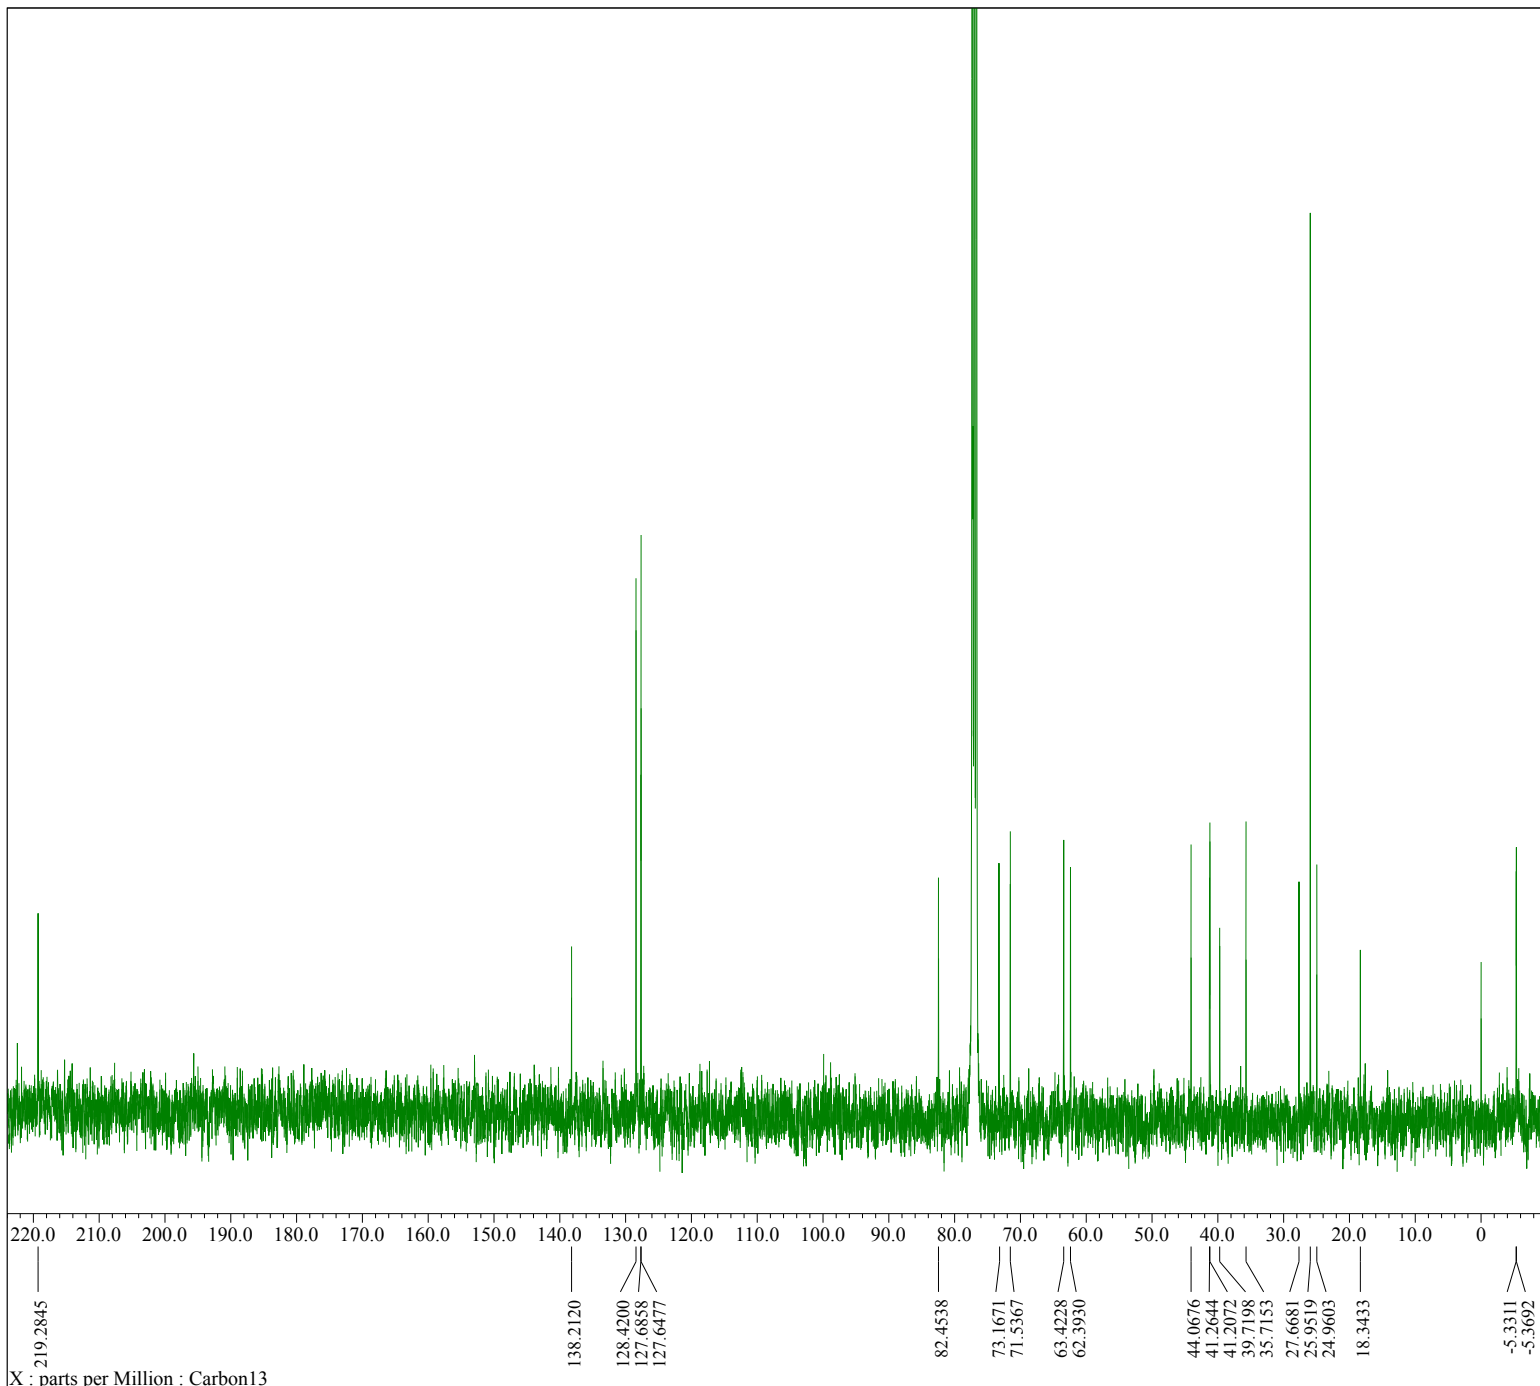

```

Filename      = yk06069_bcm-1-3.jdf
Author       = delta
Experiment   = single_pulse_dec.jxp
Sample_Id    = yk06069
Solvent      = CHLOROFORM-D
Creation Time = 14-JAN-2017 19:55:12
Revision Time = 20-FEB-2018 17:06:03
Current Time  = 20-FEB-2018 17:07:00

Data Format   = 1D COMPLEX
Dim_Size     = 26214
Dim_Title    = Carbon13
Dim_Units    = [ppm]
Dimensions   = X
Site         = JNM-ECS400
Spectrometer = DELTA2_NMR

Field Strength = 9.389766[T] (400[MHz])
X_Acq_Duration = 1.04333312[s]
X_Domain      = 13C
X_Freq        = 100.52530333[MHz]
X_Offset      = 100[ppm]
X_Points      = 32768
X_Prescans    = 4
X_Resolution  = 0.95846665[Hz]
X_Sweep       = 31.40703518[kHz]
X_Sweep_Clip  = 25.12562814[kHz]
Irr_Domain    = Proton
Irr_Freq      = 399.78219838[MHz]
Irr_Offset    = 5[ppm]
Clipped       = FALSE
Scans         = 6000
Total_Scans   = 6000

Relaxation_Delay = 1.5[s]
Recvr_Gain       = 50
Temp_Get         = 21.4[dC]
X_90_Width      = 8.7[us]
X_Acq_Time      = 1.04333312[s]
X_Angle         = 30[deg]
X_Atn           = 4[dB]
X_Pulse         = 2.9[us]
Irr_Atn_Dec     = 22.569[dB]
Irr_Atn_No     = 22.569[dB]
Irr_Noise      = WALTZ
Irr_Pwidth     = 0.115[ms]
Decoupling     = TRUE
Initial_Wait    = 1[s]
Noe             = TRUE
Noe Time       = 1.5[s]
  
```

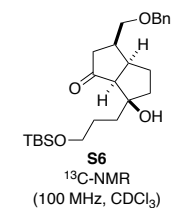

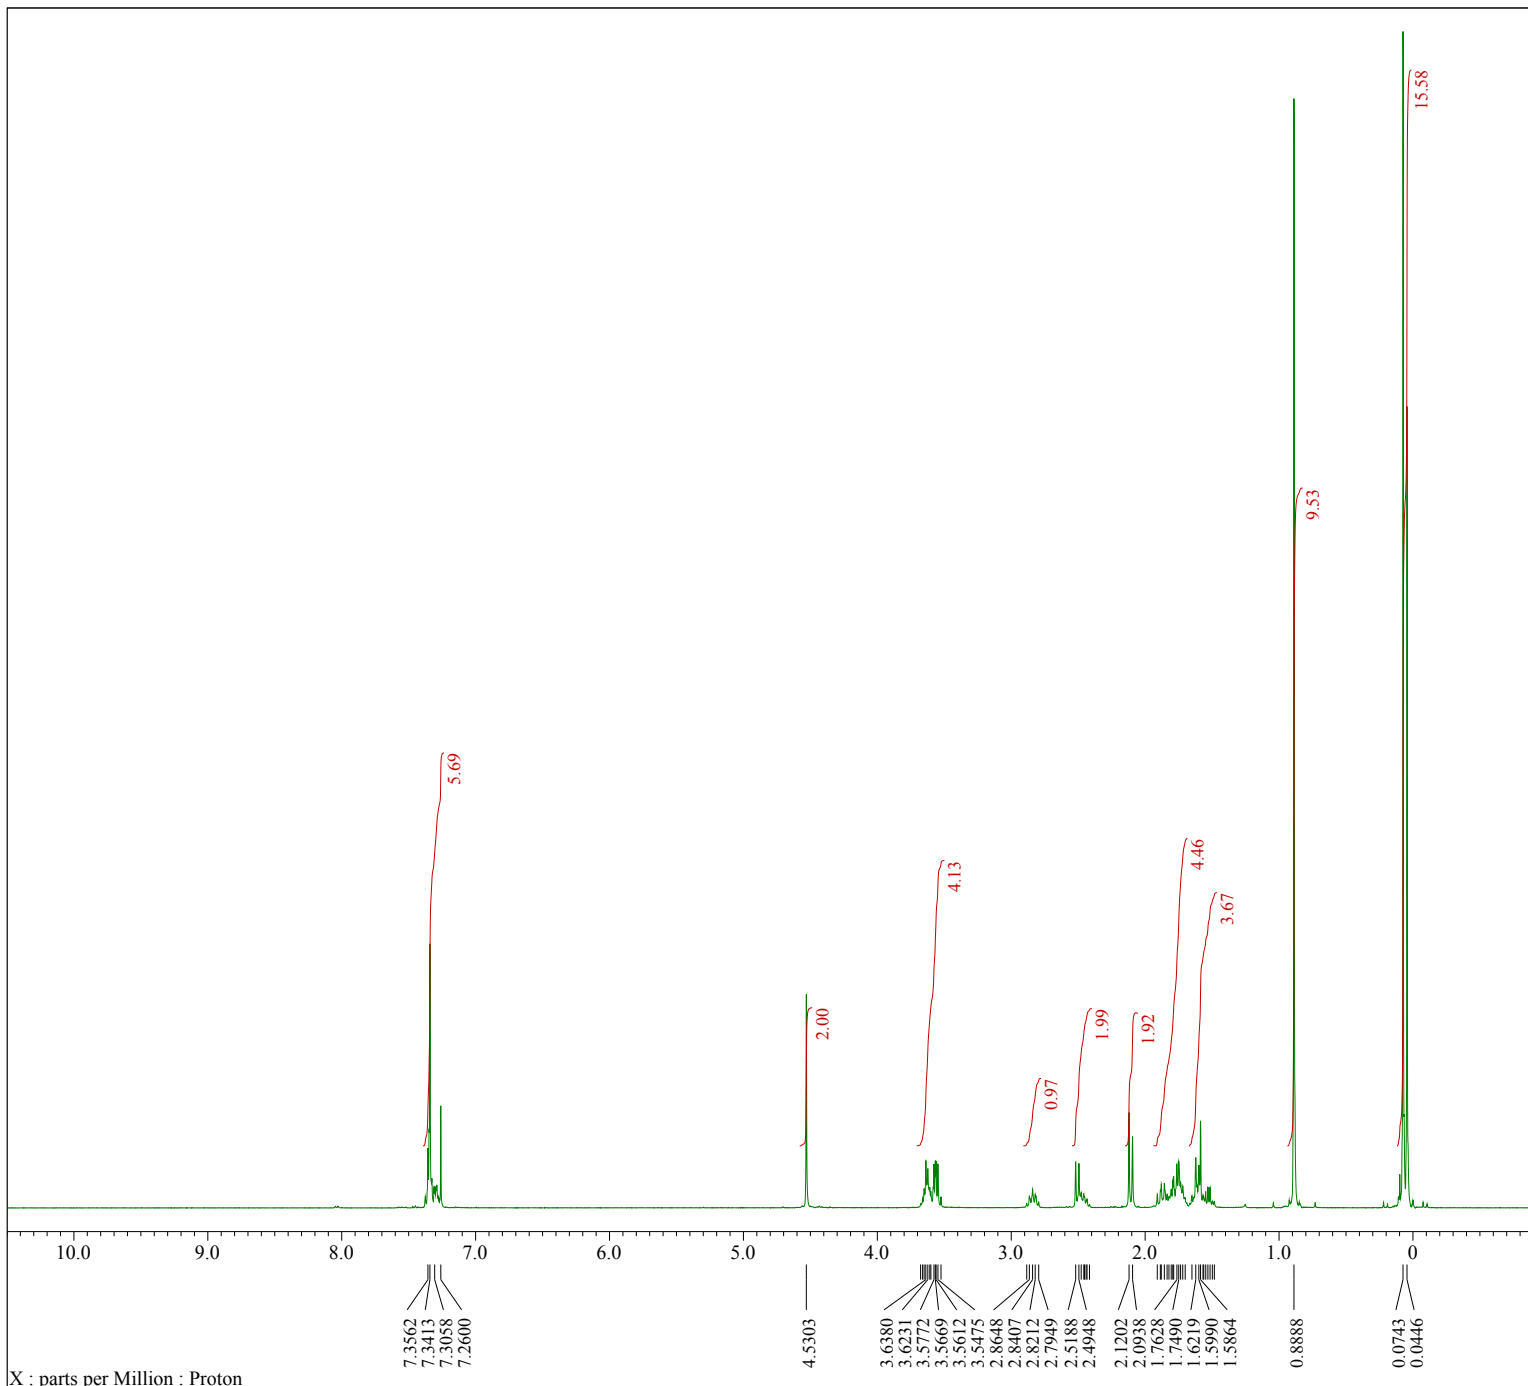

Filename = yk06070\_non-data-1-3.jd  
 Author = delta  
 Experiment = single\_pulse.jxp  
 Sample\_Id = yk06070  
 Solvent = CHLOROFORM-D  
 Creation Time = 16-JAN-2017 22:56:03  
 Revision Time = 20-FEB-2018 20:32:09  
 Current Time = 20-FEB-2018 20:32:36

Data Format = 1D COMPLEX  
 Dim\_Size = 13107  
 Dim\_Title = Proton  
 Dim\_Units = [ppm]  
 Dimensions = X  
 Site = JNM-ECS400  
 Spectrometer = DELTA2\_NMR

Field Strength = 9.389766[T] (400[MHz])  
 X\_Acq\_Duration = 2.18365952[s]  
 X\_Domain = 1H  
 X\_Freq = 399.78219838[MHz]  
 X\_Offset = 5[ppm]  
 X\_Points = 16384  
 X\_Prescans = 1  
 X\_Resolution = 0.45794685[Hz]  
 X\_Sweep = 7.5030012[kHz]  
 X\_Sweep\_Clippped = 6.00240096[kHz]  
 Irr\_Domain = Proton  
 Irr\_Freq = 399.78219838[MHz]  
 Irr\_Offset = 5[ppm]  
 Tri\_Domain = Proton  
 Tri\_Freq = 399.78219838[MHz]  
 Tri\_Offset = 5[ppm]  
 Clipped = FALSE  
 Scans = 8  
 Total\_Scans = 8

Relaxation\_Delay = 5[s]  
 Recvr\_Gain = 38  
 Temp\_Get = 21.4[dC]  
 X\_90\_Width = 10.025[us]  
 X\_Acq\_Time = 2.18365952[s]  
 X\_Angle = 45[deg]  
 X\_Atn = 1[dB]  
 X\_Pulse = 5.0125[us]  
 Irr\_Mode = Off  
 Tri\_Mode = Off  
 DanTe\_Presat = FALSE  
 Initial\_Wait = 1[s]  
 Repetition Time = 7.18365952[s]

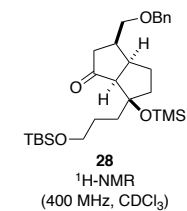

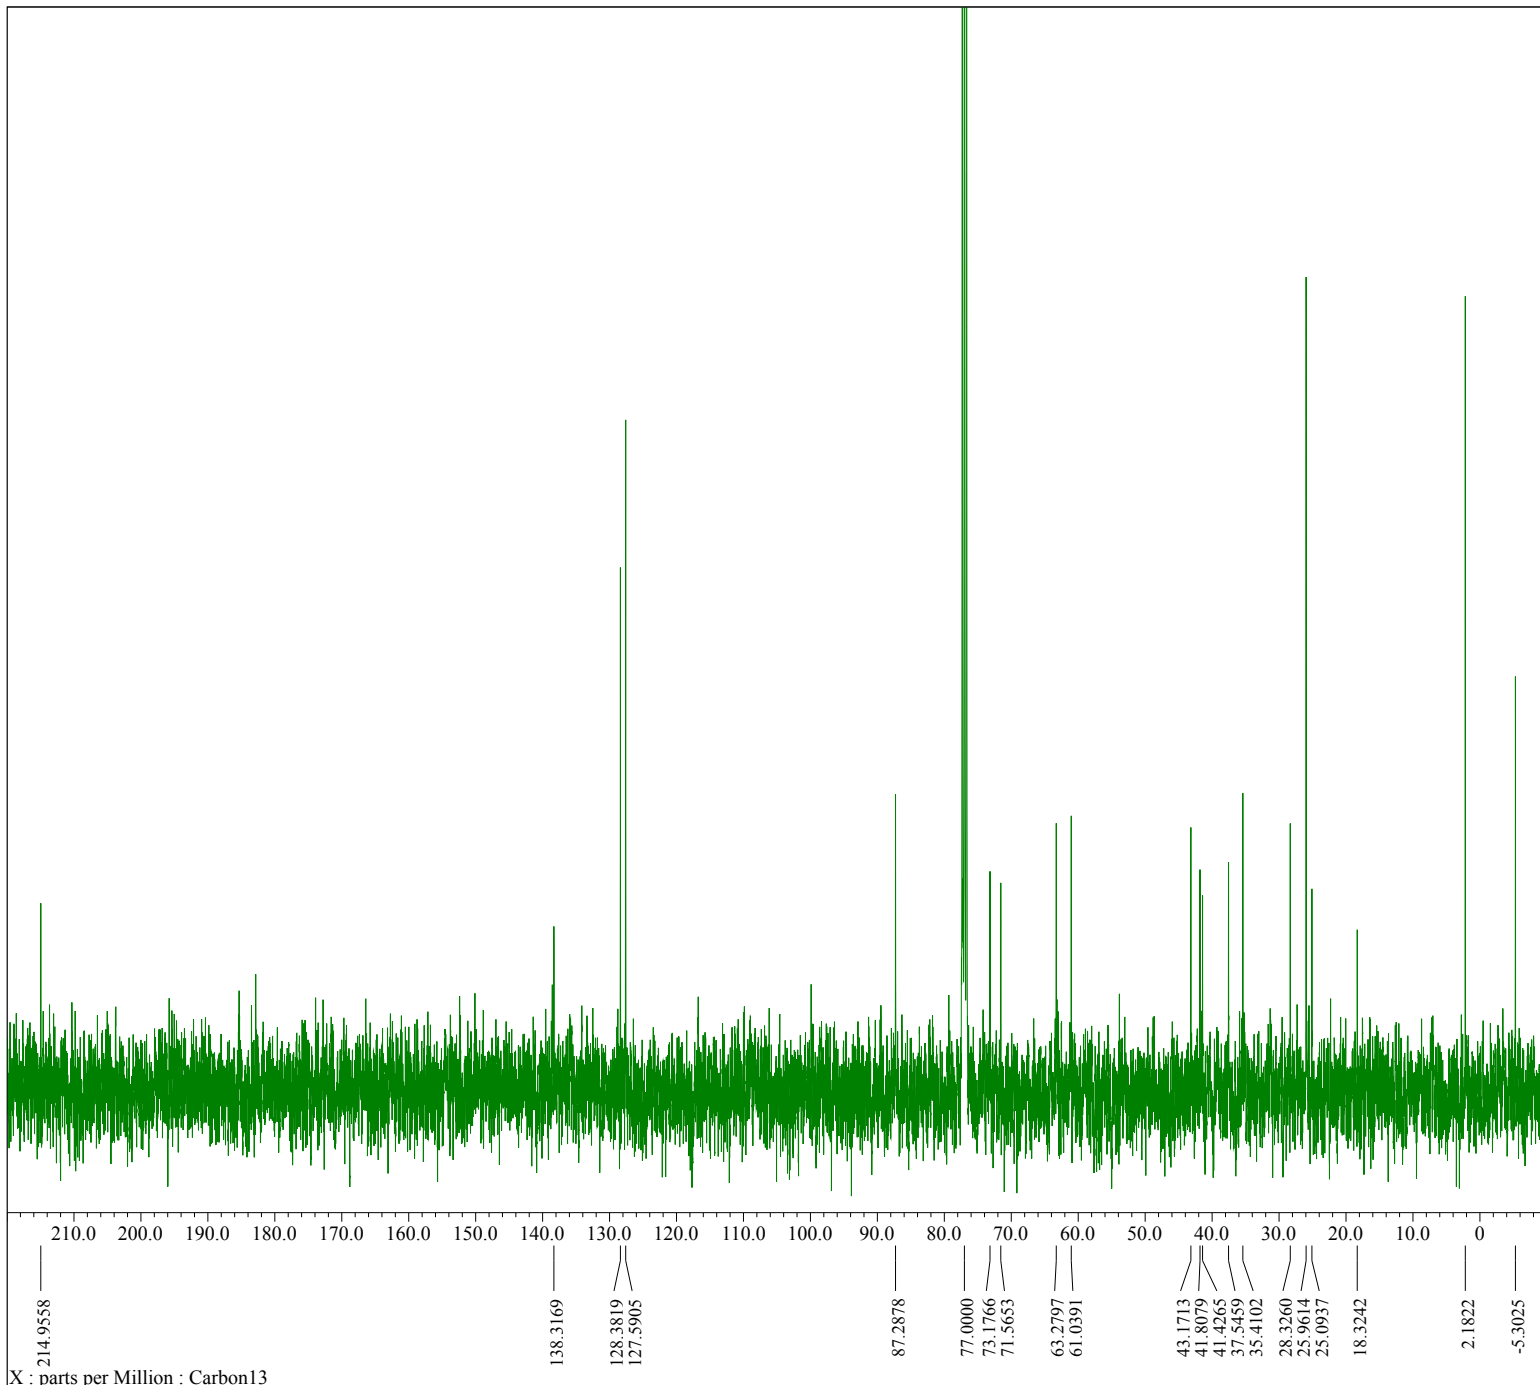

```

Filename      = yk06070_bcm-1-3.jdf
Author       = delta
Experiment   = single_pulse_dec.jxp
Sample_Id    = yk06070
Solvent      = CHLOROFORM-D
Creation Time = 16-JAN-2017 23:04:36
Revision Time = 20-FEB-2018 17:09:10
Current Time  = 20-FEB-2018 17:09:51

Data Format   = 1D COMPLEX
Dim_Size     = 26214
Dim_Title    = Carbon13
Dim_Units    = [ppm]
Dimensions   = X
Site         = JNM-ECS400
Spectrometer = DELTA2_NMR

Field Strength = 9.389766[T] (400[MHz])
X_Acq_Duration = 1.04333312[s]
X_Domain      = 13C
X_Freq       = 100.52530333[MHz]
X_Offset     = 100[ppm]
X_Points     = 32768
X_Prescans   = 4
X_Resolution = 0.95846665[Hz]
X_Sweep      = 31.40703518[kHz]
X_Sweep_Clip = 25.12562814[kHz]
Irr_Domain   = Proton
Irr_Freq     = 399.78219838[MHz]
Irr_Offset   = 5[ppm]
Clipped      = FALSE
Scans        = 256
Total_Scans  = 256

Relaxation_Delay = 1.5[s]
Recvr_Gain       = 50
Temp_Get         = 21.5[dC]
X_90_Width      = 8.7[us]
X_Acq_Time      = 1.04333312[s]
X_Angle         = 30[deg]
X_Atn           = 4[dB]
X_Pulse         = 2.9[us]
Irr_Atn_Dec     = 22.569[dB]
Irr_Atn_Noise  = 22.569[dB]
Irr_Noise      = WALTZ
Irr_Pwidth     = 0.115[ms]
Decoupling     = TRUE
Initial_Wait   = 1[s]
Noe             = TRUE
Noe Time       = 1.5[s]

```

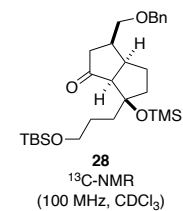

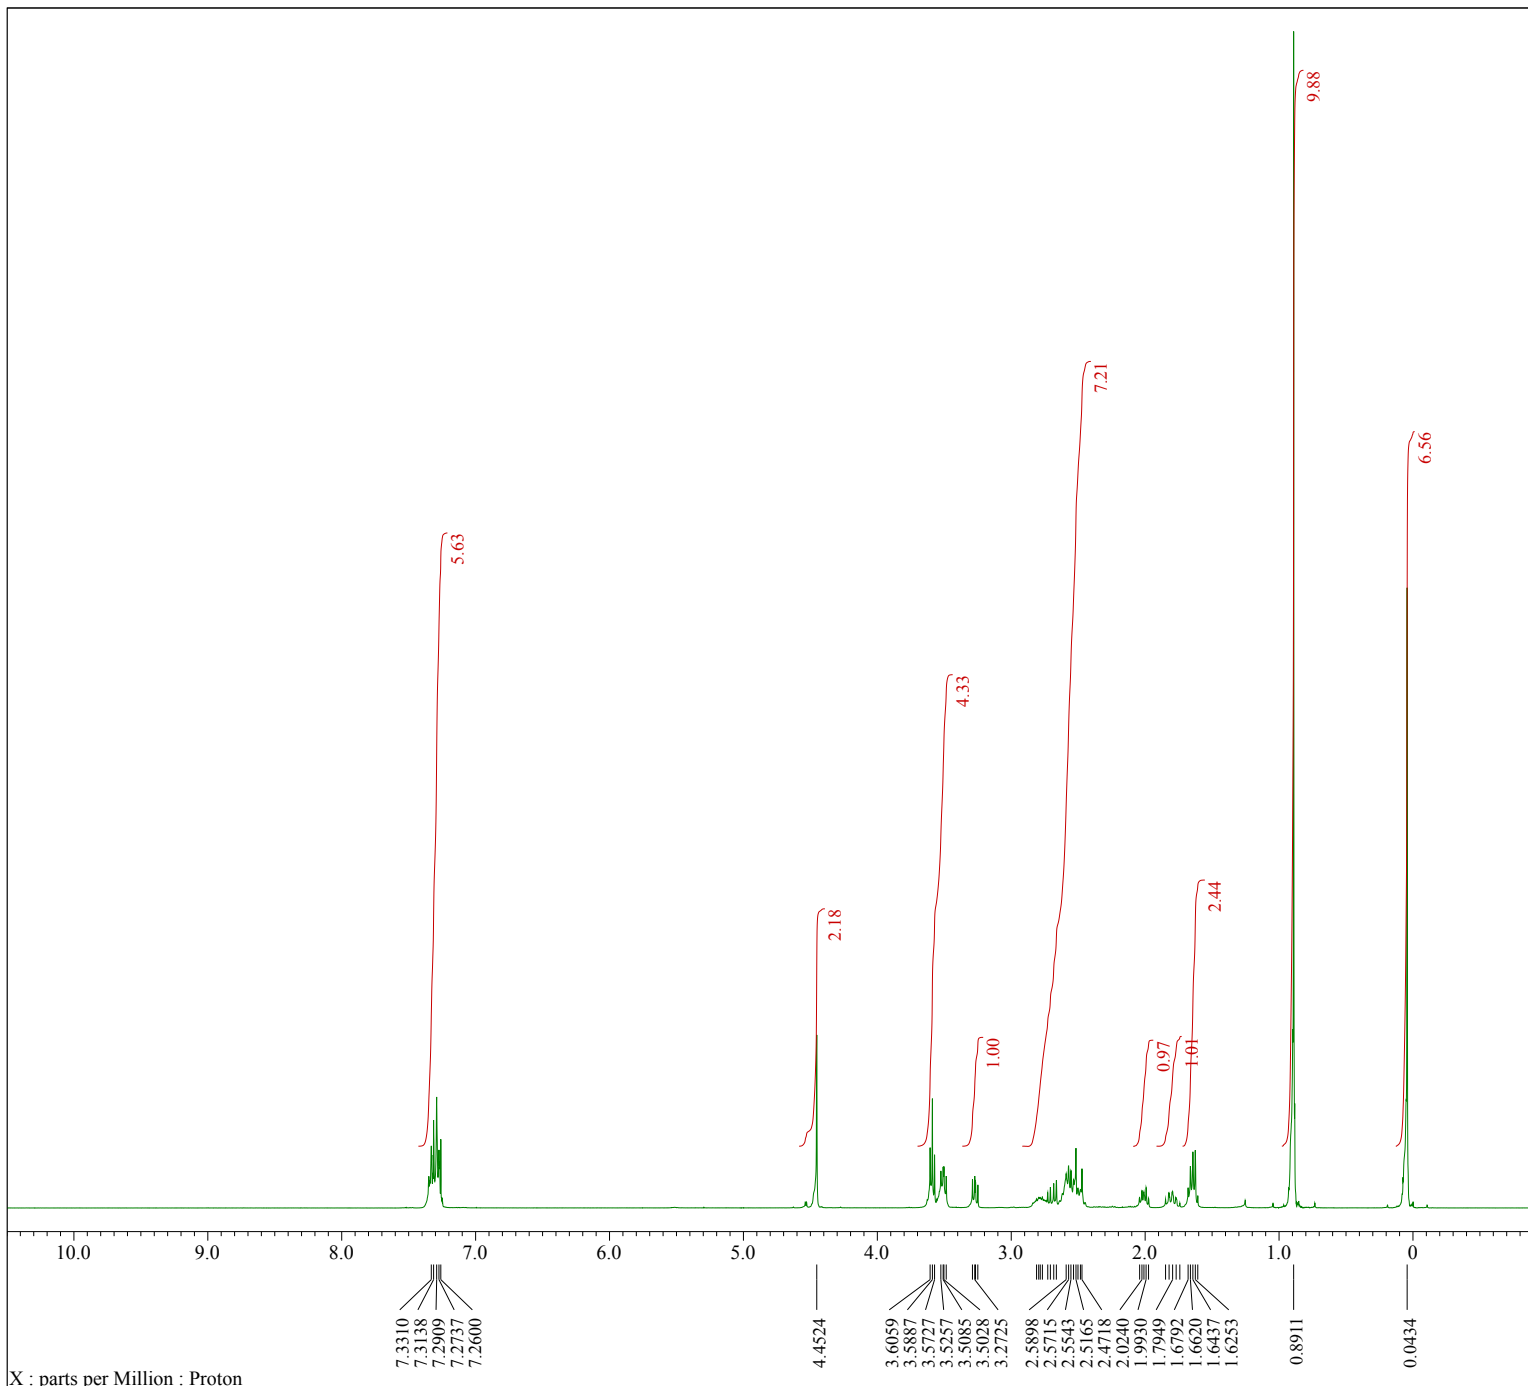

Filename = yk06071\_non-data-1-3.jd  
 Author = delta  
 Experiment = single\_pulse.jxp  
 Sample\_Id = yk06077  
 Solvent = CHLOROFORM-D  
 Creation Time = 12-JAN-2017 22:06:54  
 Revision Time = 20-FEB-2018 20:36:04  
 Current Time = 20-FEB-2018 20:36:44

Data Format = 1D COMPLEX  
 Dim\_Size = 13107  
 Dim\_Title = Proton  
 Dim\_Units = [ppm]  
 Dimensions = X  
 Site = JNM-ECS400  
 Spectrometer = DELTA2\_NMR

Field Strength = 9.389766[T] (400[MHz])  
 X\_Acq\_Duration = 2.18365952[s]  
 X\_Domain = 1H  
 X\_Freq = 399.78219838[MHz]  
 X\_Offset = 5[ppm]  
 X\_Points = 16384  
 X\_Prescans = 1  
 X\_Resolution = 0.45794685[Hz]  
 X\_Sweep = 7.5030012[kHz]  
 X\_Sweep\_Clipped = 6.00240096[kHz]  
 Irr\_Domain = Proton  
 Irr\_Freq = 399.78219838[MHz]  
 Irr\_Offset = 5[ppm]  
 Tri\_Domain = Proton  
 Tri\_Freq = 399.78219838[MHz]  
 Tri\_Offset = 5[ppm]  
 Clipped = FALSE  
 Scans = 8  
 Total\_Scans = 8

Relaxation\_Delay = 5[s]  
 Recvr\_Gain = 36  
 Temp\_Get = 21.9[dC]  
 X\_90\_Width = 10.025[us]  
 X\_Acq\_Time = 2.18365952[s]  
 X\_Angle = 45[deg]  
 X\_Atn = 1[dB]  
 X\_Pulse = 5.0125[us]  
 Irr\_Mode = Off  
 Tri\_Mode = Off  
 Dante\_Presat = FALSE  
 Initial\_Wait = 1[s]  
 Repetition Time = 7.18365952[s]

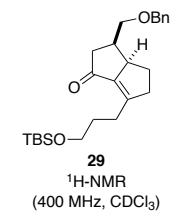

X : parts per Million : Proton



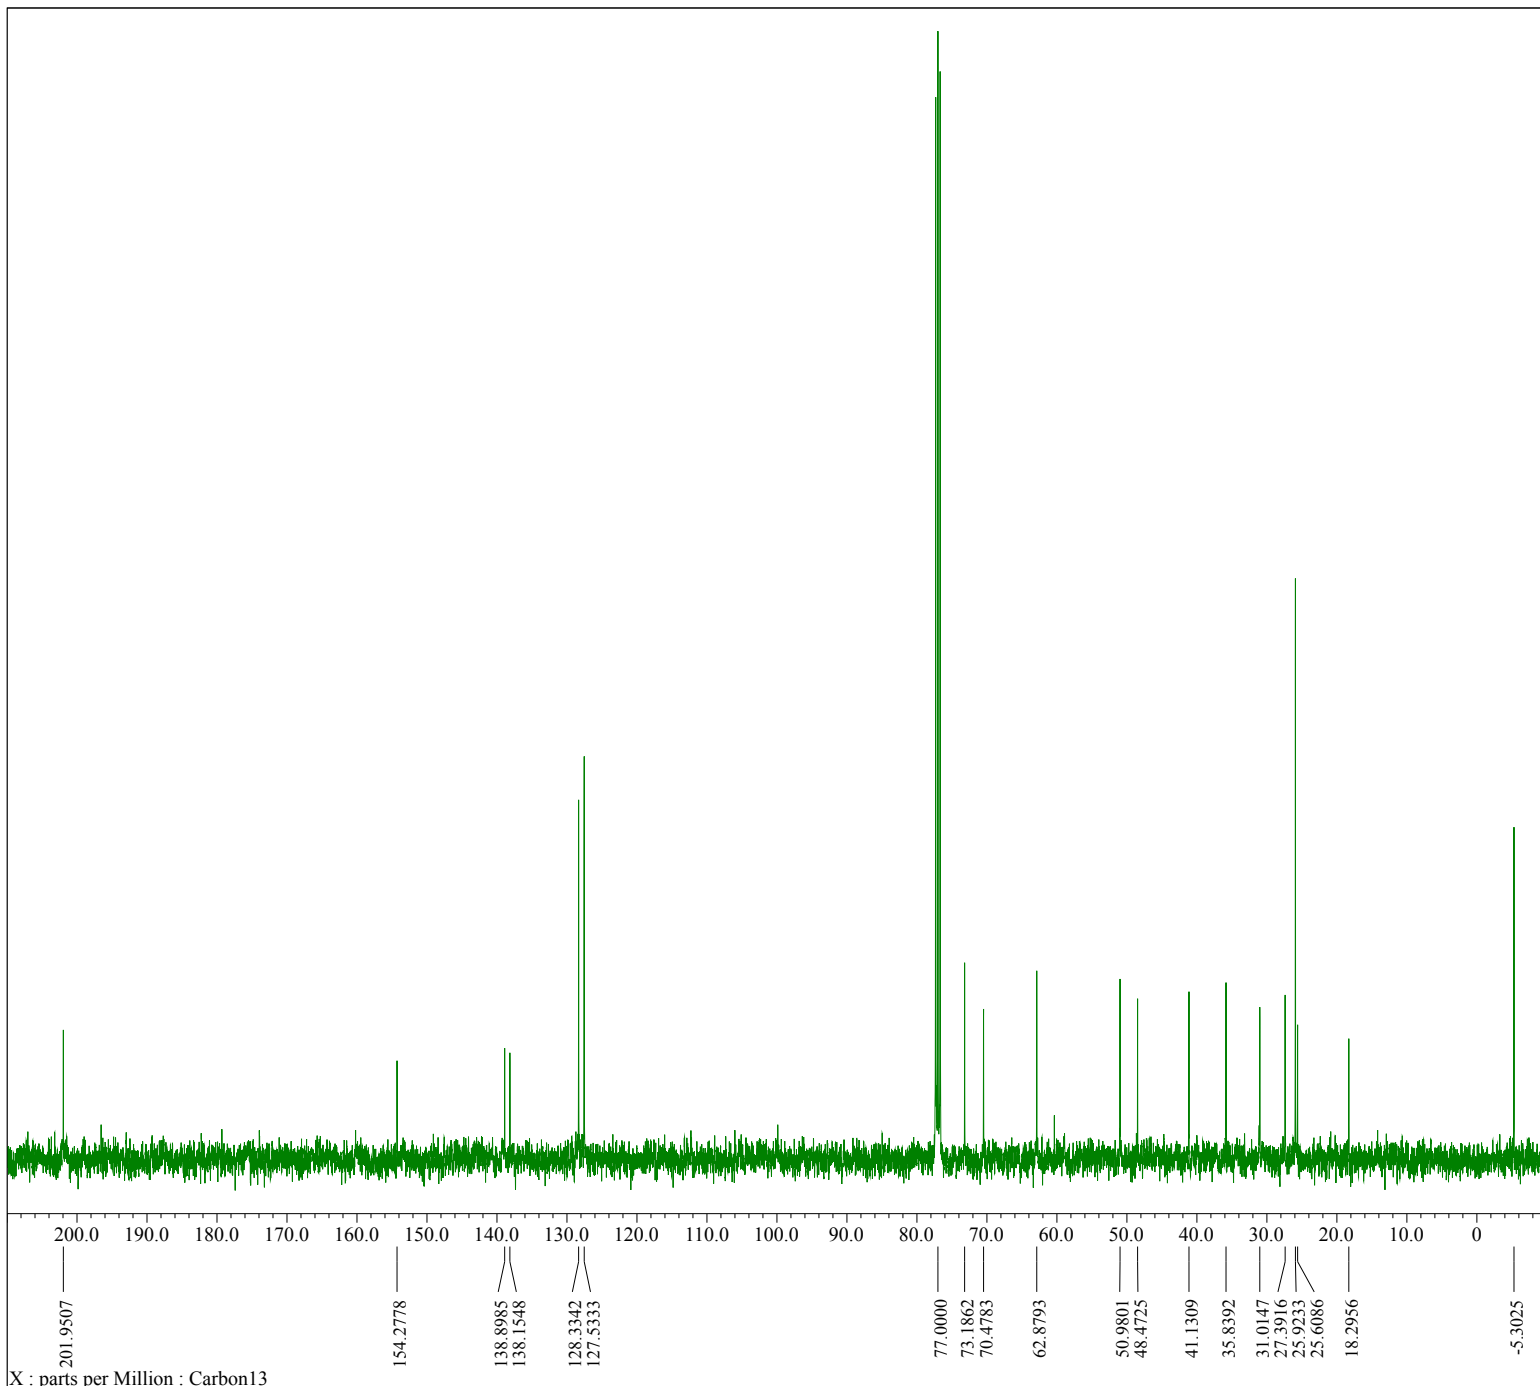

```

Filename      = yk06071data_bcm-1-3.jcf
Author       = delta
Experiment   = single_pulse_dec.jxp
Sample_Id    = yk06071data
Solvent      = CHLOROFORM-D
Creation Time = 13-JAN-2017 20:52:10
Revision Time = 20-FEB-2018 17:11:34
Current Time  = 20-FEB-2018 17:12:04

Data Format   = 1D COMPLEX
Dim_Size     = 26214
Dim_Title    = Carbon13
Dim_Units    = [ppm]
Dimensions   = X
Site         = JNM-ECS400
Spectrometer = DELTA2_NMR

Field Strength = 9.389766[T] (400[MHz])
X_Acq_Duration = 1.04333312[s]
X_Domain      = 13C
X_Freq        = 100.52530333[MHz]
X_Offset      = 100[ppm]
X_Points      = 32768
X_Prescans    = 4
X_Resolution  = 0.95846665[Hz]
X_Sweep       = 31.40703518[kHz]
X_Sweep_Clippped = 25.12562814[kHz]
Irr_Domain    = Proton
Irr_Freq      = 399.78219838[MHz]
Irr_Offset    = 5[ppm]
Clipped       = FALSE
Scans         = 128
Total_Scans   = 128

Relaxation_Delay = 1.5[s]
Recvr_Gain       = 50
Temp_Get         = 22.1[dC]
X_90_Width      = 8.7[us]
X_Acq_Time      = 1.04333312[s]
X_Angle         = 30[deg]
X_Atn           = 4[dB]
X_Pulse         = 2.9[us]
Irr_Atn_Dec     = 22.569[dB]
Irr_Atn_Noise  = 22.569[dB]
Irr_Noise       = WALTZ
Irr_Pwidth      = 0.115[ms]
Decoupling      = TRUE
Initial_Wait    = 1[s]
Noe              = TRUE
Noe_Time        = 1.5[s]

```

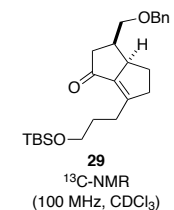

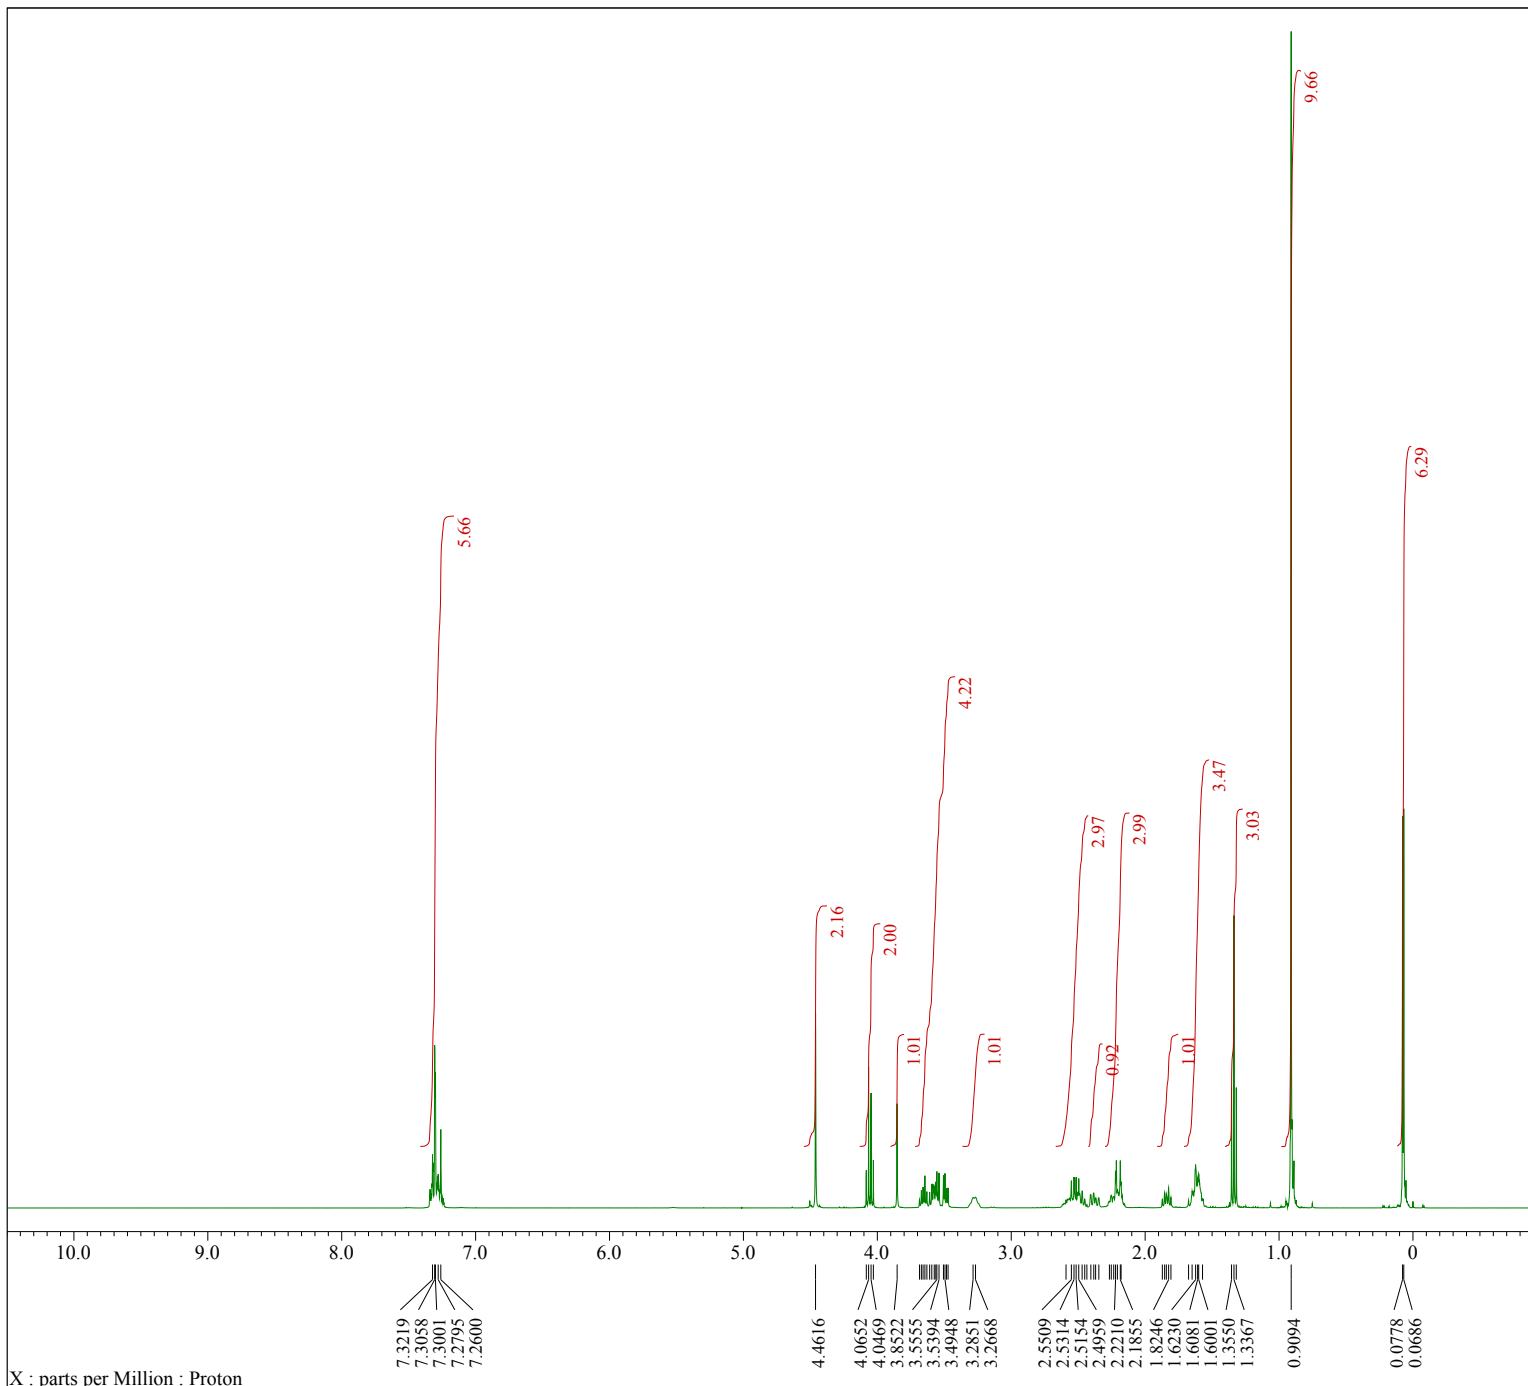

Filename = yk06072\_non-data-2-3.jd  
 Author = delta  
 Experiment = single\_pulse.jxp  
 Sample\_Id = yk06079  
 Solvent = CHLOROFORM-D  
 Creation Time = 12-JAN-2017 23:51:55  
 Revision Time = 20-FEB-2018 20:40:01  
 Current Time = 20-FEB-2018 20:40:50

Data Format = 1D COMPLEX  
 Dim\_Size = 13107  
 Dim Title = Proton  
 Dim Units = [ppm]  
 Dimensions = X  
 Site = JNM-ECS400  
 Spectrometer = DELTA2\_NMR

Field Strength = 9.389766[T] (400[MHz])  
 X\_Acq\_Duration = 2.18365952[s]  
 X\_Domain = 1H  
 X\_Freq = 399.78219838[MHz]  
 X\_Offset = 5[ppm]  
 X\_Points = 16384  
 X\_Prescans = 1  
 X\_Resolution = 0.45794685[Hz]  
 X\_Sweep = 7.5030012[kHz]  
 X\_Sweep\_Clippped = 6.00240096[kHz]  
 Irr\_Domain = Proton  
 Irr\_Freq = 399.78219838[MHz]  
 Irr\_Offset = 5[ppm]  
 Tri\_Domain = Proton  
 Tri\_Freq = 399.78219838[MHz]  
 Tri\_Offset = 5[ppm]  
 Clipped = FALSE  
 Scans = 8  
 Total\_Scans = 8

Relaxation\_Delay = 5[s]  
 Recvr\_Gain = 34  
 Temp\_Get = 21.9[dC]  
 X\_90\_Width = 10.025[us]  
 X\_Acq\_Time = 2.18365952[s]  
 X\_Angle = 45[deg]  
 X\_Atn = 1[dB]  
 X\_Pulse = 5.0125[us]  
 Irr\_Mode = Off  
 Tri\_Mode = Off  
 Dante\_Presat = FALSE  
 Initial\_Wait = 1[s]  
 Repetition Time = 7.18365952[s]

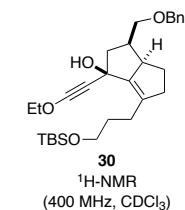

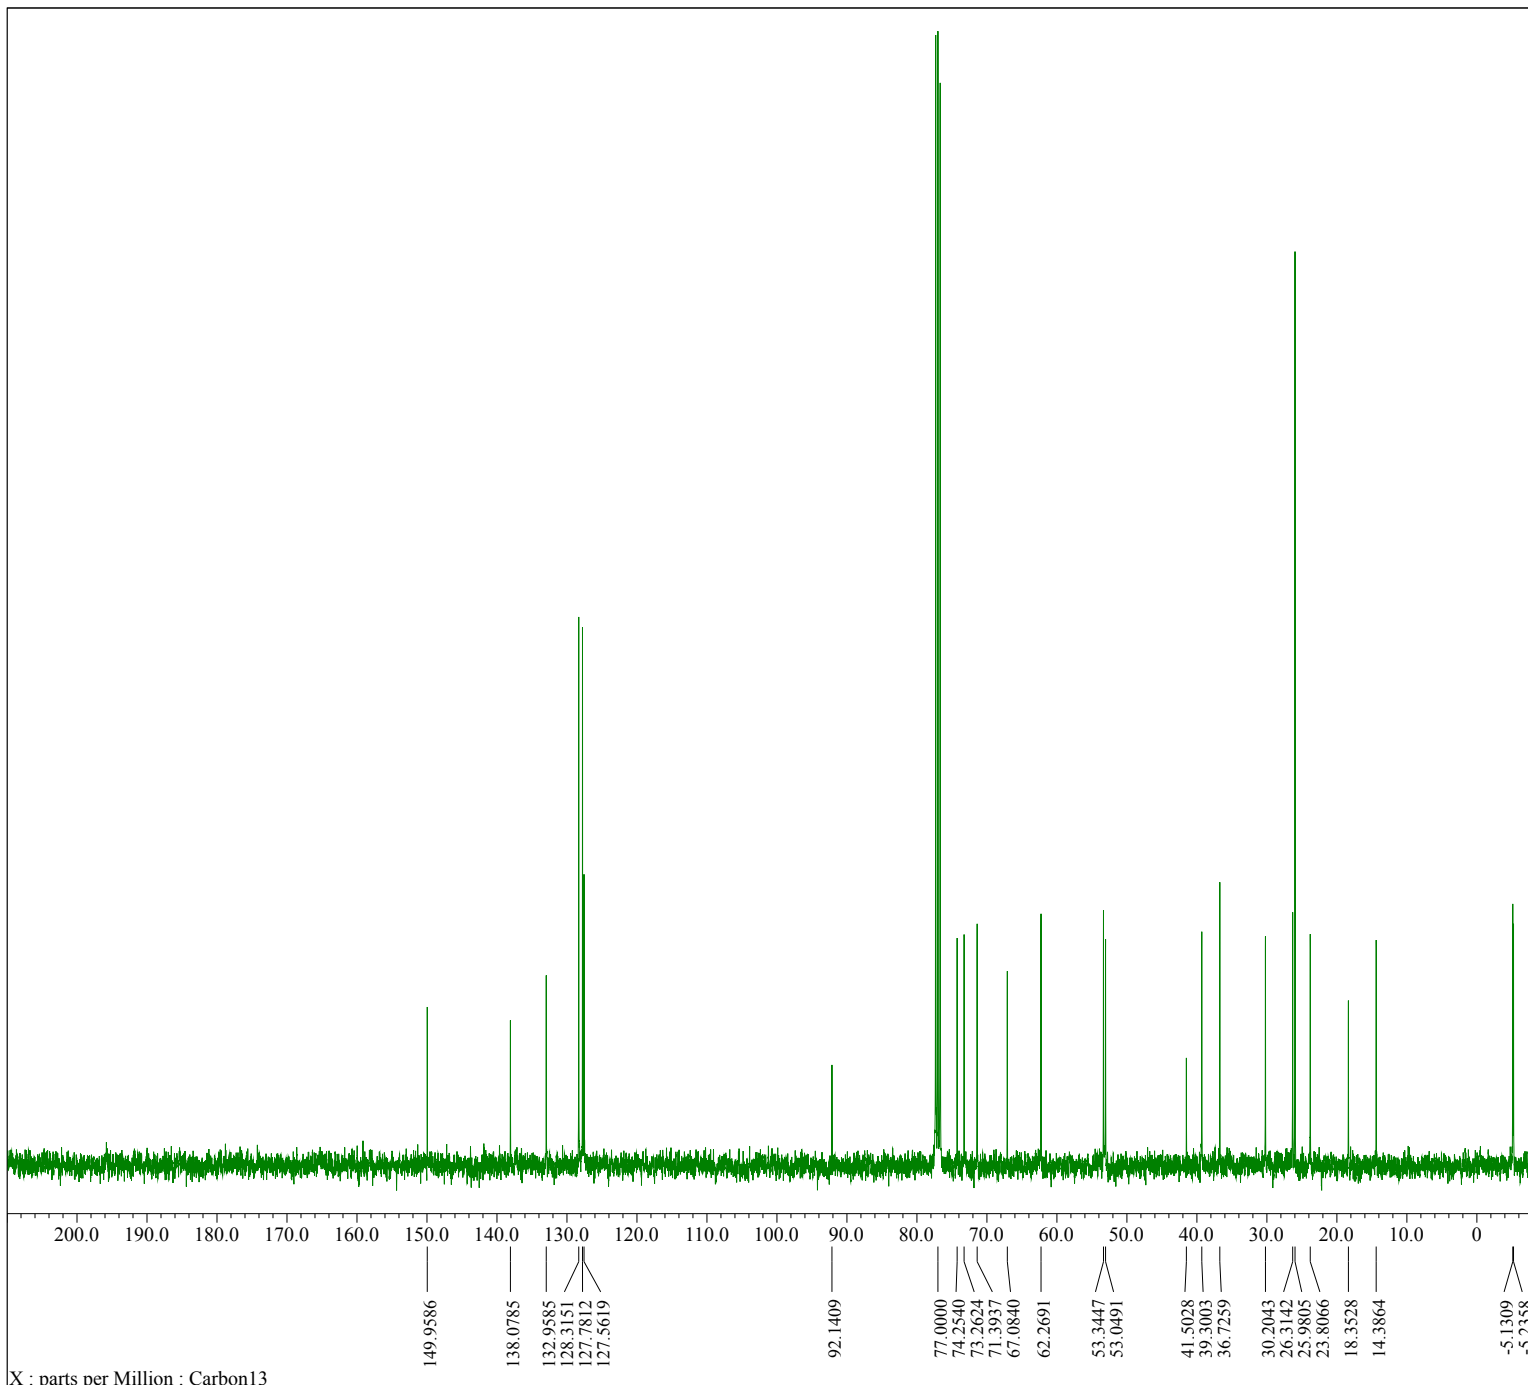

```

Filename      = yk06072data_bcm-1-3.jcf
Author       = delta
Experiment   = single_pulse_dec.jxp
Sample_Id    = yk06072data
Solvent      = CHLOROFORM-D
Creation Time = 13-NOV-2016 17:26:34
Revision Time = 20-FEB-2018 17:14:03
Current Time  = 20-FEB-2018 17:14:48

Data Format   = 1D COMPLEX
Dim_Size     = 26214
Dim_Title    = Carbon13
Dim_Units    = [ppm]
Dimensions   = X
Site         = JNM-ECS400
Spectrometer = DELTA2_NMR

Field Strength = 9.389766[T] (400[MHz])
X_Acq_Duration = 1.04333312[s]
X_Domain      = 13C
X_Freq        = 100.52530333[MHz]
X_Offset      = 100[ppm]
X_Points      = 32768
X_Prescans    = 4
X_Resolution  = 0.95846665[Hz]
X_Sweep       = 31.40703518[kHz]
X_Sweep_Clip  = 25.12562814[kHz]
Irr_Domain    = Proton
Irr_Freq      = 399.78219838[MHz]
Irr_Offset    = 5[ppm]
Clipped       = FALSE
Scans         = 128
Total_Scans   = 128

Relaxation_Delay = 1.5[s]
Recvr_Gain       = 50
Temp_Get         = 23.3[dC]
X_90_Width      = 8.7[us]
X_Acq_Time      = 1.04333312[s]
X_Angle         = 30[deg]
X_Atn           = 4[dB]
X_Pulse         = 2.9[us]
Irr_Atn_Dec     = 22.569[dB]
Irr_Atn_Noise  = 22.569[dB]
Irr_Noise      = WALTZ
Irr_Pwidth     = 0.115[ms]
Decoupling      = TRUE
Initial_Wait    = 1[s]
Noe              = TRUE
Noe Time        = 1.5[s]
  
```

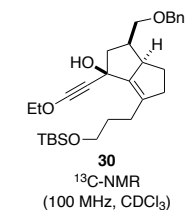

X : parts per Million : Carbon13

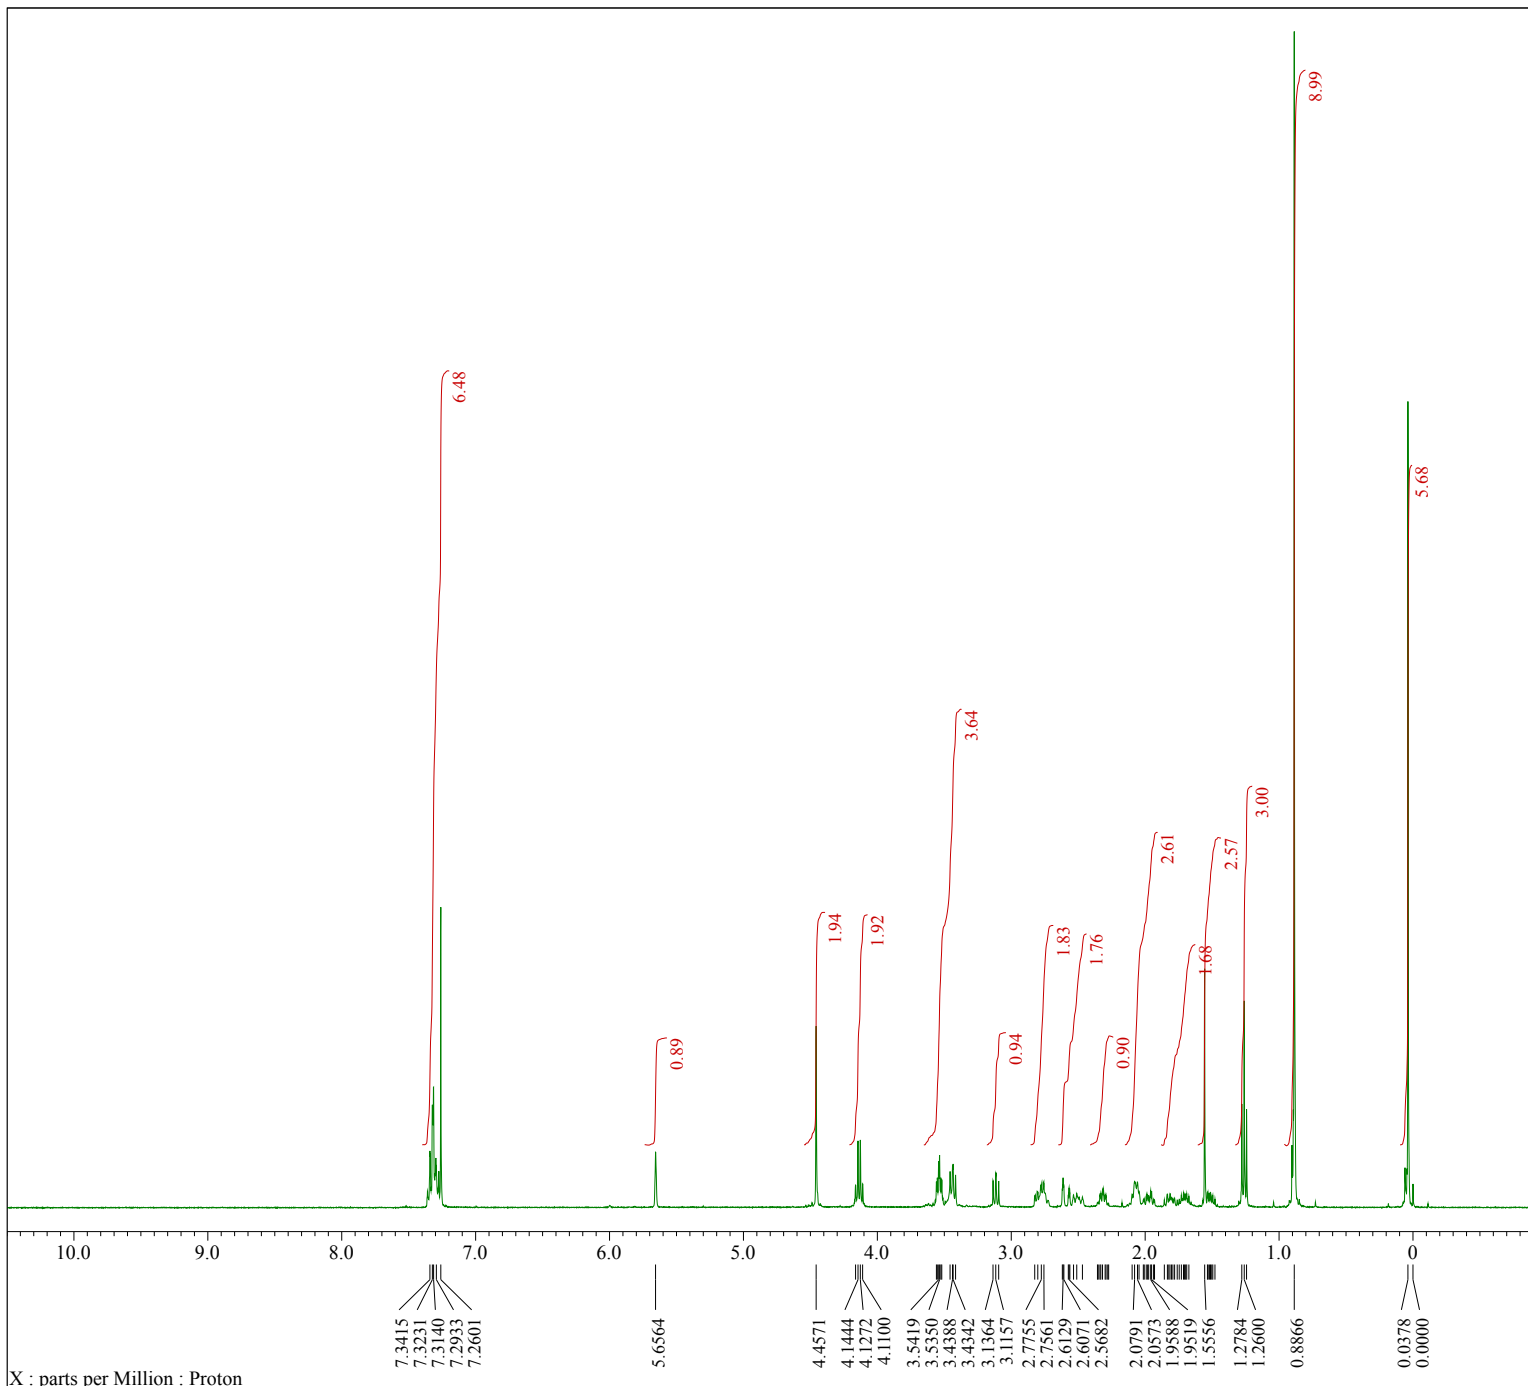

Filename = yk06073data\_non-data-1-  
 Author = delta  
 Experiment = single\_pulse.jxp  
 Sample\_Id = yk06080data  
 Solvent = CHLOROFORM-D  
 Creation Time = 13-JAN-2017 17:54:50  
 Revision Time = 20-FEB-2018 20:44:45  
 Current Time = 20-FEB-2018 20:45:11

Data Format = 1D COMPLEX  
 Dim\_Size = 13107  
 Dim\_Title = Proton  
 Dim\_Units = [ppm]  
 Dimensions = X  
 Site = JNM-ECS400  
 Spectrometer = DELTA2\_NMR

Field Strength = 9.389766[T] (400[MHz])  
 X\_Acq\_Duration = 2.18365952[s]  
 X\_Domain = 1H  
 X\_Freq = 399.78219838[MHz]  
 X\_Offset = 5[ppm]  
 X\_Points = 16384  
 X\_Prescans = 1  
 X\_Resolution = 0.45794685[Hz]  
 X\_Sweep = 7.5030012[kHz]  
 X\_Sweep\_Clippped = 6.00240096[kHz]  
 Irr\_Domain = Proton  
 Irr\_Freq = 399.78219838[MHz]  
 Irr\_Offset = 5[ppm]  
 Tri\_Domain = Proton  
 Tri\_Freq = 399.78219838[MHz]  
 Tri\_Offset = 5[ppm]  
 Clipped = TRUE  
 Scans = 8  
 Total\_Scans = 8

Relaxation\_Delay = 5[s]  
 Recvr\_Gain = 50  
 Temp\_Get = 22.2[dC]  
 X\_90\_Width = 10.025[us]  
 X\_Acq\_Time = 2.18365952[s]  
 X\_Angle = 45[deg]  
 X\_Atn = 1[dB]  
 X\_Pulse = 5.0125[us]  
 Irr\_Mode = Off  
 Tri\_Mode = Off  
 DanTe\_Presat = FALSE  
 Initial\_Wait = 1[s]  
 Repetition Time = 7.18365952[s]

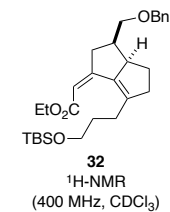

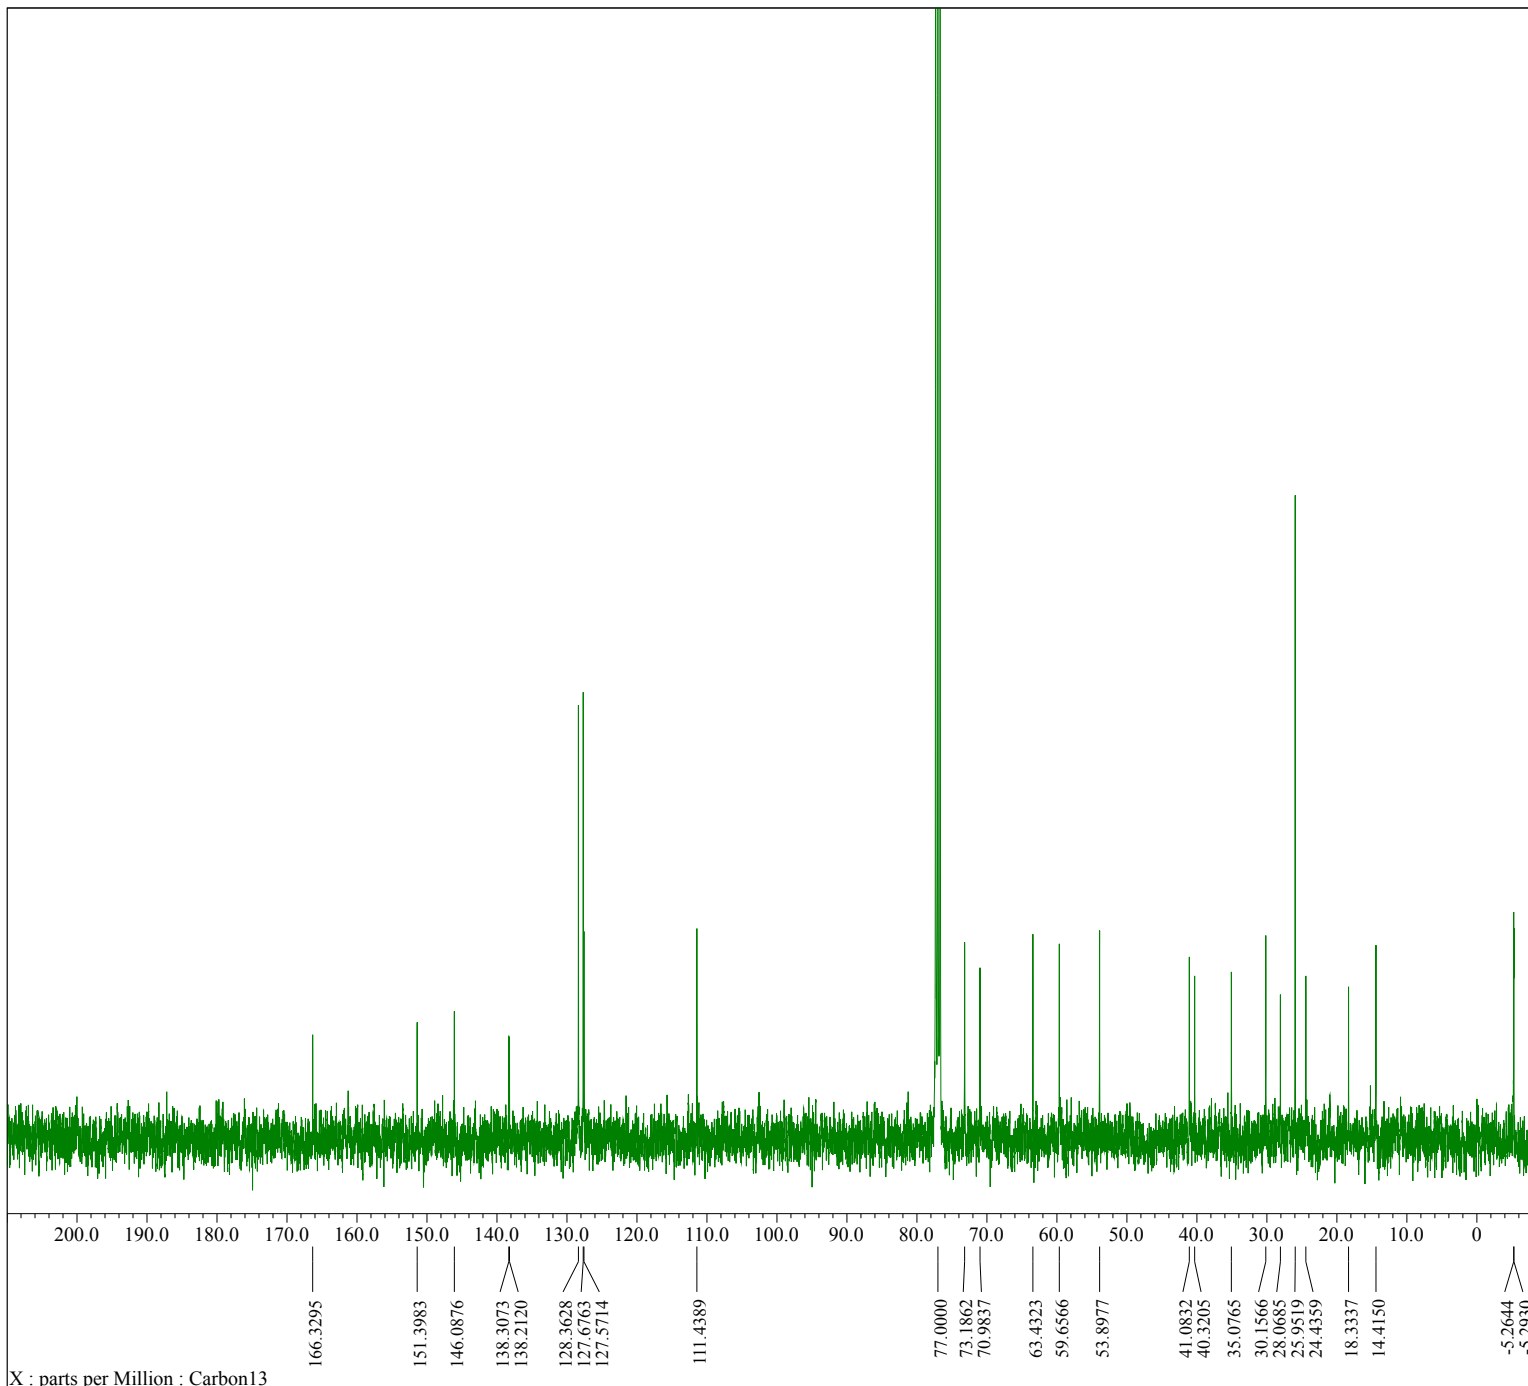

```

Filename      = yk06073_bcm-2-3.jdf
Author       = delta
Experiment   = single_pulse_dec.jxp
Sample_Id    = yk06073
Solvent      = CHLOROFORM-D
Creation Time = 13-JAN-2017 22:32:00
Revision Time = 20-FEB-2018 17:16:57
Current Time  = 20-FEB-2018 17:17:31

Data Format   = 1D COMPLEX
Dim_Size     = 26214
Dim_Title    = Carbon13
Dim_Units    = [ppm]
Dimensions   = X
Site         = JNM-ECS400
Spectrometer = DELTA2_NMR

Field Strength = 9.389766[T] (400[MHz])
X_Acq_Duration = 1.04333312[s]
X_Domain      = 13C
X_Freq        = 100.52530333[MHz]
X_Offset      = 100[ppm]
X_Points      = 32768
X_Prescans    = 4
X_Resolution  = 0.95846665[Hz]
X_Sweep       = 31.40703518[kHz]
X_Sweep_Clip  = 25.12562814[kHz]
Irr_Domain    = Proton
Irr_Freq      = 399.78219838[MHz]
Irr_Offset    = 5[ppm]
Clipped       = FALSE
Scans         = 512
Total_Scans   = 512

Relaxation_Delay = 1.5[s]
Recvr_Gain      = 50
Temp_Get        = 22.1[dC]
X_90_Width     = 8.7[us]
X_Acq_Time     = 1.04333312[s]
X_Angle        = 30[deg]
X_Atn          = 4[dB]
X_Pulse        = 2.9[us]
Irr_Atn_Dec    = 22.569[dB]
Irr_Atn_Noise = 22.569[dB]
Irr_Noise      = WALTZ
Irr_Pwidth     = 0.115[ms]
Decoupling     = TRUE
Initial_Wait   = 1[s]
Noe            = TRUE
Noe Time       = 1.5[s]

```

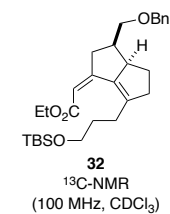

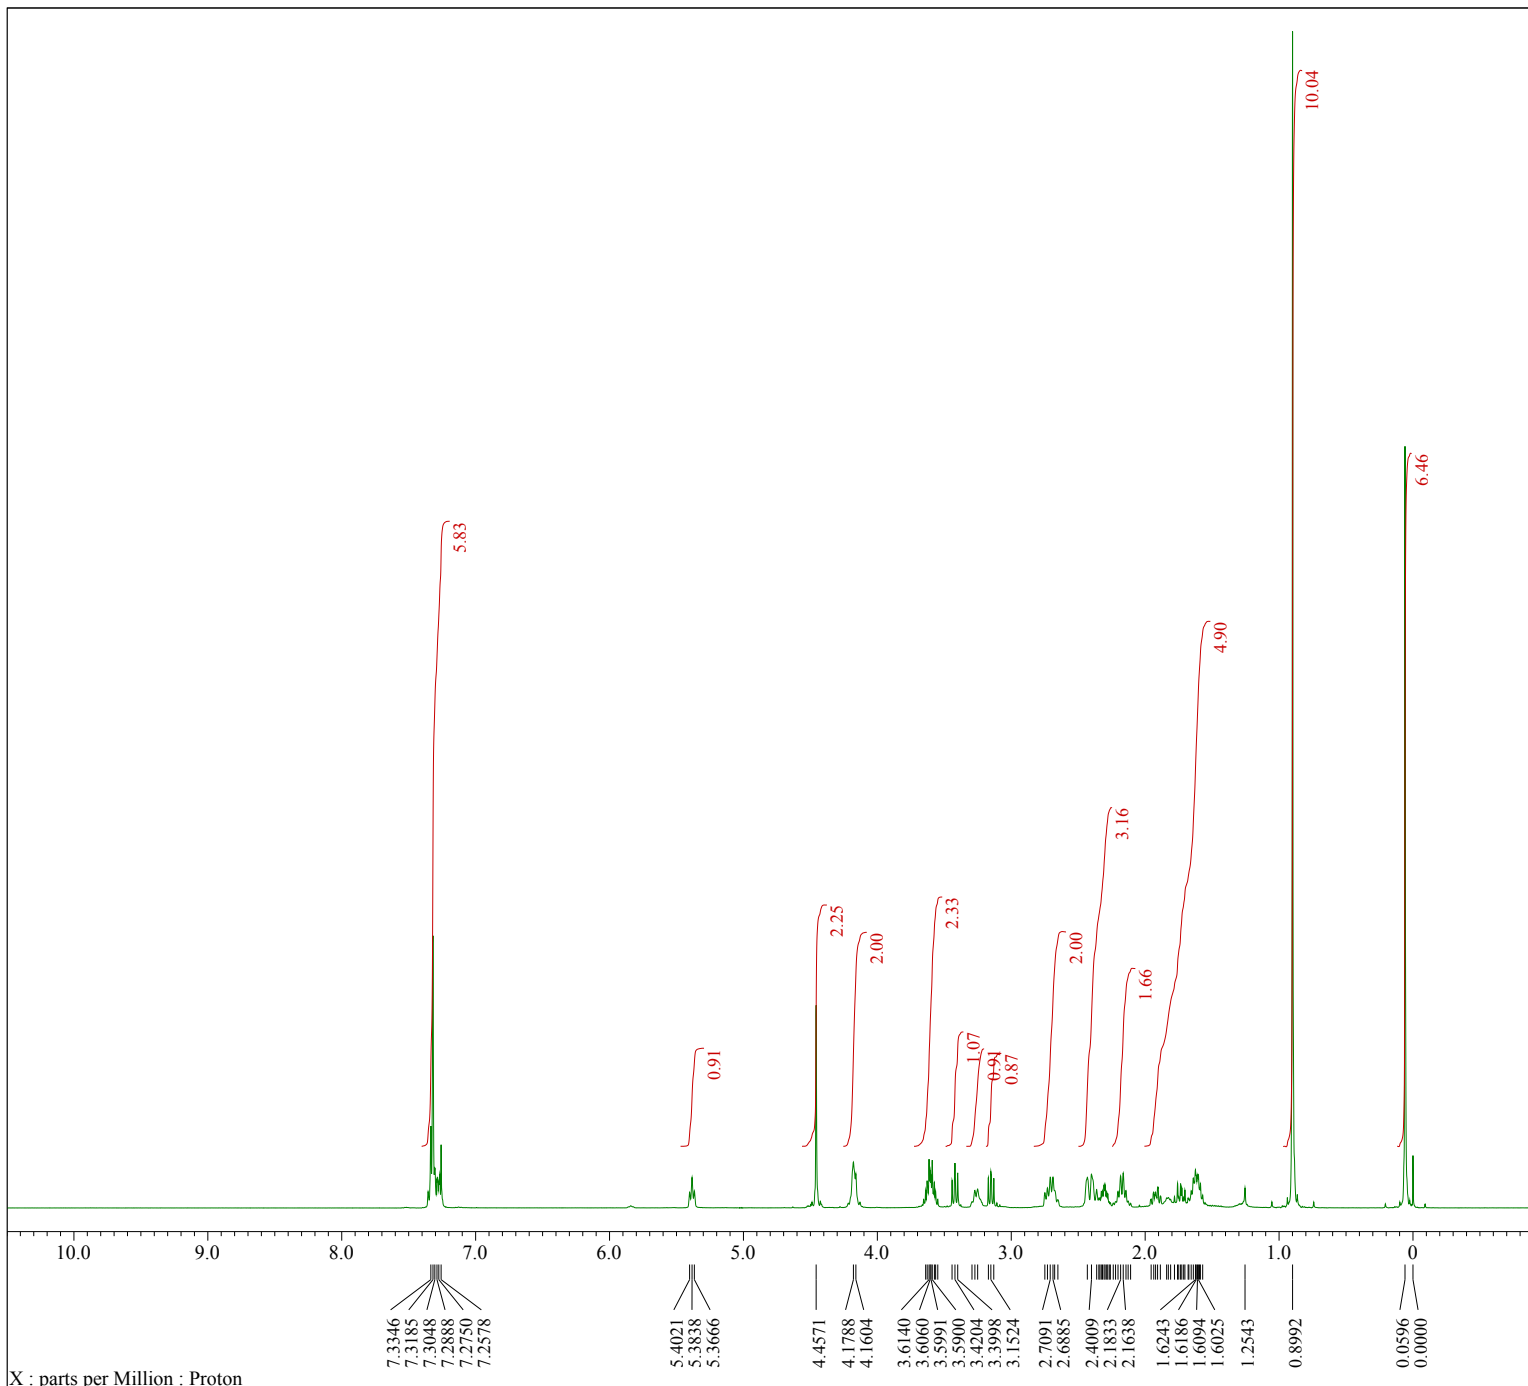

Filename = yk06078pt\_non-data-1-3.  
 Author = delta  
 Experiment = single\_pulse.jxp  
 Sample\_Id = yk06078pt  
 Solvent = CHLOROFORM-D  
 Creation Time = 13-NOV-2016 18:14:30  
 Revision Time = 20-FEB-2018 20:48:59  
 Current Time = 20-FEB-2018 20:50:20

Data Format = 1D COMPLEX  
 Dim\_Size = 13107  
 Dim\_Title = Proton  
 Dim\_Units = [ppm]  
 Dimensions = X  
 Site = JNM-ECS400  
 Spectrometer = DELTA2\_NMR

Field Strength = 9.389766[T] (400[MHz])  
 X\_Acq\_Duration = 2.18365952[s]  
 X\_Domain = 1H  
 X\_Freq = 399.78219838[MHz]  
 X\_Offset = 5[ppm]  
 X\_Points = 16384  
 X\_Prescans = 1  
 X\_Resolution = 0.45794685[Hz]  
 X\_Sweep = 7.5030012[kHz]  
 X\_Sweep\_Clippped = 6.00240096[kHz]  
 Irr\_Domain = Proton  
 Irr\_Freq = 399.78219838[MHz]  
 Irr\_Offset = 5[ppm]  
 Tri\_Domain = Proton  
 Tri\_Freq = 399.78219838[MHz]  
 Tri\_Offset = 5[ppm]  
 Clipped = FALSE  
 Scans = 8  
 Total\_Scans = 8

Relaxation\_Delay = 5[s]  
 Recvr\_Gain = 30  
 Temp\_Get = 23.2[dC]  
 X\_90\_Width = 10.025[us]  
 X\_Acq\_Time = 2.18365952[s]  
 X\_Angle = 45[deg]  
 X\_Atn = 1[dB]  
 X\_Pulse = 5.0125[us]  
 Irr\_Mode = Off  
 Tri\_Mode = Off  
 Dante\_Presat = FALSE  
 Initial\_Wait = 1[s]  
 Repetition Time = 7.18365952[s]

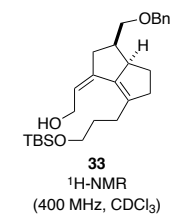

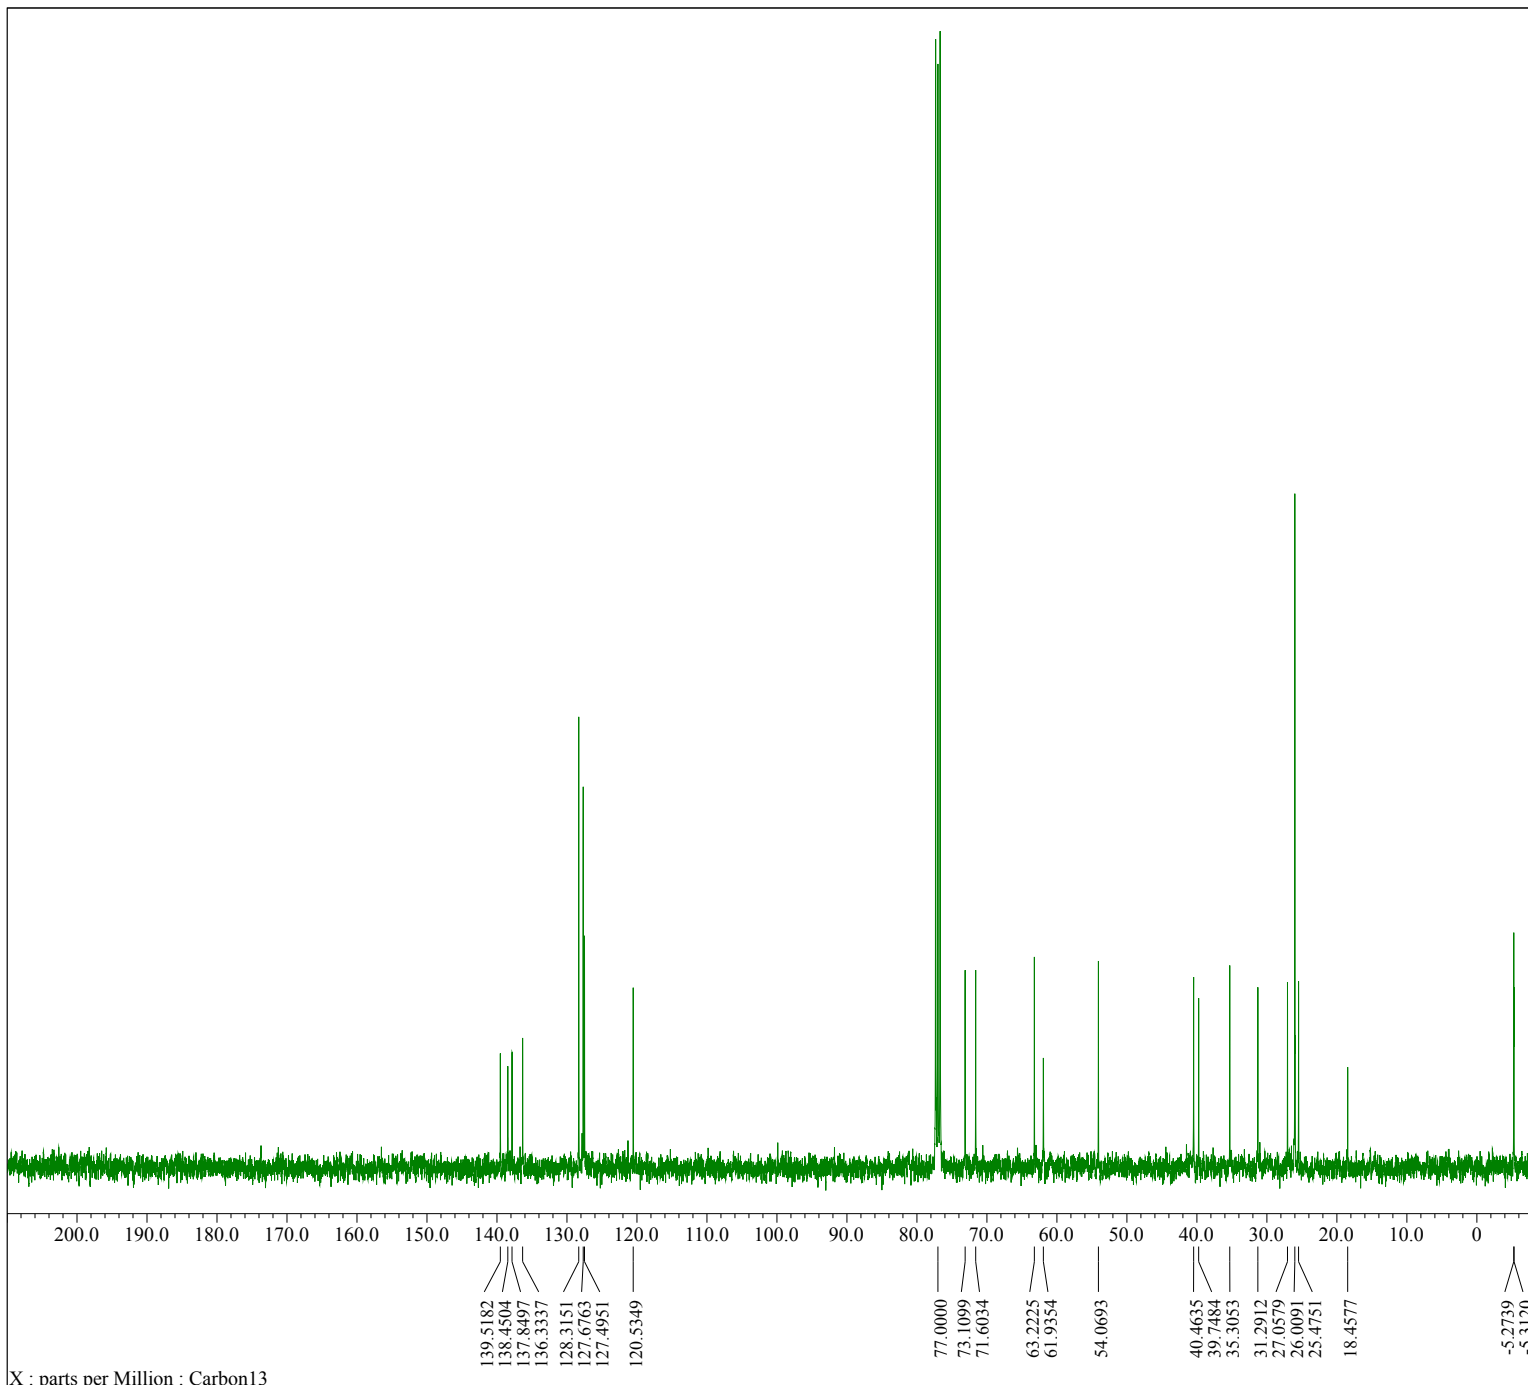

```

Filename      = yk06078pt_bcm-1-3.jdf
Author       = delta
Experiment   = single_pulse_dec.jxp
Sample_Id    = yk06078pt
Solvent      = CHLOROFORM-D
Creation Time = 13-NOV-2016 18:22:13
Revision Time = 20-FEB-2018 17:19:07
Current Time  = 20-FEB-2018 17:19:38

Data Format   = 1D COMPLEX
Dim_Size     = 26214
Dim_Title    = Carbon13
Dim_Units    = [ppm]
Dimensions   = X
Site         = JNM-ECS400
Spectrometer = DELTA2_NMR

Field Strength = 9.389766[T] (400[MHz])
X_Acq_Duration = 1.04333312[s]
X_Domain      = 13C
X_Freq        = 100.52530333[MHz]
X_Offset      = 100[ppm]
X_Points      = 32768
X_Prescans    = 4
X_Resolution  = 0.95846665[Hz]
X_Sweep       = 31.40703518[kHz]
X_Sweep_Clip  = 25.12562814[kHz]
Irr_Domain    = Proton
Irr_Freq      = 399.78219838[MHz]
Irr_Offset    = 5[ppm]
Clipped       = FALSE
Scans         = 128
Total_Scans   = 128

Relaxation_Delay = 1.5[s]
Recvr_Gain      = 50
Temp_Get        = 23.3[dC]
X_90_Width     = 8.7[us]
X_Acq_Time     = 1.04333312[s]
X_Angle        = 30[deg]
X_Atn          = 4[dB]
X_Pulse        = 2.9[us]
Irr_Atn_Dec    = 22.569[dB]
Irr_Atn_Noise = 22.569[dB]
Irr_Noise     = WALTZ
Irr_Pwidth    = 0.115[ms]
Decoupling     = TRUE
Initial_Wait   = 1[s]
Noe            = TRUE
Noe Time       = 1.5[s]

```

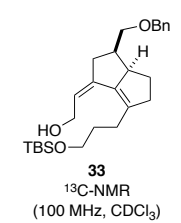

X : parts per Million : Carbon13

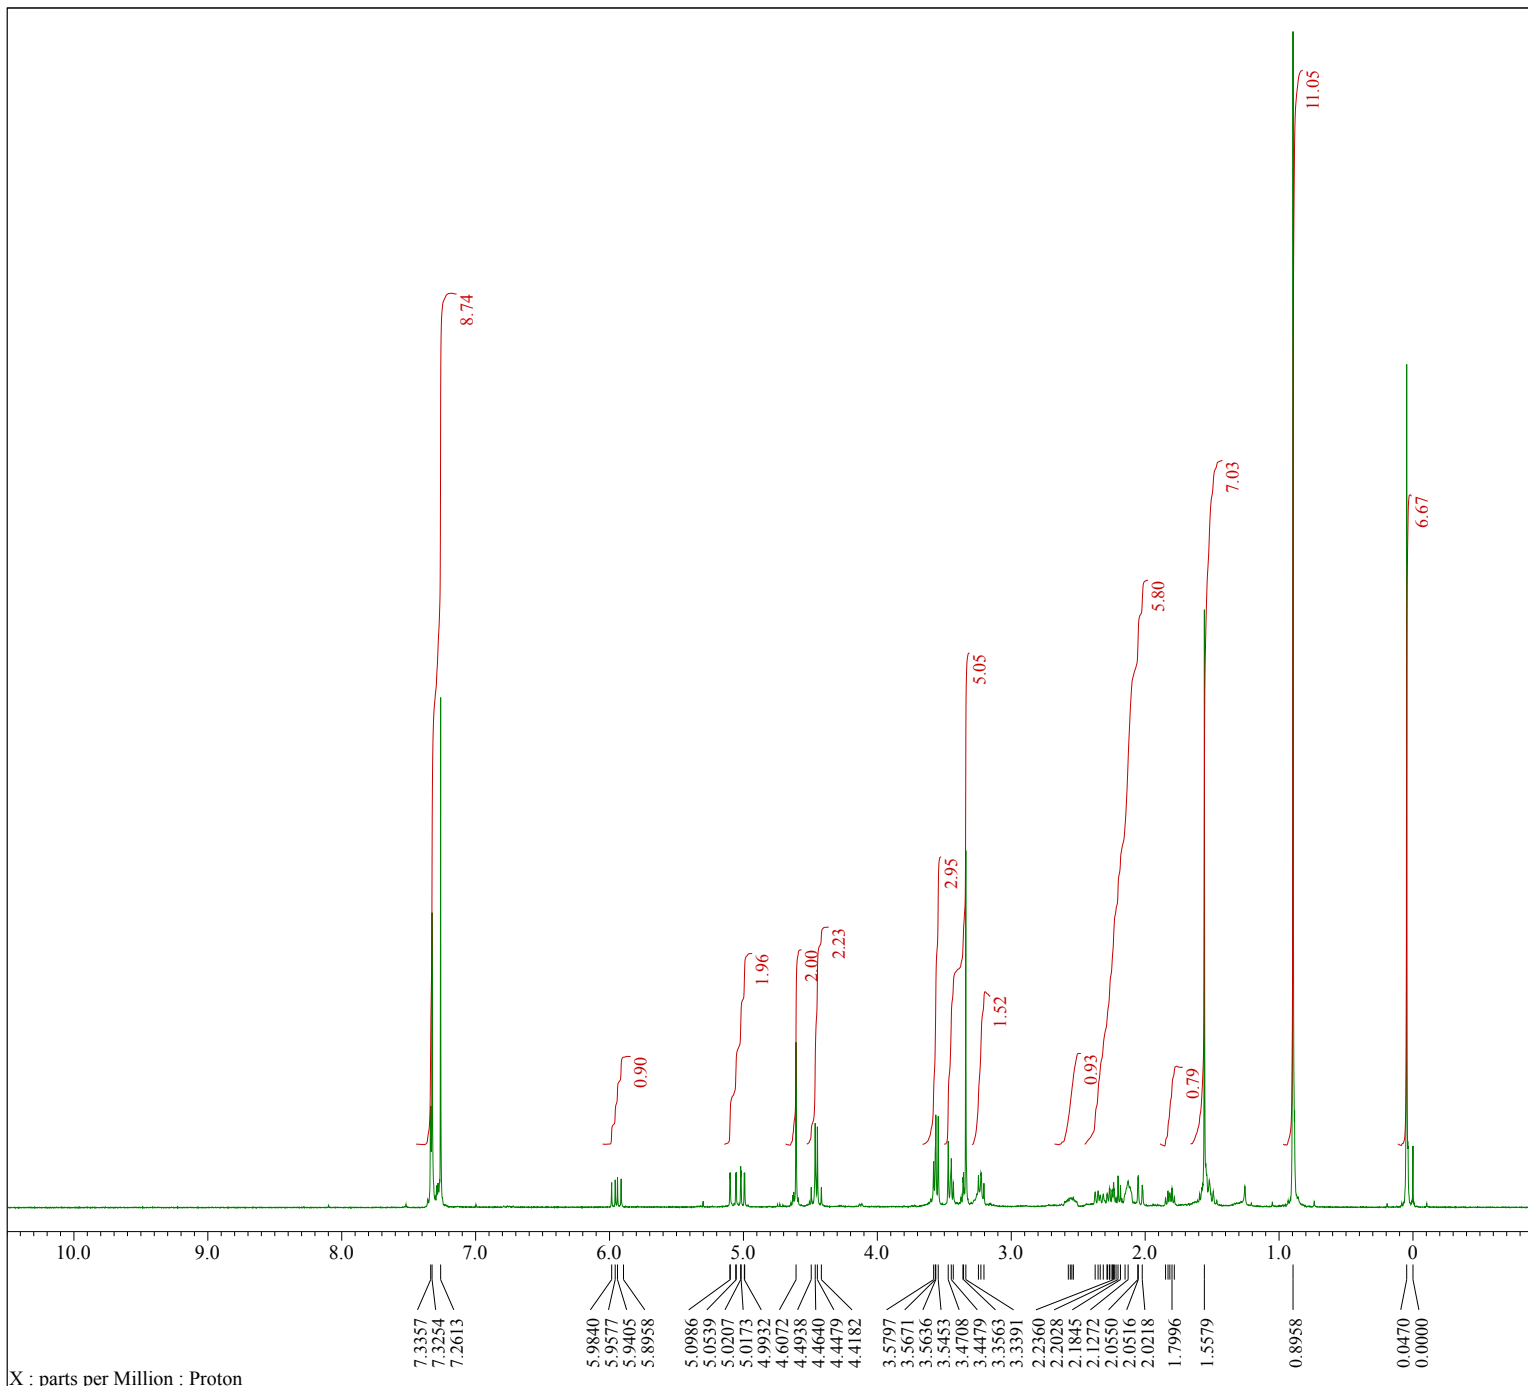

Filename = yk06103data\_non-data-1-  
 Author = delta  
 Experiment = single\_pulse.jxp  
 Sample\_Id = yk06103data  
 Solvent = CHLOROFORM-D  
 Creation Time = 9-JAN-2017 13:00:47  
 Revision Time = 20-FEB-2018 20:54:20  
 Current Time = 20-FEB-2018 20:54:58

Data Format = 1D COMPLEX  
 Dim\_Size = 13107  
 Dim\_Title = Proton  
 Dim\_Units = [ppm]  
 Dimensions = X  
 Site = JNM-ECS400  
 Spectrometer = DELTA2\_NMR

Field Strength = 9.389766[T] (400[MHz])  
 X\_Acq\_Duration = 2.18365952[s]  
 X\_Domain = 1H  
 X\_Freq = 399.78219838[MHz]  
 X\_Offset = 5[ppm]  
 X\_Points = 16384  
 X\_Prescans = 1  
 X\_Resolution = 0.45794685[Hz]  
 X\_Sweep = 7.5030012[kHz]  
 X\_Sweep\_Clippped = 6.00240096[kHz]  
 Irr\_Domain = Proton  
 Irr\_Freq = 399.78219838[MHz]  
 Irr\_Offset = 5[ppm]  
 Tri\_Domain = Proton  
 Tri\_Freq = 399.78219838[MHz]  
 Tri\_Offset = 5[ppm]  
 Clipped = FALSE  
 Scans = 16  
 Total\_Scans = 16

Relaxation\_Delay = 5[s]  
 Recvr\_Gain = 44  
 Temp\_Get = 21.8[dC]  
 X\_90\_Width = 10.025[us]  
 X\_Acq\_Time = 2.18365952[s]  
 X\_Angle = 45[deg]  
 X\_Atn = 1[dB]  
 X\_Pulse = 5.0125[us]  
 Irr\_Mode = Off  
 Tri\_Mode = Off  
 DanTe\_Presat = FALSE  
 Initial\_Wait = 1[s]  
 Repetition Time = 7.18365952[s]

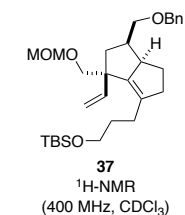



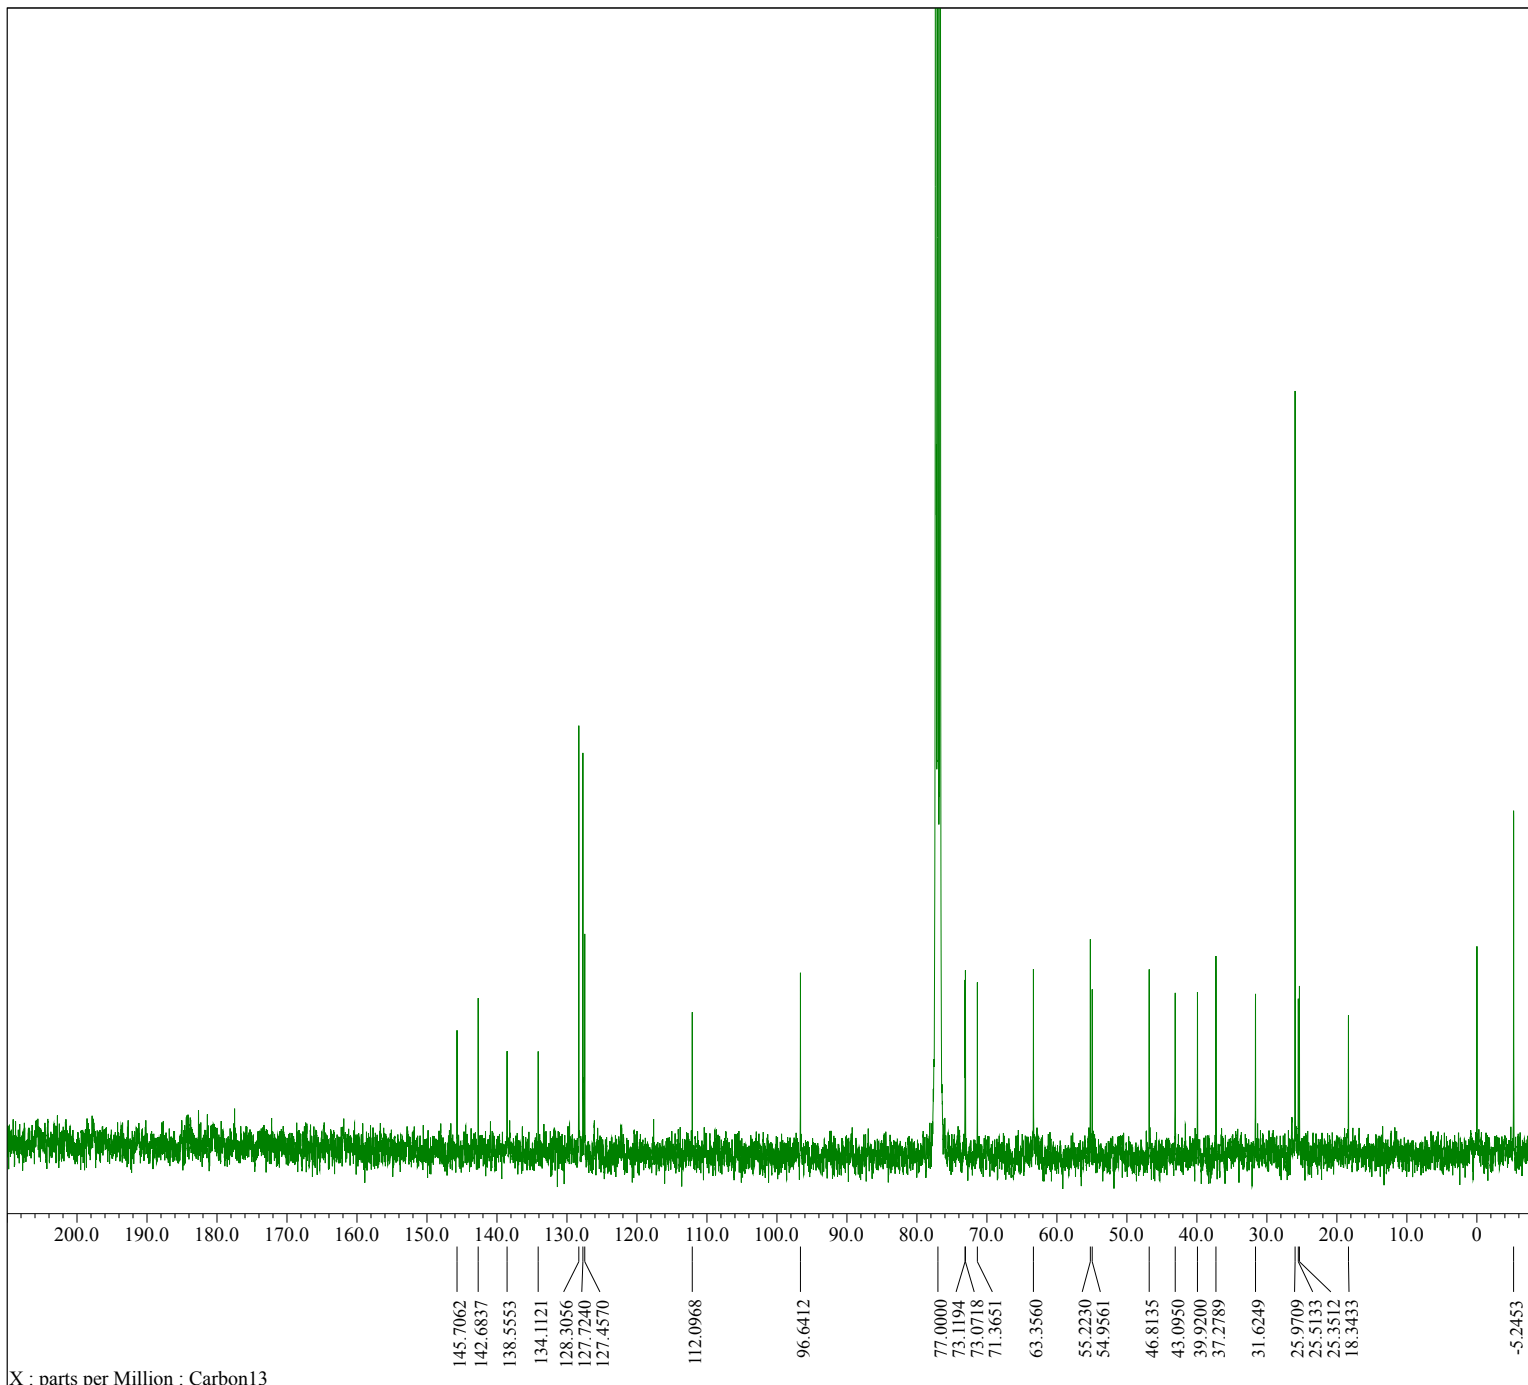

```

Filename      = yk06103_bcm-1-3.jdf
Author       = delta
Experiment   = single_pulse_dec.jxp
Sample_Id    = 103
Solvent      = CHLOROFORM-D
Creation Time = 15-JAN-2017 11:36:02
Revision Time = 20-FEB-2018 17:21:40
Current Time  = 20-FEB-2018 17:22:28

Data Format   = 1D COMPLEX
Dim_Size     = 26214
Dim_Title    = Carbon13
Dim_Units    = [ppm]
Dimensions   = X
Site         = JNM-ECS400
Spectrometer = DELTA2_NMR

Field Strength = 9.389766[T] (400[MHz])
X_Acq_Duration = 1.04333312[s]
X_Domain       = 13C
X_Freq         = 100.52530333[MHz]
X_Offset       = 100[ppm]
X_Points       = 32768
X_Prescans     = 4
X_Resolution   = 0.95846665[Hz]
X_Sweep        = 31.40703518[kHz]
X_Sweep_Clippped = 25.12562814[kHz]
Irr_Domain     = Proton
Irr_Freq       = 399.78219838[MHz]
Irr_Offset     = 5[ppm]
Clipped        = FALSE
Scans          = 20000
Total_Scans    = 20000

Relaxation_Delay = 1.5[s]
Recvr_Gain       = 50
Temp_Get         = 21[dC]
X_90_Width      = 8.7[us]
X_Acq_Time      = 1.04333312[s]
X_Angle         = 30[deg]
X_Atn           = 4[dB]
X_Pulse         = 2.9[us]
Irr_Atn_Dec     = 22.569[dB]
Irr_Atn_No     = 22.569[dB]
Irr_Noise      = WALTZ
Irr_Pwidth     = 0.115[ms]
Decoupling      = TRUE
Initial_Wait    = 1[s]
Noe             = TRUE
Noe Time        = 1.5[s]

```

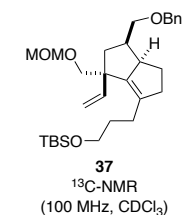

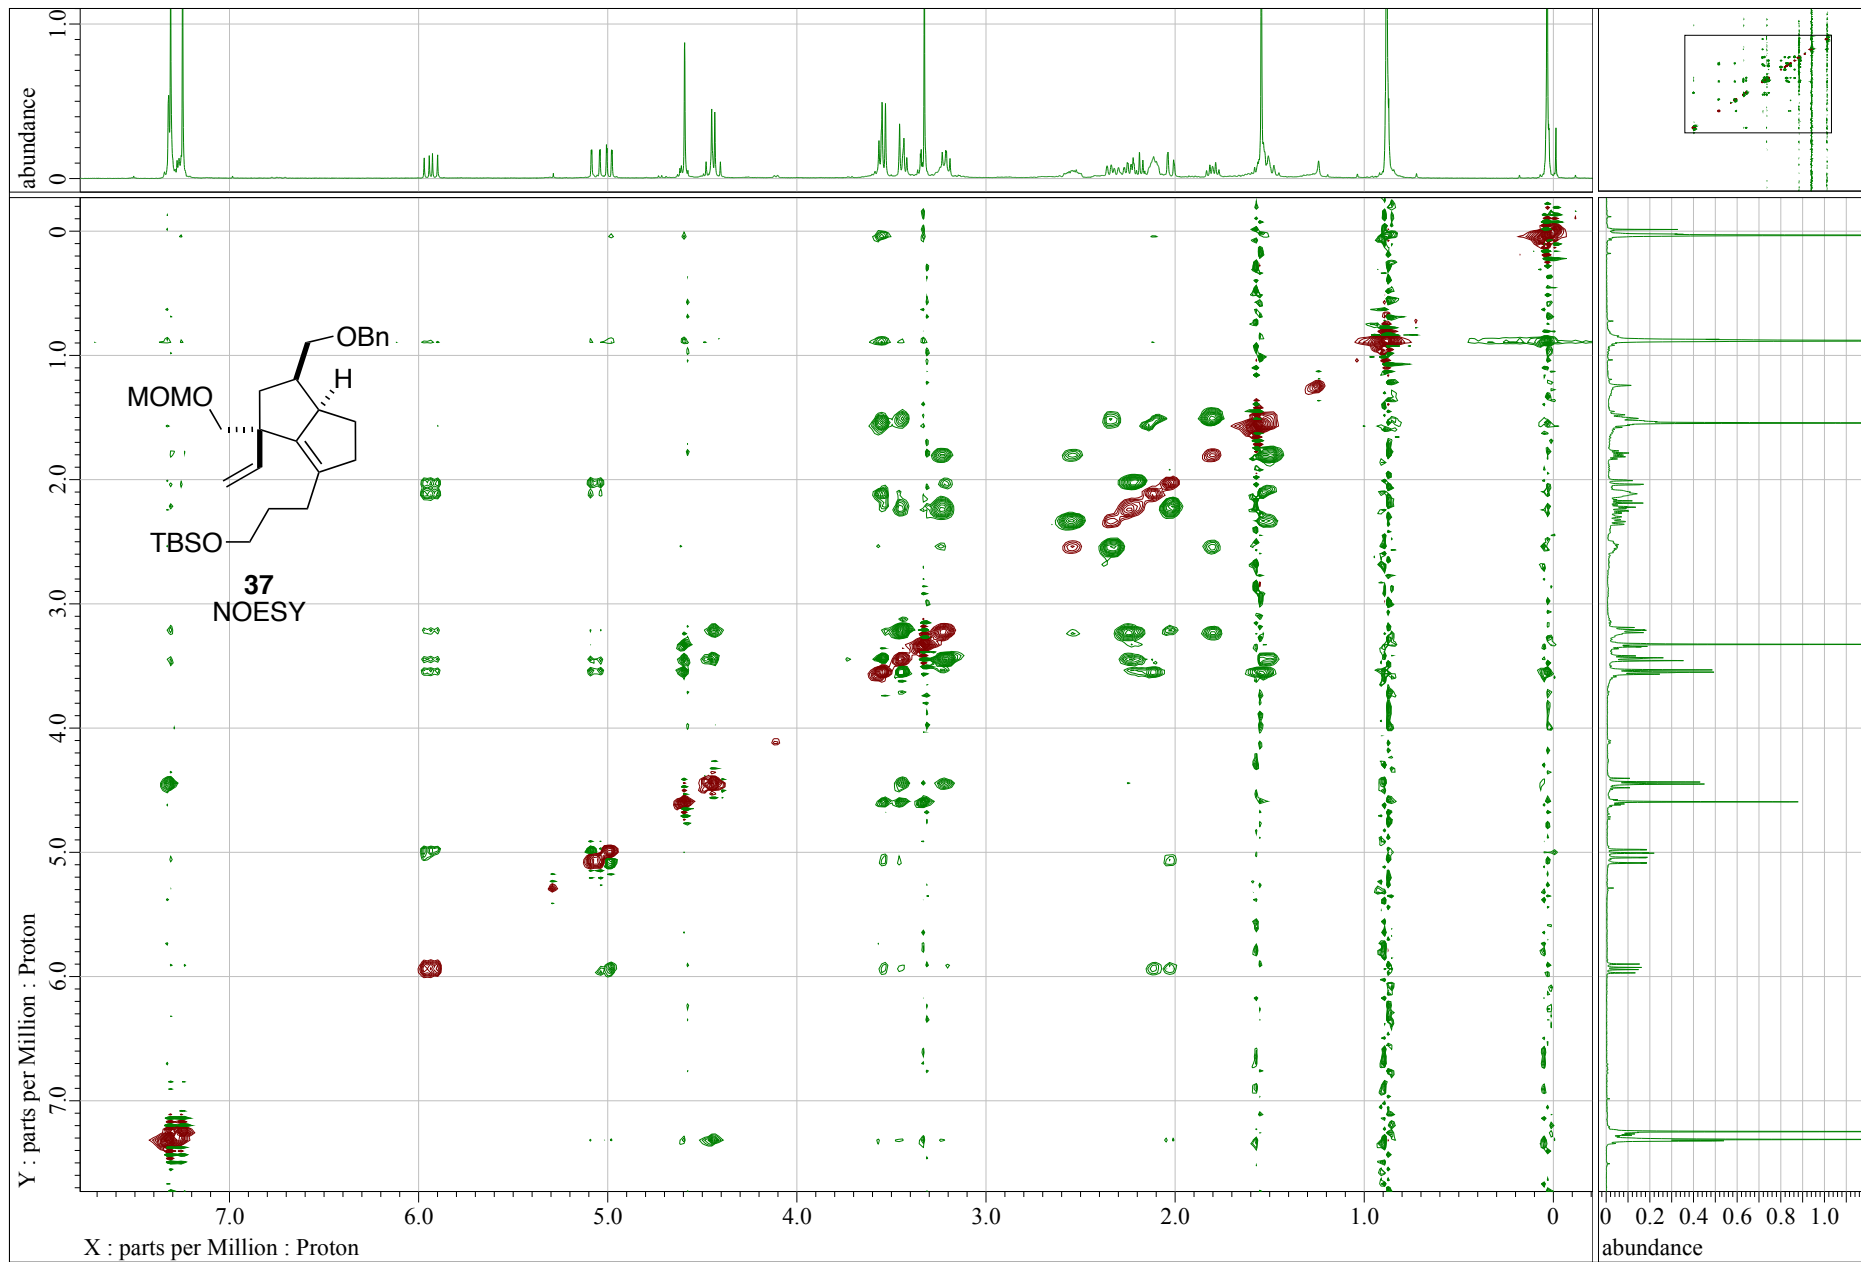

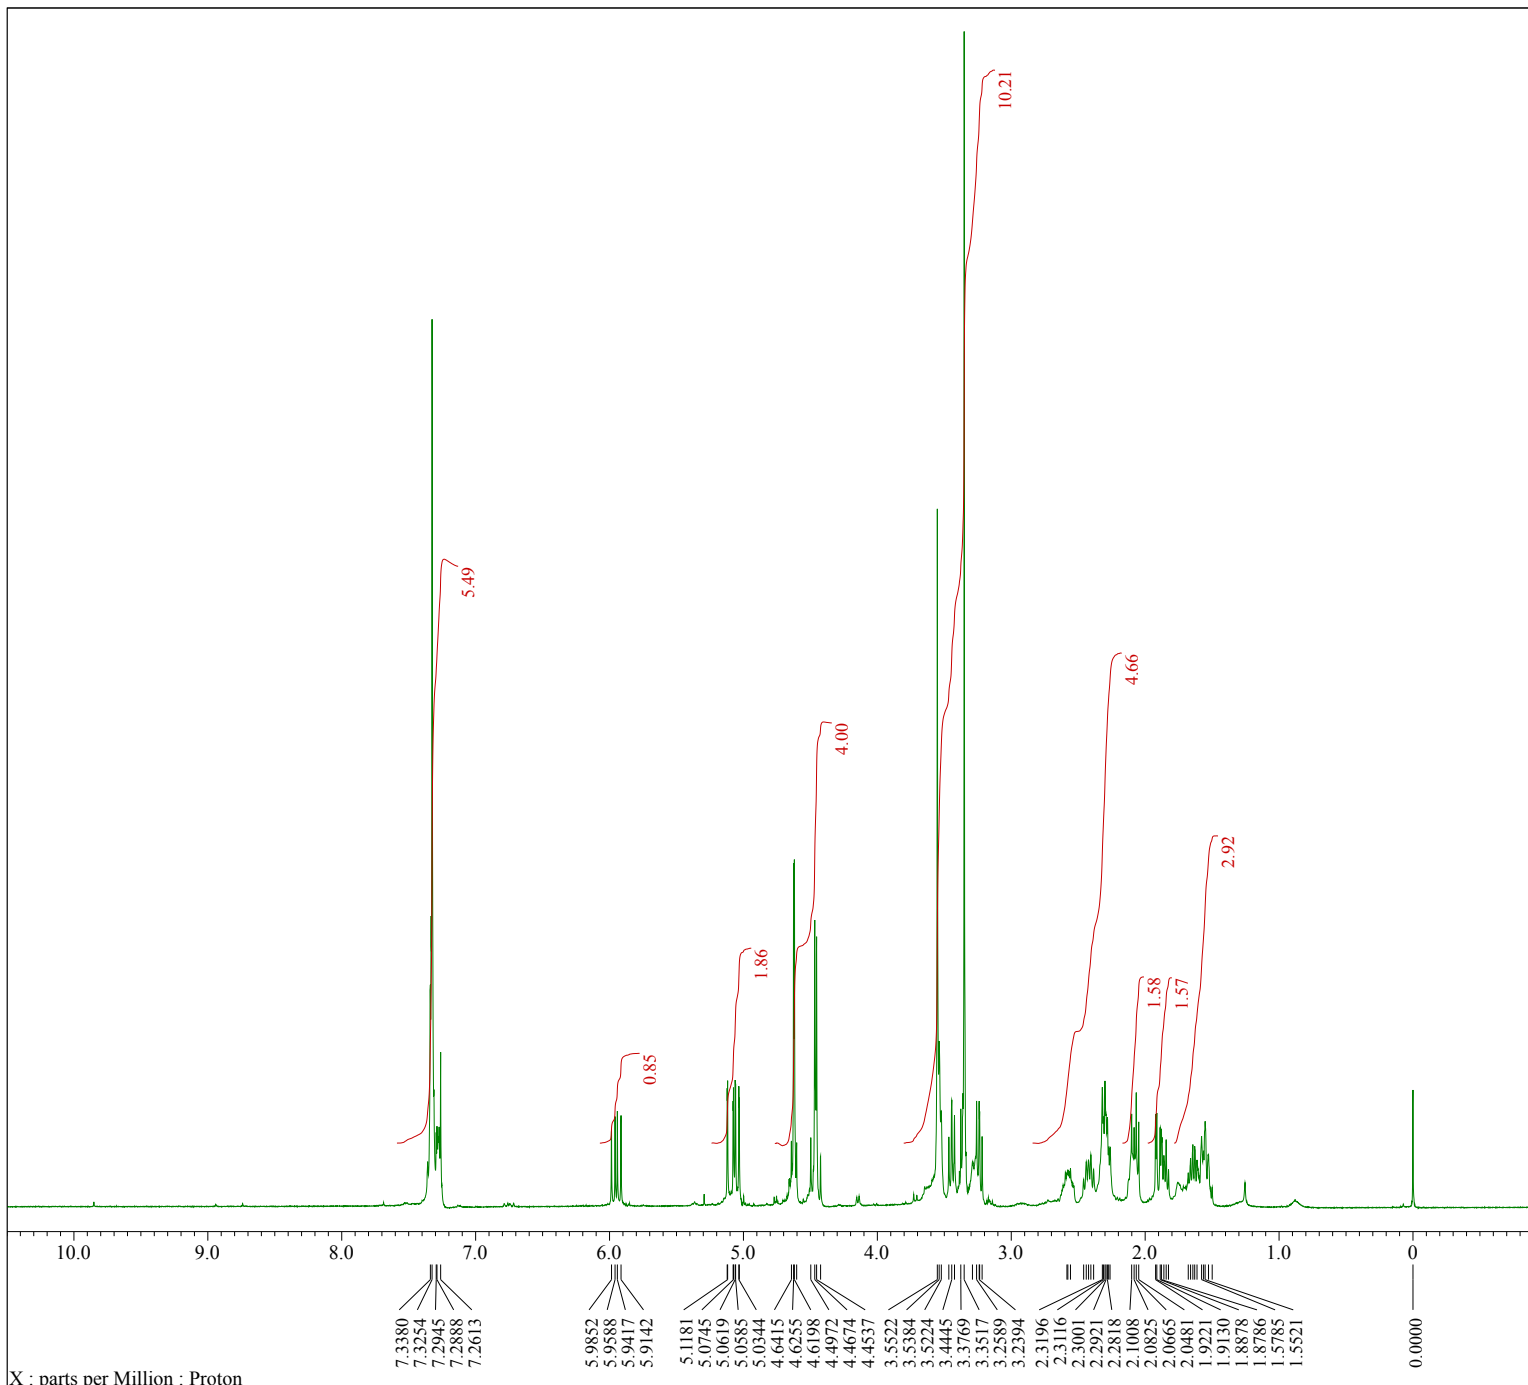

X : parts per Million : Proton

Filename = yk06104\_non-data-1-3.jd  
 Author = delta  
 Experiment = single\_pulse.jxp  
 Sample\_Id = 104  
 Solvent = CHLOROFORM-D  
 Creation Time = 15-JAN-2017 09:19:14  
 Revision Time = 20-FEB-2018 20:59:23  
 Current Time = 20-FEB-2018 21:00:24

Data Format = 1D COMPLEX  
 Dim\_Size = 13107  
 Dim\_Title = Proton  
 Dim\_Units = [ppm]  
 Dimensions = X  
 Site = JNM-ECS400  
 Spectrometer = DELTA2\_NMR

Field Strength = 9.389766[T] (400[MHz])  
 X\_Acq\_Duration = 2.18365952[s]  
 X\_Domain = 1H  
 X\_Freq = 399.78219838[MHz]  
 X\_Offset = 5[ppm]  
 X\_Points = 16384  
 X\_Prescans = 1  
 X\_Resolution = 0.45794685[Hz]  
 X\_Sweep = 7.5030012[kHz]  
 X\_Sweep\_Clippped = 6.00240096[kHz]  
 Irr\_Domain = Proton  
 Irr\_Freq = 399.78219838[MHz]  
 Irr\_Offset = 5[ppm]  
 Tri\_Domain = Proton  
 Tri\_Freq = 399.78219838[MHz]  
 Tri\_Offset = 5[ppm]  
 Clipped = FALSE  
 Scans = 2  
 Total\_Scans = 2

Relaxation\_Delay = 5[s]  
 Recvr\_Gain = 32  
 Temp\_Get = 20.9[dC]  
 X\_90\_Width = 10.025[us]  
 X\_Acq\_Time = 2.18365952[s]  
 X\_Angle = 45[deg]  
 X\_Atn = 1[dB]  
 X\_Pulse = 5.0125[us]  
 Irr\_Mode = Off  
 Tri\_Mode = Off  
 DanTe\_Presat = FALSE  
 Initial\_Wait = 1[s]  
 Repetition Time = 7.18365952[s]

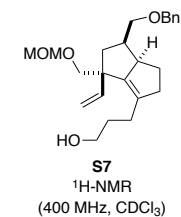

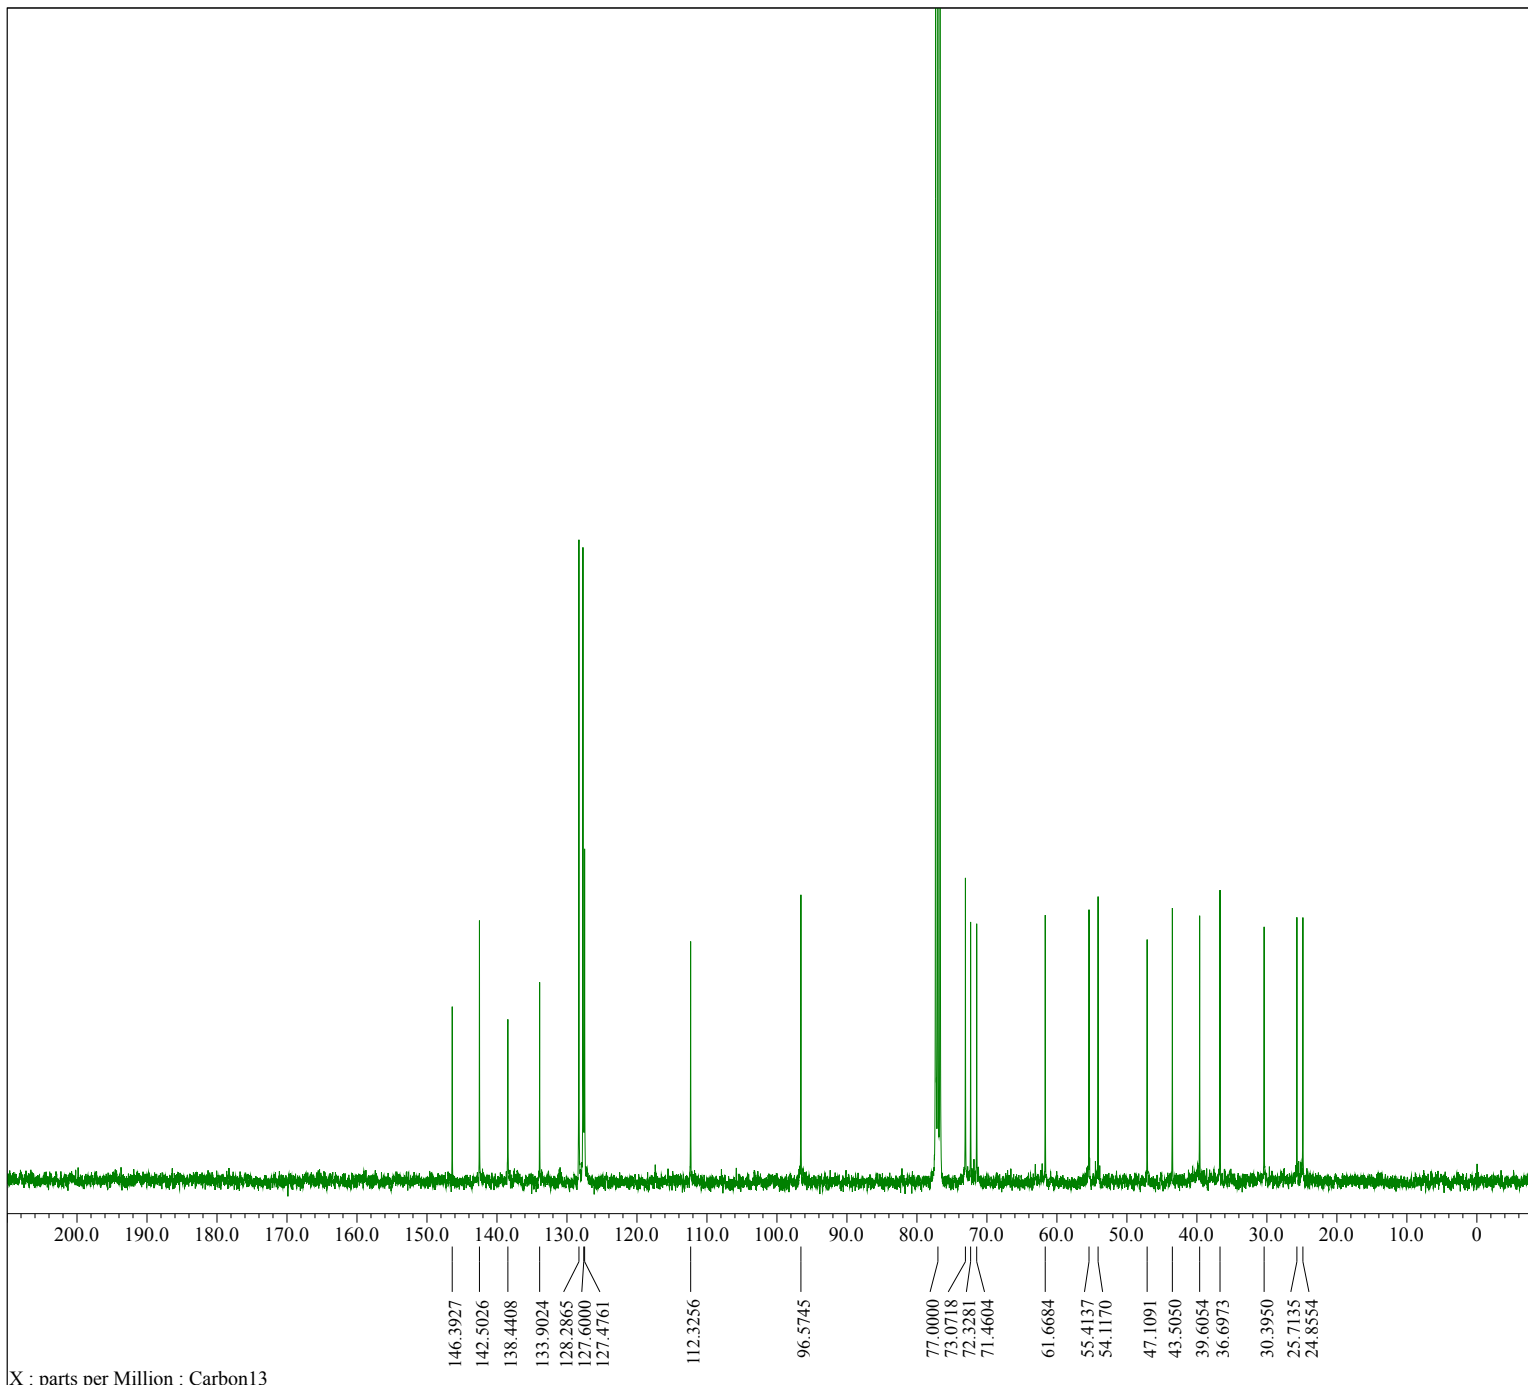

```

Filename      = yk06104_bcm-1-3.jdf
Author       = delta
Experiment   = single_pulse_dec.jxp
Sample_Id    = 104
Solvent      = CHLOROFORM-D
Creation Time = 15-JAN-2017 09:25:34
Revision Time = 20-FEB-2018 17:25:14
Current Time  = 20-FEB-2018 17:25:57

Data Format   = 1D COMPLEX
Dim_Size     = 26214
Dim_Title    = Carbon13
Dim_Units    = [ppm]
Dimensions   = X
Site         = JNM-ECS400
Spectrometer = DELTA2_NMR

Field Strength = 9.389766[T] (400[MHz])
X_Acq_Duration = 1.04333312[s]
X_Domain      = 13C
X_Freq        = 100.52530333[MHz]
X_Offset      = 100[ppm]
X_Points      = 32768
X_Prescans    = 4
X_Resolution  = 0.95846665[Hz]
X_Sweep       = 31.40703518[kHz]
X_Sweep_Clippped = 25.12562814[kHz]
Irr_Domain    = Proton
Irr_Freq      = 399.78219838[MHz]
Irr_Offset    = 5[ppm]
Clipped       = FALSE
Scans         = 3000
Total_Scans   = 3000

Relaxation_Delay = 1.5[s]
Recvr_Gain       = 50
Temp_Get         = 21[dC]
X_90_Width      = 8.7[us]
X_Acq_Time      = 1.04333312[s]
X_Angle         = 30[deg]
X_Atn           = 4[dB]
X_Pulse         = 2.9[us]
Irr_Atn_Dec     = 22.569[dB]
Irr_Atn_No     = 22.569[dB]
Irr_Noise      = WALTZ
Irr_Pwidth     = 0.115[ms]
Decoupling      = TRUE
Initial_Wait    = 1[s]
Noe             = TRUE
Noe Time       = 1.5[s]

```

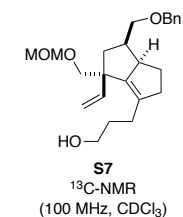

X : parts per Million : Carbon13

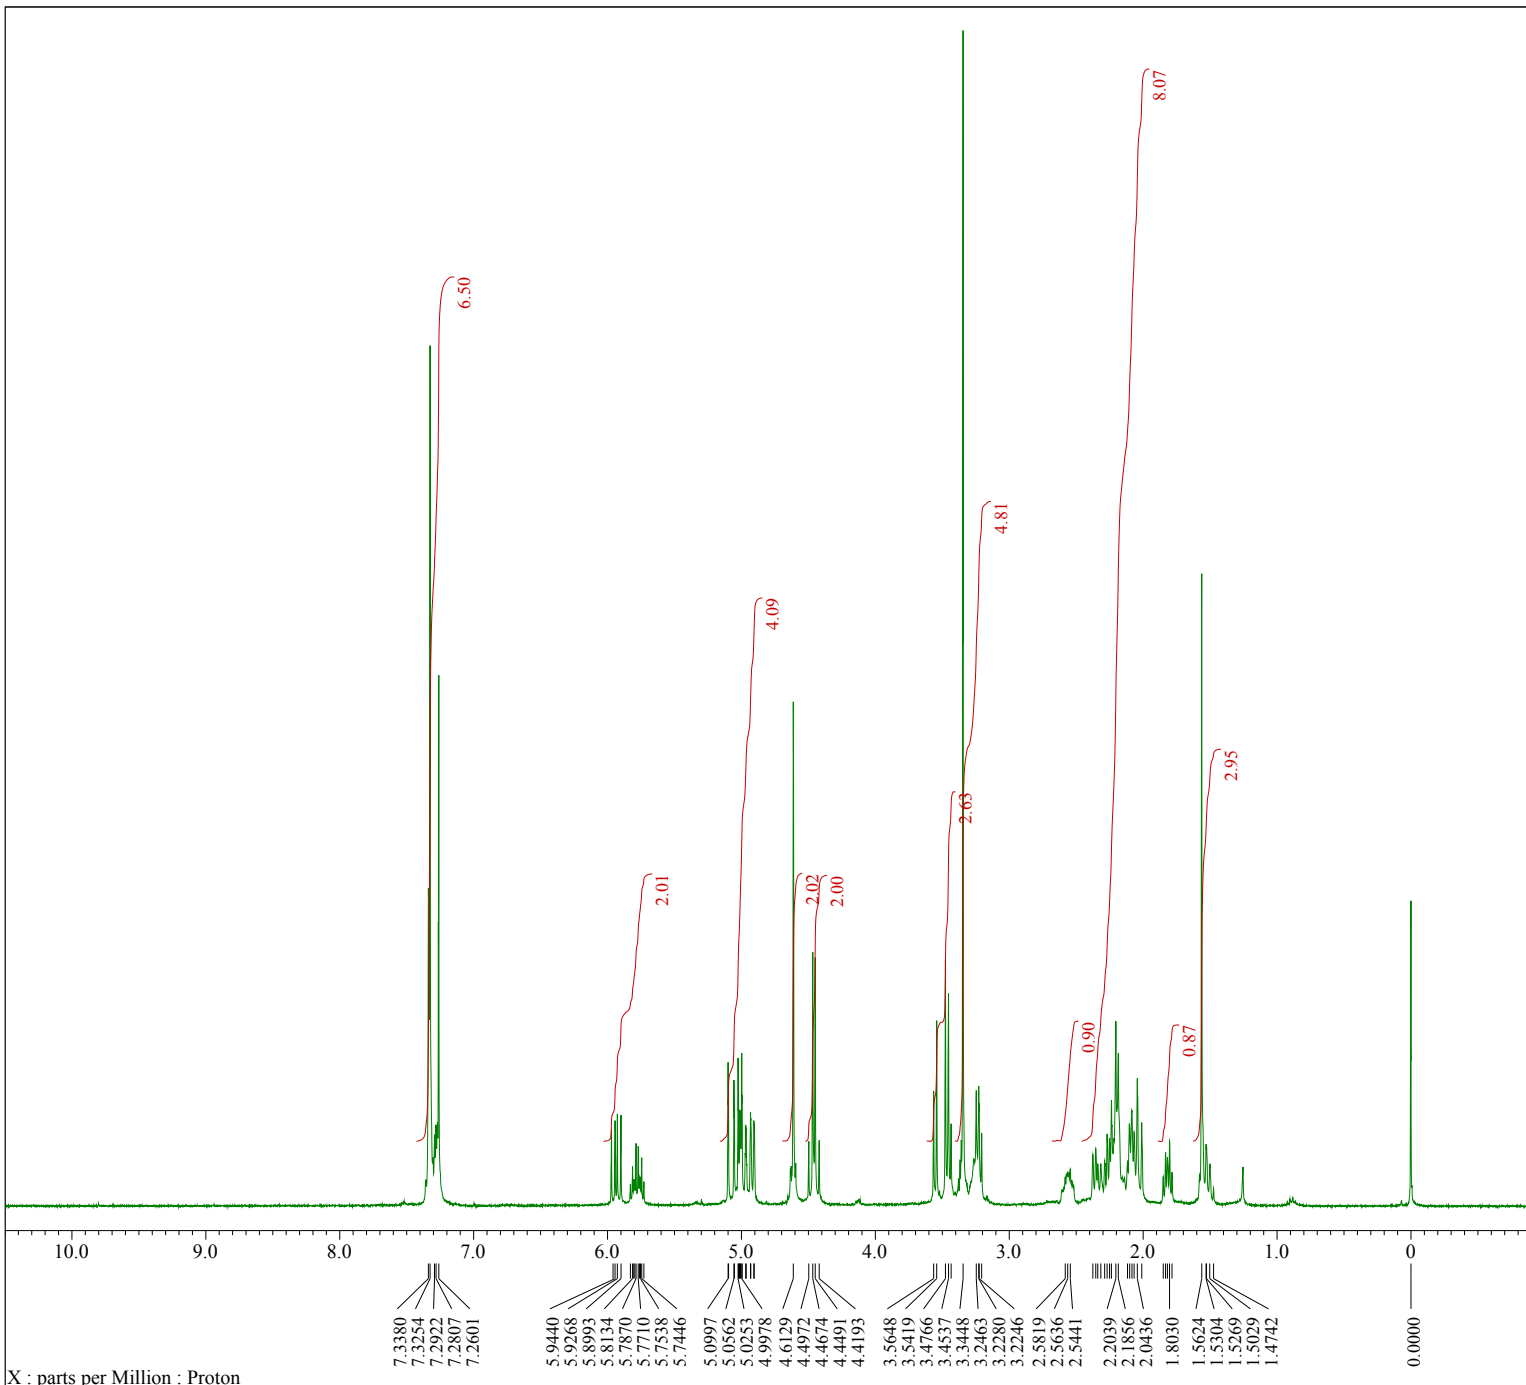

Filename = yk06121data\_non-data-2-  
 Author = delta  
 Experiment = single\_pulse.jxp  
 Sample\_Id = yk06121data  
 Solvent = CHLOROFORM-D  
 Creation Time = 22-DEC-2016 15:45:26  
 Revision Time = 20-FEB-2018 21:04:12  
 Current Time = 20-FEB-2018 21:04:50

Data Format = 1D COMPLEX  
 Dim\_Size = 13107  
 Dim\_Title = Proton  
 Dim\_Units = [ppm]  
 Dimensions = X  
 Site = JNM-ECS400  
 Spectrometer = DELTA2\_NMR

Field Strength = 9.389766[T] (400[MHz])  
 X\_Acq\_Duration = 2.18365952[s]  
 X\_Domain = 1H  
 X\_Freq = 399.78219838[MHz]  
 X\_Offset = 5[ppm]  
 X\_Points = 16384  
 X\_Prescans = 1  
 X\_Resolution = 0.45794685[Hz]  
 X\_Sweep = 7.5030012[kHz]  
 X\_Sweep\_Clippped = 6.00240096[kHz]  
 Irr\_Domain = Proton  
 Irr\_Freq = 399.78219838[MHz]  
 Irr\_Offset = 5[ppm]  
 Tri\_Domain = Proton  
 Tri\_Freq = 399.78219838[MHz]  
 Tri\_Offset = 5[ppm]  
 Clipped = TRUE  
 Scans = 8  
 Total\_Scans = 8

Relaxation\_Delay = 5[s]  
 Recvr\_Gain = 50  
 Temp\_Get = 23.1[dC]  
 X\_90\_Width = 10.025[us]  
 X\_Acq\_Time = 2.18365952[s]  
 X\_Angle = 45[deg]  
 X\_Atn = 1[dB]  
 X\_Pulse = 5.0125[us]  
 Irr\_Mode = Off  
 Tri\_Mode = Off  
 DanTe\_Presat = FALSE  
 Initial\_Wait = 1[s]  
 Repetition Time = 7.18365952[s]

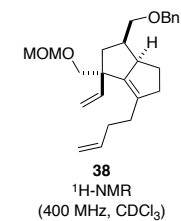

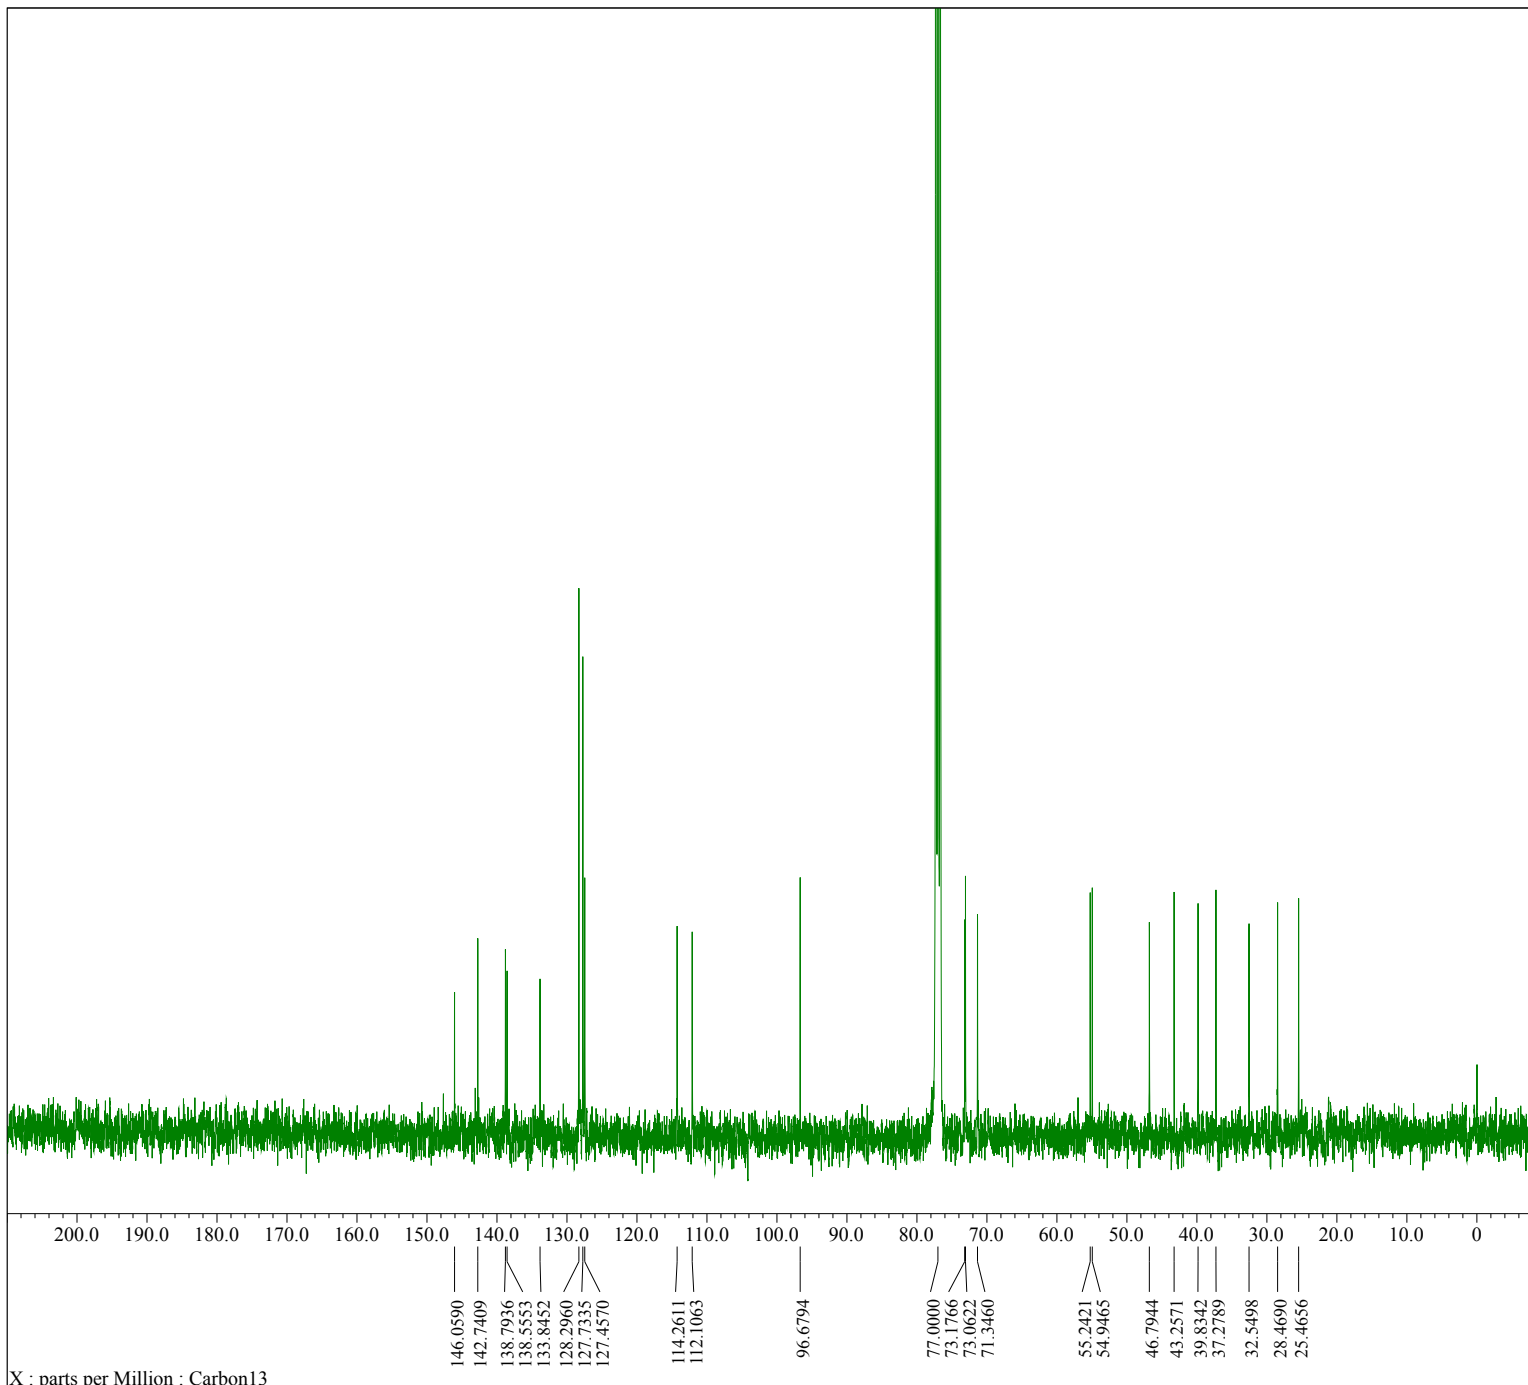

Filename = yk06121data\_bcm-1-3.jcf  
 Author = delta  
 Experiment = single\_pulse\_dec.jxp  
 Sample\_Id = yk06121data  
 Solvent = CHLOROFORM-D  
 Creation Time = 22-DEC-2016 01:03:56  
 Revision Time = 20-FEB-2018 17:27:28  
 Current Time = 20-FEB-2018 17:28:08

Data Format = 1D COMPLEX  
 Dim\_Size = 26214  
 Dim Title = Carbon13  
 Dim Units = [ppm]  
 Dimensions = X  
 Site = JNM-ECS400  
 Spectrometer = DELTA2\_NMR

Field Strength = 9.389766[T] (400[MHz])  
 X\_Acq\_Duration = 1.04333312[s]  
 X\_Domain = 13C  
 X\_Freq = 100.52530333[MHz]  
 X\_Offset = 100[ppm]  
 X\_Points = 32768  
 X\_Prescans = 4  
 X\_Resolution = 0.95846665[Hz]  
 X\_Sweep = 31.40703518[kHz]  
 X\_Sweep\_Clippped = 25.12562814[kHz]  
 Irr\_Domain = Proton  
 Irr\_Freq = 399.78219838[MHz]  
 Irr\_Offset = 5[ppm]  
 Clipped = FALSE  
 Scans = 6000  
 Total\_Scans = 6000

Relaxation\_Delay = 1.5[s]  
 Recvr\_Gain = 50  
 Temp\_Get = 22.8[dC]  
 X\_90\_Width = 8.7[us]  
 X\_Acq Time = 1.04333312[s]  
 X\_Angle = 30[deg]  
 X\_Atn = 4[dB]  
 X\_Pulse = 2.9[us]  
 Irr\_Atn\_Dec = 22.569[dB]  
 Irr\_Atn\_NoE = 22.569[dB]  
 Irr\_Noise = WALTZ  
 Irr\_Pwidth = 0.115[ms]  
 Decoupling = TRUE  
 Initial\_Wait = 1[s]  
 Noe = TRUE  
 Noe Time = 1.5[s]

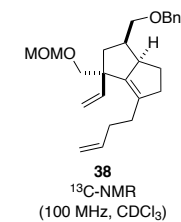

X : parts per Million : Carbon13

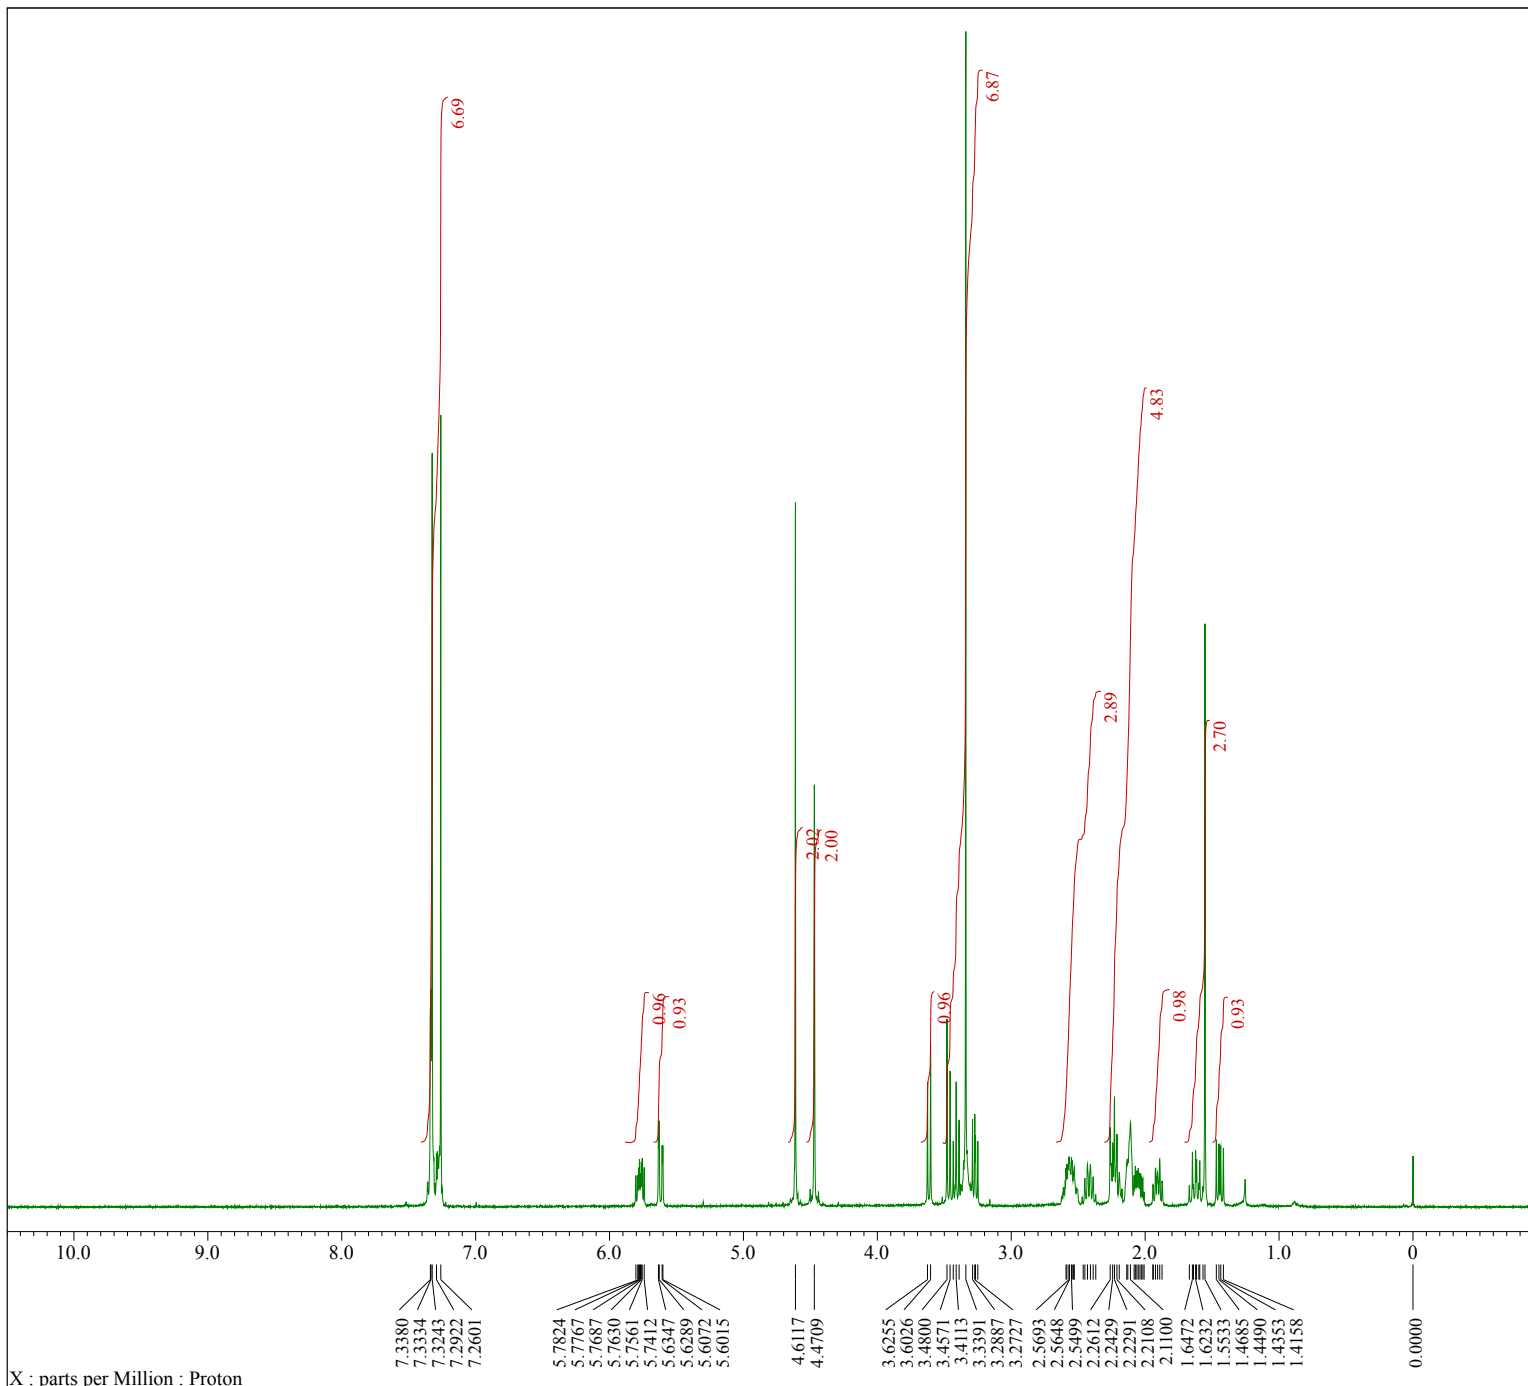

Filename = yk06122data\_non-data-1-  
 Author = delta  
 Experiment = single\_pulse.jxp  
 Sample\_Id = yk06122data  
 Solvent = CHLOROFORM-D  
 Creation Time = 13-JAN-2017 11:28:55  
 Revision Time = 20-FEB-2018 21:08:19  
 Current Time = 20-FEB-2018 21:10:51

Data Format = 1D COMPLEX  
 Dim\_Size = 13107  
 Dim\_Title = Proton  
 Dim\_Units = [ppm]  
 Dimensions = X  
 Site = JNM-ECS400  
 Spectrometer = DELTA2\_NMR

Field Strength = 9.389766[T] (400[MHz])  
 X\_Acq\_Duration = 2.18365952[s]  
 X\_Domain = 1H  
 X\_Freq = 399.78219838[MHz]  
 X\_Offset = 5[ppm]  
 X\_Points = 16384  
 X\_Prescans = 1  
 X\_Resolution = 0.45794685[Hz]  
 X\_Sweep = 7.5030012[kHz]  
 X\_Sweep\_Clippped = 6.00240096[kHz]  
 Irr\_Domain = Proton  
 Irr\_Freq = 399.78219838[MHz]  
 Irr\_Offset = 5[ppm]  
 Tri\_Domain = Proton  
 Tri\_Freq = 399.78219838[MHz]  
 Tri\_Offset = 5[ppm]  
 Clipped = FALSE  
 Scans = 8  
 Total\_Scans = 8

Relaxation\_Delay = 5[s]  
 Recvr\_Gain = 44  
 Temp\_Get = 22[dC]  
 X\_90\_Width = 10.025[us]  
 X\_Acq\_Time = 2.18365952[s]  
 X\_Angle = 45[deg]  
 X\_Atn = 1[dB]  
 X\_Pulse = 5.0125[us]  
 Irr\_Mode = Off  
 Tri\_Mode = Off  
 Dante\_Presat = FALSE  
 Initial\_Wait = 1[s]  
 Repetition Time = 7.18365952[s]

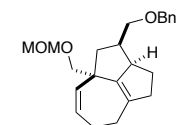

**39**  
<sup>1</sup>H-NMR  
 (400 MHz, CDCl<sub>3</sub>)

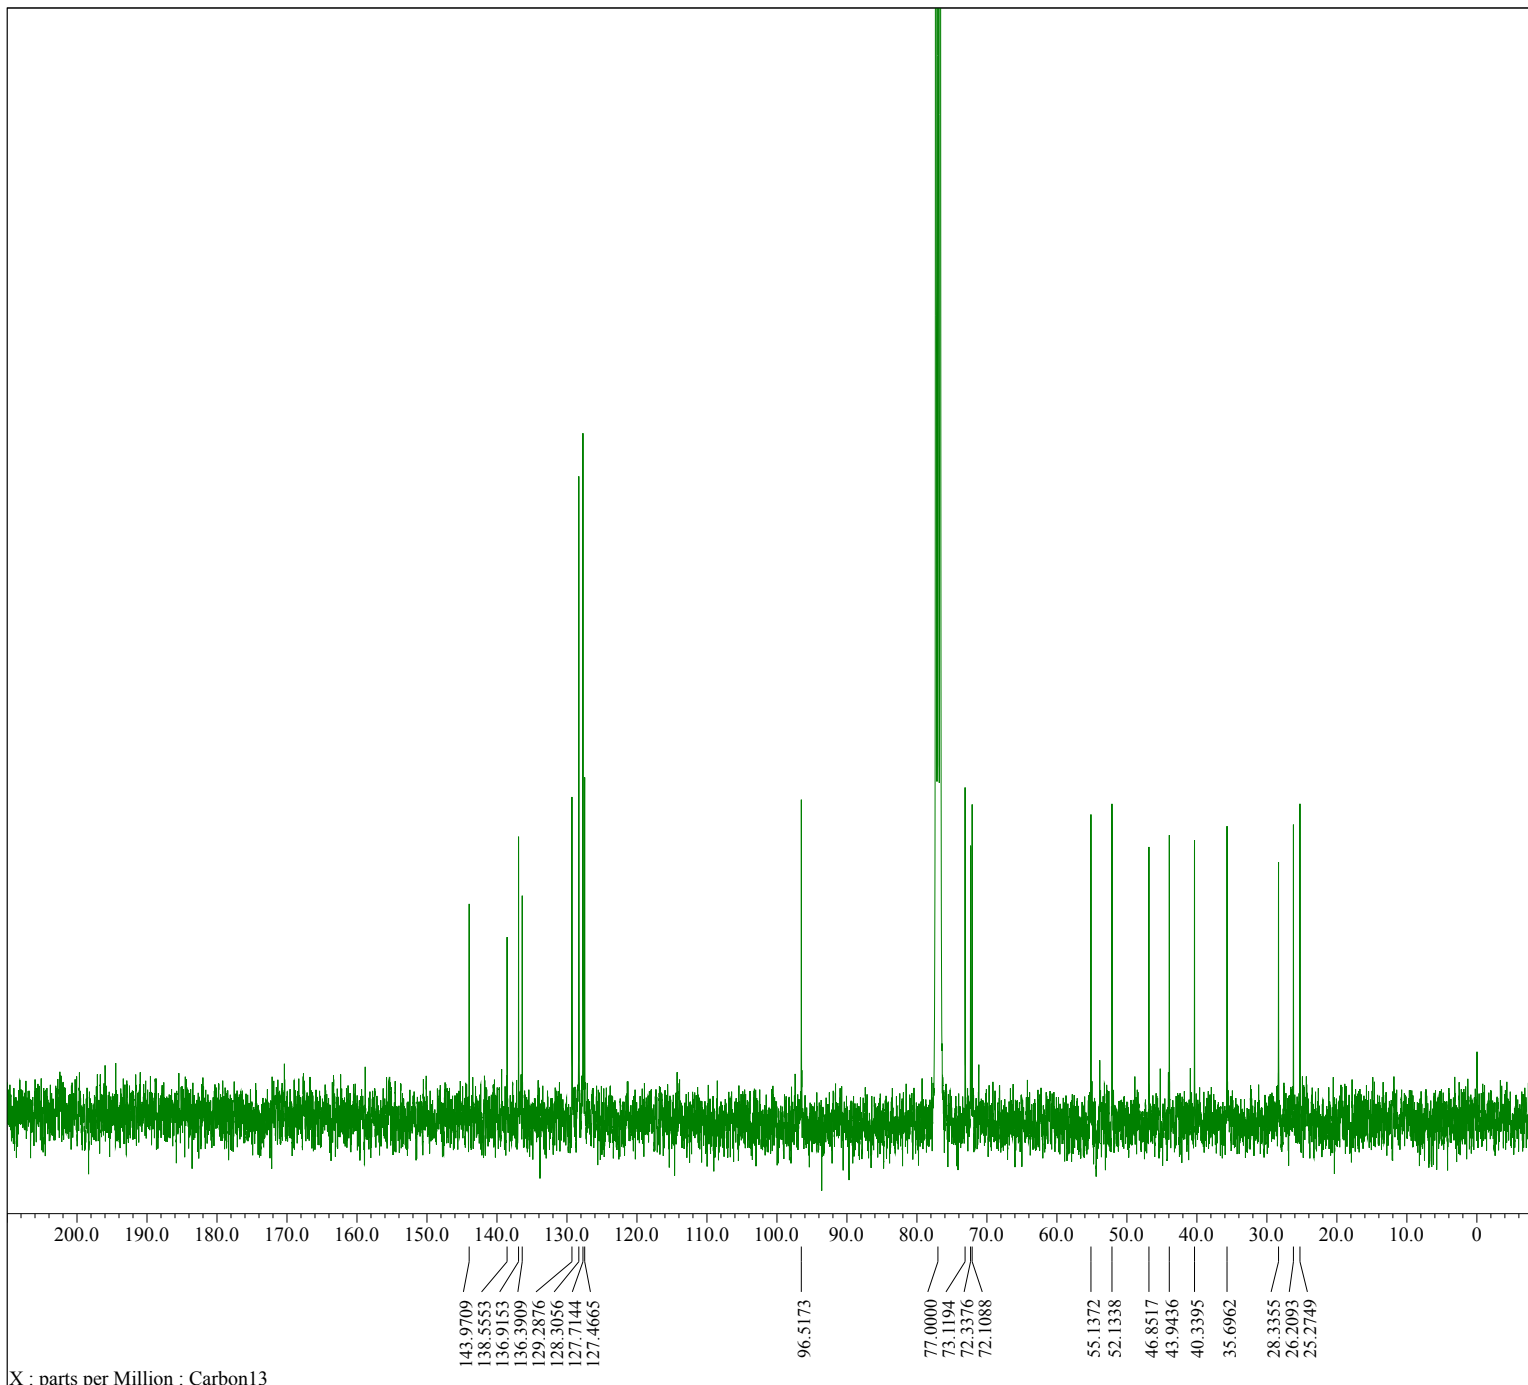

```

Filename      = yk06122data_bcm-1-3.jcf
Author       = delta
Experiment   = single_pulse_dec.jxp
Sample_Id    = yk06122data
Solvent      = CHLOROFORM-D
Creation Time = 23-DEC-2016 01:02:27
Revision Time = 20-FEB-2018 17:29:40
Current Time  = 20-FEB-2018 17:30:21
  
```

```

Data Format    = 1D COMPLEX
Dim_Size      = 26214
Dim_Title     = Carbon13
Dim_Units     = [ppm]
Dimensions    = X
Site          = JNM-ECS400
Spectrometer  = DELTA2_NMR
  
```

```

Field Strength = 9.389766[T] (400[MHz])
X_Acq_Duration = 1.04333312[s]
X_Domain       = 13C
X_Freq         = 100.52530333[MHz]
X_Offset       = 100[ppm]
X_Points       = 32768
X_Prescans     = 4
X_Resolution   = 0.95846665[Hz]
X_Sweep        = 31.40703518[kHz]
X_Sweep_Clippped = 25.12562814[kHz]
Irr_Domain     = Proton
Irr_Freq       = 399.78219838[MHz]
Irr_Offset     = 5[ppm]
Clipped        = FALSE
Scans          = 6000
Total_Scans    = 6000
  
```

```

Relaxation_Delay = 1.5[s]
Recvr_Gain       = 50
Temp_Get         = 22.9[dC]
X_90_Width       = 8.7[us]
X_Acq_Time       = 1.04333312[s]
X_Angle          = 30[deg]
X_Atn            = 4[dB]
X_Pulse          = 2.9[us]
Irr_Atn_Dec      = 22.569[dB]
Irr_Atn_Noise   = 22.569[dB]
Irr_Noise       = WALTZ
Irr_Pwidth       = 0.115[ms]
Decoupling       = TRUE
Initial_Wait     = 1[s]
Noe              = TRUE
Noe Time         = 1.5[s]
  
```

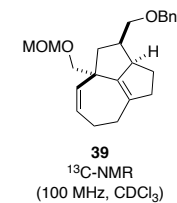



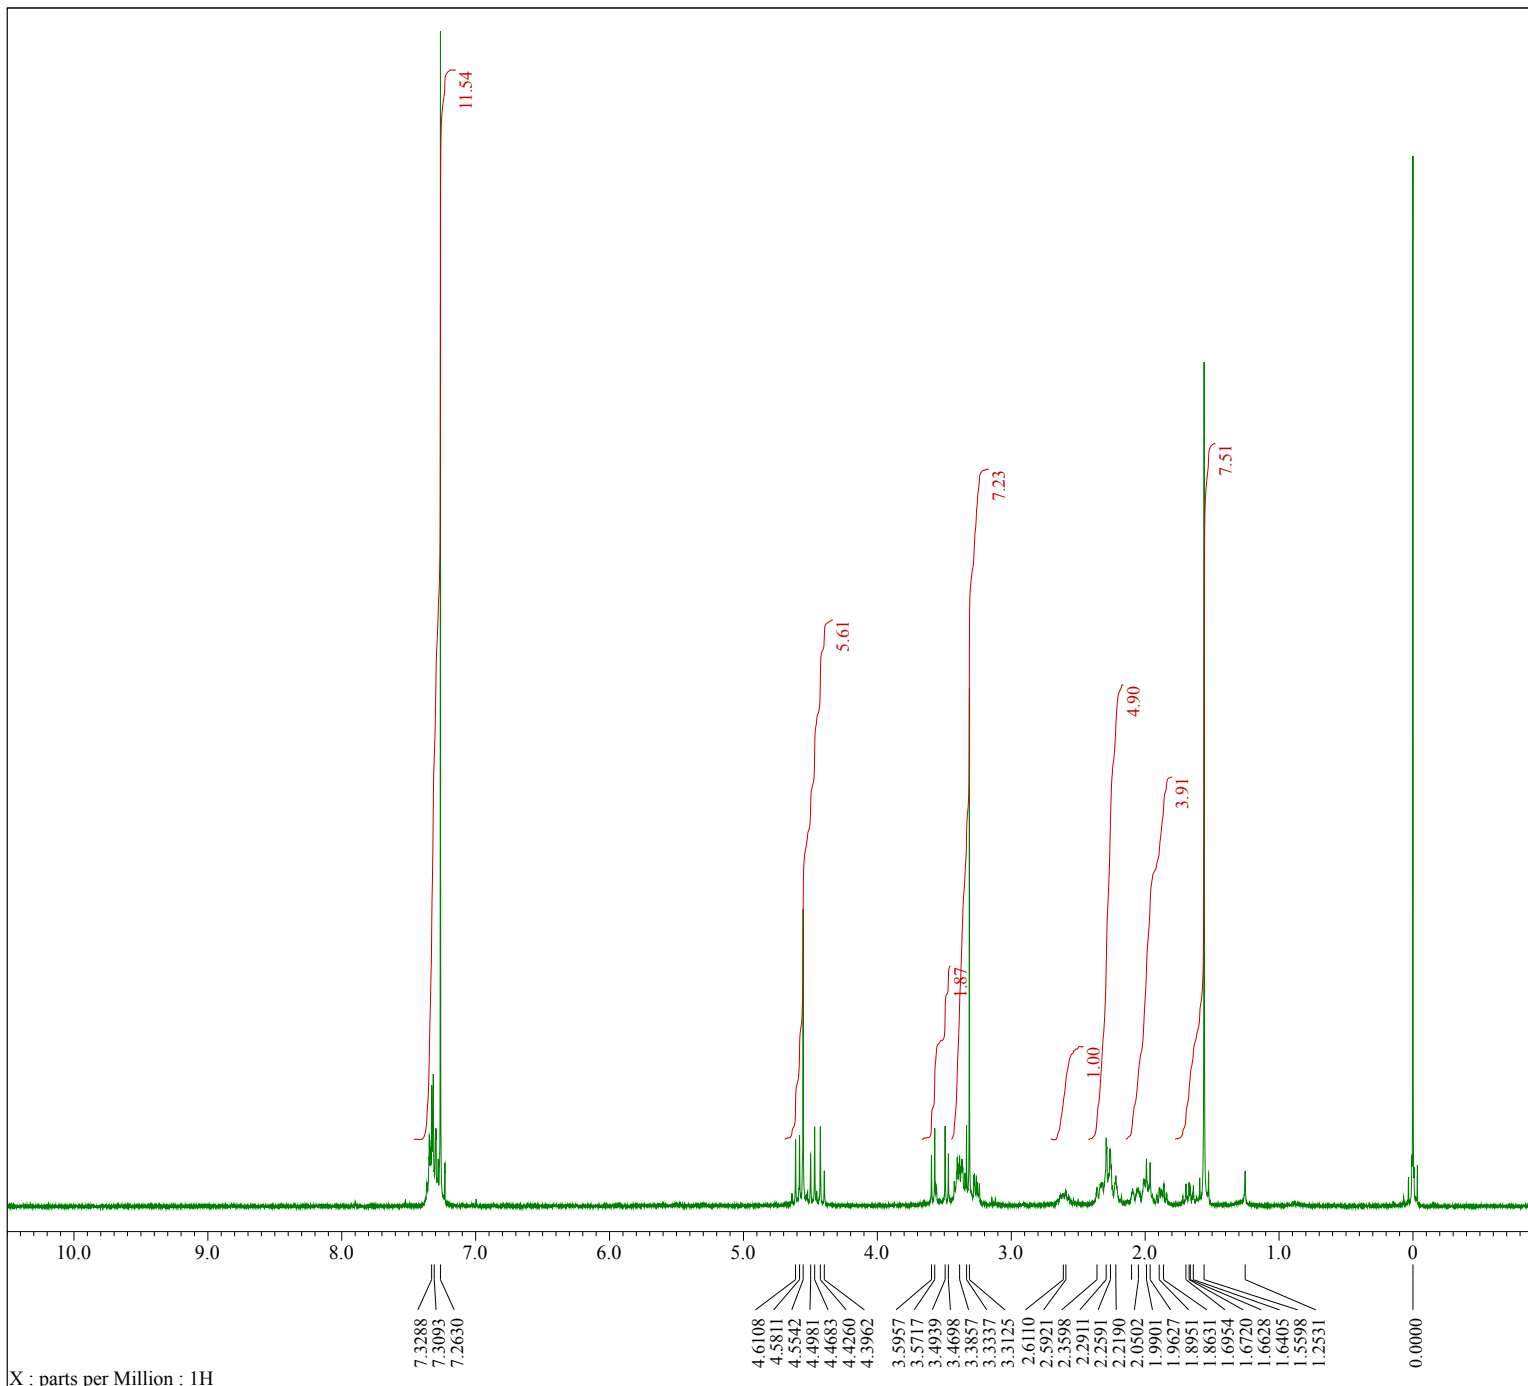

Filename = yk06136-4.jdf  
 Author = delta  
 Experiment = single\_pulse.ex2  
 Sample\_Id = 1H-single\_pulse  
 Solvent = CHLOROFORM-D  
 Creation Time = 17-FEB-2017 22:16:16  
 Revision Time = 22-FEB-2018 11:07:52  
 Current Time = 22-FEB-2018 11:08:38

Comment = 1H-single\_pulse  
 Data Format = 1D COMPLEX  
 Dim Size = 26214  
 Dim Title = 1H  
 Dim Units = [ppm]  
 Dimensions = X  
 Site = ECS 400  
 Spectrometer = JNM-ECS400

Field Strength = 9.2982153[T] (400[MHz])  
 X\_Acq\_Duration = 4.41450496[s]  
 X\_Domain = 1H  
 X\_Freq = 395.88430144[MHz]  
 X\_Offset = 5[ppm]  
 X\_Points = 32768  
 X\_Prescans = 1  
 X\_Resolution = 0.22652597[Hz]  
 X\_Sweep = 7.42280285[kHz]  
 Irr\_Domain = 1H  
 Irr\_Freq = 395.88430144[MHz]  
 Irr\_Offset = 5[ppm]  
 Tri\_Domain = 1H  
 Tri\_Freq = 395.88430144[MHz]  
 Tri\_Offset = 5[ppm]  
 Clipped = FALSE  
 Scans = 8  
 Total\_Scans = 8

Relaxation\_Delay = 5[s]  
 Recvr\_Gain = 54  
 Temp\_Get = 19.5[dC]  
 X\_90\_Width = 10.09[us]  
 X\_Acq\_Time = 4.41450496[s]  
 X\_Angle = 45[deg]  
 X\_Atn = 1.1[dB]  
 X\_Pulse = 5.045[us]  
 Irr\_Mode = Off  
 Tri\_Mode = Off  
 DanTe\_Presat = FALSE  
 Initial\_Wait = 1[s]  
 Repetition Time = 9.41450496[s]

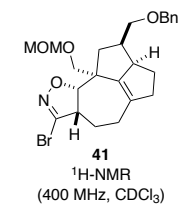

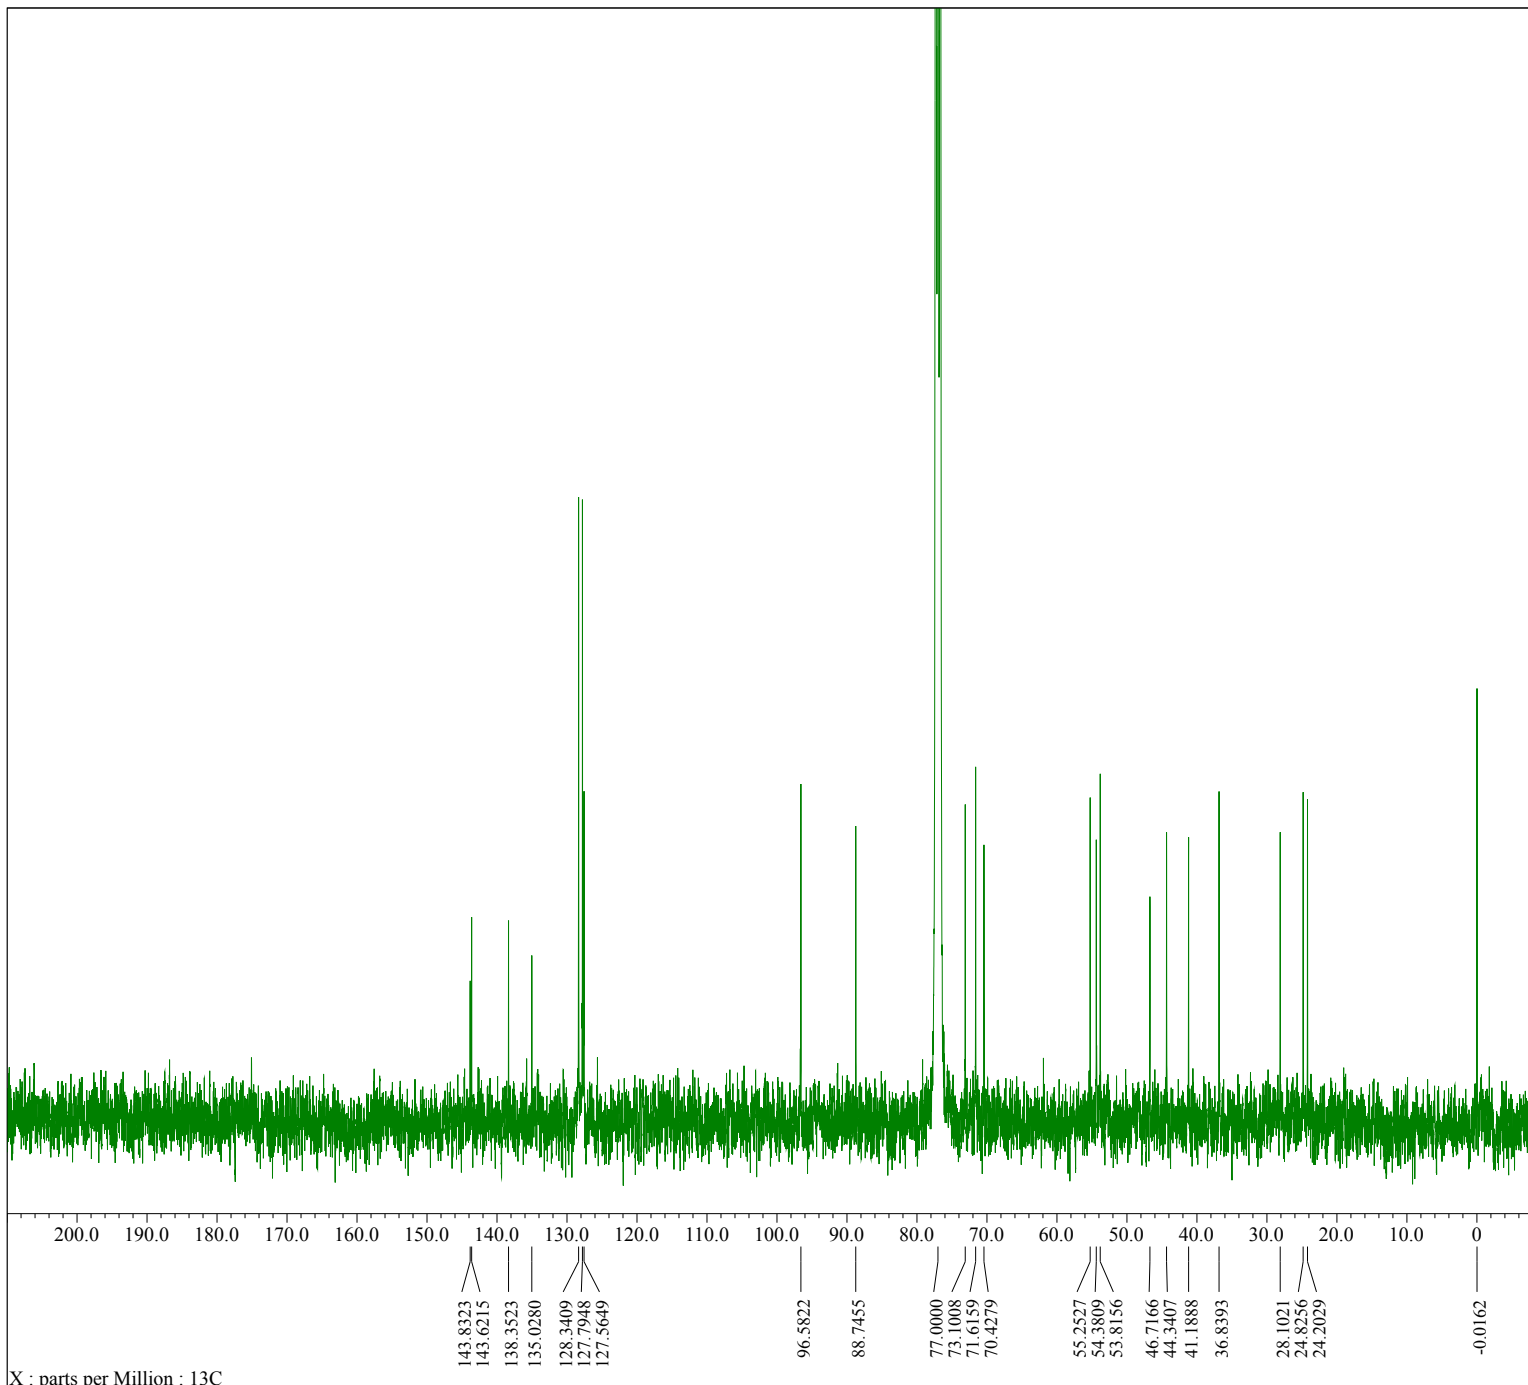

```

Filename      = yk0613613CC-4.jdf
Author       = delta
Experiment   = single_pulse_dec
Sample_Id    = 13C-single_pulse_dec
Solvent      = CHLOROFORM-D
Creation Time = 18-FEB-2017 07:58:33
Revision Time = 22-FEB-2018 10:55:39
Current Time  = 22-FEB-2018 10:56:38

Comment      = single pulse decoupled
Data_Format  = 1D COMPLEX
Dim_Size     = 26214
Dim_Title    = 13C
Dim_Units    = [ppm]
Dimensions   = X
Site         = ECS 400
Spectrometer = JNM-ECS400

Field Strength = 9.2982153[T] (400[MHz])
X_Acq_Duration = 1.048576[s]
X_Domain       = 13C
X_Freq         = 99.54517646[MHz]
X_Offset       = 100[ppm]
X_Points       = 32768
X_Prescans     = 4
X_Resolution  = 0.95367432 [Hz]
X_Sweep        = 31.25 [kHz]
Irr_Domain     = 1H
Irr_Freq       = 395.88430144[MHz]
Irr_Offset     = 5[ppm]
Clipped        = FALSE
Scans          = 11409
Total_Scans    = 11409

Relaxation_Delay = 2[s]
Recvr_Gain       = 60
Temp_Get         = 19.8[dC]
X_90_Width      = 8.82[us]
X_Acq_Time       = 1.048576[s]
X_Angle         = 30[deg]
X_Atn           = 4.2[dB]
X_Pulse         = 2.94[us]
Irr_Atn_Dec     = 22.23613[dB]
Irr_Atn_Noise  = 22.23613[dB]
Irr_Noise       = WALTZ
Decoupling      = TRUE
Initial_Wait    = 1[s]
Noe              = TRUE
Noe_Time        = 2[s]
Repetition Time = 3.048576[s]

```

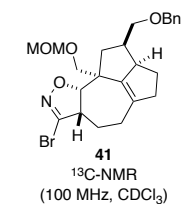

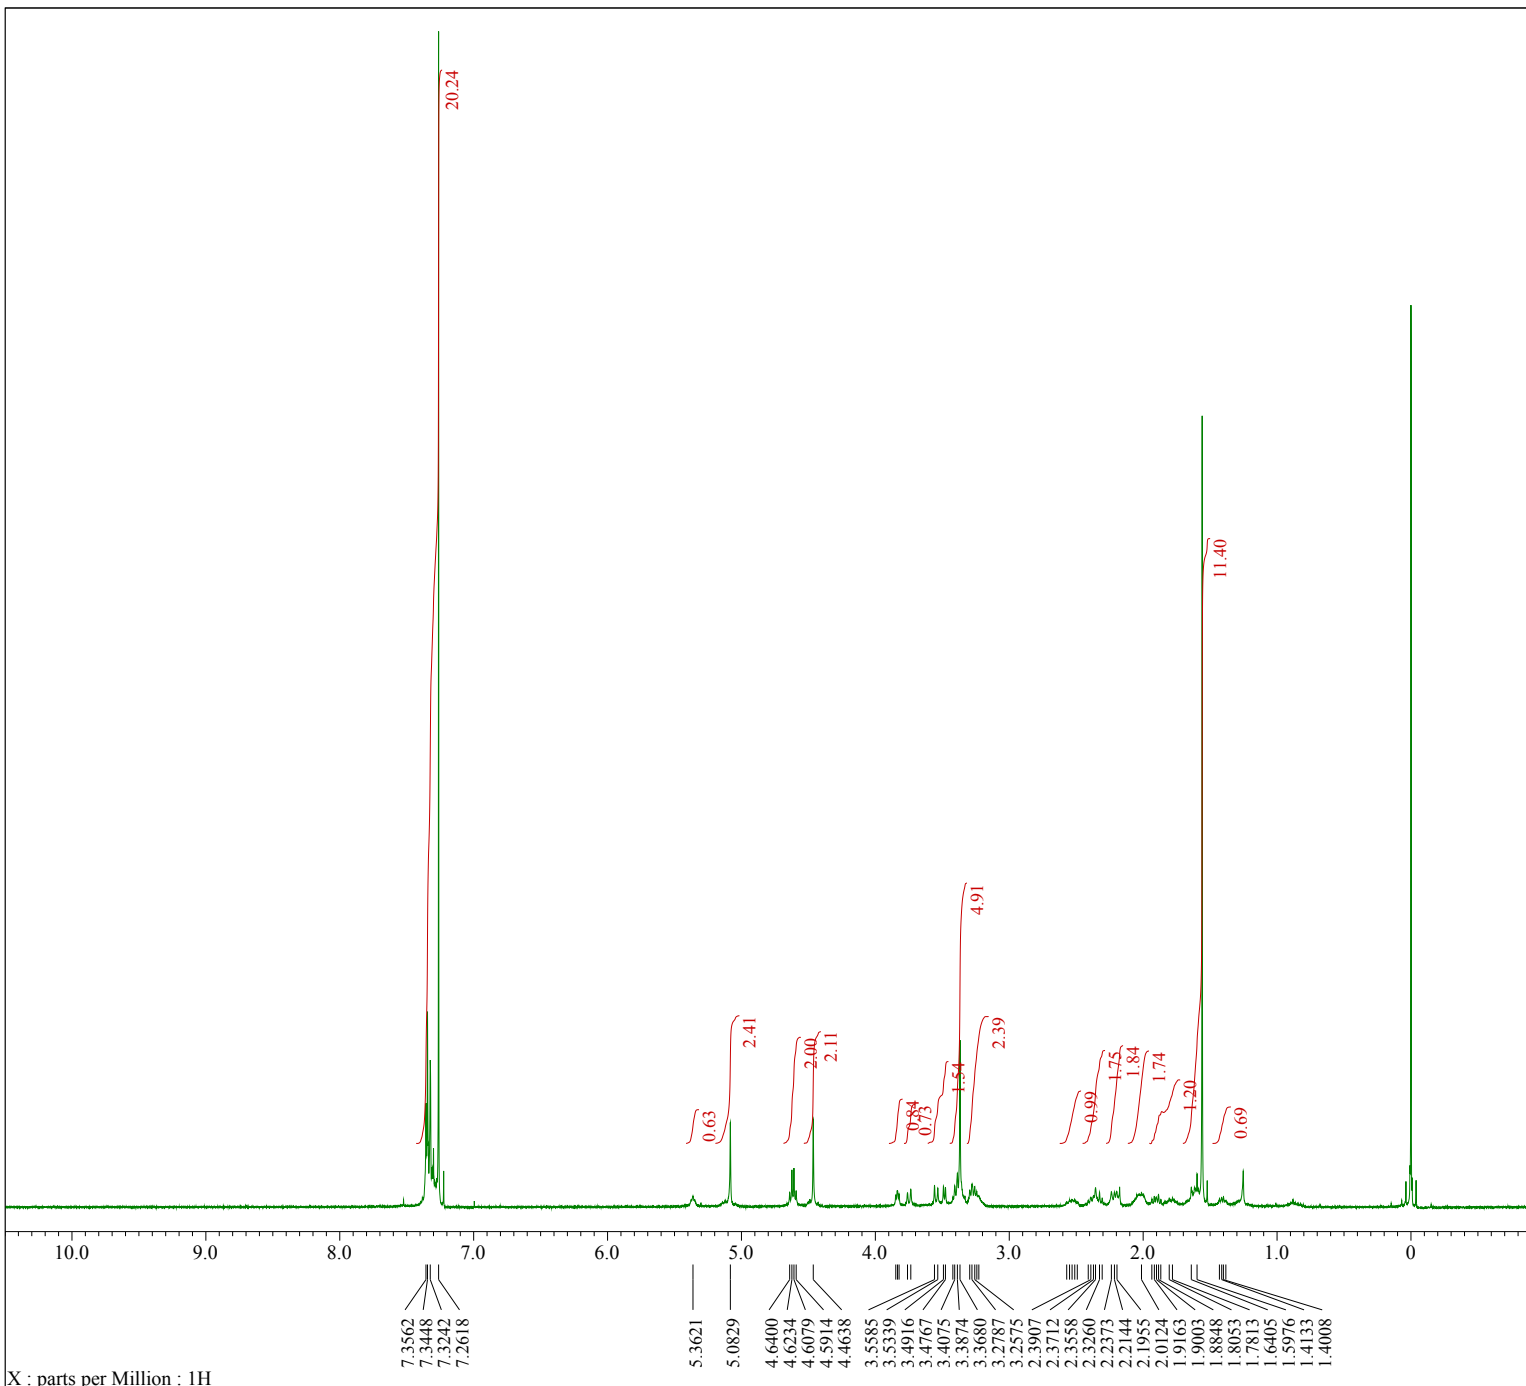

Filename = yk06148-4.jdf  
 Author = delta  
 Experiment = single\_pulse.ex2  
 Sample\_Id = 1H-single\_pulse  
 Solvent = CHLOROFORM-D  
 Creation\_Time = 22-FEB-2017 22:16:55  
 Revision\_Time = 22-FEB-2018 11:15:05  
 Current\_Time = 22-FEB-2018 11:15:41

Comment = 1H-single\_pulse  
 Data\_Format = 1D COMPLEX  
 Dim\_Size = 26214  
 Dim\_Title = 1H  
 Dim\_Units = [ppm]  
 Dimensions = X  
 Site = ECS 400  
 Spectrometer = JNM-ECS400

Field\_Strength = 9.2982153[T] (400[MHz])  
 X\_Acq\_Duration = 4.41450496[s]  
 X\_Domain = 1H  
 X\_Freq = 395.88430144[MHz]  
 X\_Offset = 5[ppm]  
 X\_Points = 32768  
 X\_Prescans = 1  
 X\_Resolution = 0.22652597[Hz]  
 X\_Sweep = 7.42280285[kHz]  
 Irr\_Domain = 1H  
 Irr\_Freq = 395.88430144[MHz]  
 Irr\_Offset = 5[ppm]  
 Tri\_Domain = 1H  
 Tri\_Freq = 395.88430144[MHz]  
 Tri\_Offset = 5[ppm]  
 Clipped = FALSE  
 Scans = 32  
 Total\_Scans = 32

Relaxation\_Delay = 5[s]  
 Recvr\_Gain = 56  
 Temp\_Get = 19.6[dC]  
 X\_90\_Width = 10.09[us]  
 X\_Acq\_Time = 4.41450496[s]  
 X\_Angle = 45[deg]  
 X\_Atn = 1.1[dB]  
 X\_Pulse = 5.045[us]  
 Irr\_Mode = Off  
 Tri\_Mode = Off  
 Dante\_Presat = FALSE  
 Initial\_Wait = 1[s]  
 Repetition\_Time = 9.41450496[s]

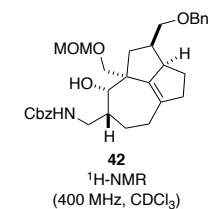

Supplement: c8ob00859k1.pdf [file c8ob00859k1.pdf]
